# Supplementary material
Source: PubMed Central journal article supplement (PMC3815597)
Supplement: NIHMS521643-supplement-Supporting_Information.pdf [file NIHMS521643-supplement-Supporting_Information.pdf]

# **CHEMISTRY**

---

## **A EUROPEAN JOURNAL**

---

### Supporting Information

© Copyright Wiley-VCH Verlag GmbH & Co. KGaA, 69451 Weinheim, 2013

#### **Expanding Insight into Asymmetric Palladium-Catalyzed Allylic Alkylation of N-Heterocyclic Molecules and Cyclic Ketones**

**Nathan B. Bennett, Douglas C. Duquette, Jimin Kim, Wen-Bo Liu,  
Alexander N. Marziale, Douglas C. Behenna, Scott C. Virgil, and Brian M. Stoltz\*<sup>[a]</sup>**

chem\_201300030\_sm\_miscellaneous\_information.pdf

**Materials and Methods.** Unless otherwise stated, reactions were performed in flame-dried glassware under an argon or nitrogen atmosphere using dry, deoxygenated solvents. Reaction progress was monitored by thin-layer chromatography (TLC). Solvents were dried by passage through an activated alumina column under argon.<sup>1</sup> Acetone was used directly from a Sigma-Aldrich ACS reagent grade bottle. Brine solutions are saturated aqueous solutions of sodium chloride. Reagents were purchased from Sigma-Aldrich, Acros Organics, Strem, or Alfa Aesar and used as received unless otherwise stated. (*S*)-*t*-BuPHOX (**3**),<sup>2</sup> (*S*)-(CF<sub>3</sub>)<sub>3</sub>-*t*-BuPHOX (**8**),<sup>3</sup> and allyl cyanofornate<sup>4</sup> were prepared by known methods. Reaction temperatures were controlled by an IKA Mag temperature modulator. TLC was performed using E. Merck silica gel 60 F254 precoated glass plates (0.25 mm) and visualized by UV fluorescence quenching, *p*-anisaldehyde, or KMnO<sub>4</sub> staining. ICN silica gel (particle size 0.032-0.0653 mm) was used for flash column chromatography. Preparative HPLC purification was performed on an Agilent 1200 Series HPLC using an Agilent Prep-SIL column (5 μm, 30 x 250 mm) at ambient temperature with a flow rate of 50 mL/min. Separation was monitored by UV (λ = 254 nm) and fractions were collected at the valleys between peaks. <sup>1</sup>H NMR spectra were recorded on a Varian Mercury 300 MHz or Varian Inova 500 MHz spectrometer and are reported relative to residual CHCl<sub>3</sub> (δ 7.26 ppm) or benzene-d<sub>6</sub> (δ 7.16 ppm). <sup>13</sup>C NMR spectra are recorded on a Varian Mercury 300 MHz or Varian Inova 500 MHz spectrometer (75 or 125 MHz respectively) and are reported relative to CDCl<sub>3</sub> (δ 77.16 ppm) or benzene-d<sub>6</sub> (δ 128.06 ppm). Variable temperature NMR experiments were performed on a Varian Inova 500 MHz spectrometer and are reported relative to residual DMSO (δ 2.50 ppm). Data for <sup>1</sup>H NMR are reported as follows: chemical shift (δ ppm) (multiplicity, coupling constant (Hz), integration). Multiplicities are reported as follows: s = singlet, d = doublet, t = triplet, q = quartet, p = pentet, sept = septuplet, m = multiplet, dm = doublet of multiplets, br s = broad singlet, br d = broad doublet, app = apparent. Data for <sup>13</sup>C are reported in terms of chemical shifts (δ ppm). IR spectra were obtained by use of a Perkin Elmer Spectrum BXII spectrometer using thin films deposited on NaCl plates and reported in frequency of absorption (cm<sup>-1</sup>). Optical rotations were measured with a Jasco P-2000 polarimeter operating on the sodium D-line (589 nm), using a 100 mm path-length cell and are reported as: [α]<sub>D</sub><sup>T</sup> (concentration in g/100 mL, solvent, *ee*). Analytical chiral HPLC was performed with an Agilent 1100 Series HPLC utilizing a Chiralpak (AD, AD-H, or AS) or Chiralcel (OD-H, OJ-H, or OB-H) columns (4.6 mm x 25 cm) obtained from Daicel Chemical Industries, Ltd. Analytical chiral SFC was performed with a JASCO 2000 series instrument or a Thar SFC utilizing Chiralpak (AD-H or AS-H) or Chiralcel (OD-H, OJ-H, or OB-H) columns (4.6 mm x 25 cm), or a Chiralpak IC column (4.6 mm x 10 cm) obtained from Daicel Chemical Industries, Ltd. High resolution mass spectra (HRMS) were obtained from the Caltech Mass Spectral Facility (GC-EI+, EI+, or FAB+) or Agilent 6200 Series TOF with an Agilent G1978A Multimode source in electrospray ionization (ESI+), atmospheric pressure chemical ionization (APCI+), or mixed ionization mode (MM: ESI-APCI+).

**List of Abbreviations.** The following abbreviations are used in the experimental procedures:

DMAP = 4-(dimethylamino)pyridine  
IPA = isopropyl alcohol  
LDA = lithium diisopropylamide  
LiHMDS = lithium bis(trimethylsilyl)amide

## Procedures for the Preparation of Compounds Related to Enaminone Screen

### Enaminone Allylic Alkylation Precursors

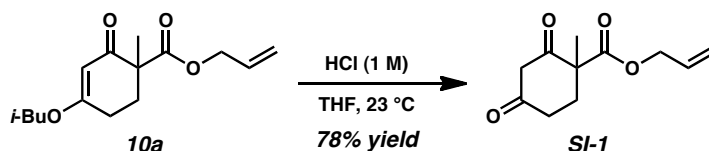

**Dione SI-1.** A 100 mL round-bottom flask equipped with a magnetic stir bar was charged with vinyllogous ester **10a**<sup>5</sup> (3.08 g, 11.58 mmol, 1.00 equiv), THF (30 mL, 0.39 M), and aq. HCl (1 M in H<sub>2</sub>O, 14.00 mL, 14.00 mmol, 1.21 equiv). The reaction was initially a suspension that developed into a solution over time. After 7 h of vigorous stirring at ambient temperature, the reaction was diluted with EtOAc (30 mL) and transferred to a separatory funnel where the aqueous layer was extracted seven times with EtOAc. The combined organics (400 mL) were dried over MgSO<sub>4</sub>, filtered, and concentrated under reduced pressure. The crude oil was purified by flash column chromatography (SiO<sub>2</sub>, 31 x 5 cm, 100% hexanes→20%→50% EtOAc in hexanes) to afford dione **SI-1** (1.89 g, 11.58 mmol, 78% yield) as a pale yellow oil; *R<sub>f</sub>* = 0.17 (30% EtOAc in hexanes); <sup>1</sup>H NMR (500 MHz, CDCl<sub>3</sub>) and <sup>13</sup>C NMR (125 MHz, CDCl<sub>3</sub>) mixture of keto-enol tautomers, see spectra section; IR (Neat Film NaCl) 3500–2500 (broad stretch), 3088, 2983, 2939, 2657, 2591, 1734, 1595, 1457, 1413, 1383, 1358, 1343, 1309, 1272, 1249, 1190, 1114, 986, 932, 853 cm<sup>-1</sup>; HRMS (MM: ESI-APCI+) *m/z* calc'd for C<sub>11</sub>H<sub>15</sub>O<sub>4</sub> [M+H]<sup>+</sup>: 211.0965, found 211.0966.

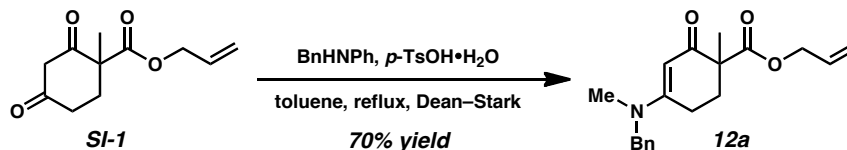

**Enaminone 12a.** A 50 mL round-bottom flask containing a magnetic stir bar was charged with dione **SI-1** (465.4 mg, 2.21 mmol, 1.00 equiv), toluene (24 mL, 0.09 M), benzylmethylamine (320 μL, 2.48 mmol, 1.12 equiv), and *p*-toluenesulfonic acid monohydrate (42.3 mg, 0.22 mmol, 10 mol %). The flask was equipped with a Dean–Stark trap and water condenser and was lowered into a preheated oil bath (135 °C). After 2 h of refluxing, the solution was removed from the oil bath and allowed to cool to room temperature. The solution was quenched with a sat. Na<sub>2</sub>CO<sub>3</sub> solution (20 mL) and transferred to a separatory funnel where the aqueous layer was extracted four times with CH<sub>2</sub>Cl<sub>2</sub>. The combined organics (200 mL) were dried over MgSO<sub>4</sub>, filtered, and concentrated under reduced pressure. The crude oil was purified by flash column chromatography (SiO<sub>2</sub>, 27 x 3 cm, 100% hexanes→20%→50%→60%→70% EtOAc in hexanes) to afford enaminone **12a** (484.8 mg, 1.55 mmol, 70% yield) as a yellow/orange oil; *R<sub>f</sub>* = 0.24 (50% EtOAc in hexanes); <sup>1</sup>H NMR (500 MHz, CDCl<sub>3</sub>) δ 7.37–7.33 (m, 2H), 7.32–7.27 (m, 1H), 7.09 (d, *J* = 7.4 Hz, 2H), 5.93–5.83 (m, 1H), 5.29 (dq, *J* = 17.3, 1.5 Hz, 1H), 5.26 (s, 1H), 5.18 (dq, *J* = 10.5, 1.4 Hz, 1H), 4.66–4.56 (m, 2H), 4.51 (s, 2H), 2.96 (s, 3H), 2.74–2.63 (m, 1H), 2.56–2.45 (m, 2H), 1.95–1.84 (m, 1H), 1.43 (s, 3H); <sup>13</sup>C NMR (125 MHz, CDCl<sub>3</sub>) δ 193.9, 173.7, 164.3, 132.2, 129.1, 127.8, 126.7, 118.0, 98.1, 65.6, 55.2, 51.1, 38.5, 32.6, 24.4, 21.0; IR (Neat Film NaCl) 3063, 3028, 2933, 2873, 1733, 1615, 1585, 1563, 1557, 1495, 1455, 1415, 1377, 1352, 1332, 1295, 1258, 1222, 1203, 1174, 1113, 1028, 989, 929, 821, 735 cm<sup>-1</sup>; HRMS (MM: ESI-APCI+) *m/z* calc'd for C<sub>19</sub>H<sub>24</sub>NO<sub>3</sub> [M+H]<sup>+</sup>: 314.1751, found 314.1754.

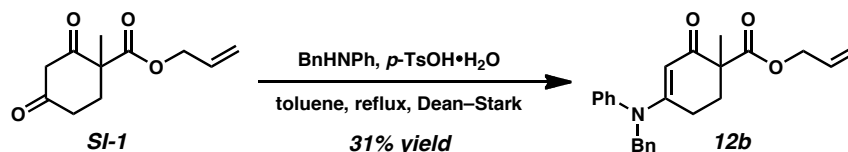

**Enaminone 12b.** A 50 mL round-bottom flask containing a magnetic stir bar was charged with dione **SI-1** (500.3 mg, 2.38 mmol, 1.00 equiv), toluene (24 mL, 0.10 M), benzylphenylamine (480.0 mg, 2.62 mmol, 1.10 equiv), and *p*-toluenesulfonic acid monohydrate (45.6 mg, 0.24 mmol, 10 mol %). The flask was equipped with a Dean–Stark trap and water condenser and was lowered into a preheated oil bath (135 °C). After 8 h of refluxing, the solution was removed from the oil bath and allowed to cool to room temperature. The solution was quenched with a sat.  $\text{Na}_2\text{CO}_3$  solution (20 mL) and transferred to a separatory funnel where the aqueous layer was extracted four times with  $\text{CH}_2\text{Cl}_2$ . The combined organics (200 mL) were dried over  $\text{MgSO}_4$ , filtered, and concentrated under reduced pressure. The crude oil was purified twice by flash column chromatography ( $\text{SiO}_2$ , 26 x 3 cm, 100% hexanes→10%→15%→20%→30%→40% EtOAc in hexanes *then*  $\text{SiO}_2$ , 26.5 x 3 cm, 100% hexanes→5%→10%→15%→20%→30%→50% EtOAc in hexanes) to afford enaminone **12b** (276.6 mg, 0.74 mmol, 31% yield) as a yellow oil;  $R_f = 0.50$  (50% EtOAc in hexanes);  $^1\text{H NMR}$  (500 MHz,  $\text{CDCl}_3$ )  $\delta$  7.38–7.33 (m, 2H), 7.33–7.24 (m, 4H), 7.21–7.18 (m, 2H), 7.13–7.10 (m, 2H), 5.90 (dddd,  $J = 17.2, 10.7, 5.4, 5.4$  Hz, 1H), 5.39 (s, 1H), 5.31 (dq,  $J = 17.2, 1.6$  Hz, 1H), 5.21 (dq,  $J = 10.5, 1.4$  Hz, 1H), 4.83 (s, 2H), 4.68–4.63 (m, 1H), 4.62–4.57 (m, 1H), 2.55–2.47 (m, 1H), 2.42 (ddd,  $J = 13.3, 6.1, 4.9$  Hz, 1H), 2.33–2.27 (m, 1H), 1.84 (ddd,  $J = 13.5, 8.7, 4.9$  Hz, 1H), 1.42 (s, 3H);  $^{13}\text{C NMR}$  (125 MHz,  $\text{CDCl}_3$ )  $\delta$  194.6, 173.3, 163.9, 144.3, 136.4, 132.2, 129.9, 128.9, 128.0, 127.9, 127.7, 127.1, 118.0, 100.4, 65.6, 56.8, 51.6, 32.9, 25.9, 21.0; IR (Neat Film NaCl) 3061, 3031, 2975, 2933, 2872, 1734, 1623, 1560, 1494, 1453, 1426, 1408, 1377, 1346, 1327, 1293, 1255, 1210, 1174, 1112, 1080, 1061, 1022, 989, 929, 885, 825, 779, 733, 702  $\text{cm}^{-1}$ ; HRMS (MM: ESI-APCI+)  $m/z$  calc'd for  $\text{C}_{24}\text{H}_{26}\text{NO}_3$   $[\text{M}+\text{H}]^+$ : 376.1907, found 376.1903.

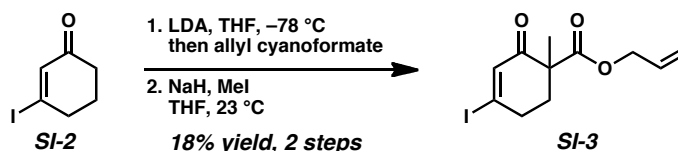

**$\beta$ -Iodoenone SI-3.** A 200 mL round-bottom flask equipped with a magnetic stir bar was charged with diisopropyl amine (1.52 mL, 10.85 mmol, 1.19 equiv) and THF (36 mL). The flask was lowered into a 0 °C bath (ice/water) and *n*-BuLi (4.5 mL, 2.3 M in hexanes, 10.35 mmol, 1.14 equiv) was added dropwise over several minutes. The reaction was stirred for 15 min before the ice bath was removed and replaced with a –78 °C bath (dry ice/acetone).  $\beta$ -Iodoenone **SI-2**<sup>6</sup> (2.00 g, 9.09 mmol, 1.00 equiv) was transferred via cannula to the flask using several THF rinses (1 x 14 mL and 2 x 5 mL rinses, total added = 60 mL, 0.15 M), producing a yellow solution that transitioned to red over time. The reaction was stirred for one hour before allyl cyanoformate (1.12 mL, 10.38 mmol, 1.14 equiv) was added dropwise. After 2.25 hours, the reaction was quenched with sat.  $\text{NH}_4\text{Cl}$  solution and allowed to warm to room temperature. The reaction contents were transferred to a separatory funnel where the aqueous phase was extracted four times with  $\text{Et}_2\text{O}$ . The combined organics were dried over  $\text{MgSO}_4$ , filtered, and concentrated under reduced pressure. The resulting crude oil was filtered through a short silica gel plug to afford an orange oil.

A 50 mL round-bottom flask equipped with a magnetic stir bar was cycled into a glove box (4 x 1 min cycles) and loaded with sodium hydride (161.0 mg, 95% by weight, 6.37 mmol, 1.21

equiv). The flask was removed from the glove box, reconnected to an Ar-filled manifold, and charged with THF (6 mL). The crude orange oil from the previous step (1.61 g, 5.27 mmol, 1.00 equiv) was transferred via cannula to the flask using several THF rinses (1 x 5 mL + 3 x 2 mL, total added = 21.0 mL, 0.25 M). The grey suspension bubbled and became a yellow solution that transitioned to red over time. The reaction was stirred for 30 min before methyl iodide (400  $\mu$ L, 6.43 mmol, 1.22 equiv) was added dropwise. After 3.5 hours, the reaction was quenched with water and extracted four times with dichloromethane. The combined organics were dried over  $\text{MgSO}_4$ , filtered, and concentrated under reduced pressure. The resulting crude oil was purified by flash column chromatography ( $\text{SiO}_2$ , 28.5 x 4 cm, 100% hexanes $\rightarrow$ 5% EtOAc in hexanes) to afford  $\beta$ -Iodoenone **SI-3** (536.3 mg, 1.68 mmol, 18% yield over two steps) as a yellow oil;  $R_f$  = 0.72 (30% EtOAc in hexanes);  $^1\text{H}$  NMR (500 MHz,  $\text{CDCl}_3$ )  $\delta$  6.81 (dd,  $J$  = 2.2, 1.2 Hz, 1H), 5.94–5.79 (m, 1H), 5.32–5.26 (m, 1H), 5.24 (dt,  $J$  = 10.5, 1.1 Hz, 1H), 4.67–4.56 (m, 2H), 3.05–2.96 (m, 1H), 2.93–2.85 (m, 1H), 2.43 (dt,  $J$  = 13.8, 4.9 Hz, 1H), 1.95 (ddd,  $J$  = 14.0, 9.0, 5.3 Hz, 1H), 1.39 (s, 3H);  $^{13}\text{C}$  NMR (125 MHz,  $\text{CDCl}_3$ )  $\delta$  192.6, 171.7, 139.6, 131.6, 125.5, 118.8, 66.1, 52.7, 38.6, 35.0, 20.3; IR (Neat Film NaCl) 3084, 2982, 2936, 2868, 1732, 1682, 1597, 1455, 1424, 1378, 1333, 1295, 1246, 1169, 1098, 1033, 986, 926, 852, 770, 737  $\text{cm}^{-1}$ ; HRMS (MM: ESI-APCI+)  $m/z$  calc'd for  $\text{C}_{11}\text{H}_{14}\text{O}_3\text{I}$   $[\text{M}+\text{H}]^+$ : 320.9982, found 320.9981.

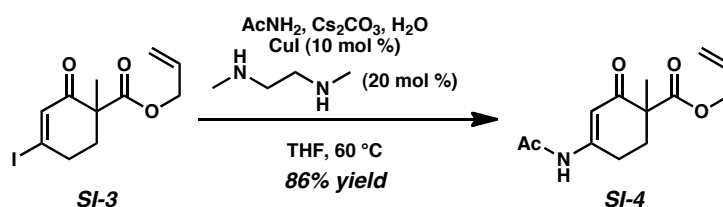

**Enaminone SI-4.** Adapted from procedure by Buchwald.<sup>7</sup>  $\text{CuI}$  (24 mg, 0.13 mmol, 0.10 equiv),  $\text{Cs}_2\text{CO}_3$  (624 mg, 1.92 mmol, 1.50 equiv) and acetamide (91 mg, 1.5 mmol, 1.2 equiv) were added to a 25 mL Schlenk bomb equipped with a stir bar under argon atmosphere. The Schlenk bomb was evacuated and backfilled with argon three times. A solution of vinyl iodide **SI-3** (409 mg, 1.28 mmol, 1.00 equiv),  $N,N'$ -dimethylethylenediamine (23 mg, 0.26 mmol, 0.20 equiv) and nanopure water (23 mg, 1.3 mmol, 1.0 equiv) in THF (2.6 mL, 0.5 M) was added via syringe. The reaction flask was lowered into a 60  $^\circ\text{C}$  oil bath. After 12 h of stirring, TLC analysis indicated complete conversion of starting material. The reaction was subsequently diluted with 15 mL  $\text{CH}_2\text{Cl}_2$ , transferred to a separatory funnel and washed twice with 5% aqueous  $\text{NH}_4\text{OH}$  (10 mL). The combined aqueous layers were extracted twice with  $\text{CH}_2\text{Cl}_2$  (15 mL). The combined organics were washed with brine (20 mL), dried over  $\text{Na}_2\text{SO}_4$ , filtered, and concentrated under reduced pressure. The resulting crude oil was purified by flash chromatography ( $\text{SiO}_2$ , 12 x 3 cm, 20 $\rightarrow$ 33 $\rightarrow$ 50 $\rightarrow$ 67% EtOAc in hexanes) to afford enaminone **SI-4** (276 mg, 1.10 mmol, 86% yield) as a pale yellow oil;  $R_f$  = 0.10 (50% EtOAc in hexanes);  $^1\text{H}$  NMR (500 MHz,  $\text{CDCl}_3$ )  $\delta$  8.30 (s, 1H), 6.60 (s, 1H), 5.90–5.77 (m, 1H), 5.27 (dq,  $J$  = 17.2, 1.5 Hz, 1H), 5.19 (dq,  $J$  = 10.5, 1.2 Hz, 1H), 4.58 (dq,  $J$  = 5.6, 1.3 Hz, 2H), 2.78–2.64 (m, 1H), 2.62–2.43 (m, 1H), 2.54–2.45 (m, 1H), 2.11 (s, 3H), 2.02–1.83 (m, 1H), 1.39 (s, 3H);  $^{13}\text{C}$  NMR (125 MHz,  $\text{CDCl}_3$ )  $\delta$  197.6, 172.2, 169.7, 155.6, 131.5, 118.2, 109.9, 65.6, 52.1, 51.9, 31.6, 25.4, 24.8, 20.3; IR (Neat Film NaCl) 3299, 3135, 2937, 1728, 1626, 1520, 1456, 1426, 1370, 1259, 1220, 1184, 1114, 999, 939, 877  $\text{cm}^{-1}$ ; HRMS (MM: ESI-APCI+)  $m/z$  calc'd for  $\text{C}_{13}\text{H}_{18}\text{NO}_4$   $[\text{M}+\text{H}]^+$ : 252.1230, found 252.1219.

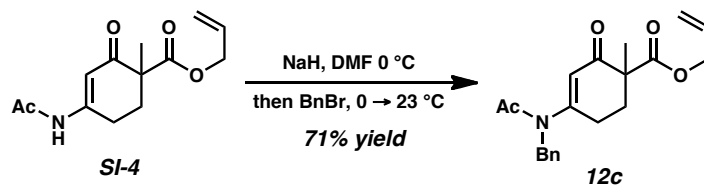

**Enaminone 12c.** In a 5 mL round bottom flask equipped with a stir bar under nitrogen atmosphere, enaminone **SI-4** (63 mg, 0.25 mmol, 1.0 equiv) was taken up in dry DMF (2.8 mL, 0.089 M) and cooled to 0 °C with an ice/water bath. Sodium hydride (60% suspension in mineral oil, 12 mg, 0.30 mmol, 1.2 equiv) was added to the mixture, accompanied by the formation of bubbles. The reaction was stirred for one hour before the dropwise addition of benzyl bromide (36  $\mu$ L, 0.30 mmol, 1.2 equiv) by syringe. The reaction temperature was maintained at 0 °C for five hours before allowing the ice bath to gradually expire. After an additional six hours at 23 °C, TLC analysis indicated complete conversion of starting material. The reaction was subsequently diluted with EtOAc (10 mL) and sat.  $\text{NH}_4\text{Cl}$  sol. (10 mL) and transferred to a separatory funnel. The organic layer was separated from the aqueous layer, and the aqueous layer was extracted twice with EtOAc (2 x 10 mL). The combined organics were washed with brine (15 mL), dried over  $\text{MgSO}_4$ , filtered, and concentrated under reduced pressure. The resulting crude oil was purified by flash chromatography ( $\text{SiO}_2$ , 15 x 3 cm, 20% acetone in hexanes) to afford enaminone **12c** (61 mg, 0.18 mmol, 71% yield) as a yellow oil;  $^1\text{H}$  NMR (500 MHz,  $\text{CDCl}_3$ )  $\delta$  7.34–7.29 (m, 2H), 7.29–7.24 (m, 1H), 7.19–7.16 (m, 2H), 5.87–5.79 (m, 1H), 5.78 (s, 1H), 5.27 (dt,  $J = 17.2, 1.4$  Hz, 1H), 5.21 (dt,  $J = 10.5, 1.3$  Hz, 1H), 4.89–4.84 (m, 1H), 4.78–4.72 (m, 1H), 4.56 (dt,  $J = 5.7, 1.3$  Hz, 2H), 2.58 (ddd,  $J = 9.3, 4.9, 1.6$  Hz, 1H), 2.56–2.48 (m, 1H), 2.44 (dtd,  $J = 13.8, 4.8, 1.2$  Hz, 1H), 2.16 (s, 3H), 1.87–1.78 (m, 1H), 1.36 (s, 3H);  $^{13}\text{C}$  NMR (125 MHz,  $\text{CDCl}_3$ )  $\delta$  196.2, 172.0, 170.0, 160.8, 136.5, 131.6, 129.0, 127.9, 127.5, 123.8, 119.0, 66.1, 52.6, 50.8, 32.8, 27.3, 23.2, 20.2; IR (Neat Film NaCl) 3063, 3030, 2981, 2937, 2873, 1731, 1667, 1624, 1496, 1454, 1424, 1387, 1375, 1344, 1312, 1250, 1190, 1113, 1029, 986, 948, 882, 738  $\text{cm}^{-1}$ ; HRMS (MM: ESI-APCI+)  $m/z$  calc'd for  $\text{C}_{20}\text{H}_{24}\text{O}_4\text{N}$   $[\text{M}+\text{H}]^+$ : 342.1700, found 342.1705.

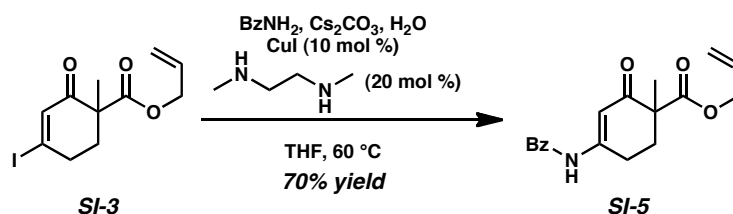

**Enaminone SI-5.** Adapted from procedure by Buchwald.<sup>7</sup> Prepared from **SI-3** in an analogous manner to **SI-4**. Purified by flash chromatography ( $\text{SiO}_2$ , 12 x 3 cm, 20→33→50% EtOAc in hexanes) to afford enaminone **SI-5** (220 mg, 0.702 mmol, 70% yield) as a pale yellow oil that solidified to a pale yellow amorphous solid upon standing at -20 °C;  $R_f = 0.10$  (50% EtOAc in hexanes);  $^1\text{H}$  NMR (500 MHz,  $\text{CDCl}_3$ )  $\delta$  8.31 (s, 1H), 7.83 – 7.74 (m, 2H), 7.56–7.47 (m, 1H), 7.47–7.40 (m, 2H), 6.70 (s, 1H), 5.88–5.75 (m, 1H), 5.25 (dq,  $J = 17.2, 1.6$  Hz, 1H), 5.17 (dq,  $J = 10.5, 1.4$  Hz, 1H), 4.55 (dq,  $J = 5.5, 1.5$  Hz, 2H), 2.92–2.82 (m, 1H), 2.79–2.69 (m, 1H), 2.53 (dt,  $J = 13.7, 5.4$  Hz, 1H), 1.99–1.87 (m, 1H), 1.38 (s, 3H);  $^{13}\text{C}$  NMR (125 MHz,  $\text{CDCl}_3$ )  $\delta$  197.2, 172.5, 166.5, 155.6, 133.8, 132.7, 131.7, 128.9, 127.5, 118.4, 111.1, 65.8, 52.3, 32.0, 25.9, 20.5; IR (Neat Film NaCl) 3334, 2936, 1732, 1694, 1621, 1514, 1492, 1376, 1258, 1185, 1115, 1071, 1023, 931, 710  $\text{cm}^{-1}$ ; HRMS (MM: ESI-APCI+)  $m/z$  calc'd for  $\text{C}_{18}\text{H}_{20}\text{NO}_4$   $[\text{M}+\text{H}]^+$ : 314.1387, found 314.1381.

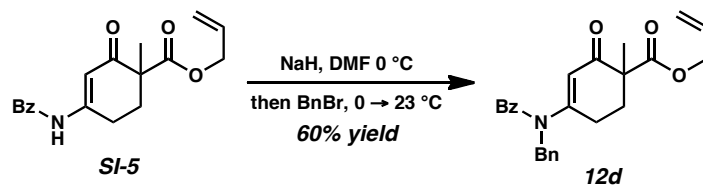

**Enaminone 12d.** Prepared from **SI-5** in an analogous manner to **12c**. Purified by flash chromatography ( $\text{SiO}_2$ , 15 x 3 cm, 20% acetone in hexanes) to afford enaminone **12d** (134 mg, 0.332 mmol, 60% yield) as a yellow oil;  $R_f = 0.63$  (50% EtOAc in hexanes);  $^1\text{H NMR}$  (500 MHz,  $\text{CDCl}_3$ )  $\delta$  7.65–7.55 (m, 2H), 7.52–7.43 (m, 1H), 7.43–7.37 (m, 2H), 7.36–7.26 (m, 5H), 5.84 (s, 1H), 5.83–5.71 (m, 1H), 5.28–5.15 (m, 2H), 5.10–4.98 (m, 2H), 4.58–4.38 (m, 2H), 2.38–2.26 (m, 1H), 2.26–2.13 (m, 2H), 1.56 (s, 6H), 1.24 (s, 3H);  $^{13}\text{C NMR}$  (125 MHz,  $\text{CDCl}_3$ )  $\delta$  195.9, 171.8, 171.0, 161.8, 136.8, 136.0, 131.8, 131.6, 128.9, 128.8, 128.2, 127.9, 127.7, 121.4, 118.5, 65.9, 52.8, 52.4, 32.6, 28.8, 20.2; IR (Neat Film NaCl) 2936, 1733, 1661, 1601, 1496, 1447, 1377, 1344, 1300, 1253, 1174, 1111, 974, 794, 724  $\text{cm}^{-1}$ ; HRMS (MM: ESI-APCI+)  $m/z$  calc'd for  $\text{C}_{25}\text{H}_{26}\text{NO}_4$   $[\text{M}+\text{H}]^+$ : 404.1856, found 404.1850.

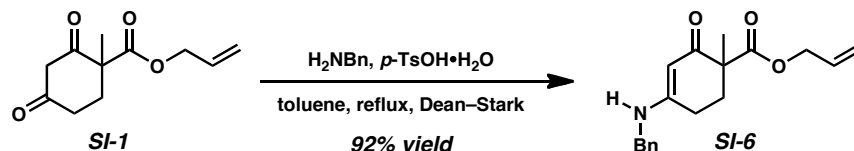

**Enaminone SI-6.** A 250 mL round-bottom flask containing a magnetic stir bar was charged with dione **SI-1** (1.89 g, 8.98 mmol, 1.00 equiv), toluene (90 mL, 0.10 M), benzylamine (1.1 mL, 10.04 mmol, 1.12 equiv), and *p*-toluenesulfonic acid monohydrate (169.0 mg, 0.89 mmol, 10 mol %). The flask was equipped with a Dean–Stark trap and water condenser and was lowered into a preheated oil bath (135 °C). After 5.5 h of refluxing, the solution was removed from the oil bath and allowed to cool to room temperature. The solution was quenched with a sat.  $\text{Na}_2\text{CO}_3$  solution (50 mL) and transferred to a separatory funnel where the aqueous layer was extracted once with  $\text{Et}_2\text{O}$  and three times with dichloromethane. The combined organics were dried over  $\text{MgSO}_4$ , filtered, and concentrated under reduced pressure. The crude oil was purified by flash column chromatography ( $\text{SiO}_2$ , 31 x 5 cm, 100% hexanes→20%→50% EtOAc in hexanes) to afford enaminone **SI-6** (2.48 g, 8.28 mmol, 92% yield) as a yellow solid;  $R_f = 0.27$  (30% EtOAc in hexanes);  $^1\text{H NMR}$  (500 MHz,  $\text{CDCl}_3$ )  $\delta$  7.40–7.30 (m, 3H), 7.29 (s, 2H), 5.95–5.82 (m, 1H), 5.30 (dq,  $J = 17.2, 1.6$  Hz, 1H), 5.22 (s, 1H), 5.20 (dq,  $J = 10.5, 1.4$  Hz, 1H), 4.62 (tt,  $J = 5.6, 1.5$  Hz, 2H), 4.56 (br s, 1H), 4.24 (d,  $J = 5.0$  Hz, 2H), 2.59 (ddd,  $J = 16.5, 8.8, 4.9$  Hz, 1H), 2.50 (ddd,  $J = 13.3, 6.2, 4.9$  Hz, 1H), 2.33 (dt,  $J = 16.6, 5.3$  Hz, 1H), 1.91 (ddd,  $J = 13.6, 8.8, 5.0$  Hz, 1H), 1.44 (s, 3H);  $^{13}\text{C NMR}$  (125 MHz,  $\text{CDCl}_3$ )  $\delta$  194.4, 173.4, 162.6, 136.7, 132.2, 129.1, 128.2, 128.0, 118.0, 96.7, 65.6, 52.1, 47.5, 32.4, 26.7, 21.1; IR (Neat Film NaCl) 3260, 3064, 2978, 2933, 2868, 1730, 1576, 1545, 1452, 1427, 1375, 1359, 1297, 1253, 1218, 1199, 1172, 1107, 1028, 987, 929, 822, 735  $\text{cm}^{-1}$ ; HRMS (GC-EI+)  $m/z$  calc'd for  $\text{C}_{18}\text{H}_{21}\text{NO}_3$   $[\text{M}+\bullet]^+$ : 299.1521, found 299.1522.

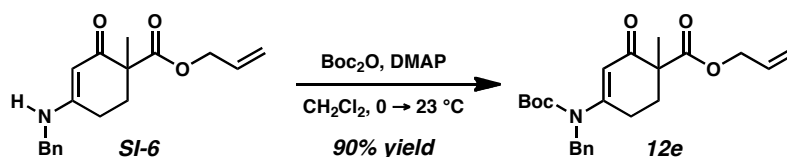

**Enaminone 12e.** A flame-dried 25 mL round-bottom flask containing a magnetic stir bar was loaded with enaminone **SI-6** (300.1 mg, 1.00 mmol, 1.00 equiv) and 4-dimethylaminopyridine (9.5 mg, 0.078 mmol, 7.8 mol %). The flask was charged with dichloromethane (10 mL, 0.10 M) and lowered into a 0 °C bath (ice/water). Di-*tert*-butyl dicarbonate (252.7 mg, 1.16 mmol, 1.15 equiv) was added and the solution transitioned from yellow to clear. The ice bath was allowed to expire as the reaction was stirred over night. After 22 h, the stir bar was removed from the flask, the reaction contents were concentrated under reduced pressure, and the resulting crude oil was purified by flash column chromatography (SiO<sub>2</sub>, 26.5 x 3 cm, 100% hexanes→5%→10%→15%→20% EtOAc in hexanes) to afford enaminone **12e** (360.0 mg, 0.90 mmol, 90% yield) as a pale yellow oil; *R<sub>f</sub>* = 0.79 (50% EtOAc in hexanes); <sup>1</sup>H NMR (500 MHz, CDCl<sub>3</sub>) δ 7.34–7.28 (m, 2H), 7.26–7.21 (m, 1H), 7.16–7.12 (m, 2H), 5.85 (dddd, *J* = 17.2, 10.5, 5.5, 5.5 Hz, 1H), 5.73 (t, *J* = 0.9 Hz, 1H), 5.27 (dq, *J* = 17.2, 1.6 Hz, 1H), 5.20 (dq, *J* = 10.5, 1.3 Hz, 1H), 4.80 (s, 2H), 4.58 (dddd, *J* = 5.6, 2.8, 1.5, 1.5 Hz, 2H), 2.92–2.77 (m, 2H), 2.45 (dt, *J* = 13.5, 5.3 Hz, 1H), 1.86 (ddd, *J* = 13.5, 7.7, 5.7 Hz, 1H), 1.42 (s, 9H), 1.38 (s, 3H); <sup>13</sup>C NMR (125 MHz, CDCl<sub>3</sub>) δ 196.8, 172.6, 162.2, 152.9, 137.2, 131.9, 128.8, 127.5, 126.3, 118.3, 114.8, 83.0, 65.8, 53.0, 52.5, 33.6, 28.1, 27.5, 20.4; IR (Neat Film NaCl) 3090, 3064, 3034, 2978, 2935, 2873, 1718, 1662, 1654, 1595, 1497, 1453, 1425, 1369, 1344, 1317, 1300, 1248, 1210, 1150, 1113, 1029, 989, 937, 856, 815, 769, 737 cm<sup>-1</sup>; HRMS (MM: ESI-APCI+) *m/z* calc'd for C<sub>23</sub>H<sub>30</sub>NO<sub>5</sub> [M+H]<sup>+</sup>: 400.2118, found 400.2127.

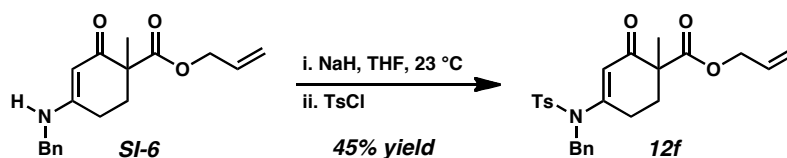

**Enaminone 12f.** A flame-dried 25 mL round-bottom flask containing a magnetic stir bar was cycled into a glove box and loaded with sodium hydride (95% by weight, 32.6 mg, 1.29 mmol, 1.29 equiv). The flask was removed from the glove box, reconnected to an Ar-filled manifold, and charged with THF (6 mL). Enaminone **SI-6** (300.3 mg, 1.00 mmol, 1.00 equiv) was added in one portion and the grey suspension bubbled and became a yellow solution over time. The flask was rinsed with additional THF (4 mL, 10 mL total, 0.10 M). The reaction was stirred vigorously for 70 min before *p*-toluenesulfonyl chloride (287.6 mg, 1.51 mmol, 1.50 equiv) was added in one portion. After 6 h, the flask was lowered into a 0 °C bath (ice/water) and quenched with water (reaction bubbled). The mixture was transferred to a separatory funnel where the aqueous layer was extracted four times with CH<sub>2</sub>Cl<sub>2</sub>. The combined organics (100 mL) were dried over MgSO<sub>4</sub>, filtered, and concentrated under reduced pressure. The crude oil was purified by flash column chromatography (SiO<sub>2</sub>, 27 x 3 cm, 100% hexanes→5%→10%→15%→50% EtOAc in hexanes) to afford enaminone **12f** (203.8 mg, 0.45 mmol, 45% yield) as a yellow oil; *R<sub>f</sub>* = 0.68 (30% EtOAc in hexanes); <sup>1</sup>H NMR (500 MHz, CDCl<sub>3</sub>) δ 7.69 (d, *J* = 8.3 Hz, 2H), 7.35 (d, *J* = 8.0 Hz, 2H), 7.33–7.25 (m, 3H), 7.23 (d, *J* = 6.6 Hz, 2H), 5.75 (dddd, *J* = 17.3, 10.8, 5.6, 5.6 Hz, 1H), 5.68 (t, *J* = 1.1 Hz, 1H), 5.24–5.15 (m, 2H), 4.81–4.69 (m, 2H), 4.48 (dddd, *J* = 13.5, 5.6, 1.4, 1.4 Hz, 1H), 4.40 (dddd, *J* = 13.2, 5.6, 1.4, 1.4 Hz, 1H), 2.67–2.55 (m, 2H), 2.46 (s, 3H), 2.32 (dt, *J* = 13.9, 5.2 Hz, 1H), 1.69 (ddd, *J* = 13.8, 8.0, 5.9 Hz, 1H), 1.22 (s, 3H); <sup>13</sup>C NMR (125 MHz, CDCl<sub>3</sub>) δ 196.0, 171.9, 158.4, 144.8, 135.6, 135.3, 131.7, 130.2, 128.9, 128.1,



127.6, 127.5, 119.5, 118.5, 65.9, 53.0, 52.2, 32.4, 27.9, 21.8, 20.0; IR (Neat Film NaCl) 3064, 3032, 2981, 2935, 2873, 1735, 1669, 1596, 1496, 1454, 1424, 1359, 1321, 1292, 1255, 1164, 1115, 1089, 1058, 1028, 984, 910, 883, 816, 773, 743  $\text{cm}^{-1}$ ; HRMS (MM: ESI-APCI+)  $m/z$  calc'd for  $\text{C}_{25}\text{H}_{28}\text{NSO}_5$   $[\text{M}+\text{H}]^+$ : 454.1683, found 454.1691.

### General Procedure for Screening Reactions *Enone 9a Screen Procedure*

$\text{Pd}_2(\text{dba})_3$  (2.4 mg, 0.00262 mmol, 0.05 equiv) and the appropriate PHOX ligand ((*S*)-*t*-BuPHOX (**3**): 2.5 mg, 0.00645 mmol, 0.125 equiv *or* (*S*)-(CF<sub>3</sub>)<sub>3</sub>-*t*-BuPHOX (**8**): 3.8 mg, 0.00643 mmol, 0.125 equiv) were added to an oven-dried 1 dram vial equipped with a magnetic stir bar. A separate oven-dried 1 dram vial was charged with enone **9a**<sup>8</sup> (10.0 mg, 0.0515 mmol, 1.00 equiv) and both vials were cycled into a nitrogen-filled glove box. The palladium/ligand vial was charged with solvent (THF, MTBE, toluene: 360  $\mu\text{L}$  or 2:1 hexanes/toluene: 120  $\mu\text{L}$  toluene and 340  $\mu\text{L}$  hexanes) and stirred at ambient glove box temperature. After 30 min, enone **9a** was transferred to the reaction vial with several solvent rinses (THF, MTBE, toluene: 3 x 400  $\mu\text{L}$ , 1.56 mL total, 0.033 M or 2:1 hexanes/toluene: 400  $\mu\text{L}$  toluene and 400  $\mu\text{L}$  + 300  $\mu\text{L}$  hexanes, 1.56 mL solvent total, 0.033 M). The vials were tightly sealed with a teflon lined cap and electrical tape, removed from the glove box, and lowered into a heating block set to 40 °C. After 2 days, the reaction were either loaded directly onto a column (toluene and 2:1 hexanes/toluene) or filtered through a celite plug and concentrated prior to chromatography (THF and MTBE). All reactions were purified by flash column chromatography (SiO<sub>2</sub>, ~22 x 1 cm, 2%→3% Et<sub>2</sub>O in pentane), resuspended in Et<sub>2</sub>O for analysis, and analyzed for enantiomeric excess with chiral GC. Characterization data for enone **13a** matches that previously reported.<sup>8</sup> As part of the screen, the yield was determined for enone **13a** with (*S*)-**8** in toluene (6.0 mg, 0.040 mmol, 78% yield).

### *Vinylogous Ester 10a and Enaminone Symyx Core Module Screen Procedure*

All reagents were dispensed as solutions using a Symyx Core Module within a nitrogen-filled glovebox. Oven-dried half-dram vials were charged with a solution of the palladium source ( $\text{Pd}_2(\text{dba})_3$ , 1.65  $\mu\text{mol}$ , 0.05 equiv) in THF (400  $\mu\text{L}$ ). The palladium solutions were evaporated to dryness under reduced pressure using a Genevac centrifugal evaporator within the glovebox, and stirbars were added to the vials. The reaction vials were then charged with a solution of the PHOX ligand (4.13  $\mu\text{mol}$ , 0.125 equiv) in the reaction solvent (300  $\mu\text{L}$ ) and stirred at 20 °C. After 30 min, a solution of vinylogous ester **10a** or the enaminone substrate (**12**, 33.0  $\mu\text{mol}$ , 1.0 equiv) in the reaction solvent (700  $\mu\text{L}$ ) were added. The reaction vials were tightly capped and heated to the desired temperature (40 °C). The consumption of the starting material was observed by colorimetric change (from light yellow/green to red/orange) and after 5 d, the reaction mixtures were removed from the glovebox, filtered through a short silica gel plug (rinsing with EtOAc), concentrated under reduced pressure, resuspended in an appropriate solvent for analysis (HPLC: hexanes *or* SFC: MeOH), and analyzed for enantiomeric excess (see Methods for the Determination of Enantiomeric Excess). Characterization data for vinylogous ester **14a** matches that previously reported.<sup>5</sup> Experimental procedures and characterization data for enaminones **15a-f** follows.

**Table SI-1.** Enaminone Allylic Alkylation Screen<sup>[a]</sup>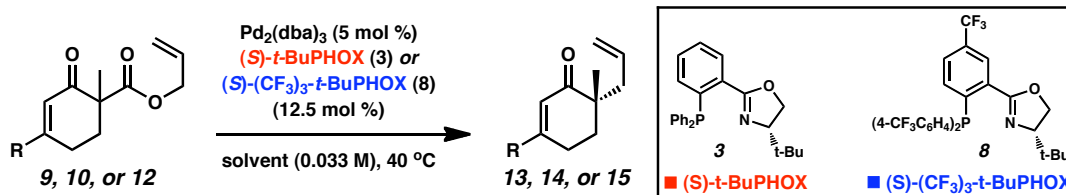

| entry | Substrate | R                       | Product | ligand | Enantiomeric Excess (% ee) <sup>[b]</sup> |      |         |             |
|-------|-----------|-------------------------|---------|--------|-------------------------------------------|------|---------|-------------|
|       |           |                         |         |        | THF                                       | MTBE | Toluene | 2:1 Hex-Tol |
| 1     | 9a        | H                       | 13a     | 3      | 87                                        | 88   | 87      | 87          |
| 2     |           |                         |         | 8      | 85                                        | 86   | 88      | 85          |
| 3     | 10a       | <i>O</i> - <i>i</i> -Bu | 14a     | 3      | 85                                        | 85   | 86      | 87          |
| 4     |           |                         |         | 8      | 86                                        | 86   | 86      | 88          |
| 5     | 12a       | NMe(Bn)                 | 15a     | 3      | 61                                        | 60   | 55      | 52          |
| 6     |           |                         |         | 8      | 79                                        | 78   | 84      | 83          |
| 7     | 12b       | NPh(Bn)                 | 15b     | 3      | 81                                        | 87   | 85      | 83          |
| 8     |           |                         |         | 8      | 76                                        | 74   | 82      | 83          |
| 9     | 12c       | NAc(Bn)                 | 15c     | 3      | 89                                        | 90   | 88      | 88          |
| 10    |           |                         |         | 8      | 83                                        | 85   | 88      | 86          |
| 11    | 12d       | NBz(Bn)                 | 15d     | 3      | 86                                        | 87   | 88      | 87          |
| 12    |           |                         |         | 8      | 80                                        | 83   | 82      | 83          |
| 13    | 12e       | NBoc(Bn)                | 15e     | 3      | 87                                        | 86   | 87      | 82          |
| 14    |           |                         |         | 8      | 84                                        | 84   | 81      | 83          |
| 15    | 12f       | NTs(Bn)                 | 15f     | 3      | 84                                        | 83   | 83      | 82          |
| 16    |           |                         |         | 8      | 82                                        | 83   | 83      | 83          |

[a] Conditions: enone **9a**, vinylogous ester **10a**, or enaminone **12a–f** (1.0 equiv),  $\text{Pd}_2(\text{dba})_3$  (5 mol %), and (*S*)-*t*-BuPHOX (**3**) or (*S*)-(CF<sub>3</sub>)<sub>3</sub>-*t*-BuPHOX (**8**) (12.5 mol %) in solvent (0.033 M) at 40 °C.

[b] Determined by chiral GC, HPLC, or SFC analysis. Red = with (*S*)-**3** as ligand and blue = with (*S*)-**8** as ligand.

### Enaminone Allylic Alkylation Products

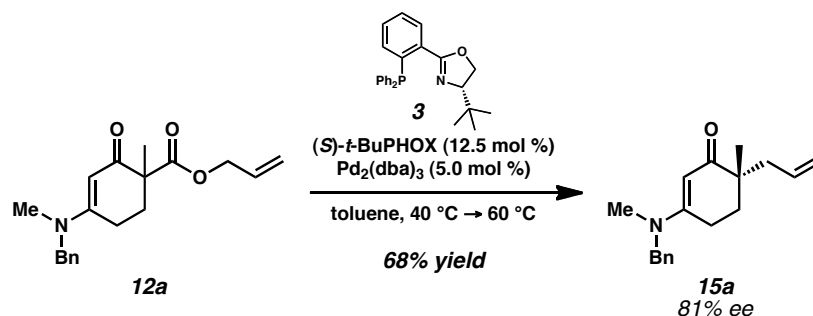

**Enaminone 15a.**  $\text{Pd}_2(\text{dba})_3$  (14.6 mg, 0.0159 mmol, 5.0 mol %) and (*S*)-*t*-BuPHOX (**3**, 15.5 mg, 0.0400 mmol, 12.5 mol %) were added to an oven-dried scintillation vial equipped with a magnetic stir bar and the vial was cycled into a glove box. The vial was charged with toluene (2 mL) and heated at 30 °C for 30 min, generating a red/orange solution. Enaminone **12a** (1 M in toluene, 320  $\mu\text{L}$ , 0.320 mmol, 1.00 equiv) and additional toluene (7.35 mL, total added = 9.67 mL, 0.033 M) were added, producing a green solution. The vial was sealed with a Teflon-lined cap, removed from the glove box, and lowered into a heating block (40 °C). After 5 days, the

temperature was raised to 60 °C and heated for an additional day before the reaction transitioned back to a red/orange solution. The reaction was filtered through a silica gel plug, rinsed with EtOAc, and concentrated under reduced pressure. The crude oil was purified twice by flash column chromatography (SiO<sub>2</sub>, 27.5 x 2 cm, 100% hexanes→20%→30%→50% EtOAc in hexanes→100% EtOAc *then* SiO<sub>2</sub>, 26.5 x 1.5 cm, 100% hexanes→20%→30%→40% EtOAc in hexanes) to afford enaminone **15a** (58.9 mg, 0.219 mmol, 68% yield) as a pale yellow oil;  $R_f$  = 0.12 (50% EtOAc in hexanes); <sup>1</sup>H NMR (500 MHz, CDCl<sub>3</sub>) δ 7.38–7.33 (m, 2H), 7.31–7.26 (m, 1H), 7.10 (d, *J* = 7.2 Hz, 2H), 5.84–5.74 (m, 1H), 5.17 (s, 1H), 5.07–5.00 (m, 2H), 4.51 (s, 2H), 2.95 (s, 3H), 2.58–2.44 (m, 2H), 2.38 (dddd, *J* = 13.7, 7.1, 1.2, 1.2 Hz, 1H), 2.23–2.18 (m, 1H), 1.93 (ddd, *J* = 13.2, 7.5, 5.5 Hz, 1H), 1.71 (ddd, *J* = 13.7, 6.9, 5.4 Hz, 1H), 1.09 (s, 3H); <sup>13</sup>C NMR (125 MHz, CDCl<sub>3</sub>) δ 201.2, 163.7, 136.9, 135.2, 129.1, 127.7, 126.3, 117.5, 98.1, 55.0, 42.1, 41.8, 38.5, 32.8, 24.0, 22.6; IR (Neat Film NaCl) 3066, 3029, 2958, 2926, 2867, 1728, 1615, 1557, 1495, 1451, 1412, 1373, 1354, 1333, 1315, 1297, 1276, 1253, 1204, 1156, 1103, 1077, 1029, 1001, 924, 823, 792, 733 cm<sup>-1</sup>; HRMS (EI+) *m/z* calc'd for C<sub>18</sub>H<sub>23</sub>ON [M+•]<sup>+</sup>: 269.1780, found 269.1782; [α]<sub>D</sub><sup>25.0</sup> -24.18 (c 1.04, CHCl<sub>3</sub>, 81% ee); JASCO SFC conditions: 5% MeOH in CO<sub>2</sub>, 5 mL/min, Chiralcel OD-H column, λ = 210 nm, t<sub>R</sub> (min): major = 10.45, minor = 9.60.

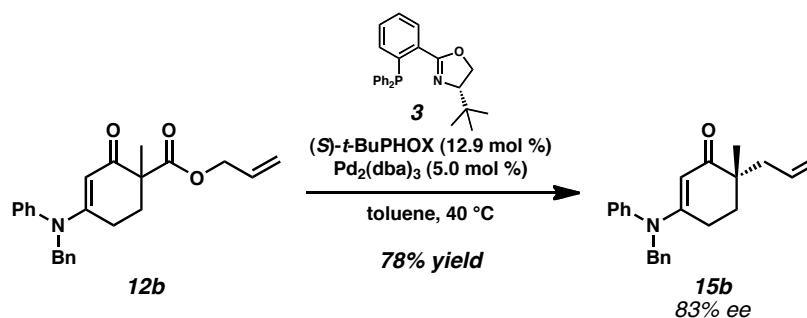

**Enaminone 15b.** Pd<sub>2</sub>(dba)<sub>3</sub> (3.5 mg, 0.00382 mmol, 5.0 mol %) and (S)-*t*-BuPHOX (**3**, 3.8 mg, 0.00981 mmol, 12.9 mol %) were added to an oven-dried scintillation vial equipped with a magnetic stir bar and the vial was cycled into a glove box. The vial was charged with toluene (0.5 mL) and heated at 30 °C for 30 min, generating a red/orange solution. Enaminone **12b** (28.6 mg, 0.0762 mmol, 1.00 equiv) was transferred to the flask with several toluene rinses (1 x 0.81 mL + 2 x 0.5 mL, total added = 2.31 mL, 0.033 M), producing a green solution. The vial was sealed with a Teflon-lined cap, removed from the glove box, and lowered into a heating block (40 °C). After 4 days, the reaction transitioned back to an orange solution. Subsequently, the reaction was filtered through a silica gel plug, rinsed with EtOAc, and concentrated under reduced pressure. The crude oil was purified twice by flash column chromatography (SiO<sub>2</sub>, 19.5 x 1.5 cm, 100% hexanes→50% EtOAc in hexanes→100% EtOAc *then* SiO<sub>2</sub>, 23.5 x 1 cm, 100% hexanes→10%→20%→30%→40% EtOAc in hexanes) to afford enaminone **15b** (19.7 mg, 0.0594 mmol, 78% yield) as a frosty colorless oil;  $R_f$  = 0.63 (50% EtOAc in hexanes); <sup>1</sup>H NMR (500 MHz, CDCl<sub>3</sub>) δ 7.37–7.33 (m, 2H), 7.33–7.29 (m, 2H), 7.29–7.22 (m, 2H), 7.22–7.18 (m, 2H), 7.15–7.11 (m, 2H), 5.76 (dddd, *J* = 15.8, 11.3, 7.8, 7.0 Hz, 1H), 5.29 (s, 1H), 5.05–5.00 (m, 2H), 4.83 (s, 2H), 2.38 (dddd, *J* = 13.8, 7.1, 1.3, 1.3 Hz, 1H), 2.35–2.31 (m, 2H), 2.19 (dddd, *J* = 13.7, 7.8, 1.1, 1.1 Hz, 1H), 1.90–1.83 (m, 1H), 1.65 (ddd, *J* = 13.5, 6.5, 5.6 Hz, 1H), 1.08 (s, 3H); <sup>13</sup>C NMR (125 MHz, CDCl<sub>3</sub>) δ 201.8, 163.3, 144.6, 136.7, 135.0, 129.8, 128.8, 128.0, 127.6, 127.5, 127.0, 117.6, 100.5, 56.7, 42.2, 42.0, 33.0, 25.5, 22.6; IR (Neat Film NaCl) 3063, 3031, 2959, 2926, 2863, 1622, 1563, 1494, 1453, 1426, 1404, 1374, 1351, 1329, 1275, 1204, 1156, 1078, 1060, 1028, 1002, 911, 830, 730 cm<sup>-1</sup>; HRMS (EI+) *m/z* calc'd for C<sub>23</sub>H<sub>26</sub>ON [M+H]<sup>+</sup>:

332.2009, found 332.1999;  $[\alpha]_D^{25.0} -29.79$  (c 1.91,  $\text{CHCl}_3$ , 83% ee); JASCO SFC conditions: 5% MeOH in  $\text{CO}_2$ , 5 mL/min, Chiralpak AS-H column,  $\lambda = 254$  nm,  $t_R$  (min): major = 8.60, minor = 6.48.

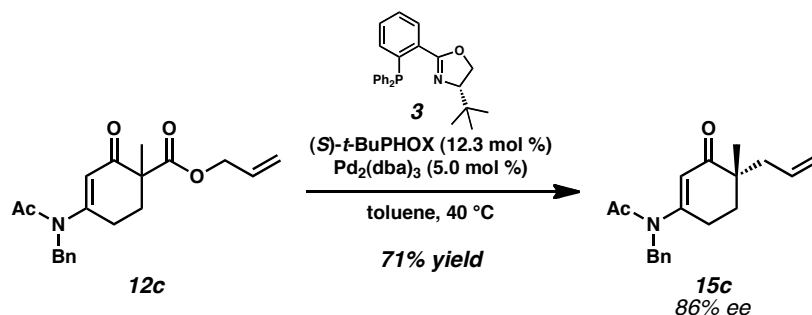

**Enaminone 15c.**  $\text{Pd}_2(\text{dba})_3$  (2.6 mg, 0.00284 mmol, 5.0 mol %) and  $(S)$ -*t*-BuPHOX (**3**, 2.7 mg, 0.00697 mmol, 12.3 mol %) were added to an oven-dried scintillation vial equipped with a magnetic stir bar and the vial was cycled into a glove box. The vial was charged with toluene (0.51 mL) and heated at 30 °C for 30 min, generating a red/orange solution. Enaminone **12c** (19.3 mg, 0.0565 mmol, 1.00 equiv) was transferred to the flask with several toluene rinses (4 x 0.3 mL, total added = 1.71 mL, 0.033 M), producing a yellow solution. The vial was sealed with a Teflon-lined cap, removed from the glove box, and lowered into a heating block (40 °C). After 2 days, the reaction transitioned back to an orange solution. Subsequently, the reaction was filtered through a silica gel plug, rinsed with EtOAc, and concentrated under reduced pressure. The crude oil was purified by flash column chromatography ( $\text{SiO}_2$ , 19.5 x 1.5 cm, 5% → 10% → 20% → 30% EtOAc in hexanes) to afford enaminone **15c** (12.0 mg, 0.0404 mmol, 71% yield) as a yellow oil;  $R_f = 0.46$  (50% EtOAc in hexanes);  $^1\text{H}$  NMR (500 MHz,  $\text{CDCl}_3$ )  $\delta$  7.32 (ddt,  $J = 8.1, 6.7, 1.2$  Hz, 2H), 7.30–7.23 (m, 1H), 7.19 (ddt,  $J = 7.3, 1.4, 0.7$  Hz, 2H), 5.68 (t,  $J = 1.3$  Hz, 1H), 5.66 (ddt,  $J = 16.9, 10.1, 7.3$  Hz, 1H), 5.05 (ddt,  $J = 10.1, 1.9, 0.9$  Hz, 1H), 4.99 (ddt,  $J = 17.0, 2.1, 1.4$  Hz, 1H), 4.81 (s, 2H), 2.50–2.39 (m, 2H), 2.21 (ddt,  $J = 13.8, 7.3, 1.2$  Hz, 1H), 2.17 (s, 3H), 2.10 (ddt,  $J = 13.8, 7.5, 1.1$  Hz, 1H), 1.87 (dt,  $J = 13.8, 5.9$  Hz, 1H), 1.69 (ddd,  $J = 13.8, 6.6, 5.7$  Hz, 1H), 1.01 (s, 3H);  $^{13}\text{C}$  NMR (125 MHz,  $\text{CDCl}_3$ )  $\delta$  203.1, 169.7, 160.1, 136.6, 133.6, 128.9, 127.9, 127.7, 123.8, 118.6, 50.9, 43.6, 40.8, 32.6, 27.1, 23.2, 21.5; IR (Neat Film NaCl) 3066, 2926, 2854, 1663, 1624, 1496, 1453, 1387, 1371, 1189, 991, 916  $\text{cm}^{-1}$ ; HRMS (FAB+)  $m/z$  calc'd for  $\text{C}_{19}\text{H}_{24}\text{NO}_2$   $[\text{M}+\text{H}]^+$ : 298.1807, found 298.1794;  $[\alpha]_D^{25.0} -14.12$  (c 1.20,  $\text{CHCl}_3$ , 86% ee); Thar SFC conditions: 5% MeOH in  $\text{CO}_2$ , 3 mL/min, Chiralpak AD-H column,  $\lambda = 254$  nm,  $t_R$  (min): major = 8.45, minor = 10.35.

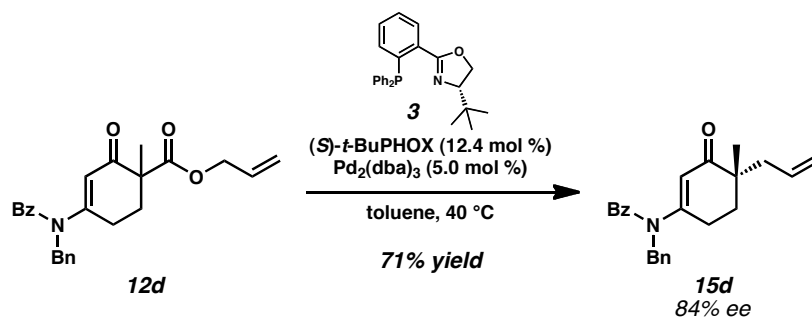

**Enaminone 12d.**  $\text{Pd}_2(\text{dba})_3$  (4.6 mg, 0.00502 mmol, 5.0 mol %) and  $(S)$ -*t*-BuPHOX (**3**, 4.8 mg, 0.0124 mmol, 12.4 mol %) were added to an oven-dried scintillation vial equipped with a magnetic stir bar and the vial was cycled into a glove box. The vial was charged with toluene

(0.93 mL) and heated at 30 °C for 30 min, generating a red/orange solution. Enaminone **12d** (1 M in toluene, 100  $\mu$ L, 0.100 mmol, 1.00 equiv) was transferred to the flask with more toluene (1 mL, total added including enaminone solution = 3.03 mL, 0.033 M), producing a yellow/orange solution. The vial was sealed with a Teflon-lined cap, removed from the glove box, and lowered into a heating block (40 °C). After 2 days, the reaction transitioned back to an orange solution. Subsequently, the reaction was filtered through a silica gel plug, rinsed with EtOAc, and concentrated under reduced pressure. The crude oil was purified by flash column chromatography (SiO<sub>2</sub>, 19.5 x 1.5 cm, 5%→10%→15% EtOAc in hexanes) to afford enaminone **15d** (26.3 mg, 0.0713 mmol, 71% yield, 95% purity) as a yellow oil;  $R_f$  = 0.57 (30% EtOAc in hexanes); <sup>1</sup>H NMR (500 MHz, CDCl<sub>3</sub>)  $\delta$  7.63–7.59 (m, 2H), 7.50–7.43 (m, 1H), 7.39 (ddt,  $J$  = 8.2, 6.6, 1.1 Hz, 2H), 7.35–7.29 (m, 4H), 7.29–7.25 (m, 1H), 5.74 (t,  $J$  = 1.1 Hz, 1H), 5.54 (ddt,  $J$  = 17.3, 10.1, 7.4 Hz, 1H), 5.09 (d,  $J$  = 15.3 Hz, 1H), 5.00 (d,  $J$  = 15.3 Hz, 1H), 4.98 (dm,  $J$  = 9.9 Hz, 1H), 4.86 (dm,  $J$  = 17.0 Hz, 1H), 2.11–2.08 (m, 2H), 2.03 (dd,  $J$  = 14.2, 7.9 Hz, 1H), 1.95 (ddt,  $J$  = 13.8, 7.3, 1.2 Hz, 1H), 1.59 (ddd,  $J$  = 13.7, 6.5, 5.4 Hz, 1H), 1.41 (ddd,  $J$  = 13.4, 6.8, 5.3 Hz, 1H), 0.88 (s, 3H); <sup>13</sup>C NMR (125 MHz, CDCl<sub>3</sub>)  $\delta$  202.7, 170.8, 160.9, 136.8, 136.2, 133.6, 131.6, 128.9, 128.7, 128.1, 128.0, 127.9, 122.3, 118.4, 52.5, 43.3, 40.6, 32.4, 28.4, 21.3; IR (Neat Film NaCl) 3063, 3030, 2961, 2928, 2855, 1655, 1610, 1496, 1447, 1384, 1374, 1347, 1324, 1273, 1189, 1140, 1076, 1028, 1001, 974, 919, 792 cm<sup>-1</sup>; HRMS (FAB+)  $m/z$  calc'd for C<sub>24</sub>H<sub>26</sub>NO<sub>2</sub> [M+H]<sup>+</sup>: 360.1964, found 360.1956; [ $\alpha$ ]<sub>D</sub><sup>25.0</sup> -26.61 (c 1.87, CHCl<sub>3</sub>, 84% ee); Thar SFC conditions: 7% MeOH in CO<sub>2</sub>, 2.5 mL/min, Chiralpak AD-H column,  $\lambda$  = 254 nm,  $t_r$  (min): major = 18.14, minor = 20.28.

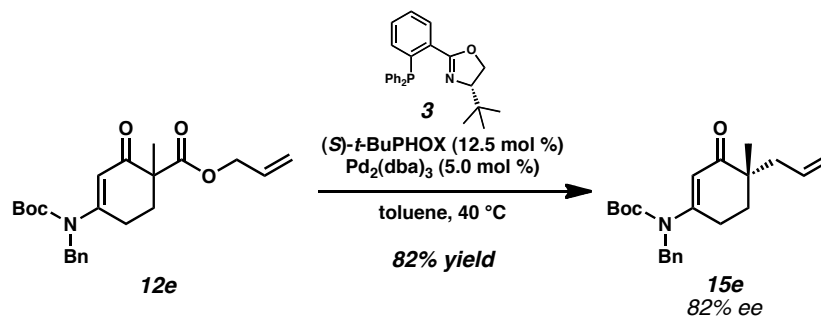

**Enaminone 15e.** Pd<sub>2</sub>(dba)<sub>3</sub> (11.5 mg, 0.0126 mmol, 5.0 mol %) and (S)-t-BuPHOX (**3**, 12.1 mg, 0.0312 mmol, 12.5 mol %) were added to an oven-dried scintillation vial equipped with a magnetic stir bar and the vial was cycled into a glove box. The vial was charged with toluene (2 mL) and heated at 30 °C for 30 min, generating a red/orange solution. Enaminone **12e** (1 M in toluene, 250  $\mu$ L, 0.250 mmol, 1.00 equiv) and additional toluene (6.34 mL, total added = 7.59 mL, 0.033 M) were added, producing a green solution. The vial was sealed with a Teflon-lined cap, removed from the glove box, and lowered into a heating block (40 °C). After 2 days, the reaction transitioned back to an orange solution. Subsequently, the reaction was filtered through a silica gel plug, rinsed with EtOAc, and concentrated under reduced pressure. The crude oil was purified by flash column chromatography (SiO<sub>2</sub>, 28 x 3 cm, 100% hexanes→5%→10% EtOAc in hexanes) to afford enaminone **15e** (72.6 mg, 0.204 mmol, 82% yield) as a pale yellow oil;  $R_f$  = 0.65 (30% EtOAc in hexanes); <sup>1</sup>H NMR (500 MHz, CDCl<sub>3</sub>)  $\delta$  7.33–7.29 (m, 2H), 7.26–7.22 (m, 1H), 7.17–7.14 (m, 2H), 5.69 (dddd,  $J$  = 16.8, 10.2, 7.4, 7.4 Hz, 1H), 5.63 (t,  $J$  = 0.9 Hz, 1H), 5.07–4.99 (m, 2H), 4.78 (s, 2H), 2.75 (tm,  $J$  = 6.1 Hz, 2H), 2.29 (dddd,  $J$  = 13.7, 7.3, 1.2, 1.2 Hz, 1H), 2.13 (dddd,  $J$  = 13.7, 7.5, 1.2, 1.2 Hz, 1H), 1.90–1.84 (m, 1H), 1.71–1.65 (m, 1H), 1.43 (s, 9H), 1.04 (s, 3H); <sup>13</sup>C NMR (125 MHz, CDCl<sub>3</sub>)  $\delta$  203.6, 161.6, 153.0, 137.4, 134.1, 128.8, 127.4, 126.4, 118.2, 115.4, 82.6, 52.9, 43.2, 41.2, 33.5, 28.2, 27.2, 21.9; IR (Neat

Film NaCl) 3066, 3031, 3004, 2976, 2931, 2868, 1716, 1656, 1598, 1497, 1455, 1428, 1382, 1368, 1350, 1326, 1302, 1243, 1209, 1192, 1153, 1076, 1030, 998, 946, 916, 858, 779, 767, 734  $\text{cm}^{-1}$ ; HRMS (MM: ESI-APCI+)  $m/z$  calc'd for  $\text{C}_{22}\text{H}_{30}\text{O}_3\text{N}$   $[\text{M}+\text{H}]^+$ : 356.2229, found 356.2220;  $[\alpha]_{\text{D}}^{25.0}$   $-23.61$  (c 0.92,  $\text{CHCl}_3$ , 82% ee); JASCO SFC conditions: 7% MeOH in  $\text{CO}_2$ , 5 mL/min, Chiralpak AD-H column,  $\lambda = 210$  nm,  $t_{\text{R}}$  (min): major = 4.04, minor = 2.20.

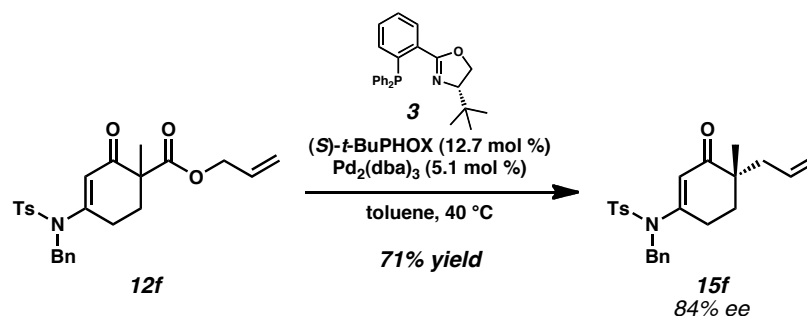

**Enaminone 15f.**  $\text{Pd}_2(\text{dba})_3$  (10.2 mg, 0.0111 mmol, 5.1 mol %) and  $(S)$ -*t*-BuPHOX (**3**, 10.8 mg, 0.0279 mmol, 12.7 mol %) were added to an oven-dried scintillation vial equipped with a magnetic stir bar and the vial was cycled into a glove box. The vial was charged with toluene (2 mL) and heated at 30 °C for 30 min, generating a red/orange solution. Enaminone **12f** (1 M in toluene, 220  $\mu\text{L}$ , 0.220 mmol, 1.00 equiv) and additional toluene (5.46 mL, total added = 6.68 mL, 0.033 M) were added, producing a green solution. The vial was sealed with a Teflon-lined cap, removed from the glove box, and lowered into a heating block (40 °C). After 2 days, the reaction transitioned back to an orange solution. Subsequently, the reaction was filtered through a silica gel plug, rinsed with EtOAc, and concentrated under reduced pressure. The crude oil was purified by flash column chromatography ( $\text{SiO}_2$ , 27 x 2 cm, 100% hexanes  $\rightarrow$  5%  $\rightarrow$  10%  $\rightarrow$  15% EtOAc in hexanes) to afford enaminone **15f** (64.1 mg, 0.157 mmol, 71% yield) as a pale yellow oil;  $R_f = 0.55$  (30% EtOAc in hexanes);  $^1\text{H}$  NMR (500 MHz,  $\text{CDCl}_3$ )  $\delta$  7.70 (dm,  $J = 8.3$  Hz, 2H), 7.35 (dm,  $J = 8.6$  Hz, 2H), 7.33–7.26 (m, 3H), 7.25–7.22 (m, 2H), 5.60–5.50 (m, 2H), 4.98 (dm,  $J = 10.2$  Hz, 1H), 4.86 (dm,  $J = 17.0$  Hz, 1H), 4.74 (d,  $J = 15.0$  Hz, 1H), 4.66 (d,  $J = 15.0$  Hz, 1H), 2.56–2.44 (m, 2H), 2.46 (s, 3H), 1.99–1.86 (m, 2H), 1.70 (ddd,  $J = 13.9, 6.6, 5.3$  Hz, 1H), 1.55 (ddd,  $J = 13.9, 7.2, 5.5$  Hz, 1H), 0.85 (s, 3H);  $^{13}\text{C}$  NMR (125 MHz,  $\text{CDCl}_3$ )  $\delta$  202.9, 157.74, 144.7, 135.4, 135.3, 133.7, 130.1, 128.9, 128.1, 127.9, 127.5, 120.7, 118.3, 53.1, 43.2, 40.6, 32.2, 27.9, 21.8, 21.3; IR (Neat Film NaCl) 3066, 3027, 2963, 2928, 2868, 1663, 1654, 1597, 1496, 1453, 1424, 1355, 1306, 1164, 1089, 1055, 1028, 1001, 912, 859, 814, 745  $\text{cm}^{-1}$ ; HRMS (MM: ESI-APCI+)  $m/z$  calc'd for  $\text{C}_{24}\text{H}_{28}\text{O}_3\text{NS}$   $[\text{M}+\text{H}]^+$ : 410.1784, found 410.1792;  $[\alpha]_{\text{D}}^{25.0}$   $-33.05$  (c 0.37,  $\text{CHCl}_3$ , 84% ee); JASCO SFC conditions: 10% MeOH, 5 mL/min, AD-H column,  $\lambda = 210$  nm,  $t_{\text{R}}$  (min): major = 5.60, minor = 4.73.

## Procedures for the Preparation of 2,3-Dihydropyridin-4-ones

### 2,3-Dihydropyridin-4-one Allylic Alkylation Precursors

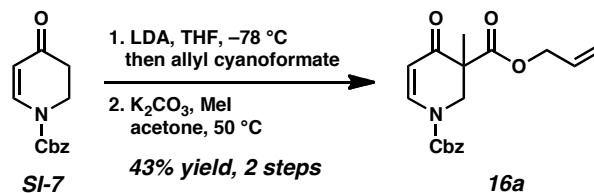

**2,3-Dihydropyridin-4-one 16a.** A 100 mL round-bottom flask equipped with a magnetic stir bar was charged with diisopropyl amine (442  $\mu\text{L}$ , 3.01 mmol, 1.20 equiv) and THF (28 mL). The flask was cooled to  $-78\text{ }^\circ\text{C}$  bath (Dry ice/IPA) and *n*-BuLi (1.30 mL, 3.01 mmol, 2.32 M in hexanes, 1.20 equiv) was added. The reaction was allowed to warm to  $0\text{ }^\circ\text{C}$  over 1 h. The solution was cooled back to  $-78\text{ }^\circ\text{C}$  and was added dropwise to a solution of 2,3-Dihydropyridin-4-one **SI-7**<sup>9</sup> (580 mg, 2.51 mmol, 1.0 equiv) in THF (40 mL) at  $-78\text{ }^\circ\text{C}$  using positive pressure cannulation. The reaction was stirred for 1 h at this temperature before allyl cyanoformate (300  $\mu\text{L}$ , 2.88 mmol, 1.15 equiv) was added dropwise. The flask was removed from the bath and allowed to warm to room temperature slowly and stirred overnight. The reaction was quenched with water and sat.  $\text{NH}_4\text{Cl}$  solution. The phases were separated and the aqueous phase was extracted three times with EtOAc. The combined organic layers were dried over  $\text{MgSO}_4$ , filtered, and concentrated under reduce pressure. The resulting yellow oil was purified by flash-chromatography (2:1  $\text{Et}_2\text{O}$ /hexanes).

The yellow oil was transferred to an argon filled 25 mL Schlenk tube equipped with a magnetic stir bar using several acetone rinses (3 x 2 mL).  $\text{K}_2\text{CO}_3$  (252 mg, 1.83 mmol, 2.0 equiv) and methyl iodide (115  $\mu\text{L}$ , 1.84 mmol, 2.02 equiv) were added to the reaction. The resulting suspension was heated to  $50\text{ }^\circ\text{C}$  and vigorously stirred for 14 h. Upon completion, the reaction was allowed to cool to room temperature and filtered through a plug of celite. The resulting yellow solution was concentrated under reduced pressure and purified by flash-chromatography (1:1  $\text{Et}_2\text{O}$ /hexanes) to afford 2,3-Dihydropyridin-4-one **16a** (210 mg, 0.64 mmol, 43% yield over two steps) as a yellow oil;  $R_f = 0.38$  (1:1  $\text{Et}_2\text{O}$ /hexanes);  $^1\text{H}$  NMR (500 MHz,  $\text{CDCl}_3$ )  $\delta$  7.83 (br s,  $J = 22.5$  Hz, 1H), 7.45–7.31 (m, 5H), 5.82 (ddt,  $J = 17.2, 10.4, 5.6$  Hz, 1H), 5.37 (br s, 1H), 5.27 (s, 2H), 5.26 (dq,  $J = 17.1, 1.5$  Hz, 1H), 5.20 (dq,  $J = 10.5, 1.3$  Hz, 1H), 4.64 (dd,  $J = 13.5, 0.9$  Hz, 1H), 4.59 (dt,  $J = 5.6, 1.5$  Hz, 2H), 3.63 (d,  $J = 13.5$  Hz, 1H), 1.40 (s, 3H);  $^{13}\text{C}$  NMR (125 MHz,  $\text{CDCl}_3$ )  $\delta$  190.9, 170.1, 152.5, 142.7, 134.8, 131.3, 128.8, 128.7, 128.4, 118.6, 106.2, 69.2, 66.1, 51.6, 50.5, 17.9; IR (Neat Film, NaCl) 3076, 3034, 2965, 2929, 2360, 2922, 1729, 1668, 1605, 1498, 1456, 1418, 1393, 1344, 1302, 1205, 1157, 1101, 1029, 966, 917, 814, 763  $\text{cm}^{-1}$ ; HRMS (MM: ESI/APCI+)  $m/z$  calc'd for  $\text{C}_{18}\text{H}_{19}\text{NO}_5$   $[\text{M}+\text{H}]^+$ : 330.1335, found 330.1335.

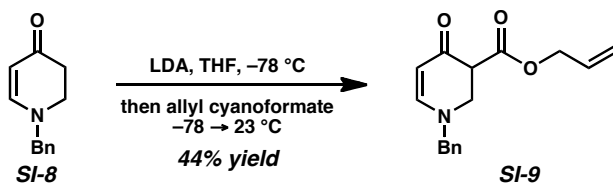

**2,3-Dihydropyridin-4-one SI-9.** To a flame-dried 50 mL Schlenk round-bottom flask equipped with a magnetic stir bar was added 2,3-Dihydropyridin-4-one **SI-8**<sup>10</sup> (162.0 mg, 0.87 mmol) and THF (10 mL). The solution was cooled to  $-78\text{ }^{\circ}\text{C}$  and LDA (0.1 M in THF, 9.10 mL, 0.91 mmol, 1.05 equiv) was added dropwise by syringe. After 1 h at  $-78\text{ }^{\circ}\text{C}$ , allyl cyanoformate (105.2 mg, 0.96 mmol, 1.10 equiv) was added, and the reaction mixture was stirred for another 3 h and quenched with a sat.  $\text{NH}_4\text{Cl}$  sol. The reaction was transferred to a separatory funnel where the aqueous layer was extracted with  $\text{CH}_2\text{Cl}_2$  (4 x 30 mL). The combined organics were washed with brine, dried over  $\text{MgSO}_4$ , filtered, and concentrated under reduced pressure. The resulting crude mixture was purified by flash chromatography ( $\text{SiO}_2$ , 10 x 2.5 cm, 30% EtOAc  $\rightarrow$  50% EtOAc in hexanes) to afford 2,3-Dihydropyridin-4-one **SI-9** (104.8 mg, 0.38 mmol, 44% yield) as a yellow oil;  $R_f = 0.30$  (50% EtOAc in hexanes);  $^1\text{H}$  NMR (500 MHz,  $\text{CDCl}_3$ )  $\delta$  7.45–7.31 (m, 3H), 7.28–7.23 (m, 2H), 7.17 (d,  $J = 7.5$  Hz, 1H), 5.87 (ddt,  $J = 17.2, 10.5, 5.7$  Hz, 1H), 5.32 (dq,  $J = 17.2, 1.5$  Hz, 1H), 5.22 (dq,  $J = 10.4, 1.3$  Hz, 1H), 5.06 (d,  $J = 7.5$  Hz, 1H), 4.69–4.55 (m, 2H), 4.40 (d,  $J = 2.5$  Hz, 2H), 3.76 (dd,  $J = 13.3, 8.7$  Hz, 1H), 3.51 (dd,  $J = 13.3, 5.9$  Hz, 1H), 3.40 (dd,  $J = 8.7, 5.9$  Hz, 1H);  $^{13}\text{C}$  NMR (125 MHz,  $\text{CDCl}_3$ )  $\delta$  185.2, 168.8, 153.6, 135.1, 131.6, 129.1, 128.5, 127.8, 118.6, 97.7, 66.0, 60.0, 50.5, 48.4; IR (Neat Film NaCl) 3029, 2935, 2853, 1732, 1641, 1588, 1494, 1455, 1393, 1361, 1321, 1204, 1154, 1078, 1028, 991, 967, 935, 78, 731  $\text{cm}^{-1}$ ; HRMS (MM: ESI-APCI+)  $m/z$  calc'd for  $\text{C}_{16}\text{H}_{18}\text{NO}_3$   $[\text{M}+\text{H}]^+$ : 272.1287, found 272.1314.

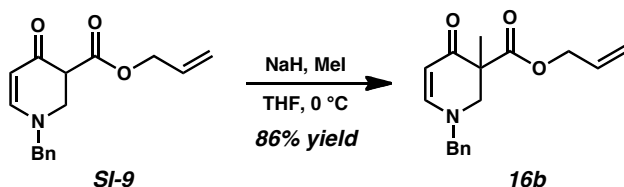

**2,3-Dihydropyridin-4-one 16b.** To a flame-dried 25 mL round-bottom flask equipped with a magnetic stir bar was cycled into a glove box (4 x 1 min cycles) and loaded with sodium hydride (9.3 mg, 0.39 mmol, 1.00 equiv). The flask was removed from the glove box, reconnected to an Ar-filled manifold, charged with THF (3 mL), and cooled to  $0\text{ }^{\circ}\text{C}$ . A solution of 2,3-Dihydropyridin-4-one **SI-9** (104.2 mg, 0.39 mmol, 1.00 equiv) was added by syringe and the mixture was stirred at  $0\text{ }^{\circ}\text{C}$  for 30 min. The reaction was quenched with water, transferred to a separatory funnel, and extracted four times with  $\text{CH}_2\text{Cl}_2$ . The combined organics were washed with brine, dried over  $\text{MgSO}_4$ , filtered, and concentrated under reduced pressure. The crude oil was purified by flash chromatography ( $\text{SiO}_2$ , 10 x 2.5 cm, 30% EtOAc in hexanes) to afford 2,3-Dihydropyridin-4-one **16b** (95.9 mg, 0.34 mmol, 86% yield) as a colorless oil;  $R_f = 0.40$  (50% EtOAc in hexanes);  $^1\text{H}$  NMR (500 MHz,  $\text{CDCl}_3$ )  $\delta$  7.43–7.30 (m, 3H), 7.25–7.20 (m, 2H), 7.13 (d,  $J = 7.4$  Hz, 1H), 5.83 (ddt,  $J = 17.1, 10.8, 5.5$  Hz, 1H), 5.27 (dq,  $J = 17.2, 1.6$  Hz, 1H), 5.19 (dq,  $J = 10.5, 1.3$  Hz, 1H), 5.01 (d,  $J = 7.4$  Hz, 1H), 4.56 (qdt,  $J = 13.4, 5.5, 1.5$  Hz, 2H), 4.46–4.30 (m, 2H), 3.78 (d,  $J = 13.2$  Hz, 1H), 3.15 (d,  $J = 13.3$  Hz, 1H), 1.30 (s, 3H);  $^{13}\text{C}$  NMR (125 MHz,  $\text{CDCl}_3$ )  $\delta$  189.0, 171.6, 152.7, 135.1, 131.7, 129.0, 128.0, 118.1, 97.0, 65.8, 60.0, 55.0, 51.2, 18.5; IR (Neat Film NaCl) 3029, 2979, 2934, 2871, 1732, 1642, 1592, 1494, 1455, 1393, 1372, 1359, 1343, 1295, 1223, 1166, 1115, 1028, 975, 937, 792, 732  $\text{cm}^{-1}$ ; HRMS (MM: ESI-APCI+)  $m/z$  calc'd for  $\text{C}_{17}\text{H}_{20}\text{NO}_3$   $[\text{M}+\text{H}]^+$ : 286.1443, found 286.1480.



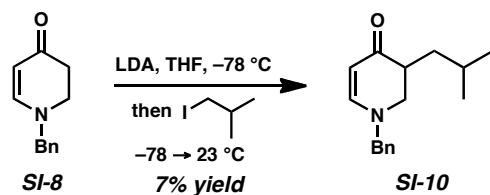

**2,3-Dihydropyridin-4-one SI-10.** To a flame-dried 100 mL Schlenk round-bottom flask equipped with a magnetic stir bar was added 2,3-Dihydropyridin-4-one **SI-8**<sup>10</sup> (0.68 g, 3.63 mmol) and THF (30 mL). The solution was cooled to  $-78\text{ }^\circ\text{C}$  and LDA (19.0 mL, 3.80 mmol, 1.05 equiv, 0.2 M in THF) was added dropwise by syringe. After 1 h at  $-78\text{ }^\circ\text{C}$ , 1-iodo-2-methylpropane (0.87 g, 4.73 mmol, 1.30 equiv) was added, and the reaction was stirred for another 1 h at  $-78\text{ }^\circ\text{C}$ , brought to room temperature, and stirred overnight. The reaction was quenched with a sat.  $\text{NH}_4\text{Cl}$  sol., transferred to a separatory funnel, and extracted with  $\text{CH}_2\text{Cl}_2$  (50 mL x 3). The combined organics were washed with brine, dried over  $\text{MgSO}_4$ , filtered, and concentrated. The crude mixture was purified by flash chromatography ( $\text{SiO}_2$ , 10 x 3 cm, 30% EtOAc in hexanes) to afford 2,3-Dihydropyridin-4-one **SI-10** (58.2 mg, 0.24 mmol, 7% yield) as a yellow oil;  $R_f = 0.50$  (50% EtOAc in hexanes);  $^1\text{H NMR}$  (500 MHz,  $\text{CDCl}_3$ )  $\delta$  7.46–7.32 (m, 3H), 7.29–7.25 (m, 2H), 7.12 (d,  $J = 7.4$  Hz, 1H), 4.96 (d,  $J = 7.4$  Hz, 1H), 4.43–4.28 (m, 2H), 3.38 (dd,  $J = 13.0, 5.4$  Hz, 1H), 3.08 (dd,  $J = 13.0, 7.7$  Hz, 1H), 2.29 (ddt,  $J = 10.1, 7.6, 5.2$  Hz, 1H), 1.56 (ddd,  $J = 14.0, 9.3, 5.0$  Hz, 1H), 1.43–1.34 (m, 1H), 1.18 (ddd,  $J = 13.7, 9.6, 5.3$  Hz, 1H), 0.82 (d,  $J = 6.5$  Hz, 3H), 0.78 (d,  $J = 6.6$  Hz, 2H);  $^{13}\text{C NMR}$  (125 MHz,  $\text{CDCl}_3$ )  $\delta$  195.0, 152.8, 135.8, 128.9, 128.3, 127.8, 97.7, 60.0, 50.4, 42.0, 37.5, 25.0, 23.3, 21.4; IR (Neat Film NaCl) 3029, 2954, 2868, 1633, 1593, 1494, 1463, 1455, 1385, 1361, 1302, 1210, 1161, 1077, 778, 730  $\text{cm}^{-1}$ ; HRMS (MM: ESI-APCI+)  $m/z$  calc'd for  $\text{C}_{16}\text{H}_{22}\text{NO}$   $[\text{M}+\text{H}]^+$ : 244.1701, found 244.1707.

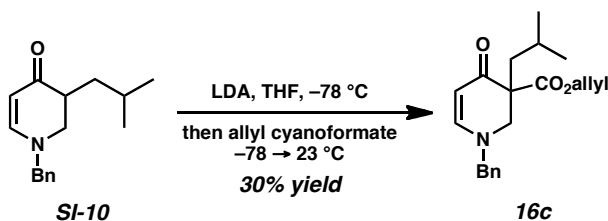

**2,3-Dihydropyridin-4-one 16c.** To a flame-dried 25 mL Schlenk tube equipped with a magnetic stir bar was added 2,3-Dihydropyridin-4-one **SI-10** (50.5 mg, 0.21 mmol) and THF (5 mL). After the solution was cooled to  $-78\text{ }^\circ\text{C}$ , LDA (2.2 mL, 0.22 mmol, 1.06 equiv, 0.1 M in THF) was added dropwise by syringe. The mixture was stirred for 1 h at  $-78\text{ }^\circ\text{C}$  and allyl cyanoformate (26.4 mg, 0.24 mmol, 1.20 equiv) was added. The reaction mixture was stirred for another 3 h and quenched with saturated  $\text{NH}_4\text{Cl}$  aqueous. The aqueous layer was extracted with  $\text{CH}_2\text{Cl}_2$  (30 mL x 4) and the combined organics were washed with brine, dried over  $\text{MgSO}_4$ , and concentrated. The crude mixture was purified by flash chromatography ( $\text{SiO}_2$ , 10 x 1 cm, 30% EtOAc in hexanes) to afford **16c** (19.8 mg, 0.06 mmol, 30% yield) as a yellow oil;  $R_f = 0.30$  (30% EtOAc in hexanes);  $^1\text{H NMR}$  (500 MHz,  $\text{CDCl}_3$ )  $\delta$  7.45–7.31 (m, 3H), 7.29–7.19 (m, 2H), 7.07 (d,  $J = 7.4$  Hz, 1H), 5.86 (ddt,  $J = 17.2, 10.4, 5.6$  Hz, 1H), 5.32 (dq,  $J = 17.2, 1.6$  Hz, 1H), 5.20 (dq,  $J = 10.5, 1.3$  Hz, 1H), 4.96 (d,  $J = 7.3$  Hz, 1H), 4.67–4.51 (m, 2H), 4.43 (s, 2H), 3.82 (d,  $J = 13.4$  Hz, 1H), 3.27 (d,  $J = 13.4$  Hz, 1H), 2.03 (dd,  $J = 14.2, 7.1$  Hz, 1H), 1.64–1.45 (m, 2H), 0.85 (d,  $J = 6.5$  Hz, 3H), 0.80 (d,  $J = 6.5$  Hz, 3H);  $^{13}\text{C NMR}$  (125 MHz,  $\text{CDCl}_3$ )  $\delta$  187.7, 170.9, 152.2, 135.1, 131.7, 129.0, 128.1, 118.4, 96.7, 65.8, 60.1, 54.4, 52.6, 40.4, 24.6, 24.3, 23.2; IR (Neat Film NaCl) 3029, 2957, 2870, 1729, 1644, 1593, 1455, 1360, 1267, 1215, 1159,

1132, 1077, 1029, 971, 778, 735  $\text{cm}^{-1}$ ; HRMS (MM: ESI-APCI+)  $m/z$  calc'd for  $\text{C}_{20}\text{H}_{26}\text{NO}_3$   $[\text{M}+\text{H}]^+$ : 328.1913, found 328.1947.

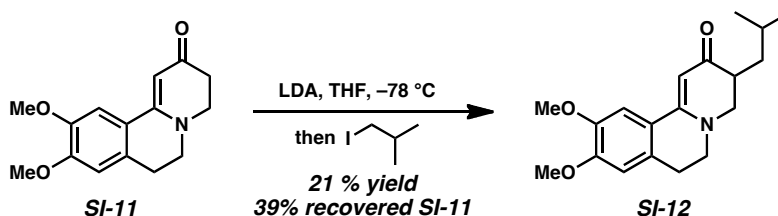

**2,3-Dihydropyridin-4-one SI-12.** To a cooled ( $-78\text{ }^\circ\text{C}$ ) solution of **SI-11**<sup>11</sup> (0.67 g, 2.6 mmol, 1 equiv) in THF (25 mL) was added LDA (30 mL, 0.1 M, in THF, 30 mmol, 1.15 equiv) dropwise over 10 min. The reaction was stirred for one hour before 1-iodo-2-methylpropane (0.57 g, 3.1 mmol, 1.20 equiv) was added dropwise. After 2 hours, the reaction mixture was brought to room temperature and stirred overnight. The reaction was quenched with sat.  $\text{NH}_4\text{Cl}$  sol. and transferred to a separatory funnel where the aqueous phase was extracted four times with  $\text{CH}_2\text{Cl}_2$ . The combined organics were washed with brine, dried over  $\text{MgSO}_4$ , filtered, and concentrated under reduced pressure. The resulting crude mixture purified by flash column chromatography ( $\text{SiO}_2$ , 15 x 3 cm, 50% EtOAc in hexanes  $\rightarrow$  100% EtOAc) to afford recovered **SI-11** (0.26 g, 1.01 mmol, 39% recovered) **SI-12** (0.17 g, 0.54 mmol, 21% yield) as a yellow solid;  $R_f = 0.20$  (50% EtOAc in hexanes). Spectral data matches that reported previously.<sup>12</sup> NMR data is included to assist the reader.  $^1\text{H}$  NMR (300 MHz,  $\text{CDCl}_3$ )  $\delta$  7.14 (s, 1H), 6.65 (s, 1H), 5.62 (s, 1H), 3.90 (s, 3H), 3.86 (s, 3H), 3.64 (dd,  $J = 12.5, 5.3$  Hz, 1H), 3.45–3.24 (m, 3H), 2.94 (td,  $J = 6.3, 3.5$  Hz, 2H), 2.51–2.35 (m, 1H), 1.80–1.59 (m, 2H), 1.36–1.19 (m, 1H), 0.96 (d,  $J = 6.2$  Hz, 3H), 0.91 (d,  $J = 6.2$  Hz, 3H);  $^{13}\text{C}$  NMR (75 MHz,  $\text{CDCl}_3$ )  $\delta$  195.5, 156.6, 151.5, 148.1, 129.0, 120.9, 110.5, 108.4, 94.4, 56.1, 55.9, 49.2, 42.1, 37.6, 28.6, 25.6, 23.6, 21.9.

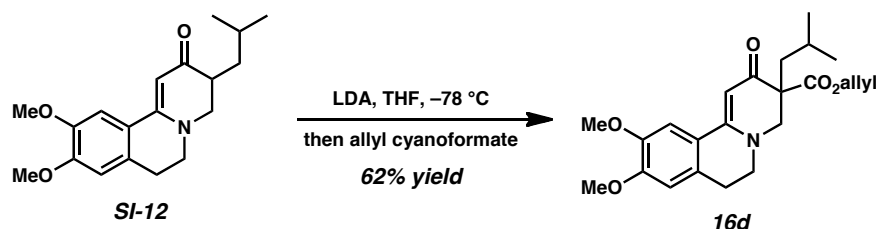

**2,3-Dihydropyridin-4-one 16d.** A solution of **SI-12** (149.1 mg, 0.47 mmol in 15 mol of THF) was cooled to  $-78\text{ }^\circ\text{C}$  and LDA (5.2 mL, 0.1 M in THF, 0.52 mmol, 1.10 equiv) was added dropwise. The reaction was stirred for one hour before allyl cyanoformate (60.2 mg, 0.54 mmol, 1.15 equiv) was added dropwise. After 12 hours, the reaction was quenched with sat.  $\text{NH}_4\text{Cl}$  sol. and allowed to warm to room temperature. The reaction contents were transferred to a separatory funnel where the aqueous phase was extracted four times with  $\text{CH}_2\text{Cl}_2$ . The combined organics were washed with brine, dried over  $\text{MgSO}_4$ , filtered, and concentrated under reduced pressure. The resulting crude mixture was purified by flash column chromatography ( $\text{SiO}_2$ , 15 x 3 cm, 50% EtOAc in hexanes) to afford 2,3-Dihydropyridin-4-one **16d** (116.0 mg, 0.29 mmol, 62% yield) as a yellow solid;  $R_f = 0.40$  (50% EtOAc in hexanes);  $^1\text{H}$  NMR (500 MHz,  $\text{CDCl}_3$ )  $\delta$  7.13 (s, 1H), 6.66 (s, 1H), 5.87 (ddt,  $J = 17.2, 10.3, 5.6$  Hz, 1H), 5.59 (s, 1H), 5.30 (dq,  $J = 17.2, 1.6$  Hz, 1H), 5.17 (dq,  $J = 10.4, 1.3$  Hz, 1H), 4.61 (ddt,  $J = 5.6, 2.7, 1.4$  Hz, 2H), 4.05 (d,  $J = 13.0$  Hz, 1H), 3.91 (s, 3H), 3.87 (s, 3H), 3.62 (d,  $J = 13.1$  Hz, 1H), 3.55 (ddd,  $J = 12.1, 8.1, 5.7$  Hz, 1H), 3.43 (ddd,  $J = 12.2, 6.9, 5.4$  Hz, 1H), 3.00–2.77 (m, 2H), 2.23–2.06 (m, 1H), 1.79–1.60 (m, 2H), 0.96 (d,  $J = 6.2$  Hz, 3H), 0.90 (d,  $J = 6.2$  Hz, 3H);  $^{13}\text{C}$  NMR (125 MHz,  $\text{CDCl}_3$ )  $\delta$  188.1,

171.0, 155.7, 151.6, 148.0, 131.8, 129.0, 120.5, 118.3, 110.3, 108.4, 92.8, 65.7, 56.5, 56.0, 56.0, 54.5, 48.6, 40.4, 28.3, 25.0, 24.4, 23.5; IR (Neat Film NaCl) 2955, 1720, 1625, 1583, 1544, 1495, 1343, 1237, 1211, 1167, 11523, 1120, 1016  $\text{cm}^{-1}$ ; HRMS (MM: ESI-APCI+)  $m/z$  calc'd for  $\text{C}_{23}\text{H}_{30}\text{NO}_5$   $[\text{M}+\text{H}]^+$ : 400.2124, found 400.2110.

### 2,3-Dihydropyridin-4-one Allylic Alkylation Products

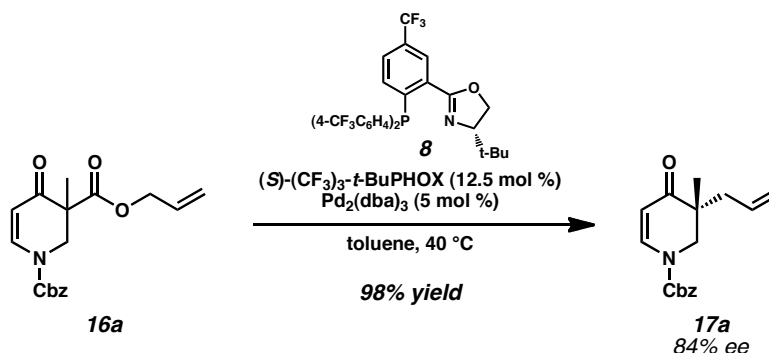

**2,3-Dihydropyridin-4-one 17a.** 2,3-Dihydropyridin-4-one **16a** (27.6 mg, 0.084 mmol, 1.0 equiv) was preloaded in a 1 dram vial and cycled into a glove box. A separate 1 dram vial was loaded with  $(S)\text{-(CF}_3)_3\text{-t-Bu-PHOX}$  (**8**, 4.1 mg, 10.5  $\mu\text{mol}$ , 0.125 equiv),  $\text{Pd}_2(\text{dba})_3$  (3.9 mg, 4.20  $\mu\text{mol}$ , 0.05 equiv), and a magnetic stir-bar. Toluene (1.6 mL) was added and the black suspension was stirred at  $30\text{ }^\circ\text{C}$  in a heating block for 30 min. 2,3-Dihydropyridin-4-one **16a** was dissolved in 1 mL of toluene and added to the orange catalyst solution, causing an immediate color change to olive green. The vial was capped with a Teflon screw cap and the reaction was stirred for 14 h at  $40\text{ }^\circ\text{C}$  in the glove box. Upon completion of the reaction the vial was allowed to cool to room temperature and removed from the glove box. The reaction was concentrated under reduced pressure and the resulting brown oil was purified by flash-chromatography (1:1  $\text{Et}_2\text{O}$ /hexanes) to afford 2,3-Dihydropyridin-4-one **17a** (23.7 mg, 0.083 mmol, 98%) as a colorless oil;  $R_f = 0.73$  (1:1  $\text{Et}_2\text{O}$ /hexanes);  $^1\text{H NMR}$  (500 MHz,  $\text{CDCl}_3$ )  $\delta$  7.78 (s, 1H), 7.42–7.36 (m, 5H), 5.69 (td,  $J = 17.3, 7.5$  Hz, 1H), 5.27 (d,  $J = 2.7$  Hz, 3H), 5.05 (dd,  $J = 29.7, 13.4$  Hz, 2H), 3.91 (d,  $J = 13.4$  Hz, 1H), 3.58 (d,  $J = 11.8$  Hz, 1H), 2.22 (ddd,  $J = 46.4, 13.8, 7.5$  Hz, 2H), 1.07 (s, 3H);  $^{13}\text{C NMR}$  (125 MHz,  $\text{CDCl}_3$ )  $\delta$  198.3, 152.7, 141.7, 135.0, 132.6, 128.8, 128.7, 128.4, 119.2, 106.4, 69.1, 51.4, 43.4, 39.4, 19.5; IR (Neat Film, NaCl) 2922, 1728, 1673, 1602, 1498, 1453, 1416, 1381, 1342, 1305, 1232, 1200, 1144, 1119, 1088, 956, 913, 813, 761  $\text{cm}^{-1}$ ; HRMS (MM: ESI/APCI+)  $m/z$  calc'd for  $\text{C}_{17}\text{H}_{19}\text{NO}_3$   $[\text{M}+\text{H}]^+$ : 286.1443, found 286.1438;  $[\alpha]_D^{25.0} +9.88$  ( $c$  1.15,  $\text{CHCl}_3$ , 84% ee); Thar SFC conditions: 10% MeOH in  $\text{CO}_2$ , 3 mL/min, Chiralpak AD-H column,  $\lambda = 254$  nm,  $t_R$  (min): major = 2.80, minor = 3.13.

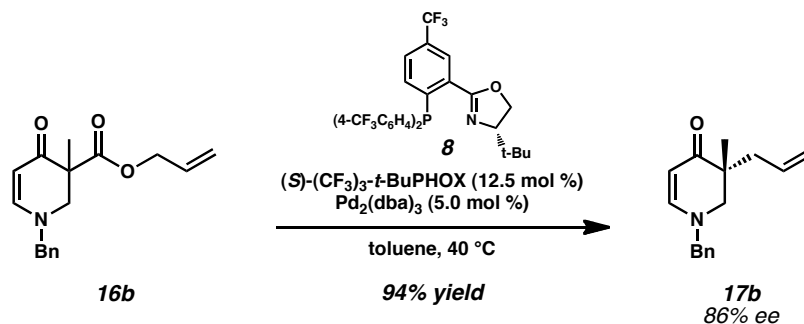

**2,3-Dihydropyridin-4-one 17b.** In a glove box,  $\text{Pd}_2(\text{dba})_3$  (2.3 mg, 0.0025 mmol, 5.0 mol %) and  $(S)\text{-(CF}_3)_3\text{-}t\text{-BuPHOX}$  (**8**, 3.7 mg, 0.00625 mmol, 12.5 mol %) were added to a scintillation vial equipped with a stir bar. The vial was charged with toluene (0.5 mL) and heated at 40 °C for 30 min. 2,3-Dihydropyridin-4-one **16b** (14.3 mg, 0.050 mmol, 1.00 equiv) and additional toluene (1.0 mL, total added = 1.5 mL, 0.033 M) were added, producing a green solution. The vial was sealed and stirred at 40 °C until the starting material was fully converted, determined by LCMS. The reaction mixture was filtered through a celite pad, rinsed with EtOAc, and concentrated under reduced pressure. The crude oil was purified by flash chromatography ( $\text{SiO}_2$ , 5 x 1 cm, 30% EtOAc in hexanes) to afford 2,3-Dihydropyridin-4-one **17b** (11.3 mg, 0.047 mmol, 94% yield) as a yellow oil;  $R_f = 0.30$  (30% EtOAc in hexanes);  $^1\text{H NMR}$  (500 MHz,  $\text{CDCl}_3$ )  $\delta$  7.38–7.25 (m, 3H), 7.24–7.14 (m, 2H), 7.03 (d,  $J = 7.4$  Hz, 1H), 5.54 (ddt,  $J = 17.4$ , 10.1, 7.4 Hz, 1H), 4.94 (ddt,  $J = 9.9$ , 1.9, 0.9 Hz, 1H), 4.91–4.81 (m, 2H), 4.27 (d,  $J = 3.1$  Hz, 2H), 3.07 (d,  $J = 13.0$  Hz, 1H), 2.90 (d,  $J = 13.0$  Hz, 1H), 2.22–1.97 (m, 2H), 0.90 (s, 3H);  $^{13}\text{C NMR}$  (125 MHz,  $\text{CDCl}_3$ )  $\delta$  196.5, 152.3, 135.6, 133.6, 129.0, 129.0, 129.0, 128.3, 128.0, 118.3, 96.9, 60.1, 55.9, 42.7, 39.7, 20.1, 20.0; IR (Neat Film NaCl) 3067, 3029, 2962, 2926, 1634, 1593, 1455, 1359, 1321, 1204, 1172, 1076, 1001, 916, 795  $\text{cm}^{-1}$ ; HRMS (MM: ESI-APCI+)  $m/z$  calc'd for  $\text{C}_{18}\text{H}_{20}\text{NO}$   $[\text{M}+\text{H}]^+$ : 242.1545, found 242.1553;  $[\alpha]_D^{25.0} +86.46$  (c 1.16,  $\text{CHCl}_3$ , 86% ee); HPLC conditions: 10% IPA in hexanes, 1 mL/min, Chiralcel OJ column,  $\lambda = 210$  nm,  $t_R$  (min): major = 18.77, minor = 21.21.

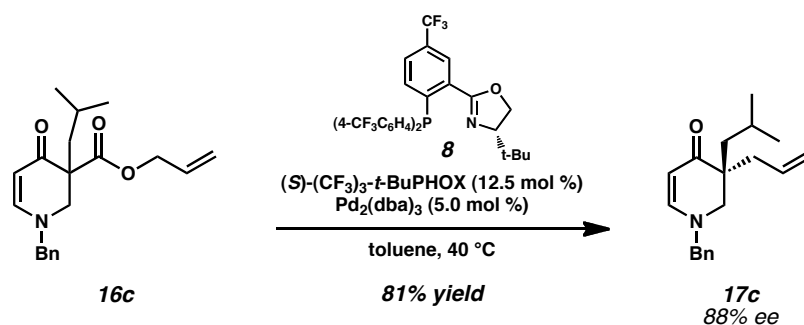

**2,3-Dihydropyridin-4-one 17c.** In a glove box,  $\text{Pd}_2(\text{dba})_3$  (1.4 mg, 0.0015 mmol, 5.0 mol %) and  $(S)\text{-(CF}_3)_3\text{-}t\text{-BuPHOX}$  (**8**, 2.2 mg, 0.00375 mmol, 12.5 mol %) were added to a scintillation vial equipped with a stir bar. The vial was charged with toluene (0.5 mL) and heated at 40 °C for 30 min. 2,3-Dihydropyridin-4-one **16c** (9.8 mg, 0.030 mmol, 1.00 equiv) and additional toluene (0.5 mL, total added = 1.0 mL, 0.030 M) were added, producing a green solution. The vial was sealed and stirred at 40 °C until the starting material was fully converted, determined by TLC. The reaction mixture was filtered through a celite pad, rinsed with EtOAc, and concentrated under reduced pressure. The crude oil was purified by flash chromatography ( $\text{SiO}_2$ , 5 x 1 cm, 30% EtOAc in hexanes) to afford 2,3-Dihydropyridin-4-one **17c** (6.9 mg, 0.024 mmol, 81% yield) as a yellow oil;  $R_f = 0.30$  (30% EtOAc in hexanes);  $^1\text{H NMR}$  (500 MHz,  $\text{CDCl}_3$ )  $\delta$  7.38–7.25 (m, 3H), 7.24–7.14 (m, 2H), 7.03 (d,  $J = 7.4$  Hz, 1H), 5.54 (ddt,  $J = 17.4$ , 10.1, 7.4 Hz, 1H), 4.94 (ddt,  $J = 9.9$ , 1.9, 0.9 Hz, 1H), 4.91–4.81 (m, 2H), 4.27 (d,  $J = 3.1$  Hz, 2H), 3.07 (d,  $J = 13.0$  Hz, 1H), 2.90 (d,  $J = 13.0$  Hz, 1H), 2.22–1.97 (m, 2H), 0.90 (s, 3H);  $^{13}\text{C NMR}$  (125 MHz,  $\text{CDCl}_3$ )  $\delta$  196.5, 152.3, 135.6, 133.6, 129.0, 129.0, 129.0, 128.3, 128.0, 118.3, 96.9, 60.1, 55.9, 42.7, 39.7, 20.1, 20.0; IR (Neat Film NaCl) 3067, 3029, 2962, 2926, 1634, 1593, 1455, 1359, 1321, 1204, 1172, 1076, 1001, 916, 795  $\text{cm}^{-1}$ ; HRMS (MM: ESI-APCI+)  $m/z$  calc'd for  $\text{C}_{18}\text{H}_{20}\text{NO}$   $[\text{M}+\text{H}]^+$ : 242.1545, found 242.1553;  $[\alpha]_D^{25.0} +86.46$  (c 1.16,  $\text{CHCl}_3$ , 86% ee); HPLC conditions: 10% IPA in hexanes, 1 mL/min, Chiralcel OJ column,  $\lambda = 210$  nm,  $t_R$  (min): major = 18.77, minor = 21.21.

yield) as a yellow oil;  $R_f = 0.40$  (30% EtOAc in hexanes);  $^1\text{H NMR}$  (500 MHz,  $\text{CDCl}_3$ )  $\delta$  7.45–7.32 (m, 3H), 7.29–7.22 (m, 2H), 7.05 (d,  $J = 7.4$  Hz, 1H), 5.62 (dddd,  $J = 17.1, 10.1, 7.8, 7.0$  Hz, 1H), 5.00 (ddt,  $J = 10.1, 2.1, 1.0$  Hz, 1H), 4.97–4.91 (m, 2H), 4.33 (s, 2H), 3.13 (d,  $J = 3.2$  Hz, 2H), 2.34–2.24 (m, 1H), 2.16 (ddt,  $J = 14.1, 7.8, 1.1$  Hz, 1H), 1.61 (qd,  $J = 6.7, 5.6$  Hz, 1H), 1.47 (dd,  $J = 14.2, 6.3$  Hz, 1H), 1.33 (dd,  $J = 14.2, 5.5$  Hz, 1H), 0.84 (d,  $J = 6.6$  Hz, 3H), 0.82 (d,  $J = 6.6$  Hz, 3H);  $^{13}\text{C NMR}$  (125 MHz,  $\text{CDCl}_3$ )  $\delta$  195.8, 151.8, 135.6, 134.1, 128.9, 128.3, 128.1, 118.1, 98.0, 60.1, 54.6, 41.6, 38.9, 24.9, 24.4, 23.9; IR (Neat Film NaCl) 3072, 3029, 2954, 2867, 1633, 1593, 1494, 1455, 1385, 1361, 1296, 1205, 1173, 1105, 1076, 1028, 998, 793, 736  $\text{cm}^{-1}$ ; HRMS (MM: ESI-APCI+)  $m/z$  calc'd for  $\text{C}_{19}\text{H}_{26}\text{NO}$   $[\text{M}+\text{H}]^+$ : 284.2014, found 284.2023;  $[\alpha]_D^{25.0} +50.23$  (c 0.65,  $\text{CHCl}_3$ , 88% ee); HPLC conditions: 7% IPA in hexanes, 1 mL/min, Chiralcel OJ column,  $\lambda = 210$  nm,  $t_R$  (min): major = 11.44, minor = 14.80.

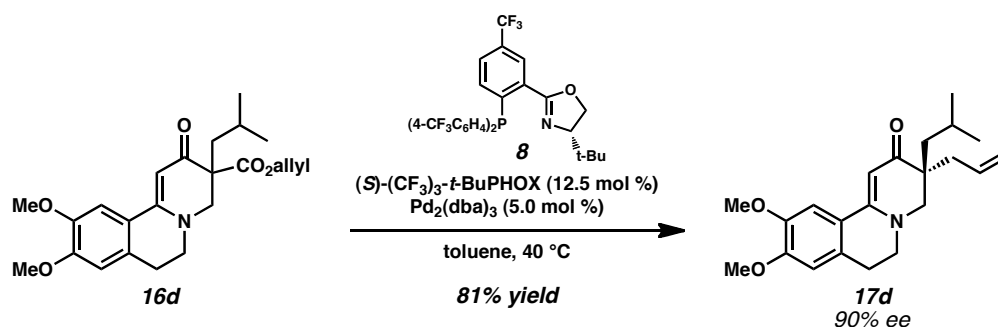

**2,3-Dihydropyridin-4-one 17d.**  $\text{Pd}_2(\text{dba})_3$  (1.4 mg, 0.0015 mmol, 5.0 mol %) and  $(S)\text{-(CF}_3)_3\text{-}t\text{-BuPHOX}$  (**8**, 2.2 mg, 0.00375 mmol, 12.5 mol %) were added to an oven-dried Schlenk tube equipped with a magnetic stir bar and the tube was cycled with vacuum/argon for 3 times. The tube was charged with toluene (1 mL) and heated at 40 °C for 30 min, generating a red/orange solution. 2,3-Dihydropyridin-4-one **16d** (11.9 mg, 0.03 mmol, 1.00 equiv) were added and the tube was lowered into a heating block (40 °C). After 3 hours, the reaction was completed, monitored by TLC. Subsequently, the reaction was filtered through a silica gel plug, rinsed with EtOAc, and concentrated under reduced pressure. The crude mixture was purified by flash column chromatography ( $\text{SiO}_2$ , 10 x 2 cm, 50% EtOAc in hexanes) to afford dihydropyridin-4-one **17d** (8.6 mg, 0.0242 mmol, 81% yield) as yellow oil;  $R_f = 0.50$  (50% EtOAc in hexanes);  $^1\text{H NMR}$  (500 MHz,  $\text{CDCl}_3$ )  $\delta$  7.16 (s, 1H), 6.66 (s, 1H), 5.82 (ddt,  $J = 17.4, 10.2, 7.4$  Hz, 1H), 5.62 (s, 1H), 5.10–5.03 (m, 2H), 3.91 (s, 3H), 3.87 (s, 3H), 3.39 (s, 2H), 3.37 (td,  $J = 7.0, 6.5, 1.5$  Hz, 2H), 2.99–2.89 (m, 2H), 2.43 (ddt,  $J = 13.9, 7.2, 1.3$  Hz, 1H), 2.25 (ddt,  $J = 14.0, 7.7, 1.1$  Hz, 1H), 1.74 (hd,  $J = 6.6, 5.0$  Hz, 1H), 1.66 (dd,  $J = 14.1, 6.5$  Hz, 1H), 1.44 (dd,  $J = 14.1, 5.1$  Hz, 1H), 0.94 (d,  $J = 6.6$  Hz, 3H), 0.90 (d,  $J = 6.5$  Hz, 3H);  $^{13}\text{C NMR}$  (125 MHz,  $\text{CDCl}_3$ )  $\delta$  196.3, 155.6, 151.4, 148.0, 134.7, 128.7, 120.8, 117.9, 110.4, 108.3, 94.3, 58.9, 56.0, 48.9, 46.1, 41.7, 39.2, 28.4, 25.1, 24.5, 24.1; IR (Neat Film NaCl) 2953, 1622, 1586, 1549, 1495, 1464, 1342, 1212, 1173, 1110, 1016, 913, 794  $\text{cm}^{-1}$ ; HRMS (MM: ESI-APCI+)  $m/z$  calc'd for  $\text{C}_{22}\text{H}_{30}\text{NO}_3$   $[\text{M}+\text{H}]^+$ : 356.2147, found 356.2221;  $[\alpha]_D^{25.0} +32.49$  (c 0.71,  $\text{CHCl}_3$ , 90% ee); HPLC conditions: 30% IPA in hexanes, 1 mL/min, Chiralpak AD column,  $\lambda = 254$  nm,  $t_R$  (min): major = 21.87, minor = 18.59.

## Procedures for the Preparation of Lactams

### Lactam Allylic Alkylation Precursors

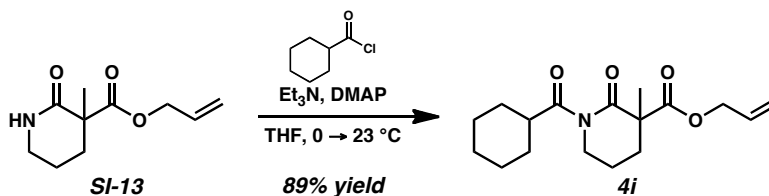

**Lactam 4i.** Lactam **SI-13**<sup>13</sup> (117.8 mg, 0.597 mmol, 1.00 equiv) was transferred to a flame-dried 15 mL round-bottom flask using THF (4 x 0.5 mL + 1 x 0.4 mL rinses, total = 2.4 mL, 0.25 M). Et<sub>3</sub>N (250  $\mu$ L, 1.79 mmol, 3.00 equiv) and DMAP (9.3 mg, 0.0761 mmol, 13 mol%) were added and the flask was lowered into a 0  $^\circ$ C bath (ice/water). Cyclohexanecarbonyl chloride (160  $\mu$ L, 1.20 mmol, 2.00 equiv) was added dropwise and the reaction transitioned from a solution to a white slurry. The ice bath expired gradually as the reaction was stirred overnight. After 15 h of stirring, no starting material remained by TLC analysis. The reaction was subsequently quenched with brine (15 mL) and transferred to a separatory funnel where the aqueous layer was extracted four times with EtOAc. The combined organics (100 mL) were rinsed twice with brine (20 mL), dried over Na<sub>2</sub>SO<sub>4</sub>, filtered, and concentrated under reduced pressure. The resulting crude oil was purified by flash column chromatography (SiO<sub>2</sub>, 27.5 x 2 cm, 100% hexanes  $\rightarrow$  10% EtOAc in hexanes) to afford lactam **4i** (163.5 mg, 0.532 mmol, 89% yield) as a yellow oil;  $R_f$  = 0.60 (30% EtOAc in hexanes); <sup>1</sup>H NMR (500 MHz, CDCl<sub>3</sub>)  $\delta$  5.88 (dddd,  $J$  = 17.1, 10.4, 5.8 Hz, 1H), 5.32 (dq,  $J$  = 17.2, 1.5 Hz, 1H), 5.25 (dq,  $J$  = 10.4, 1.2 Hz, 1H), 4.64 (ddt,  $J$  = 5.8, 2.5, 1.3 Hz, 2H), 3.77 (ddd,  $J$  = 13.1, 7.7, 5.1 Hz, 1H), 3.58 (dddd,  $J$  = 13.4, 7.0, 5.0, 1.1 Hz, 1H), 3.27 (tt,  $J$  = 11.4, 3.2 Hz, 1H), 2.42 (dddd,  $J$  = 13.4, 6.0, 4.9, 0.9 Hz, 1H), 1.95 (dtd,  $J$  = 10.5, 3.5, 1.8 Hz, 1H), 1.92–1.80 (m, 3H), 1.79–1.70 (m, 3H), 1.67 (dtt,  $J$  = 10.8, 3.2, 1.5 Hz, 1H), 1.52 (s, 3H), 1.47–1.34 (m, 2H), 1.34–1.16 (m, 3H); <sup>13</sup>C NMR (125 MHz, CDCl<sub>3</sub>)  $\delta$  181.3, 173.5, 172.7, 131.4, 119.2, 66.4, 53.5, 45.7, 44.6, 33.1, 30.1, 29.6, 26.1, 25.9, 25.8, 23.0, 20.3; IR (Neat Film NaCl) 3086, 2931, 2855, 1738, 1694, 1652, 1479, 1451, 1378, 1330, 1301, 1249, 1218, 1196, 1159, 1134, 1073, 1053, 1032, 981, 957, 939, 896, 887, 842, 796, 773 cm<sup>-1</sup>; HRMS (MM: ESI-APCI+)  $m/z$  calc'd for C<sub>17</sub>H<sub>26</sub>O<sub>4</sub>N [M+H]<sup>+</sup>: 308.1856, found 308.1871.

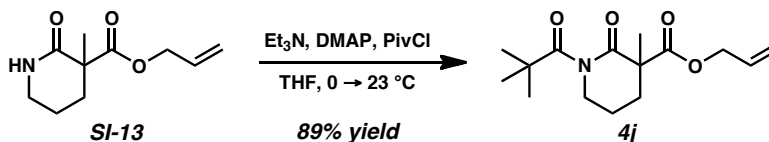

**Lactam 4j.** Lactam **SI-13**<sup>9</sup> (480 mg, 2.4 mmol, 1.0 equiv) in a 25 mL round-bottom flask equipped with a magnetic stir bar was taken up in THF (9.6 mL, 0.25 M). Et<sub>3</sub>N (1.0 mL, 7.2 mmol, 3.0 equiv) and DMAP (29 mg, 0.24 mmol, 0.10 equiv) were added and the flask was lowered into a 0  $^\circ$ C bath (ice/water). Pivaloyl chloride (0.59 mL, 4.8 mmol, 2.0 equiv) was added dropwise and the reaction transitioned from a solution to a white slurry. The ice bath expired gradually as the reaction was stirred overnight. After 24 h of stirring, TLC analysis indicated that conversion had ceased at approximately 90%. The reaction was subsequently diluted with 20 mL EtOAc, quenched with brine (20 mL) and transferred to a separatory funnel where the aqueous layer was extracted three times with EtOAc (20 mL). The combined organics were washed twice with brine (20 mL), dried over Na<sub>2</sub>SO<sub>4</sub>, filtered, and concentrated under

reduced pressure. The resulting crude oil was purified by flash column chromatography (SiO<sub>2</sub>, 11 x 3 cm, 20% EtOAc in hexanes) to afford lactam **4j** (612 mg, 2.18 mmol, 89% yield) as a pale yellow oil; *R<sub>f</sub>* = 0.37 (20% EtOAc in hexanes); <sup>1</sup>H NMR (500 MHz, CDCl<sub>3</sub>) δ 5.90 (ddt, *J* = 17.2, 10.4, 5.9 Hz, 1H), 5.33 (dq, *J* = 17.2, 1.5 Hz, 1H), 5.25 (dq, *J* = 10.4, 1.3 Hz, 1H), 4.70–4.59 (m, 2H), 3.62 (ddd, *J* = 12.8, 8.2, 4.9 Hz, 1H), 3.45 (dddd, *J* = 12.4, 6.2, 4.9, 1.0 Hz, 1H), 2.40 (dddd, *J* = 13.6, 7.1, 4.0, 1.0 Hz, 1H), 2.01–1.83 (m, 2H), 1.74 (ddd, *J* = 13.7, 9.5, 4.1 Hz, 1H), 1.52 (s, 3H), 1.29 (s, 9H); <sup>13</sup>C NMR (125 MHz, CDCl<sub>3</sub>) δ 190.8, 172.5, 131.7, 119.2, 66.4, 52.5, 47.9, 44.5, 33.6, 28.0, 22.8, 20.3; IR (Neat Film NaCl) 3434, 2090, 1650, 1257, 1125 cm<sup>-1</sup>; HRMS (MM: ESI-APCI+) *m/z* calc'd for C<sub>15</sub>H<sub>24</sub>NO<sub>4</sub> [M+H]<sup>+</sup>: 282.1700, found 282.1705.

### Lactam Allylic Alkylation Products

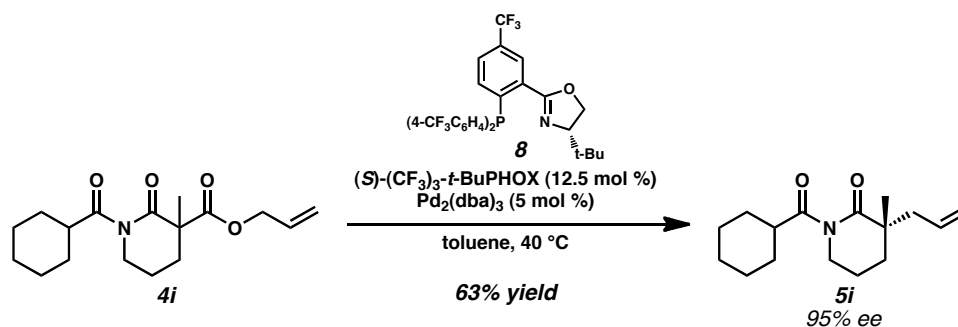

**Lactam 5i.** Pd<sub>2</sub>(dba)<sub>3</sub> (16.4 mg, 0.0150 mmol, 5.0 mol %) and (S)-(CF<sub>3</sub>)<sub>3</sub>-*t*-BuPHOX (**8**, 22.1 mg, 0.0374 mmol, 12.5 mol %) were added to an oven-dried scintillation vial equipped with a magnetic stir bar and the vial was cycled into a glove box. The vial was charged with toluene (2.06 mL) and stirred at ambient temperature for 30 min, generating a red/orange solution. Lactam **4i** (91.9 mg, 0.299 mmol, 1.00 equiv) was transferred to the scintillation vial with toluene (3 x 2 mL + 1 x 1 mL rinses, total = 9.06 mL, 0.033 M) producing a green solution. The vial was sealed with a Teflon-lined cap, removed from the glove box, and lowered into a heating block (40 °C). After 7 days, the reaction was filtered through a silica gel plug, rinsed with EtOAc, and concentrated under reduced pressure. The crude oil was purified by flash column chromatography (SiO<sub>2</sub>, 27.5 x 2 cm, 100% hexanes→5%→10% EtOAc in hexanes) to afford recovered lactam **4i** (17.2 mg, 0.0560 mmol, 19% recovered) and lactam **5i** (49.8 mg, 0.189 mmol, 63% yield, 78% yield based on recovered lactam **4i**) as a yellow oil; *R<sub>f</sub>* = 0.73 (30% EtOAc in hexanes); <sup>1</sup>H NMR (500 MHz, CDCl<sub>3</sub>) δ 5.74 (dddd, *J* = 16.6, 10.4, 7.8, 6.9 Hz, 1H), 5.13–5.06 (m, 2H), 3.76–3.67 (m, 1H), 3.57–3.49 (m, 1H), 3.18 (tt, *J* = 11.4, 3.3 Hz, 1H), 2.51 (ddt, *J* = 13.6, 6.9, 1.2 Hz, 1H), 2.27 (ddt, *J* = 13.6, 7.8, 1.1 Hz, 1H), 1.90 (dddd, *J* = 12.7, 5.5, 2.9, 1.4 Hz, 1H), 1.87–1.72 (m, 7H), 1.67 (dtt, *J* = 10.8, 3.5, 1.5 Hz, 1H), 1.62–1.56 (m, 1H), 1.42 (dtdd, *J* = 12.9, 12.0, 11.2, 3.2 Hz, 2H), 1.35–1.19 (m, 2H), 1.26 (s, 3H); <sup>13</sup>C NMR (125 MHz, CDCl<sub>3</sub>) δ 181.9, 179.5, 133.5, 118.9, 46.1, 45.8, 45.0, 44.5, 33.3, 30.0, 30.0, 26.1, 25.9, 25.9, 25.8, 19.8; IR (Neat Film NaCl) 3076, 2930, 2854, 1690, 1478, 1451, 1375, 1329, 1313, 1286, 1246, 1198, 1158, 1136, 1089, 1072, 1031, 996, 975, 919, 759 cm<sup>-1</sup>; HRMS (MM: ESI-APCI+) *m/z* calc'd for C<sub>16</sub>H<sub>26</sub>O<sub>2</sub>N [M+H]<sup>+</sup>: 264.1958, found 264.1945; [α]<sub>D</sub><sup>25.0</sup> –96.13 (c 1.06, CHCl<sub>3</sub>, 95% ee); JASCO SFC conditions: 1% IPA in CO<sub>2</sub>, 5 mL/min, Chiralcel OJ-H column, λ = 222 nm, *t<sub>R</sub>* (min): major = 2.53, minor = 2.13.

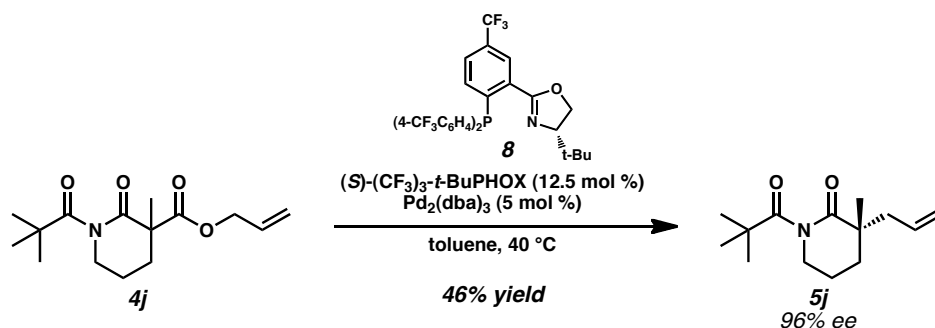

**Lactam 5j.**  $\text{Pd}_2(\text{pmdba})_3$  (27 mg, 25  $\mu\text{mol}$ , 5.0 mol %) and  $(S)\text{-(CF}_3)_3\text{-}t\text{-BuPHOX}$  (**8**, 37 mg, 63  $\mu\text{mol}$ , 12.5 mol %) were added to an oven-dried 20 mL scintillation vial equipped with a magnetic stir bar in a glove box. The vial was charged with toluene (12 mL) and stirred at ambient temperature (28 °C) for 30 min, resulting in a deep orange solution. Lactam **4j** (140 mg, 0.50 mmol, 1.0 equiv) was transferred to the scintillation vial with toluene (2 mL, total = 15 mL, 0.033 M), producing a light green solution. The vial was sealed with a Teflon-lined cap and lowered into a heating block (40 °C). After 16 days, TLC analysis indicated that conversion had ceased at approximately 50% and the vial was removed from the glove box and the reaction was filtered through a silica gel plug, rinsed with  $\text{Et}_2\text{O}$ , and concentrated under reduced pressure. The crude oil was purified by flash column chromatography ( $\text{SiO}_2$ , 15 x 2.5 cm, 5% EtOAc in hexanes) to afford lactam **5j** (54 mg, 0.23 mmol, 46% yield) as a colorless oil;  $R_f = 0.58$  (20% EtOAc in hexanes);  $^1\text{H NMR}$  (500 MHz,  $\text{CDCl}_3$ )  $\delta$  5.77 (dddd,  $J = 17.1, 10.2, 7.8, 7.0$  Hz, 1H), 5.16–5.05 (m, 2H), 3.53–3.38 (m, 2H), 2.51 (ddt,  $J = 13.7, 7.0, 1.3$  Hz, 1H), 2.28 (ddt,  $J = 13.7, 7.7, 1.1$  Hz, 1H), 1.92–1.80 (m, 3H), 1.61–1.58 (m, 1H), 1.27 (s, 9H), 1.25 (s, 3H);  $^{13}\text{C NMR}$  (125 MHz,  $\text{CDCl}_3$ )  $\delta$  191.5, 179.0, 133.7, 118.9, 48.5, 44.2, 43.4, 43.3, 33.4, 28.1, 25.0, 19.8; IR (Neat Film NaCl) 2963, 1684, 1482, 1457, 1391, 1282, 1259, 1156, 917  $\text{cm}^{-1}$ ; HRMS (MM: ESI-APCI)  $m/z$  calc'd for  $\text{C}_{14}\text{H}_{23}\text{NO}_2$   $[\text{M}+\text{H}]^+$ : 238.1802, found 238.1809;  $[\alpha]_D^{25.0} -7.13$  (c 2.45,  $\text{CHCl}_3$ , 96% ee); HPLC conditions: 5% IPA in hexanes, 1 mL/min, Chiralcel OD-H column,  $\lambda = 210$  nm,  $t_R$  (min): major = 7.95, minor = 6.52.

## Procedures for the Preparation of Imides

### Imide Allylic Alkylation Precursors

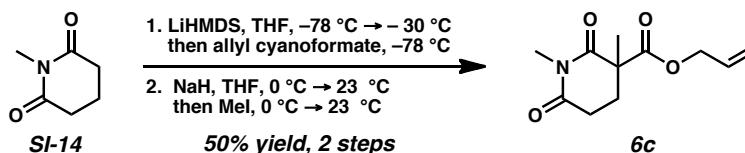

**N-Methyl imide 6c.** A flame-dried 200 mL round-bottom flask containing a magnetic stir bar was cycled into a glove box and loaded with LiHMDS (5.69 g, 34.0 mmol, 1.7 equiv). The flask was removed from the glove box, reconnected to a manifold, and charged with THF (100 mL, 0.2 M) and lowered into a  $-78\text{ }^\circ\text{C}$  bath. Imide **SI-14**<sup>14</sup> (2.54 g, 20.0 mmol, 1.0 equiv) was added neat. After 1 h at  $-78\text{ }^\circ\text{C}$ , the solution was warmed to  $30\text{ }^\circ\text{C}$  and stirred for 30 min before cooling back to  $-78\text{ }^\circ\text{C}$ . Allyl cyanoformate (2.67 g, 24.0 mmol, 1.2 equiv) was added neat and the reaction was stirred for 1.5 h before TLC analysis indicated consumption of starting material. The reaction was subsequently quenched with brine and transferred to a separatory funnel where the aqueous layer was extracted with EtOAc (4 x 50 mL). The combined organics were rinsed twice with brine, dried over  $\text{Na}_2\text{SO}_4$ , filtered, and concentrated under reduced pressure. The



resulting crude oil was purified by flash column chromatography (SiO<sub>2</sub>, 5 cm x 7 inches, 25%→30%→40% EtOAc in hexanes) to afford an intermediate oil (2.63 g, 0.45 mmol, 62% yield) that was moved on to the next step.

A flame-dried 200 mL flask equipped with a magnetic stir bar was charged with sodium hydride (60% in mineral oil, 312.5 mg, 7.81 mmol, 1.1 equiv) and THF (71 mL, 0.1 M) and cooled to 0 °C. A portion of the oil from the previous step (1.5 g, 7.10 mmol, 1.0 equiv) was added neat. After 1.5 h at 0 °C, the reaction was warmed to room temperature and stirred for 1 h before cooling back to 0 °C. Methyl iodide (886 μL, 14.20 mmol, 2.0 equiv) was added and the reaction was stirred for 2 h before warming to room temperature. After 15 h, the reaction was poor over a mixture of water and brine and transferred to a separatory funnel where the aqueous layer was extracted with EtOAc (4 x 50 mL). The combined organics were rinsed twice with Na<sub>2</sub>S<sub>2</sub>O<sub>3</sub> sol. (sat. solution half diluted) and twice with brine, dried over Na<sub>2</sub>SO<sub>4</sub>, filtered, and concentrated under reduced pressure. The resulting crude oil was purified by flash column chromatography (SiO<sub>2</sub>, 5 cm x 8 inches, 10% →20% EtOAc in hexanes) to afford imide **6c** (1.28 g, 5.69 mmol, 80% yield, 50% yield over two steps); *R*<sub>f</sub> = 0.32 (35% EtOAc in hexanes); <sup>1</sup>H NMR (500 MHz, CDCl<sub>3</sub>) δ 5.85 (ddt, *J* = 17.2, 10.5, 5.7 Hz, 1H), 5.29 (dq, *J* = 17.2, 1.5 Hz, 1H), 5.25 (dq, *J* = 10.5, 1.2 Hz, 1H), 4.63 (ddt, *J* = 5.6, 4.1, 1.4 Hz, 2H), 3.18 (s, 3H), 2.72 (ddd, *J* = 18.1, 5.4, 4.4 Hz, 1H), 2.64 (ddd, *J* = 17.9, 11.6, 5.4 Hz, 1H), 2.35 (ddd, *J* = 13.9, 5.4, 4.4 Hz, 1H), 1.89 (ddd, *J* = 13.9, 11.6, 5.4 Hz, 1H), 1.56 (s, 3H); <sup>13</sup>C NMR (125 MHz, CDCl<sub>3</sub>) δ 172.0, 171.8, 171.3, 131.2, 119.3, 66.5, 50.9, 30.0, 28.7, 27.3, 21.9; IR (Neat Film NaCl) 2987, 2943, 1726, 1678, 1458, 1416, 1381, 1356, 1305, 1261, 1247, 1182, 1106, 1036, 993, 938 cm<sup>-1</sup>; HRMS (MM: ESI-APCI+) *m/z* calc'd for C<sub>11</sub>H<sub>17</sub>NO<sub>4</sub> [M+H]<sup>+</sup>: 226.1074, found 226.1078.

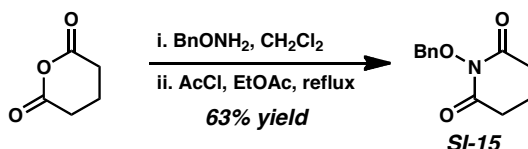

***N*-benzyloxyimide SI-15.** Benzyloxyamine hydrochloride (3.15 g, 19.7 mmol) in a 100 mL round-bottom flask was taken up in dichloromethane (30 mL) and saturated aqueous K<sub>2</sub>CO<sub>3</sub> (30 mL) and stirred for 30 min. The mixture was transferred to a separatory funnel and the phases were separated. The aqueous phase was extracted twice with dichloromethane (30 mL), the combined organic phases were dried over Na<sub>2</sub>SO<sub>4</sub>, filtered, and concentrated under reduced pressure. A portion of the resulting crude colorless oil (1.23 g, 10.0 mmol, 1.00 equiv) was diluted with dichloromethane (10 mL, 1.0 M) in a 50 mL round-bottom flask and glutaric anhydride (1.14 g, 10.0 mmol, 1.00 equiv) was added. An exotherm was observed, and the mixture was immediately concentrated under reduced pressure. The resulting residue was taken up in EtOAc (13 mL, 0.75 M) and acetyl chloride (2.00 mL, 2.81 mmol, 2.81 equiv) was added. A water condenser was affixed and the reaction was heated to a gentle reflux (oil bath, 85 °C) for 18 h. The reaction was diluted with EtOAc (30 mL), dried over Na<sub>2</sub>SO<sub>4</sub>, filtered, and concentrated under reduced pressure. The crude solid was purified by flash column chromatography (SiO<sub>2</sub>, 6 x 5 cm, 20% EtOAc in hexanes→50% Et<sub>2</sub>O in dichloromethane) to afford *N*-benzyloxyimide **SI-15** (1.37 g, 6.25 mmol, 63% yield) as a white solid; *R*<sub>f</sub> = 0.64 (20% Et<sub>2</sub>O in methylene chloride); <sup>1</sup>H NMR (500 MHz, CDCl<sub>3</sub>) δ 7.56–7.45 (m, 2H), 7.41–7.29 (m, 3H), 5.01 (s, 2H), 2.74–2.60 (m, 4H), 1.94–1.85 (m, 2H); <sup>13</sup>C NMR (125 MHz, CDCl<sub>3</sub>) δ 168.48, 133.95, 130.09, 129.23, 128.51, 78.17, 33.47, 17.05; IR (Neat Film NaCl) 3033, 2957, 2902, 1689, 1457, 1381, 1350, 1331, 1251, 1175, 1134, 1087, 1056, 999, 968, 919, 893, 838, 759 cm<sup>-1</sup>; HRMS (MM: ESI-APCI) *m/z* calc'd for C<sub>12</sub>H<sub>13</sub>NO<sub>3</sub> [M+H]<sup>+</sup>: 220.0968, found 220.0971.

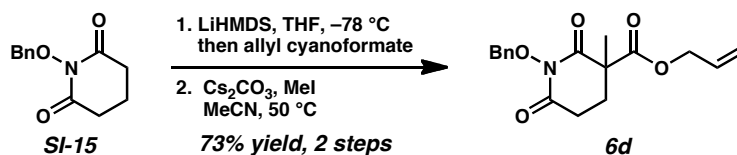

***N*-Benzyloxy imide 6d.** Acylation performed in manner analogous to *N*-methyl imide **6c** at  $-78$  °C using *N*-benzyloxy imide **SI-15** as starting material. Alkylation performed in manner analogous to  $\beta$ -ketoester **18a** at  $50$  °C. *N*-Benzyloxy imide **6d** was isolated after flash column chromatography ( $\text{SiO}_2$ , 17 to 25% EtOAc in hexanes) as a colorless oil (73% yield over two steps);  $R_f = 0.20$  (20% EtOAc in hexanes);  $^1\text{H NMR}$  (500 MHz,  $\text{CDCl}_3$ )  $\delta$  7.53 (m, 2H), 7.37 (m, 3H), 5.87 (ddt,  $J = 17.2, 10.4, 5.9$  Hz, 1H), 5.33 (dq,  $J = 17.2, 1.5$  Hz, 1H), 5.28 (dq,  $J = 10.4, 1.2$  Hz, 1H), 5.01 (s, 2H), 4.66 (ddt,  $J = 13.0, 5.9, 1.3$  Hz, 1H), 4.65 (ddt,  $J = 13.0, 5.9, 1.3$  Hz, 1H), 2.72 (m, 2H), 2.30 (ddd,  $J = 14.1, 5.2, 4.0$  Hz, 1H), 1.86 (ddd,  $J = 14.1, 11.8, 5.5$  Hz, 1H), 1.56 (s, 3H);  $^{13}\text{C NMR}$  (125 MHz,  $\text{CDCl}_3$ )  $\delta$  170.7, 167.9, 167.4, 133.9, 130.9, 130.1, 129.2, 128.5, 119.9, 77.9, 66.9, 52.1, 30.5, 28.5, 21.6; IR (Neat Film NaCl) 2943, 1738, 1733, 1708, 1451, 1255, 1200, 1168, 976  $\text{cm}^{-1}$ ; HRMS (MM: ESI-APCI)  $m/z$  calc'd for  $\text{C}_{17}\text{H}_{20}\text{NO}_5$   $[\text{M}+\text{H}]^+$ : 318.1336, found 318.1339.

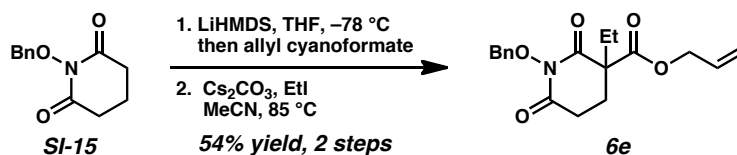

***N*-Benzyloxy imide 6e.** Acylation performed in manner analogous to *N*-methyl imide **6c** at  $-78$  °C using *N*-benzyloxy imide **SI-15** as starting material. Alkylation performed in manner analogous to  $\beta$ -ketoester **18a** at  $85$  °C using ethyl iodide. *N*-Benzyloxy imide **6e** was isolated after flash column chromatography ( $\text{SiO}_2$ , 14 to 20% EtOAc in hexanes) as a colorless oil (54% yield over two steps);  $R_f = 0.24$  (20% EtOAc in hexanes);  $^1\text{H NMR}$  (500 MHz,  $\text{CDCl}_3$ )  $\delta$  7.53 (m, 2H), 7.37 (m, 3H), 5.87 (ddt,  $J = 17.2, 10.4, 5.9$  Hz, 1H), 5.34 (dq,  $J = 17.2, 1.5$  Hz, 1H), 5.27 (dq,  $J = 10.4, 1.2$  Hz, 1H), 5.0 (s, 2H), 4.66 (dt,  $J = 5.9, 1.3$  Hz, 2H), 2.74 (m, 2H), 2.22 (ddd,  $J = 14.0, 5.2, 3.5$  Hz, 1H), 2.05 (m, 2H), 1.96 (ddd,  $J = 14.0, 12.3, 5.4$  Hz, 1H), 0.95 (t,  $J = 7.4$  Hz, 3H);  $^{13}\text{C NMR}$  (125 MHz,  $\text{CDCl}_3$ )  $\delta$  170.2, 167.5, 167.1, 134.0, 131.0, 130.1, 129.3, 128.6, 120.0, 77.9, 66.8, 56.2, 30.4, 28.3, 24.8, 9.0; IR (Neat Film NaCl) 2943, 1733, 1713, 1648, 1454, 1237, 1190, 1168, 976, 752  $\text{cm}^{-1}$ ; HRMS (MM: ESI-APCI)  $m/z$  calc'd for  $\text{C}_{18}\text{H}_{22}\text{NO}_5$   $[\text{M}+\text{H}]^+$ : 332.1492, found 332.1493.

## Imide Allylic Alkylation Products

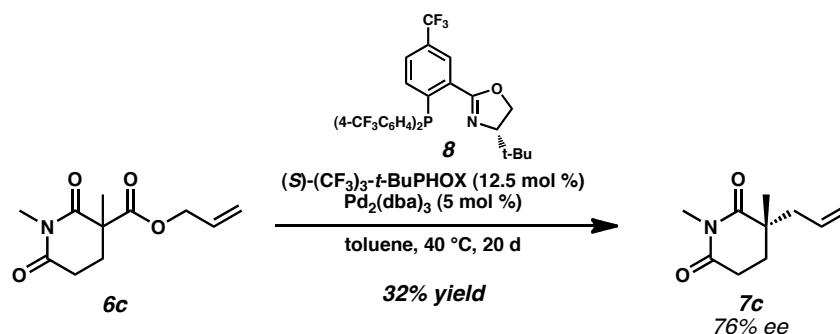

***N*-Methyl imide 7c.** Prepared in a manner analogous to lactam **5h** using *N*-methyl imide **6c** as starting material. After 20 d, the reaction was filtered, concentrated, and *N*-Methyl imide **7c** was isolated following flash column chromatography (SiO<sub>2</sub>, 3 cm x 10 inches, 5% → 7% → 9% → 10% → 12% EtOAc in hexanes) as an oil (32% yield); *R<sub>f</sub>* = 0.36 (20% EtOAc in hexanes); <sup>1</sup>H NMR (500 MHz, CDCl<sub>3</sub>) δ 5.71 (dddd, *J* = 17.1, 10.2, 7.6, 7.1 Hz, 1H), 5.15–5.08 (m, 2H), 3.12 (s, 3H), 2.75–2.62 (m, 2H), 2.47 (ddt, *J* = 13.8, 7.1, 1.2 Hz, 1H), 2.29 (ddt, *J* = 13.8, 7.7, 1.1 Hz, 1H), 1.92 (ddd, *J* = 14.3, 8.6, 5.9 Hz, 1H), 1.66 (ddd, *J* = 14.0, 7.1, 5.8 Hz, 1H), 1.24 (s, 3H); <sup>13</sup>C NMR (125 MHz, CDCl<sub>3</sub>) δ 177.6, 172.5, 132.8, 119.5, 42.6, 41.7, 29.3, 27.8, 27.0, 23.4; IR (Neat Film NaCl) 2971, 2937, 2876, 1723, 1674, 1464, 1415, 1378, 1356, 1291, 1240, 1110, 1036, 998, 919 cm<sup>-1</sup>; HRMS (MM: ESI-APCI) *m/z* calc'd for C<sub>10</sub>H<sub>16</sub>NO<sub>2</sub> [M+H]<sup>+</sup>: 182.1176, found 182.1178; [α]<sub>D</sub><sup>25.0</sup> -54.19 (c 1.64, CHCl<sub>3</sub>, 76% ee); HPLC conditions: 3% IPA in hexanes, 1 mL/min, Chiralpak AD column, λ = 210 nm, *t<sub>r</sub>* (min): major = 11.94, minor = 17.86.

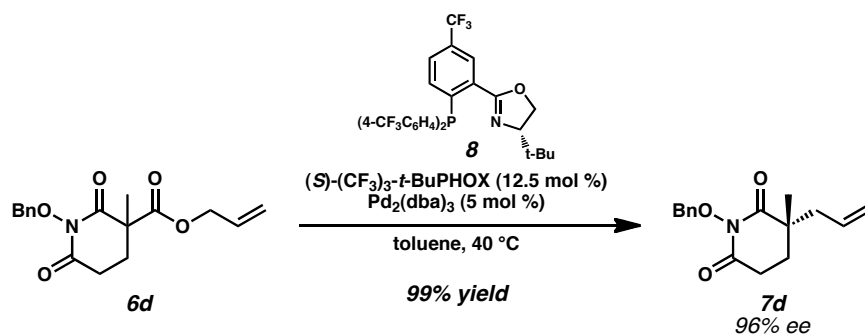

***N*-Benzyloxy imide 7d.** Prepared in a manner analogous to lactam **5h** using *N*-benzyloxy imide **6d** as starting material. *N*-Benzyloxy imide **7d** was isolated after flash column chromatography (SiO<sub>2</sub>, 20% EtOAc in hexanes) as a colorless oil (99% yield); *R<sub>f</sub>* = 0.29 (20% EtOAc in hexanes); <sup>1</sup>H NMR (500 MHz, CDCl<sub>3</sub>) δ 7.51 (m, 2H), 7.36 (m, 3H), 5.64 (dddd, *J* = 17.2, 10.2, 7.7, 7.1 Hz, 1H), 5.09–5.15 (m, 2H), 5.0 (s, 2H), 2.66–2.77 (m, 2H), 2.43 (ddt, *J* = 13.9, 7.1, 1.2 Hz, 1H), 2.26 (ddt, *J* = 13.9, 7.7, 1.2 Hz, 1H), 1.87 (ddd, *J* = 14.3, 8.5, 5.9 Hz, 1H), 1.60 (ddd, *J* = 14.3, 7.0, 5.7 Hz, 1H), 1.21 (s, 3H); <sup>13</sup>C NMR (125 MHz, CDCl<sub>3</sub>) δ 173.4, 168.1, 133.9, 132.3, 130.3, 129.2, 128.5, 119.9, 78.0, 43.1, 42.3, 29.7, 27.6, 23.1; IR (Neat Film NaCl) 3067, 2974, 2935, 1740, 1703, 1700, 1456, 1172, 978, 748 cm<sup>-1</sup>; HRMS (MM: ESI-APCI) *m/z* calc'd for C<sub>16</sub>H<sub>20</sub>NO<sub>3</sub> [M+H]<sup>+</sup>: 274.1438, found 274.1437; [α]<sub>D</sub><sup>25.0</sup> -58.59 (c 1.26, CHCl<sub>3</sub>, 96% ee); Thar SFC conditions: 5% MeOH in CO<sub>2</sub>, 3 mL/min, Chiralcel OJ-H column, λ = 210 nm, *t<sub>r</sub>* (min): major = 4.03, minor = 3.64.

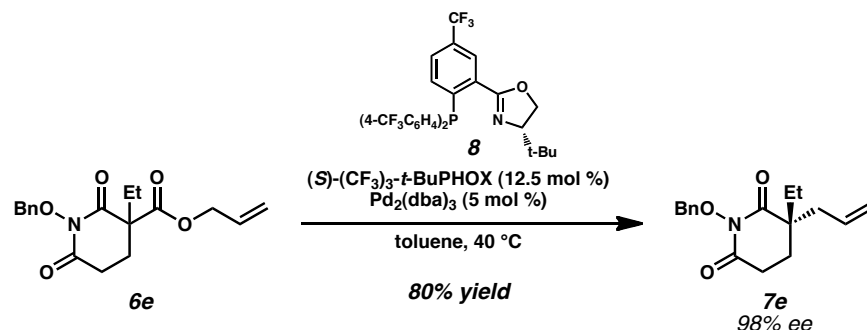

***N*-Benzyloxy imide 7e.** Prepared in a manner analogous to lactam **5h** using *N*-benzyloxy imide **6e** as starting material. *N*-Benzyloxy imide **7e** was isolated after flash column chromatography ( $\text{SiO}_2$ , 20% EtOAc in hexanes) as a colorless oil (80% yield);  $R_f = 0.20$  (20% EtOAc in hexanes);  $^1\text{H}$  NMR (500 MHz,  $\text{CDCl}_3$ )  $\delta$  7.51 (m, 2H), 7.36 (m, 3H), 5.63 (dddd,  $J = 17.3, 10.3, 7.7, 6.9$  Hz, 1H), 5.08–5.10 (m, 2H), 4.99 (s, 2H), 2.67–2.76 (m, 2H), 2.46 (ddt,  $J = 14.0, 6.9, 1.3$  Hz, 1H), 2.27 (ddt,  $J = 14.0, 7.7, 1.1$  Hz, 1H), 1.80 (ddd,  $J = 14.2, 7.9, 6.4$  Hz, 1H), 1.76–1.71 (m, 1H), 1.70 (dq,  $J = 14.2, 7.5$  Hz, 1H), 1.62 (dq,  $J = 14.2, 7.5$  Hz, 1H), 0.86 (t,  $J = 7.5$  Hz, 3 H);  $^{13}\text{C}$  NMR (125 MHz,  $\text{CDCl}_3$ )  $\delta$  172.6, 168.0, 134.0, 132.6, 130.2, 129.2, 128.5, 119.6, 78.0, 46.5, 40.0, 29.5, 28.6, 24.7, 8.2; IR (Neat Film NaCl) 3033, 2972, 1739, 1702, 1699, 1455, 1169, 977, 751  $\text{cm}^{-1}$ ; HRMS (MM: ESI-APCI)  $m/z$  calc'd for  $\text{C}_{17}\text{H}_{22}\text{NO}_3$   $[\text{M}+\text{H}]^+$ : 288.1594, found 288.1591;  $[\alpha]_D^{25.0} -35.98$  (c 1.98,  $\text{CHCl}_3$ , 98% ee); Thar SFC conditions: 1% MeOH in  $\text{CO}_2$ , 2.5 mL/min, Chiralcel OB-H column,  $\lambda = 210$  nm,  $t_R$  (min): major = 14.34, minor = 13.39.

## Procedures for the Preparation of Enones and Diosphenol Ethers

### Enone and Diosphenol Ether Allylic Alkylation Precursors

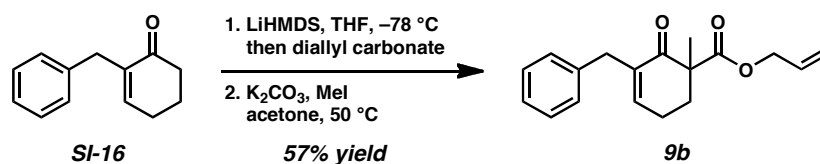

**Enone 9b.** A 25 mL round-bottom flask equipped with a magnetic stir bar was cycled into a glove box, loaded with LiHMDS (527.6 mg, 3.15 mmol, 2.10 equiv), removed from the glove box, and connected to an Ar-filled manifold. The flask was charged with THF (1 mL) and lowered into a  $0$  °C bath (ice/water). Enone **SI-16**<sup>15</sup> (279.0 mg, 1.50 mmol, 1.00 equiv) was cannula transferred slowly from a scintillation vial to the flask using several THF rinses (1 x 4 mL + 2 x 0.5 mL, total added = 6 mL, 0.25 M), generating a bright red/pink solution. After the addition was complete, the  $0$  °C bath was removed and the reaction was allowed to warm to room temperature. After 30 min, the flask was lowered back into the  $0$  °C bath and diallyl carbonate (230  $\mu\text{L}$ , 1.60 mmol, 1.07 equiv) was added dropwise, generating an orange solution. The bath was allowed to expire overnight. After 18 h, the reaction was quenched with sat.  $\text{NH}_4\text{Cl}$  sol. (10 mL) and transferred to a separatory funnel where the aqueous layer was extracted five times with  $\text{Et}_2\text{O}$ . The combined organics (75 mL) were dried over  $\text{MgSO}_4$ , filtered, and concentrated under reduced pressure. The resulting crude oil was purified by flash column chromatography ( $\text{SiO}_2$ , 21 x 2 cm, 100% hexanes  $\rightarrow$  5%  $\rightarrow$  10% EtOAc in hexanes) to afford a yellow oil.

The resulting yellow oil (285.8 mg, 1.06 mmol, 1.00 equiv) was transferred to an Ar-filled 25 mL Schlenk bomb (14/20 joint off of an 8 mm Kontes valve) equipped with a magnetic stir bar using several acetone rinses (1 x 1.5 mL + 3 x 0.5 mL, total added = 3 mL, 0.35 M).  $K_2CO_3$  (292.7 mg, 2.12 mmol, 2.00 equiv) and methyl iodide (180  $\mu$ L, 2.89 mmol, 2.73 equiv) were added to the bomb. The Kontes valve was sealed, the bomb was lowered into a preheated oil bath (50 °C), and the reaction was stirred vigorously. After 11 hours,  $^1H$  NMR analysis indicated residual starting material, and consequently more methyl iodide (130  $\mu$ L, total added = 310  $\mu$ L, 4.98 mmol, 4.71 equiv) was added. After an additional 8.5 hours, no starting material remained by  $^1H$  NMR analysis. Subsequently, the bomb was removed from the oil bath and allowed to cool to room temperature. The reaction contents were filtered through a celite plug rinsing with  $CH_2Cl_2$  and concentrated under reduced pressure. The resulting crude oil was purified by flash column chromatography ( $SiO_2$ , 26.5 x 1.5 cm, 100% hexanes $\rightarrow$ 5% EtOAc in hexanes) to afford enone **9b** (271.2 mg, 0.954 mmol, 64% yield over two steps, 90% purity) as a yellow oil. This yellow oil was diluted in EtOAc (50 mg/mL) and purified further by preparative HPLC (10% EtOAc in hexanes) to afford analytically pure enone **9b** (242.8 mg, 0.851 mmol, 57% yield over two steps) as a pale yellow oil;  $R_f$  = 0.59 (30% EtOAc in hexanes);  $^1H$  NMR (500 MHz,  $CDCl_3$ )  $\delta$  7.29–7.25 (m, 2H), 7.21–7.14 (m, 3H), 6.50–6.45 (m, 1H), 5.78 (ddt,  $J$  = 17.2, 10.5, 5.6 Hz, 1H), 5.24 (dq,  $J$  = 17.2, 1.5 Hz, 1H), 5.19 (dq,  $J$  = 10.5, 1.1 Hz, 1H), 4.53 (dm,  $J$  = 5.6 Hz, 2H), 3.58 (dq,  $J$  = 15.7, 1.7 Hz, 1H), 3.51 (dq,  $J$  = 15.6, 1.7 Hz, 1H), 2.52–2.40 (m, 2H), 2.34–2.24 (m, 1H), 1.94–1.86 (m, 1H), 1.40 (s, 3H);  $^{13}C$  NMR (125 MHz,  $CDCl_3$ )  $\delta$  196.6, 172.6, 145.1, 139.5, 138.8, 131.8, 129.3, 128.5, 126.2, 118.4, 65.8, 53.6, 36.0, 33.7, 23.6, 20.6; IR (Neat Film NaCl) 3084, 3061, 3027, 2980, 2934, 1734, 1685, 1603, 1496, 1453, 1430, 1375, 1292, 1246, 1166, 1111, 1077, 1029, 984, 747  $cm^{-1}$ ; HRMS (MM: ESI-APCI)  $m/z$  calc'd for  $C_{18}H_{21}O_3$   $[M+H]^+$ : 285.1485, found 285.1482.

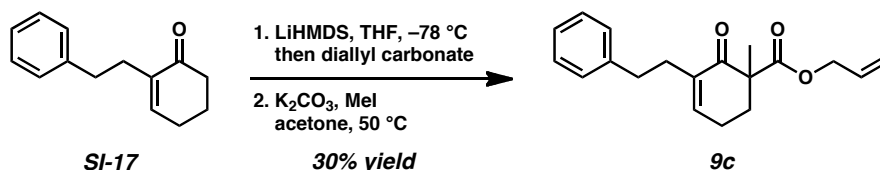

**Enone 9c.** A 25 mL round-bottom flask equipped with a magnetic stir bar was cycled into a glove box, loaded with LiHMDS (215.6 mg, 1.29 mmol, 2.12 equiv), removed from the glove box, and connected to an Ar-filled manifold. The flask was charged with THF (0.5 mL) and lowered into a 0 °C bath (ice/water). Enone **SI-17**<sup>15</sup> (122.0 mg, 0.609 mmol, 1.00 equiv) was cannula transferred slowly from a scintillation vial to the flask using several THF rinses (1 x 1 mL + 2 x 0.5 mL, total added = 2.5 mL, 0.24 M), generating a bright pink solution. After the addition was complete, the 0 °C bath was removed and the reaction was allowed to warm to room temperature. After 30 min, the flask was lowered back into the 0 °C bath and diallyl carbonate (100  $\mu$ L, 0.697 mmol, 1.14 equiv) was added dropwise. The bath was allowed to expire overnight. After 18 h, the reaction was quenched with sat.  $NH_4Cl$  sol. (5 mL) and transferred to a separatory funnel where the aqueous layer was extracted five times with  $Et_2O$ . The combined organics (70 mL) were dried over  $MgSO_4$ , filtered, and concentrated under reduced pressure. The resulting crude oil was purified by flash column chromatography ( $SiO_2$ , 27 x 1.5 cm, 100% hexanes $\rightarrow$ 5% EtOAc in hexanes) to afford a yellow oil.

The resulting yellow oil (84.6 mg, 0.298 mmol, 1.00 equiv) was transferred to an Ar-filled 25 mL Schlenk bomb (14/20 joint off of an 8 mm Kontes valve) equipped with a magnetic stir bar using several acetone rinses (4 x 0.5 mL, total added = 2 mL, 0.15 M).  $K_2CO_3$  (87.0 mg, 0.630 mmol, 2.12 equiv) and methyl iodide (100  $\mu$ L, 1.61 mmol, 5.40 equiv) were added to the bomb.

The Kontes valve was sealed, the bomb was lowered into a preheated oil bath (50 °C), and the reaction was stirred vigorously. After 16 hours, <sup>1</sup>H NMR analysis indicated residual starting material, and consequently more Methyl iodide (130 μL, total added = 310 μL, 4.98 mmol, 4.71 equiv) was added. After an additional 8.5 hours, no starting material remained by <sup>1</sup>H NMR analysis. Subsequently, the bomb was removed from the oil bath and allowed to cool to room temperature. The reaction contents were filtered through a celite plug rinsing with CH<sub>2</sub>Cl<sub>2</sub> and concentrated under reduced pressure. The resulting crude oil was purified by flash column chromatography (SiO<sub>2</sub>, 28 x 1.5 cm, 100% hexanes→2% EtOAc in hexanes) to afford enone **9c** (75.6 mg, 0.253 mmol, 42% yield over two steps, 80% purity) as a yellow oil. This yellow oil was diluted with EtOAc (50 mg/mL) and purified further by preparative HPLC (10% EtOAc in hexanes, 50 mL/min) to afford analytically pure enone **9c** (54.1 mg, 0.181 mmol, 30% yield over two steps) as a pale yellow oil; *R<sub>f</sub>* = 0.67 (30% EtOAc in hexanes); <sup>1</sup>H NMR (500 MHz, CDCl<sub>3</sub>) δ 7.29–7.24 (m, 2H), 7.20–7.15 (m, 3H), 6.53 (ddq, *J* = 4.6, 3.3, 1.0 Hz, 1H), 5.87 (ddt, *J* = 17.2, 10.5, 5.6 Hz, 1H), 5.29 (dq, *J* = 17.2, 1.5 Hz, 1H), 5.22 (dq, *J* = 10.5, 1.3 Hz, 1H), 4.65–4.57 (m, 2H), 2.74 (ddd, *J* = 13.4, 9.7, 6.1 Hz, 1H), 2.67 (ddd, *J* = 13.4, 9.3, 6.1 Hz, 1H), 2.57 (dddq, *J* = 13.8, 9.2, 6.4, 1.5 Hz, 1H), 2.52–2.37 (m, 2H), 2.29 (qt, *J* = 4.9, 1.3 Hz, 1H), 2.25 (ddt, *J* = 9.9, 4.8, 1.3 Hz, 1H), 1.88 (ddd, *J* = 13.4, 8.4, 5.3 Hz, 1H), 1.41 (s, 3H); <sup>13</sup>C NMR (125 MHz, CDCl<sub>3</sub>) δ 196.9, 172.7, 144.5, 142.0, 138.2, 131.8, 128.7, 128.4, 126.0, 118.5, 65.8, 53.6, 34.9, 33.6, 32.5, 23.5, 20.6; IR (Neat Film NaCl) 3026, 2930, 1733, 1683, 1603, 1495, 1456, 1377, 1244, 1167, 1109, 985, 931, 748 cm<sup>-1</sup>; HRMS (MM: ESI-APCI) *m/z* calc'd for C<sub>19</sub>H<sub>23</sub>O<sub>3</sub> [M+H]<sup>+</sup>: 299.1642, found 299.1638.

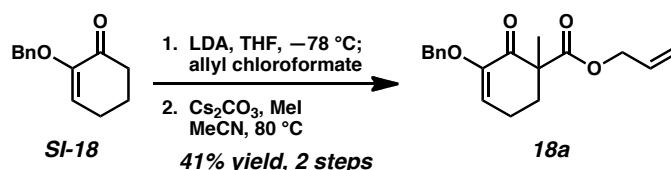

**β-ketoester 18a.** Diisopropylamine (390 μL, 2.78 mmol, 4.46 equiv) in a 10 mL round-bottom flask equipped with a magnetic stir bar was taken up in 2.0 mL THF and lowered into a 0 °C bath (ice/water). To the stirring solution was added *n*-butyl lithium (4.7 M solution in hexanes, 0.583 mL, 2.74 mmol, 4.40 equiv). This solution was stirred for 30 min before transferring the flask to a -78 °C bath (dry ice/acetone) and stirring the mixture for another 15 minutes. Benzyl diosphenol ether **SI-18**<sup>16</sup> (126 mg, 0.623 mmol, 1.00 equiv) in 1.1 mL THF (total = 3.1 mL, 0.2 M) was added dropwise by syringe and the solution was stirred for 2 h. Allyl cyanoformate (270 μL, 2.49 mmol, 4.00 equiv) was added dropwise by syringe, and the reaction was stirred for 8 h until analysis by TLC showed complete consumption of starting material. The reaction was diluted with 2 mL EtOAc and quenched with 1.5 mL each saturated aqueous NH<sub>4</sub>Cl and water. The -78 °C bath was removed and the biphasic mixture was warmed to room temperature. The mixture was transferred to a separatory funnel and the phases were separated. The aqueous phase was extracted twice with EtOAc (5 mL). The combined organic phases were dried over MgSO<sub>4</sub>, filtered and concentrated under reduced pressure. The resulting crude yellow oil was taken up in acetonitrile (2.0 mL, 0.3 M) in a flame-dried 2-dram vial equipped with a magnetic stir bar. Cs<sub>2</sub>CO<sub>3</sub> (264 mg, 0.810 mmol, 1.30 equiv) and methyl iodide (116 μL, 1.86 mmol, 3.00 equiv) were added and the reaction was blanketed under argon and sealed with a Teflon-lined cap. The vial was placed in a heating block (80 °C) and stirred for 8 h until analysis by TLC showed complete consumption of starting material. The reaction was diluted with 5 mL EtOAc, filtered and concentrated under reduced pressure. The resulting crude oil was purified by flash column chromatography (SiO<sub>2</sub>, 12 x 1.5 cm, 20% Et<sub>2</sub>O in hexanes) to afford β-ketoester **18a** (77

mg, 0.26 mmol, 41% yield over two steps) as a colorless oil;  $R_f = 0.34$  (40% Et<sub>2</sub>O in hexanes); <sup>1</sup>H NMR (500 MHz, CDCl<sub>3</sub>) δ 7.41–7.29 (m, 5H), 5.93–5.79 (m, 2H), 5.30 (dq,  $J = 17.2, 1.6$  Hz, 1H), 5.23 (dq,  $J = 10.5, 1.3$  Hz, 1H), 4.95–4.83 (m, 2H), 4.67–4.52 (m, 2H), 2.50–2.41 (m, 2H), 2.39–2.27 (m, 1H), 1.96–1.83 (m, 1H), 1.46 (s, 3H); <sup>13</sup>C NMR (125 MHz, CDCl<sub>3</sub>) δ 192.0, 172.3, 149.7, 136.7, 131.7, 128.6, 128.0, 127.3, 118.8, 118.5, 70.1, 65.9, 54.3, 33.7, 21.7, 20.6; IR (Neat Film NaCl) 3394, 2916, 2167, 1996, 1692, 1627, 1455, 1251, 1153, 1110, 1056 cm<sup>-1</sup>; HRMS (MM: ESI-APCI)  $m/z$  calc'd for C<sub>18</sub>H<sub>20</sub>O<sub>4</sub> [M+H]<sup>+</sup>: 301.1434, found 301.1422.

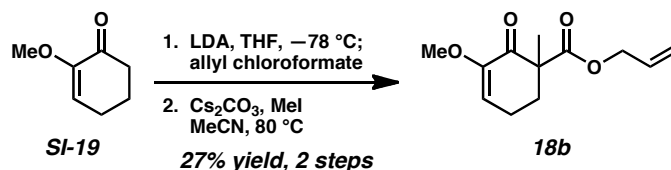

**Diosphenol ether 18b.** Prepared from SI-19<sup>17</sup> in an analogous manner to 18a. Purified by flash chromatography (SiO<sub>2</sub>, 15 x 3 cm, 20→40% Et<sub>2</sub>O in hexanes) to afford diosphenol ether 18b (57 mg, 0.25 mmol, 27% yield over two steps) as a colorless oil;  $R_f = 0.54$  (50% EtOAc in hexanes); <sup>1</sup>H NMR (500 MHz, CDCl<sub>3</sub>) δ 5.96–5.80 (m, 1H), 5.78 (d,  $J = 4.5$  Hz, 1H), 5.27 (dq,  $J = 17.2, 1.6$  Hz, 1H), 5.20 (dq,  $J = 10.5, 1.3$  Hz, 1H), 4.67–4.55 (m, 2H), 3.60 (s, 3H), 2.56–2.43 (m, 2H), 2.42–2.32 (m, 1H), 1.95–1.85 (m, 1H), 1.43 (s, 3H); <sup>13</sup>C NMR (125 MHz, CDCl<sub>3</sub>) δ 192.0, 172.2, 150.7, 131.7, 118.4, 115.2, 65.9, 55.2, 54.3, 33.9, 21.5, 20.6; IR (Neat Film NaCl) 2936, 2839, 1734, 1696, 1631, 1455, 1378, 1365, 1252, 1231, 1174, 1110, 1081, 1064, 979, 935, 824 cm<sup>-1</sup>; HRMS (MM: ESI-APCI+)  $m/z$  calc'd for C<sub>12</sub>H<sub>17</sub>O<sub>4</sub> [M+H]<sup>+</sup>: 225.1121, found 225.1122.

### Diosphenol Ether and Enone Allylic Alkylation Products

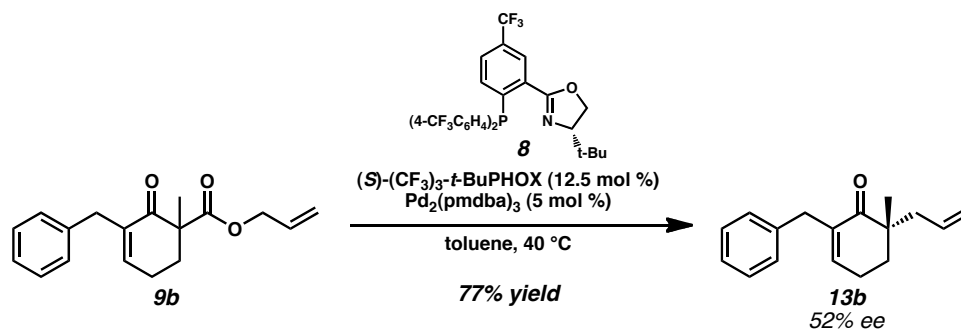

**Enone 13b.** Prepared from 9b in an analogous manner to 19a. Purified by flash column chromatography (SiO<sub>2</sub>, 12 x 2 cm, 10→20% Et<sub>2</sub>O in hexanes) to afford enone 13b (68 mg, 0.28 mmol, 77% yield) as a colorless oil and recovered enone 9b (19 mg, 18% recovered);  $R_f = 0.70$  (40% Et<sub>2</sub>O in hexanes); <sup>1</sup>H NMR (500 MHz, CDCl<sub>3</sub>) δ 7.31–7.20 (m, 2H), 7.23–7.10 (m, 3H), 6.46 (d,  $J = 4.0$  Hz, 1H), 5.75–5.60 (m, 1H), 5.08–4.93 (m, 2H), 3.50 (dq,  $J = 3.3, 1.6$  Hz, 2H), 2.41–2.23 (m, 3H), 2.16 (ddt,  $J = 13.7, 7.6, 1.2$  Hz, 1H), 1.89 (ddd,  $J = 13.7, 6.4, 5.5$  Hz, 1H), 1.74 (ddd,  $J = 13.6, 6.9, 5.5$  Hz, 1H), 1.06 (s, 3H); <sup>13</sup>C NMR (125 MHz, CDCl<sub>3</sub>) δ 203.06, 144.55, 140.04, 137.98, 134.25, 129.19, 128.45, 126.11, 118.09, 44.49, 41.21, 36.03, 33.41, 23.03, 21.90; IR (Neat Film NaCl) 3063, 3027, 2964, 2924, 1668, 1640, 1495, 1453, 1430, 1376, 1174, 1077, 996, 915, 749 cm<sup>-1</sup>;  $[\alpha]_D^{25.0} -200.23$  (c 3.86, CHCl<sub>3</sub>, 52% ee); HRMS (MM: ESI-APCI+)  $m/z$  calc'd for C<sub>17</sub>H<sub>20</sub>O [M+H]<sup>+</sup>: 241.1587, found 241.1575; JASCO SFC conditions: 3% MeOH in CO<sub>2</sub>, 5 mL/min, Chiralcel OJ-H column, λ = 210 nm, t<sub>R</sub> (min): major = 2.40, minor = 2.11.

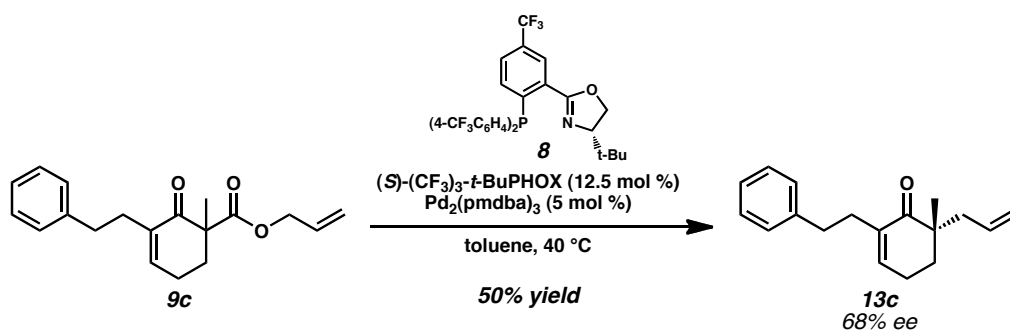

**Enone 13b.** Prepared from **9c** in an analogous manner to **19a**. Purified by flash column chromatography ( $\text{SiO}_2$ , 12 x 2 cm, 10 $\rightarrow$ 20%  $\text{Et}_2\text{O}$  in hexanes) to afford enone **13c** (17 mg, 67  $\mu\text{mol}$ , 50% yield) as a colorless oil and recovered enone **9c** (8 mg, 20% recovered);  $R_f = 0.73$  (40%  $\text{Et}_2\text{O}$  in hexanes);  $^1\text{H NMR}$  (500 MHz,  $\text{CDCl}_3$ )  $\delta$  7.32–7.21 (m, 2H), 7.22–7.13 (m, 3H), 6.50 (t,  $J = 4.1$  Hz, 1H), 5.74 (ddt,  $J = 16.8, 10.3, 7.4$  Hz, 1H), 5.12–5.00 (m, 2H), 2.76–2.62 (m, 2H), 2.59–2.41 (m, 2H), 2.40–2.12 (m, 4H), 1.89 (ddd,  $J = 13.6, 6.7, 5.5$  Hz, 1H), 1.72 (ddd,  $J = 13.6, 6.7, 5.5$  Hz, 1H), 1.07 (s, 3H);  $^{13}\text{C NMR}$  (125 MHz,  $\text{CDCl}_3$ )  $\delta$  203.4, 144.2, 142.1, 137.4, 134.4, 128.7, 128.3, 125.9, 118.1, 44.4, 41.3, 35.2, 33.4, 32.4, 23.0, 22.0; IR (Neat Film NaCl) 3062, 3026, 2962, 2924, 2855, 1669, 1639, 1496, 1453, 1430, 1377, 1175, 1078, 995, 914, 747  $\text{cm}^{-1}$ ;  $[\alpha]_D^{25.0} -32.55$  (c 1.24,  $\text{CHCl}_3$ , 68% ee); HRMS (MM: ESI-APCI+)  $m/z$  calc'd for  $\text{C}_{18}\text{H}_{22}\text{O}$   $[\text{M}+\text{H}]^+$ : 255.1743, found 255.1730; JASCO SFC conditions: 3% MeOH in  $\text{CO}_2$ , 5 mL/min, Chiralcel OJ-H column,  $\lambda = 210$  nm,  $t_R$  (min): major = 2.41, minor = 2.17.

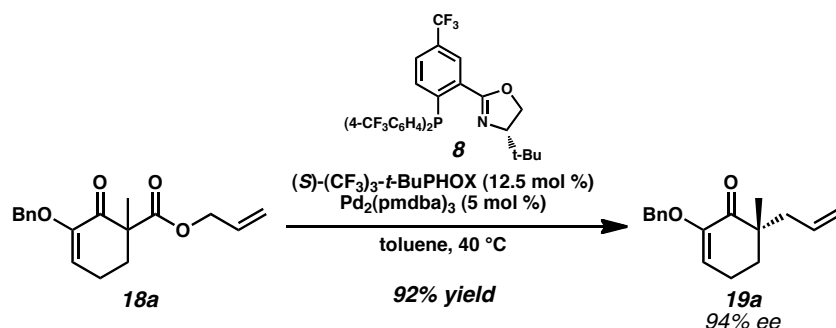

**Diosphenol ether 19a.**  $\text{Pd}_2(\text{pmdba})_3$  (4.2 mg, 3.8  $\mu\text{mol}$ , 5.0 mol %) and  $(S)\text{-(CF}_3)_3\text{-}t\text{-BuPHOX}$  (**8**, 5.7 mg, 9.6  $\mu\text{mol}$ , 12.5 mol %) were added to an oven-dried 2-dram vial equipped with a magnetic stir bar in a glove box. The vial was charged with toluene (1.8 mL) and stirred at ambient temperature (28 °C) for 30 min, resulting in a deep orange solution.  $\beta$ -ketoester **18a** (23 mg, 77  $\mu\text{mol}$ , 1.0 equiv) was transferred to the scintillation vial with toluene (0.5 mL, total = 2.3 mL, 0.033 M), producing a light green solution. The vial was sealed with a Teflon-lined cap and lowered into a heating block (40 °C). After 6 days, the reaction was complete by TLC and colorimetric analysis (the reaction had reverted to an orange color) and was removed from the glove box. The reaction was filtered through a silica gel plug, rinsed with  $\text{Et}_2\text{O}$ , and concentrated under reduced pressure. The crude oil was purified by flash column chromatography ( $\text{SiO}_2$ , 15 x 1.5 cm, 5% $\rightarrow$ 10%  $\text{Et}_2\text{O}$  in hexanes) to afford diosphenol ether **19a** (18 mg, 70  $\mu\text{mol}$ , 92% yield) as a colorless oil;  $R_f = 0.56$  (40%  $\text{Et}_2\text{O}$  in hexanes);  $^1\text{H NMR}$  (500 MHz,  $\text{CDCl}_3$ )  $\delta$  7.39–7.26 (m, 5H), 5.83 (t,  $J = 4.5$  Hz, 1H), 5.74 (ddt,  $J = 16.7, 10.3, 7.4$  Hz, 1H), 5.12–5.03 (m, 2H), 4.85 (s, 2H), 2.42–2.33 (m, 3H), 2.21 (ddt,  $J = 13.8, 7.6, 1.2$  Hz, 1H), 1.89 (ddd,  $J = 13.7, 6.7, 5.6$  Hz, 1H), 1.71 (ddd,  $J = 13.7, 6.6, 5.4$  Hz, 1H), 1.11 (s, 3H);  $^{13}\text{C}$



NMR (125 MHz, CDCl<sub>3</sub>)  $\delta$  198.5, 149.0, 136.8, 134.1, 128.6, 127.9, 127.4, 118.4, 118.0, 70.0, 45.4, 41.2, 33.1, 21.9, 20.9; IR (Neat Film NaCl) 2918, 2360, 1684, 1628, 1457, 1220, 1204, 1094, 1050, 914, 736 cm<sup>-1</sup>;  $[\alpha]_D^{25.0}$  -12.01 (c 0.50, CHCl<sub>3</sub>, 94% ee); HRMS (MM: ESI-APCI)  $m/z$  calc'd for C<sub>17</sub>H<sub>20</sub>O<sub>2</sub> [M+H]<sup>+</sup>: 257.1536, found 257.1529; HPLC conditions: 7% IPA in hexanes, 1 mL/min, Chiralcel OD-H column,  $\lambda$  = 254 nm,  $t_R$  (min): major = 7.24, minor = 8.27.

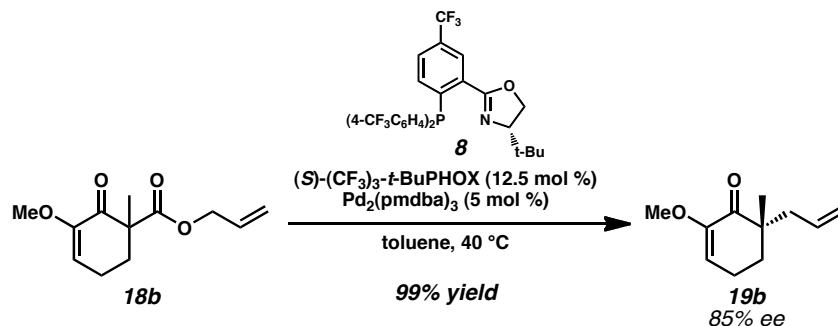

**Diosphenol ether 19b.** Prepared from **18b** in an analogous manner to **19a**. Purified by flash column chromatography (SiO<sub>2</sub>, 10 x 3 cm, 5→10% Et<sub>2</sub>O in hexanes) to afford diosphenol ether **19b** (111 mg, 0.616 mmol, 99% yield) as a colorless oil;  $R_f$  = 0.23 (40% Et<sub>2</sub>O in hexanes); <sup>1</sup>H NMR (500 MHz, CDCl<sub>3</sub>)  $\delta$  5.79–5.65 (m, 2H), 5.12–5.01 (m, 2H), 3.58 (s, 3H), 2.47–2.34 (m, 3H), 2.20 (ddt,  $J$  = 13.7, 7.6, 1.1 Hz, 1H), 1.91 (ddd,  $J$  = 13.7, 6.8, 5.5 Hz, 1H), 1.72 (ddd,  $J$  = 13.7, 6.5, 5.4 Hz, 1H), 1.11 (s, 3H); <sup>13</sup>C NMR (125 MHz, CDCl<sub>3</sub>)  $\delta$  198.6, 150.0, 134.0, 118.4, 114.5, 55.1, 45.4, 41.2, 33.2, 21.9, 20.8; IR (Neat Film NaCl) 2929, 1687, 1631, 1455, 1375, 1225, 1095, 1056, 913 cm<sup>-1</sup>;  $[\alpha]_D^{25.0}$  -27.47 (c 6.00, CHCl<sub>3</sub>, 85% ee); HRMS (MM: ESI-APCI+)  $m/z$  calc'd for C<sub>11</sub>H<sub>17</sub>O<sub>2</sub> [M+H]<sup>+</sup>: 181.1223, found 181.1222; HPLC conditions: 2% IPA in hexanes, 1 mL/min, Chiralcel OD-H column,  $\lambda$  = 254 nm,  $t_R$  (min): major = 13.41, minor = 12.23.

## Methods for the Determination of Enantiomeric Excess

| entry | product                                                                                           | assay conditions                                                                        | retention time of major isomer (min) | retention time of minor isomer (min) | % ee |
|-------|---------------------------------------------------------------------------------------------------|-----------------------------------------------------------------------------------------|--------------------------------------|--------------------------------------|------|
| 1     | 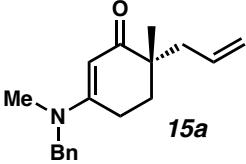<br><b>15a</b>   | SFC<br>Chiralcel OD-H<br>5% MeOH in CO <sub>2</sub><br>isocratic, 5.0 mL/min<br>210 nm  | 10.45                                | 9.60                                 | 81   |
| 2     | <br><b>15b</b>   | SFC<br>Chiralpak AS-H<br>5% MeOH in CO <sub>2</sub><br>isocratic, 5.0 mL/min<br>254 nm  | 8.60                                 | 6.48                                 | 83   |
| 3     | <br><b>15c</b>   | SFC<br>Chiralpak AD-H<br>5% MeOH in CO <sub>2</sub><br>isocratic, 3.0 mL/min<br>254 nm  | 8.45                                 | 10.35                                | 86   |
| 4     | <br><b>15d</b>  | SFC<br>Chiralpak AD-H<br>7% MeOH in CO <sub>2</sub><br>isocratic, 5.0 mL/min<br>210 nm  | 8.04                                 | 8.97                                 | 87   |
| 5     | <br><b>15e</b> | SFC<br>Chiralpak AD-H<br>7% MeOH in CO <sub>2</sub><br>isocratic, 5.0 mL/min<br>210 nm  | 4.04                                 | 2.20                                 | 82   |
| 6     | <br><b>15f</b> | SFC<br>Chiralpak AD-H<br>10% MeOH in CO <sub>2</sub><br>isocratic, 5.0 mL/min<br>210 nm | 5.60                                 | 4.73                                 | 84   |
| 7     | <br><b>17a</b> | SFC<br>Chiralpak AD-H<br>10% MeOH in CO <sub>2</sub><br>isocratic, 3.0 mL/min<br>254 nm | 2.80                                 | 3.13                                 | 84   |
| 8     | <br><b>17b</b> | HPLC<br>Chiralcel OJ<br>10% IPA in hexanes<br>isocratic, 1.0 mL/min<br>210 nm           | 18.77                                | 21.21                                | 86   |

| entry | product                                                                                           | assay conditions                                                                       | retention time of major isomer (min) | retention time of minor isomer (min) | % ee |
|-------|---------------------------------------------------------------------------------------------------|----------------------------------------------------------------------------------------|--------------------------------------|--------------------------------------|------|
| 9     | 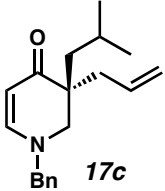<br><b>17c</b>   | HPLC<br>Chiralcel OJ<br>7% IPA in hexanes<br>isocratic, 1.0 mL/min<br>210 nm           | 11.44                                | 14.80                                | 88   |
| 10    | <br><b>17d</b>   | HPLC<br>Chiralpak AD<br>30% IPA in hexanes<br>isocratic, 1.0 mL/min<br>254 nm          | 21.87                                | 18.59                                | 90   |
| 11    | <br><b>5h</b>    | SFC<br>Chiralcel OJ-H<br>1% IPA in CO <sub>2</sub><br>isocratic, 5.0 mL/min<br>222 nm  | 2.53                                 | 2.13                                 | 95   |
| 12    | <br><b>5i</b>   | HPLC<br>Chiralcel OD-H<br>5% IPA in hexanes<br>isocratic, 1.0 mL/min<br>210 nm         | 7.95                                 | 6.52                                 | 96   |
| 13    | <br><b>7c</b>  | HPLC<br>Chiralpak AD<br>3% IPA in hexanes<br>isocratic, 1.0 mL/min<br>210 nm           | 11.94                                | 17.86                                | 76   |
| 14    | <br><b>7d</b>  | SFC<br>Chiralcel OJ-H<br>1% MeOH in CO <sub>2</sub><br>isocratic, 3.0 mL/min<br>210 nm | 4.03                                 | 3.64                                 | 96   |
| 15    | <br><b>7e</b>  | SFC<br>Chiralcel OB-H<br>1% MeOH in CO <sub>2</sub><br>isocratic, 2.5 mL/min<br>210 nm | 14.34                                | 13.39                                | 98   |
| 16    | <br><b>13b</b> | SFC<br>Chiralcel OJ-H<br>3% MeOH in CO <sub>2</sub><br>isocratic, 5.0 mL/min<br>210 nm | 2.40                                 | 2.11                                 | 52   |

| entry | product                                                                                         | assay conditions                                                                       | retention time of major isomer (min) | retention time of minor isomer (min) | % ee |
|-------|-------------------------------------------------------------------------------------------------|----------------------------------------------------------------------------------------|--------------------------------------|--------------------------------------|------|
| 17    | 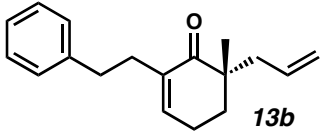<br><b>13b</b> | SFC<br>Chiralcel OJ-H<br>3% MeOH in CO <sub>2</sub><br>isocratic, 5.0 mL/min<br>210 nm | 2.41                                 | 2.17                                 | 68   |
| 18    | <br><b>19a</b> | HPLC<br>Chiralcel OD-H<br>7% IPA in hexanes<br>isocratic, 1.0 mL/min<br>254 nm         | 7.24                                 | 8.27                                 | 94   |
| 19    | <br><b>19b</b> | HPLC<br>Chiralcel OD-H<br>2% IPA in hexanes<br>isocratic, 1.0 mL/min<br>254 nm         | 13.41                                | 12.23                                | 85   |

**References**

- [1] A. M. Pangborn, M. A. Giardello, R. H. Grubbs, R. K. Rosen, F. J. Timmers, *Organometallics* **1996**, *15*, 1518–1520.
- [2] a) K. Tani, D. C. Behenna, R. M. McFadden, B. M. Stoltz, *Org. Lett.* **2007**, *9*, 2529–2531; b) M. R. Krout, J. T. Mohr, B. M. Stoltz, *Org. Synth.* **2009**, *86*, 181–193.
- [3] N. T. McDougal, J. Streuff, H. Mukherjee, S. C. Virgil, B. M. Stoltz, *Tetrahedron Lett.* **2010**, *51*, 5550–5554.
- [4] D. M. X. Donnelly, J.-P. Finet, B. A. Rattigan, *J. Chem. Soc. Perkin Trans. 1* **1993**, 1729–1735.
- [5] A. Y. Hong, M. R. Krout, T. Jensen, N. B. Bennett, A. M. Harned, B. M. Stoltz, *Angew. Chem. Int. Ed.* **2011**, *50*, 2756–2760.
- [6] E. Piers, J. R. Grierson, C. K. Lau, I. Nagakura, *Can. J. Chem.* **1982**, *60*, 210–223.
- [7] A. Kiapars, X. Huang, S. L. Buchwald, *J. Am. Chem. Soc.* **2002**, *124*, 7421–7428.
- [8] a) D. C. Behenna, B. M. Stoltz, *J. Am. Chem. Soc.* **2004**, *126*, 15044–15045; b) J. T. Mohr, D. C. Behenna, A. M. Harned, B. M. Stoltz, *Angew. Chem. Int. Ed.* **2005**, *44*, 6924–6927.
- [9] R. Sebesta, M. G. Pizzuti, A. J. Boersma, A. J. Minnaard, B. L. Feringa, *Chem. Commun.* **2005**, 1711–1713.
- [10] P. Guerry, R. Neier, *Synthesis* **1984**, 485–488.
- [11] (a) A. C. Flick, A. Padwa, *Tetrahedron Lett.* **2008**, *49*, 5739–5741; (b) A. C. Flick, A. Padwa, *ARKIVOC* **2009**, 4–14.
- [12] B. H. Lee, M. F. Clothier and D. A. Pickering, *Tetrahedron Lett.* **1997**, *38*, 6119–6122.
- [13] D. C. Behenna, Y. Liu, T. Yurino, J. Kim, D. E. White, S. C. Virgil, B. M. Stoltz, *Nature Chem.* **2012**, *4*, 130–133.
- [14] C. M. Marson, A. Khan, R. A. Porter, *J. Org. Chem.* **2001**, *66*, 4771–4775.
- [15] E. i. Negishi, Z. Tan, S.-Y. Liou, B. Liao, *Tetrahedron* **2000**, *56*, 10197–10207.
- [16] A. A. Ponaras, Md. Y. Meah, *Tetrahedron Lett.* **1986**, *27*, 4953–4956.
- [17] G. G. Habermehl, I. Wippermann, *Zeitschrift fuer Naturforschung, B.: Chemical Sciences* **1991**, *46*, 1421–1424.

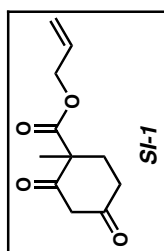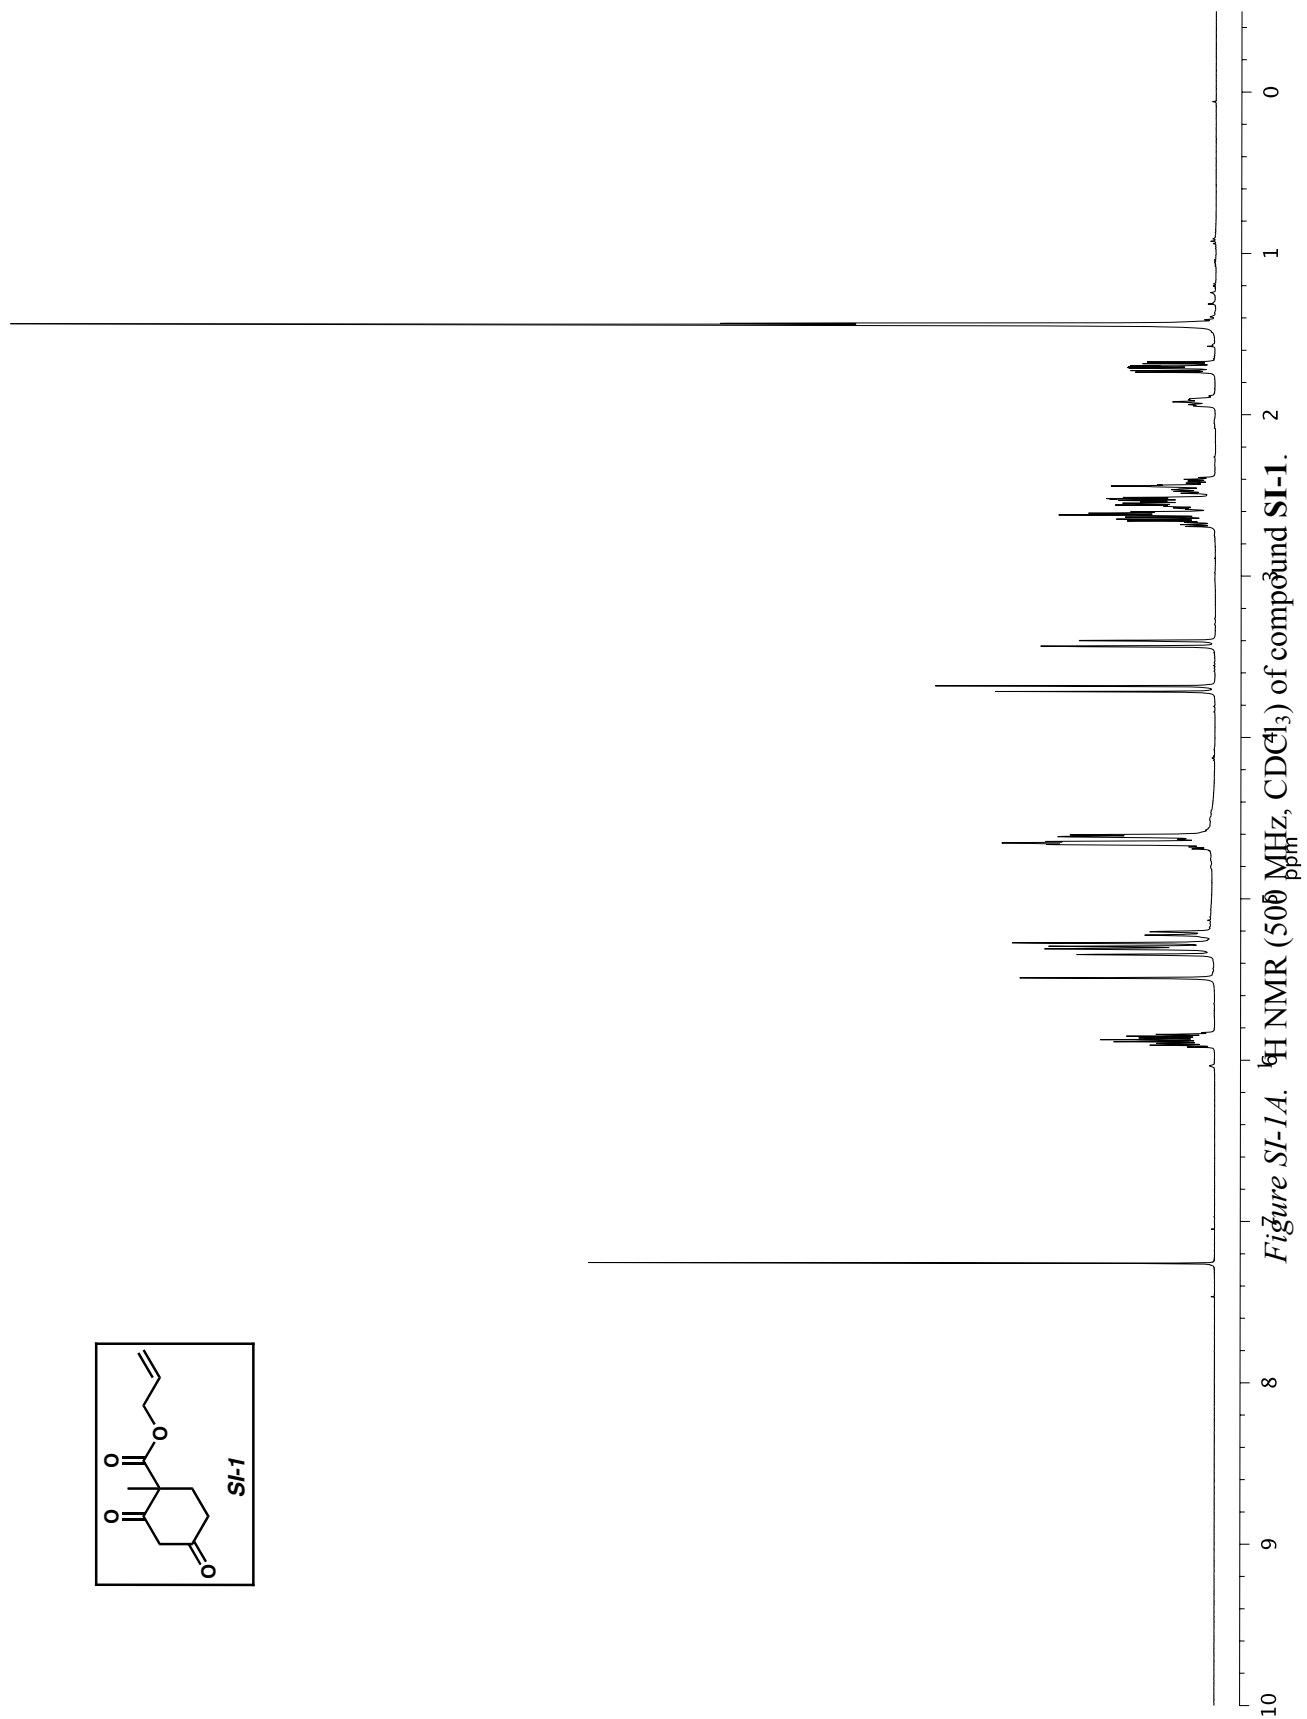

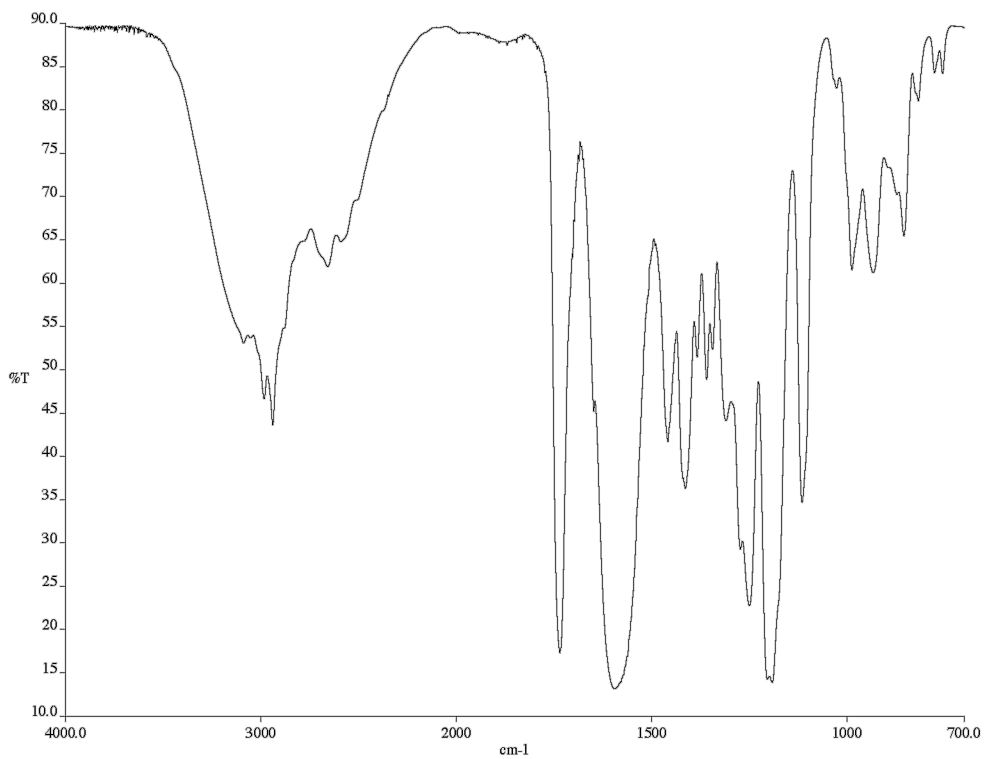

Figure SI-1B. Infrared spectrum (thin film/NaCl) of compound **SI-1**.

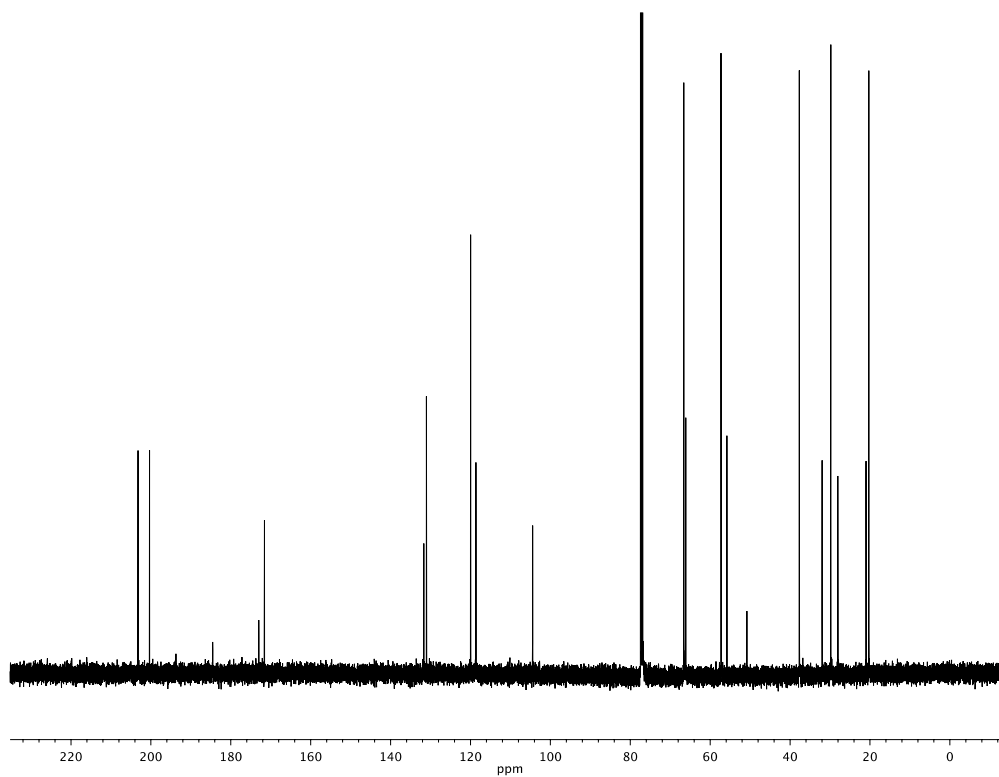

Figure SI-1C.  $^{13}\text{C}$  NMR (125 MHz,  $\text{CDCl}_3$ ) of compound **SI-1**.

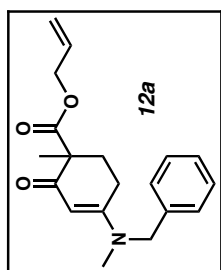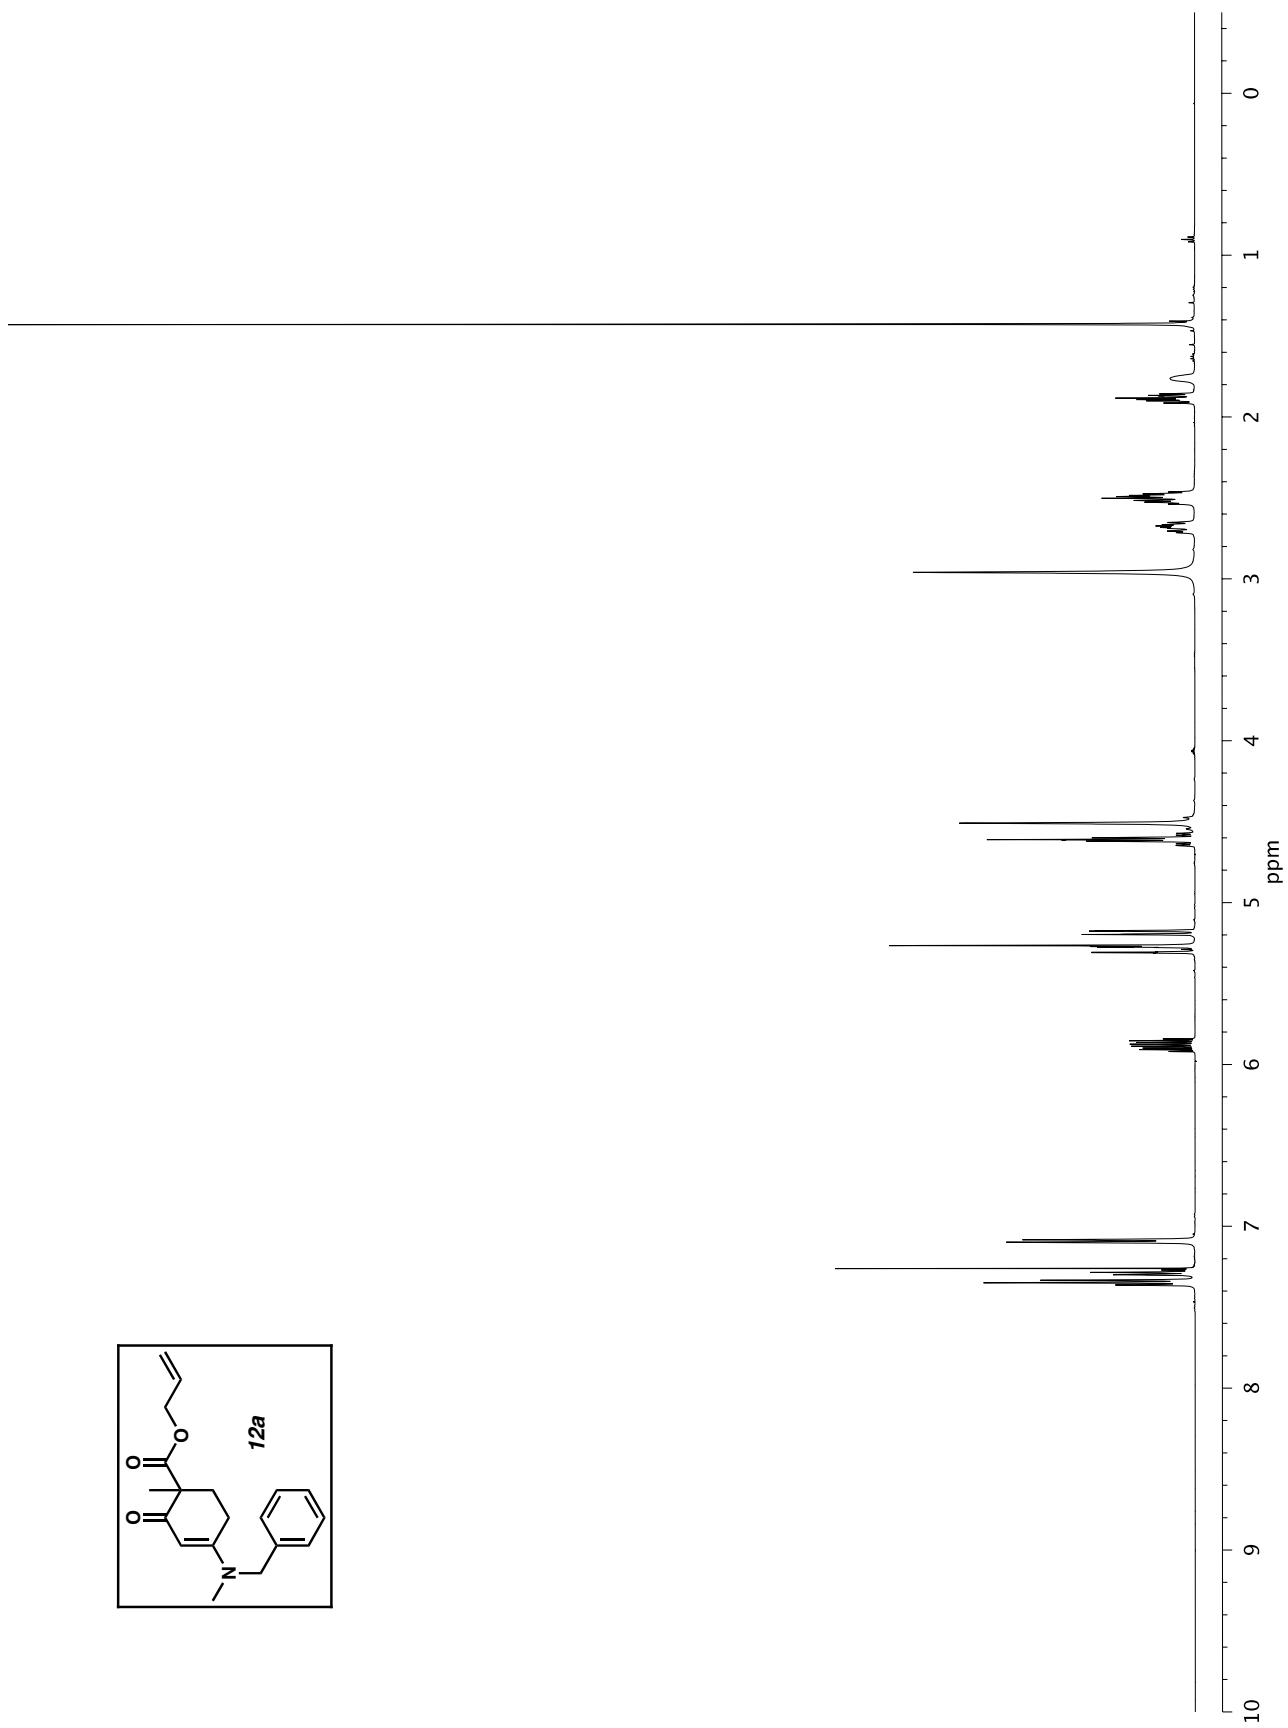

Figure SI-2A. <sup>1</sup>H NMR (500 MHz, CDCl<sub>3</sub>) of compound 12a.



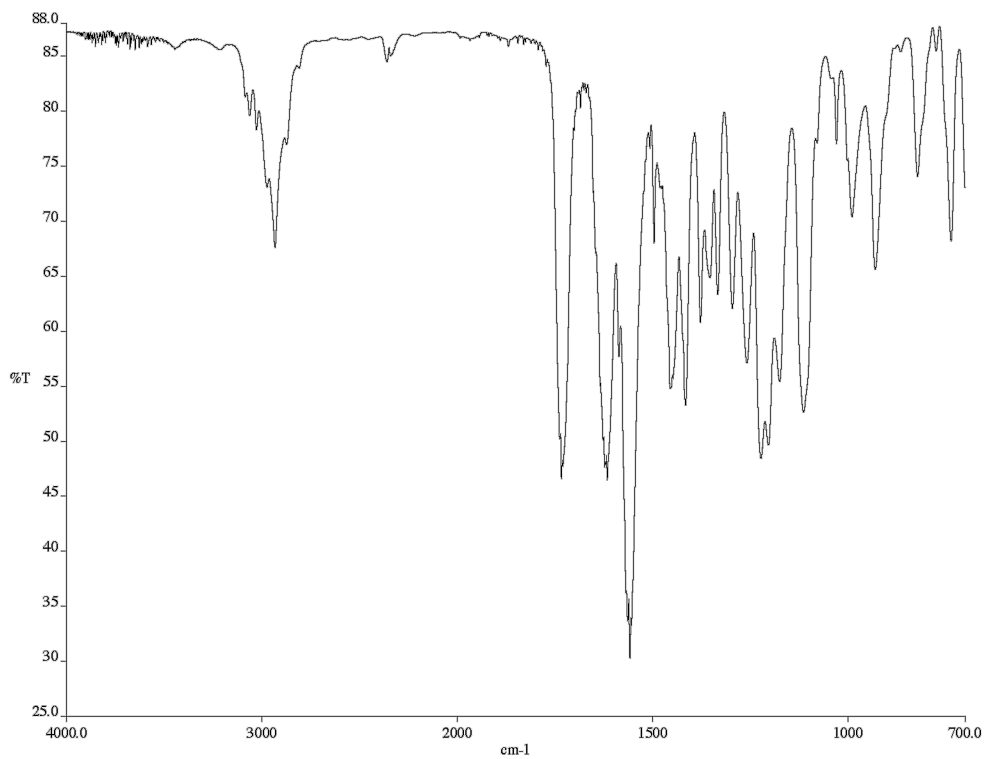

Figure SI-2B. Infrared spectrum (thin film/NaCl) of compound **12a**.

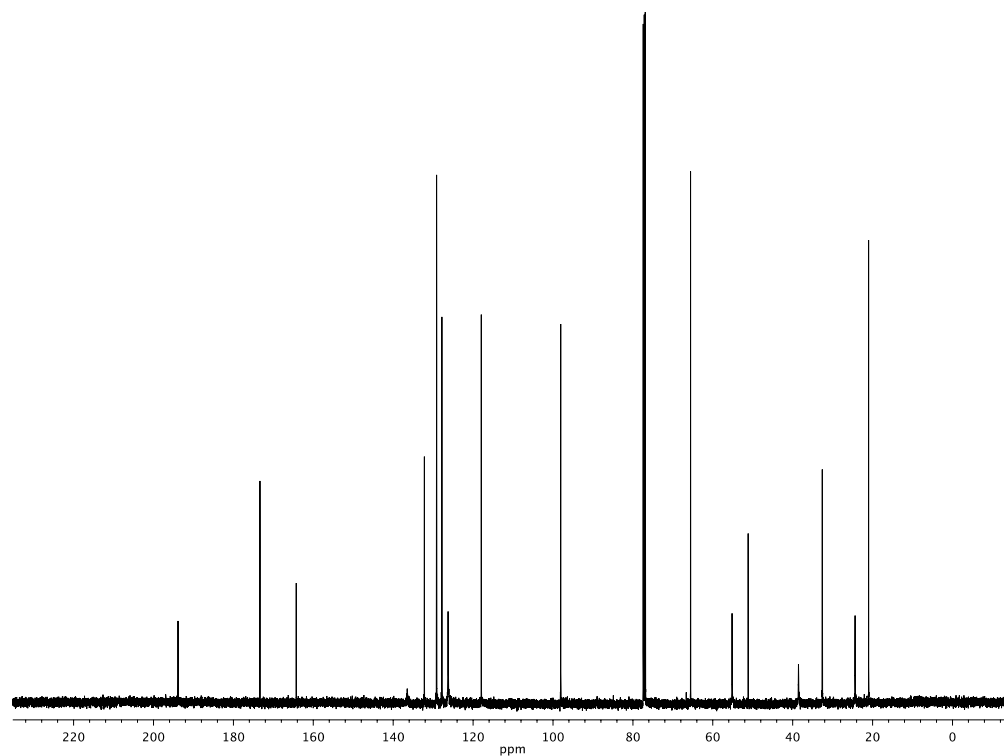

Figure SI-2C.  $^{13}\text{C}$  NMR (125 MHz,  $\text{CDCl}_3$ ) of compound **12a**.

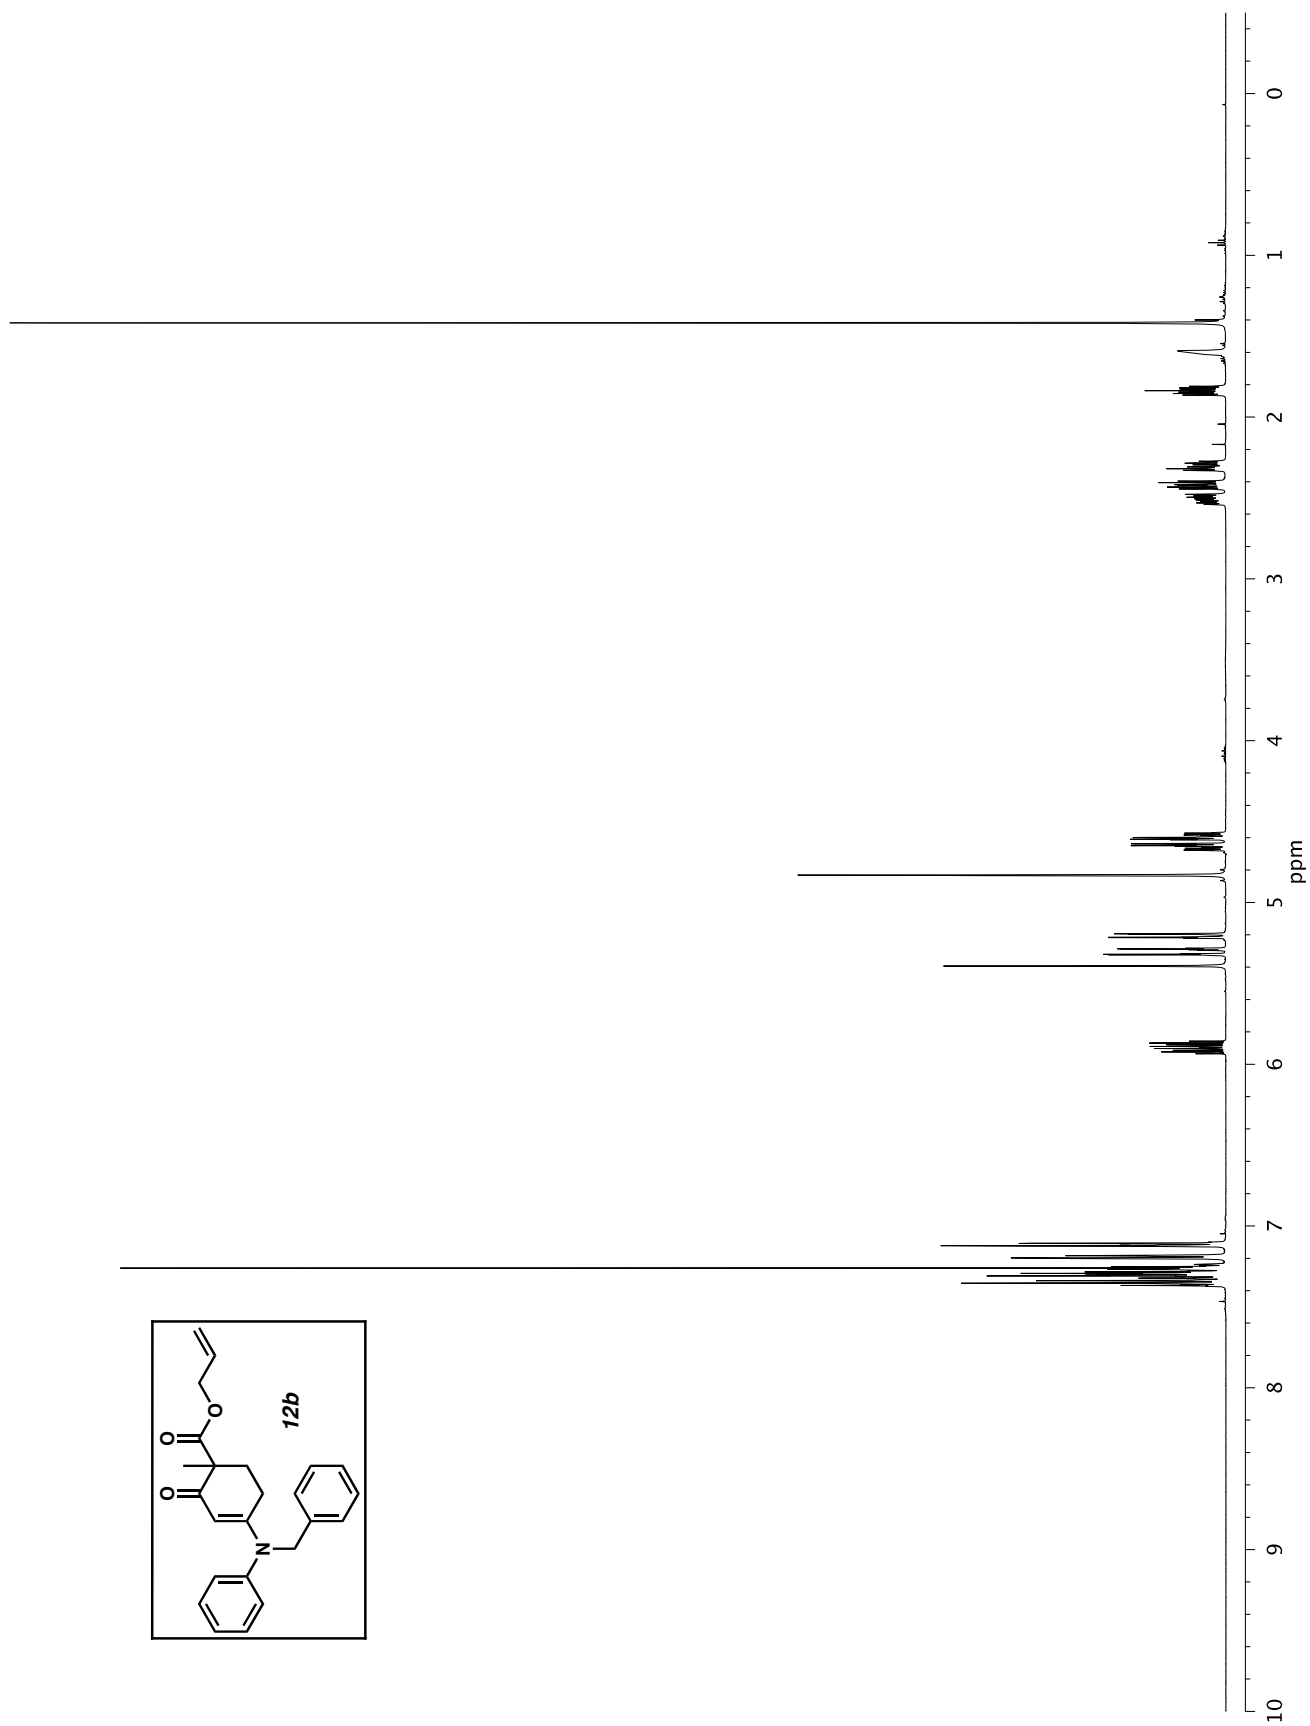

Figure SI-3A.  $^1\text{H}$  NMR (500 MHz,  $\text{CDCl}_3$ ) of compound **12b**.

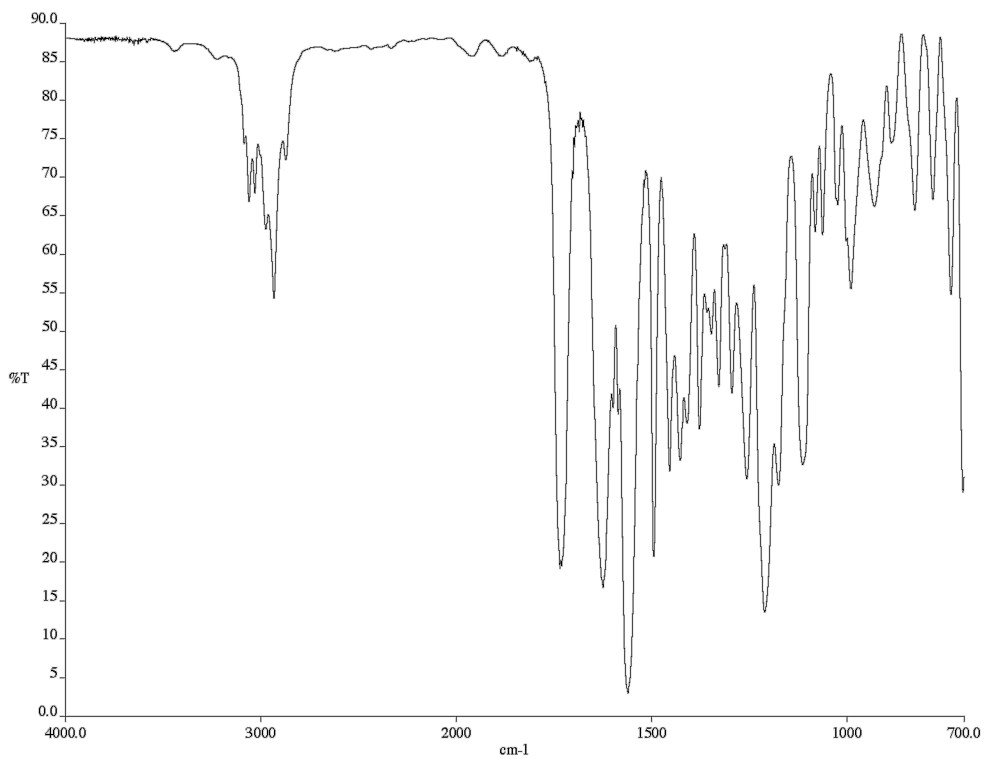

Figure SI-3B. Infrared spectrum (thin film/NaCl) of compound **12b**.

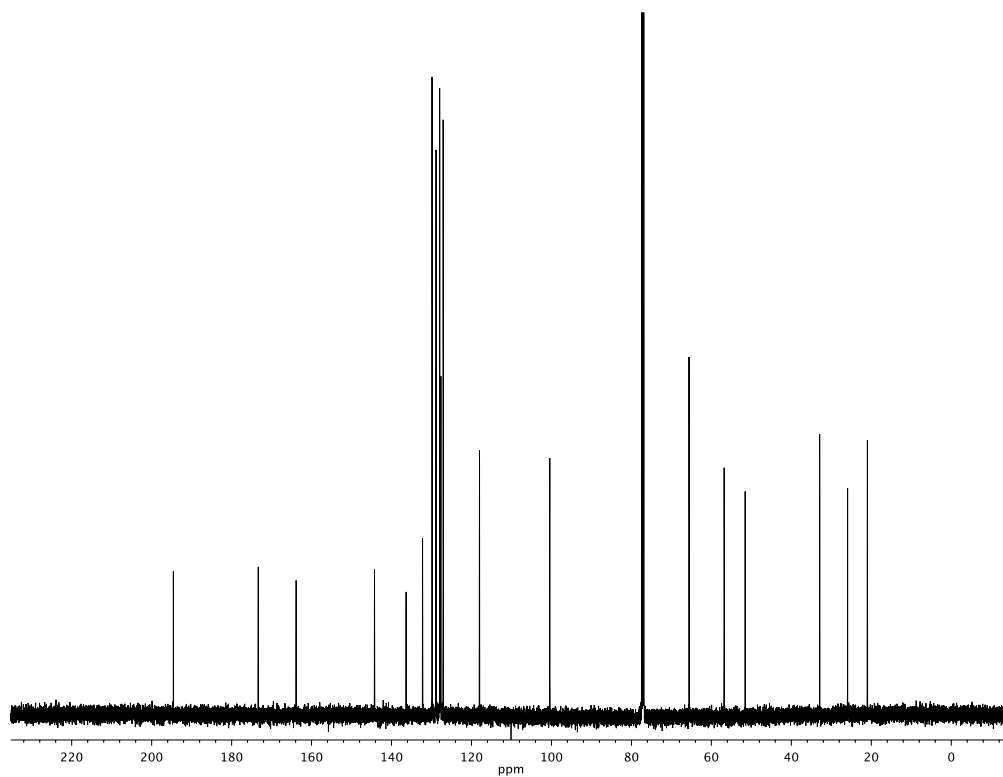

Figure SI-3C.  $^{13}\text{C}$  NMR (125 MHz,  $\text{CDCl}_3$ ) of compound **12b**.

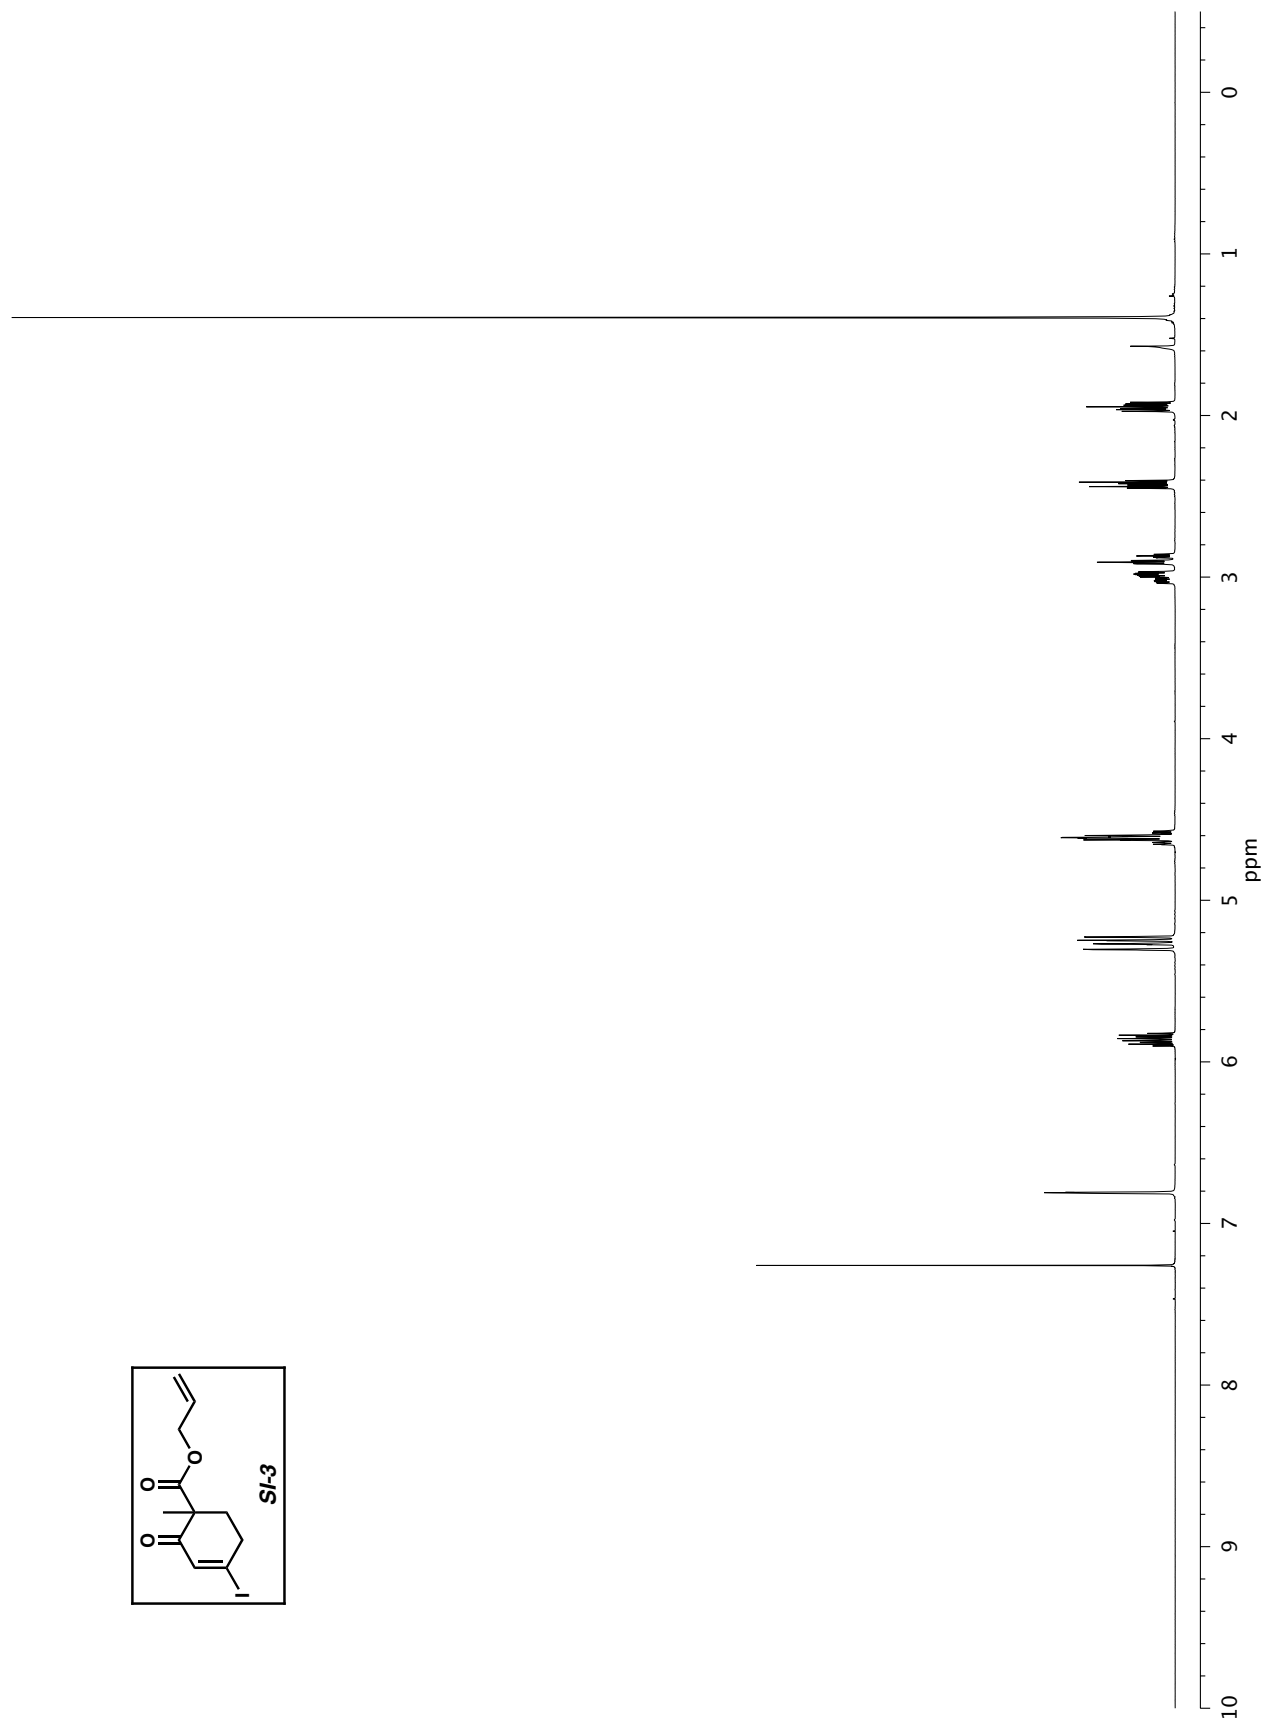

Figure SI-4A. <sup>1</sup>H NMR (500 MHz, CDCl<sub>3</sub>) of compound SI-3.

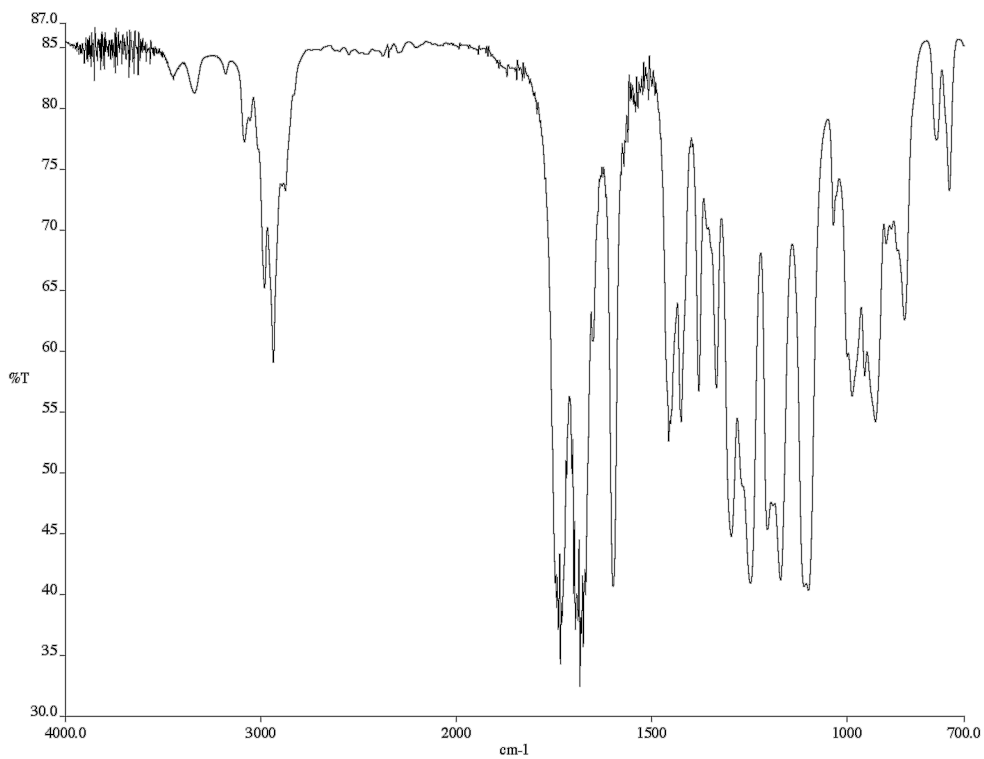

Figure SI-4B. Infrared spectrum (thin film/NaCl) of compound **SI-3**.

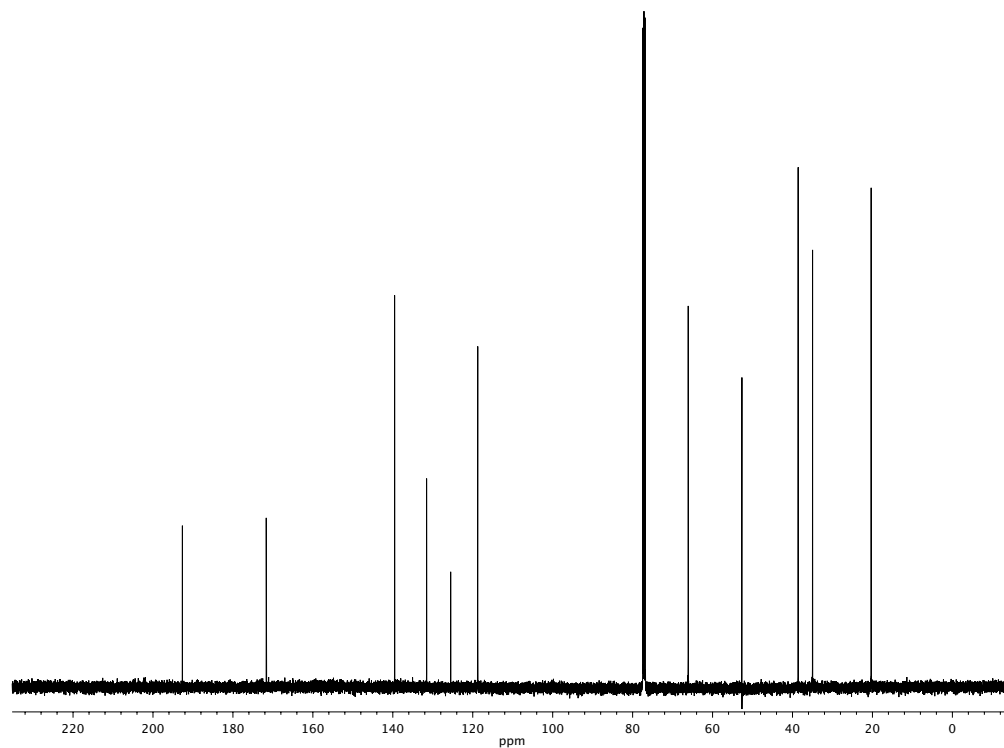

Figure SI-4C. <sup>13</sup>C NMR (125 MHz, CDCl<sub>3</sub>) of compound **SI-3**.

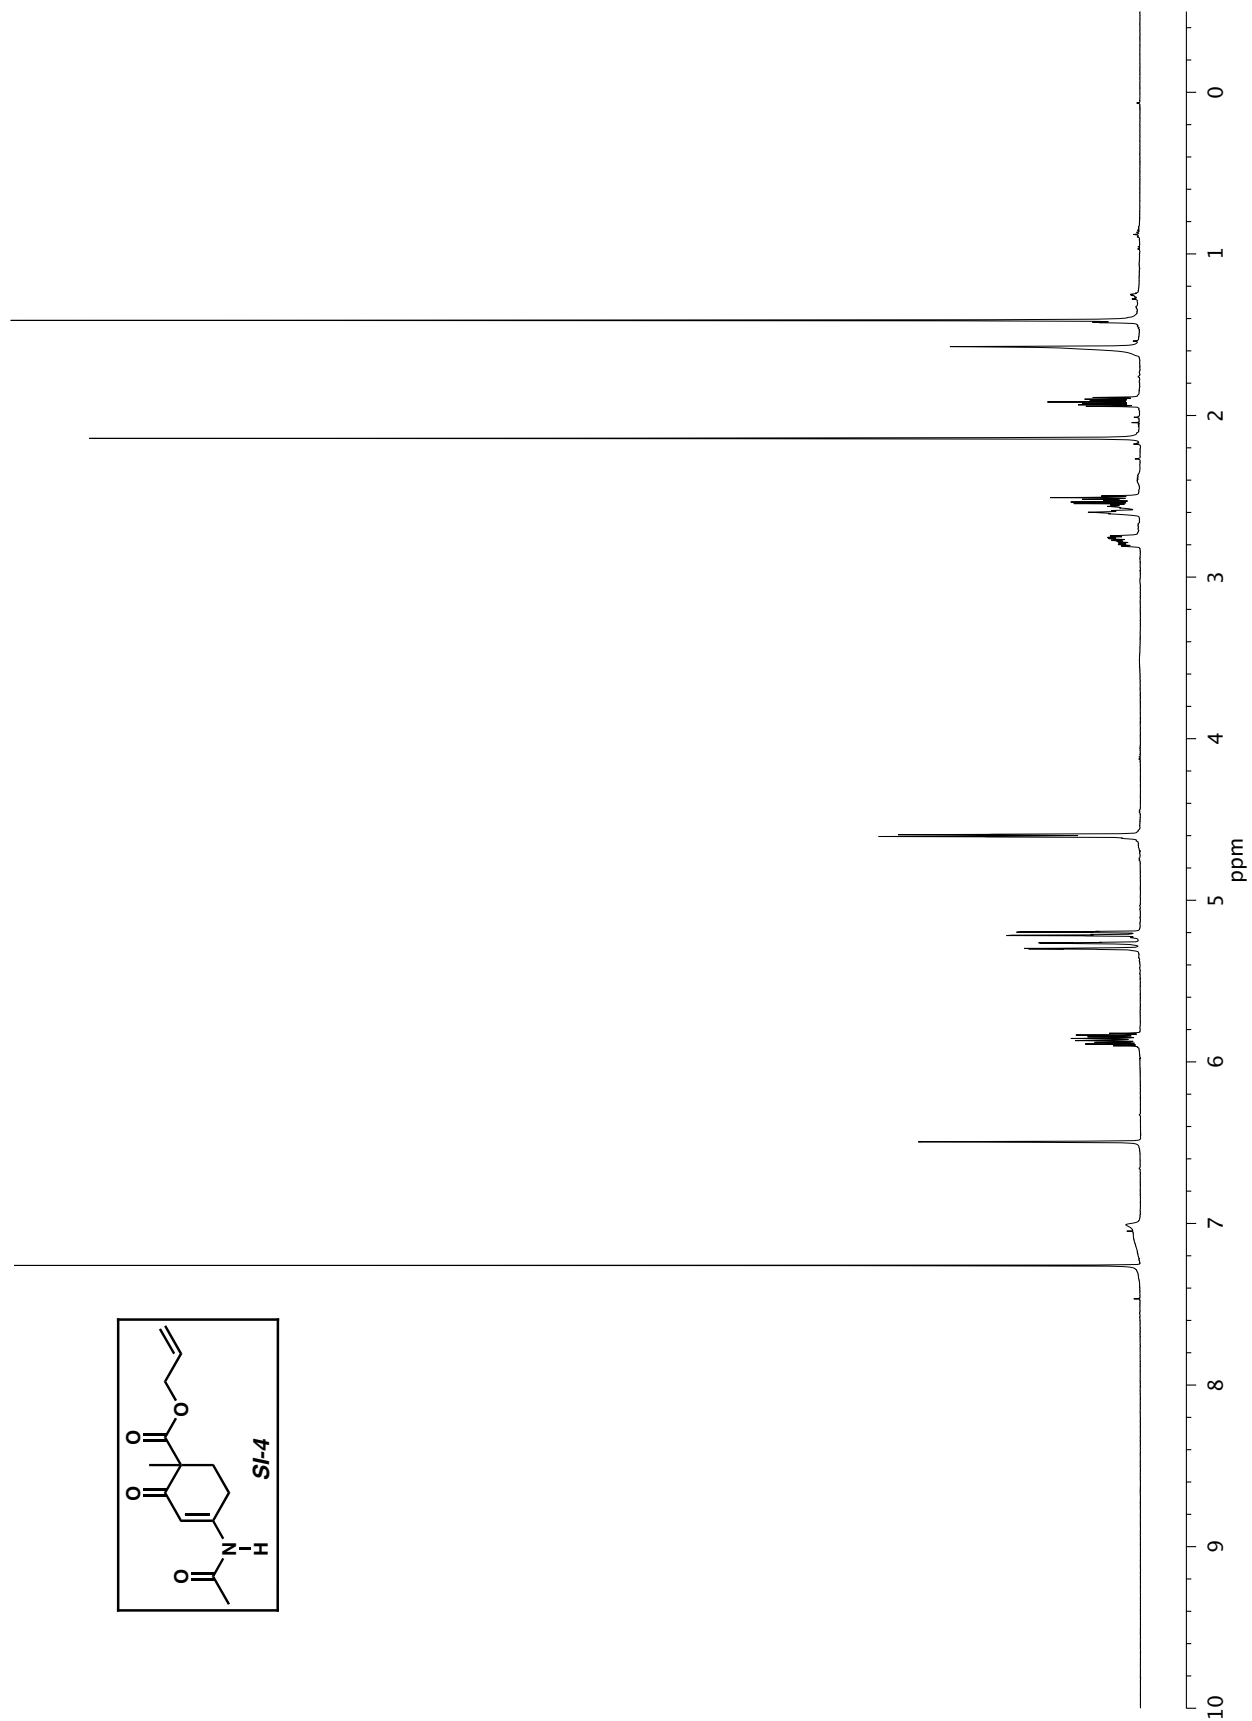

Figure SI-5A.  $^1\text{H}$  NMR (500 MHz,  $\text{CDCl}_3$ ) of compound **SI-4**.

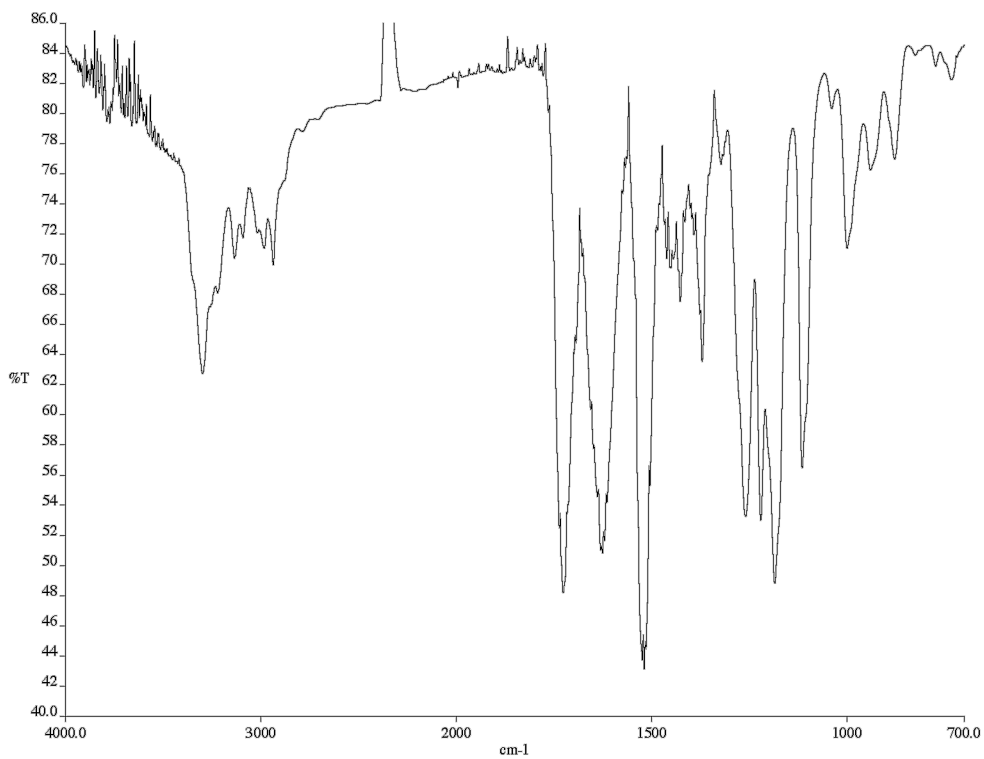

Figure SI-5B. Infrared spectrum (thin film/NaCl) of compound **SI-4**.

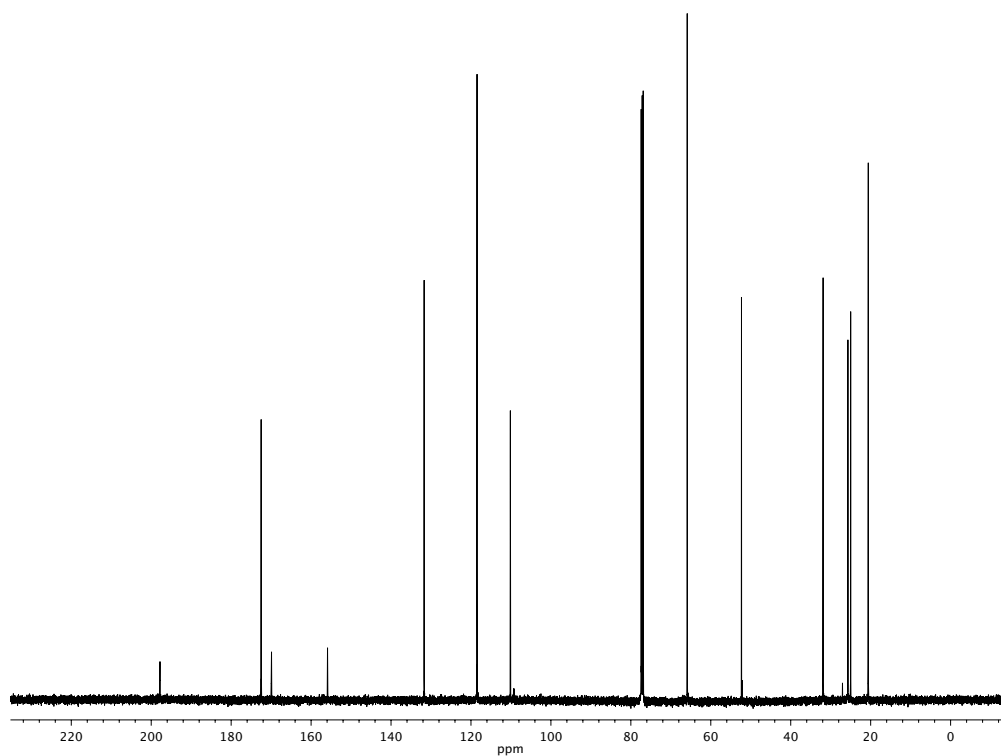

Figure SI-5C. <sup>13</sup>C NMR (125 MHz, CDCl<sub>3</sub>) of compound **SI-4**.

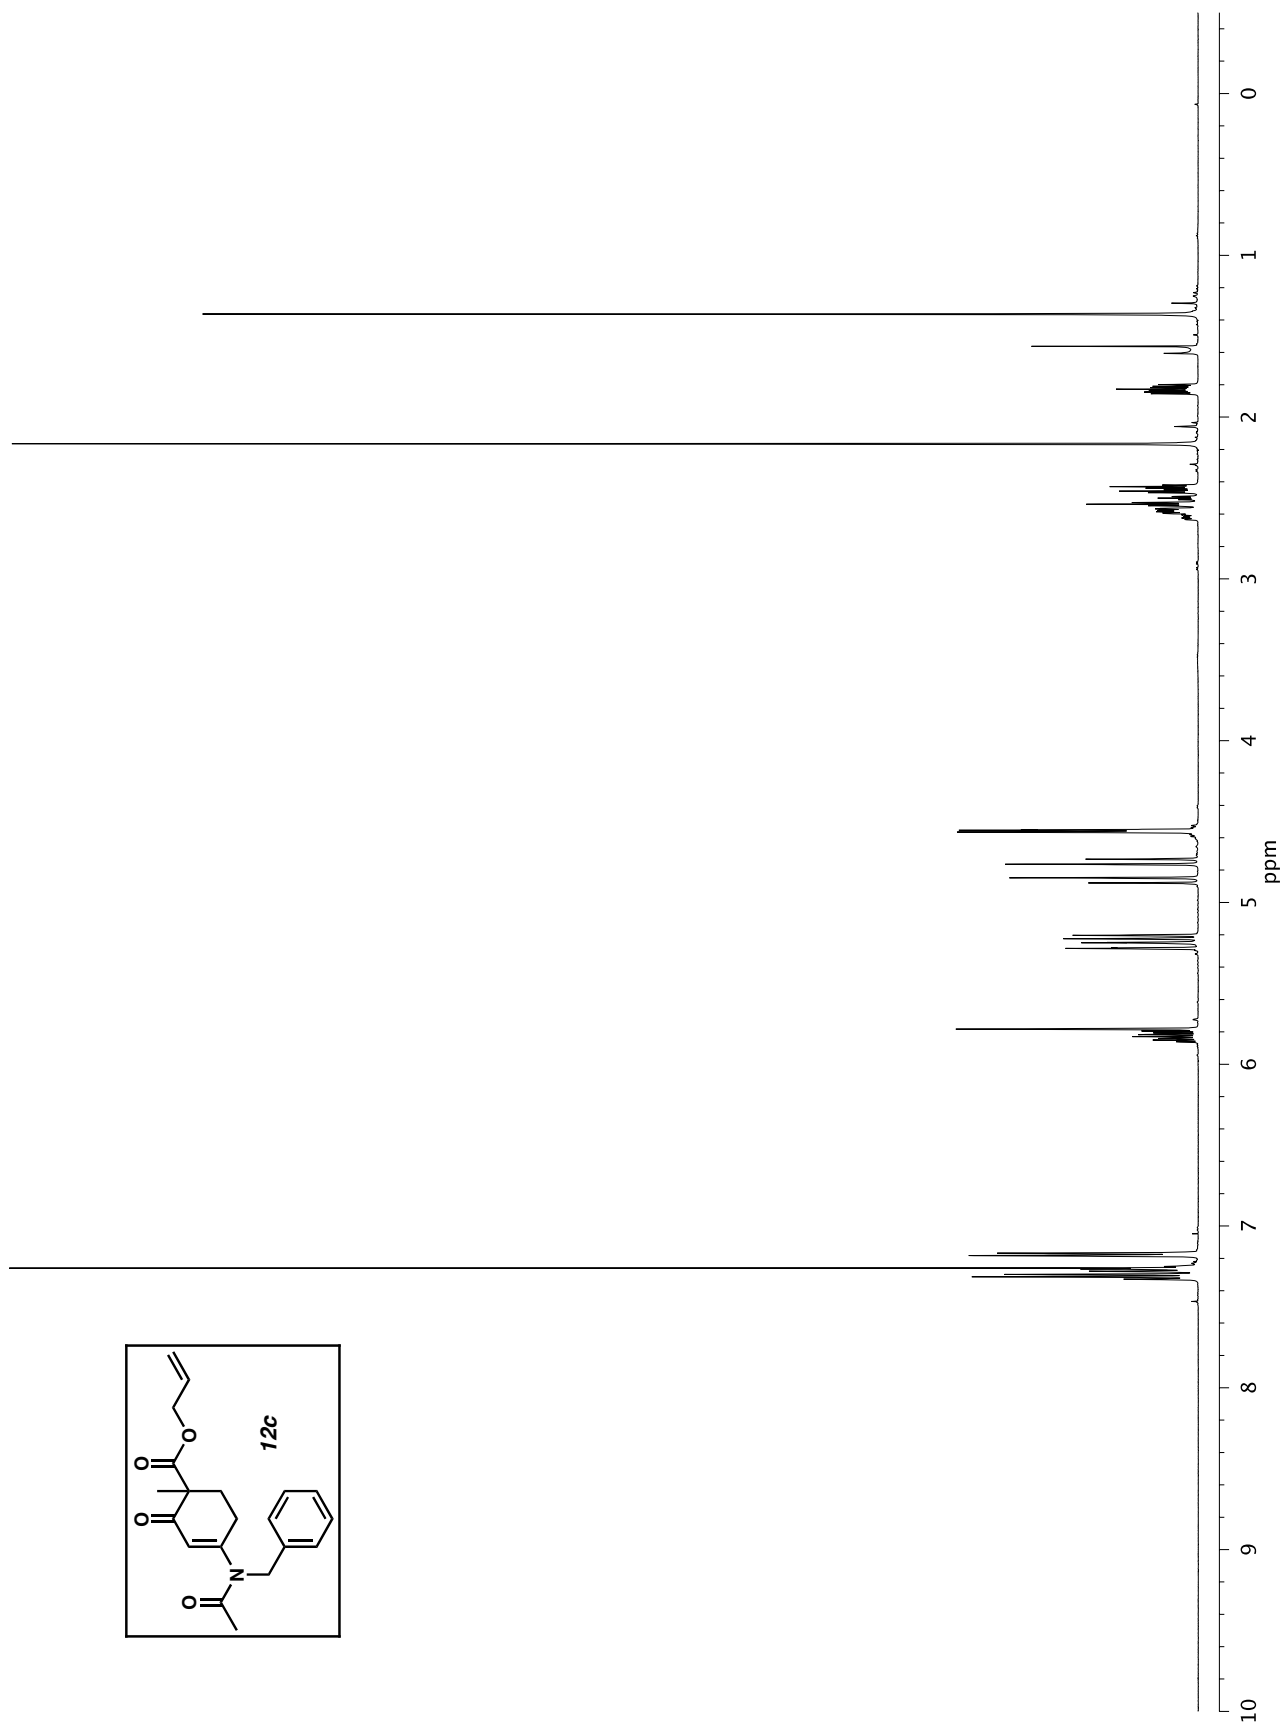

Figure SI-6A.  $^1\text{H}$  NMR (500 MHz,  $\text{CDCl}_3$ ) of compound **12c**.



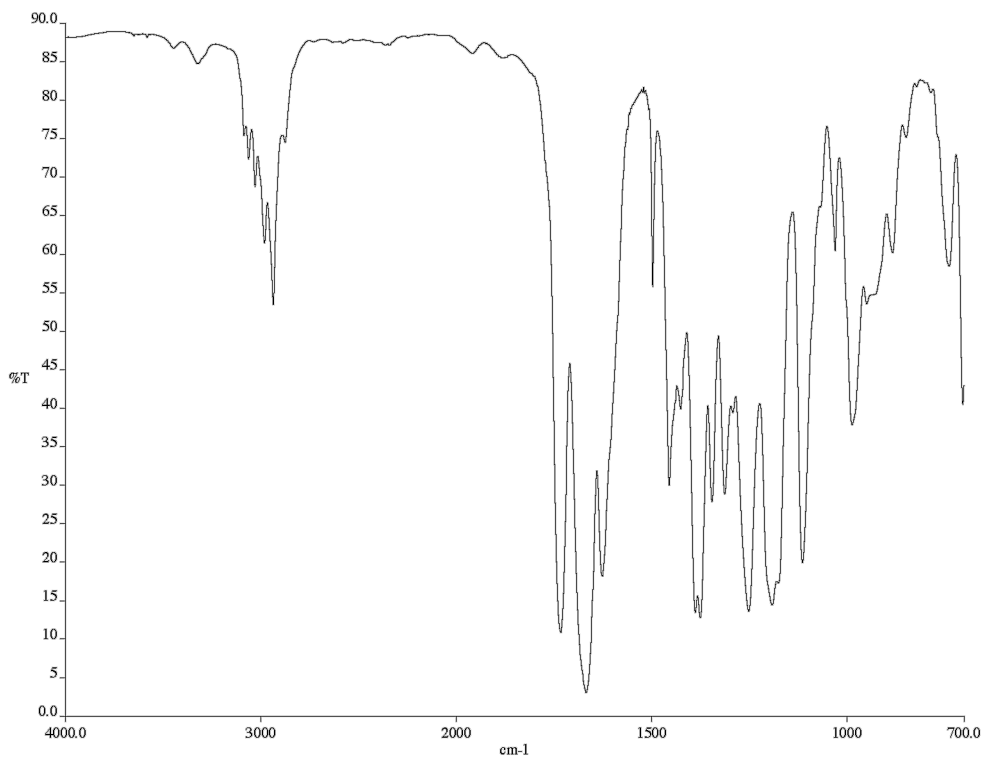

Figure SI-6B. Infrared spectrum (thin film/NaCl) of compound **12c**.

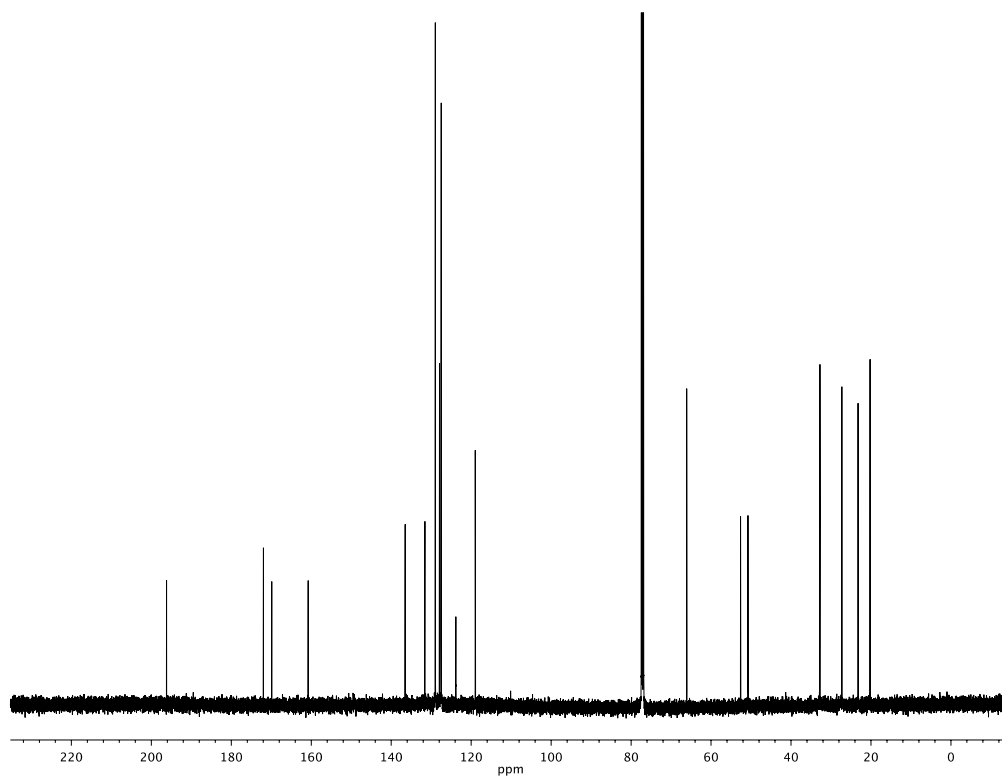

Figure SI-6C.  $^{13}\text{C}$  NMR (125 MHz,  $\text{CDCl}_3$ ) of compound **12c**.

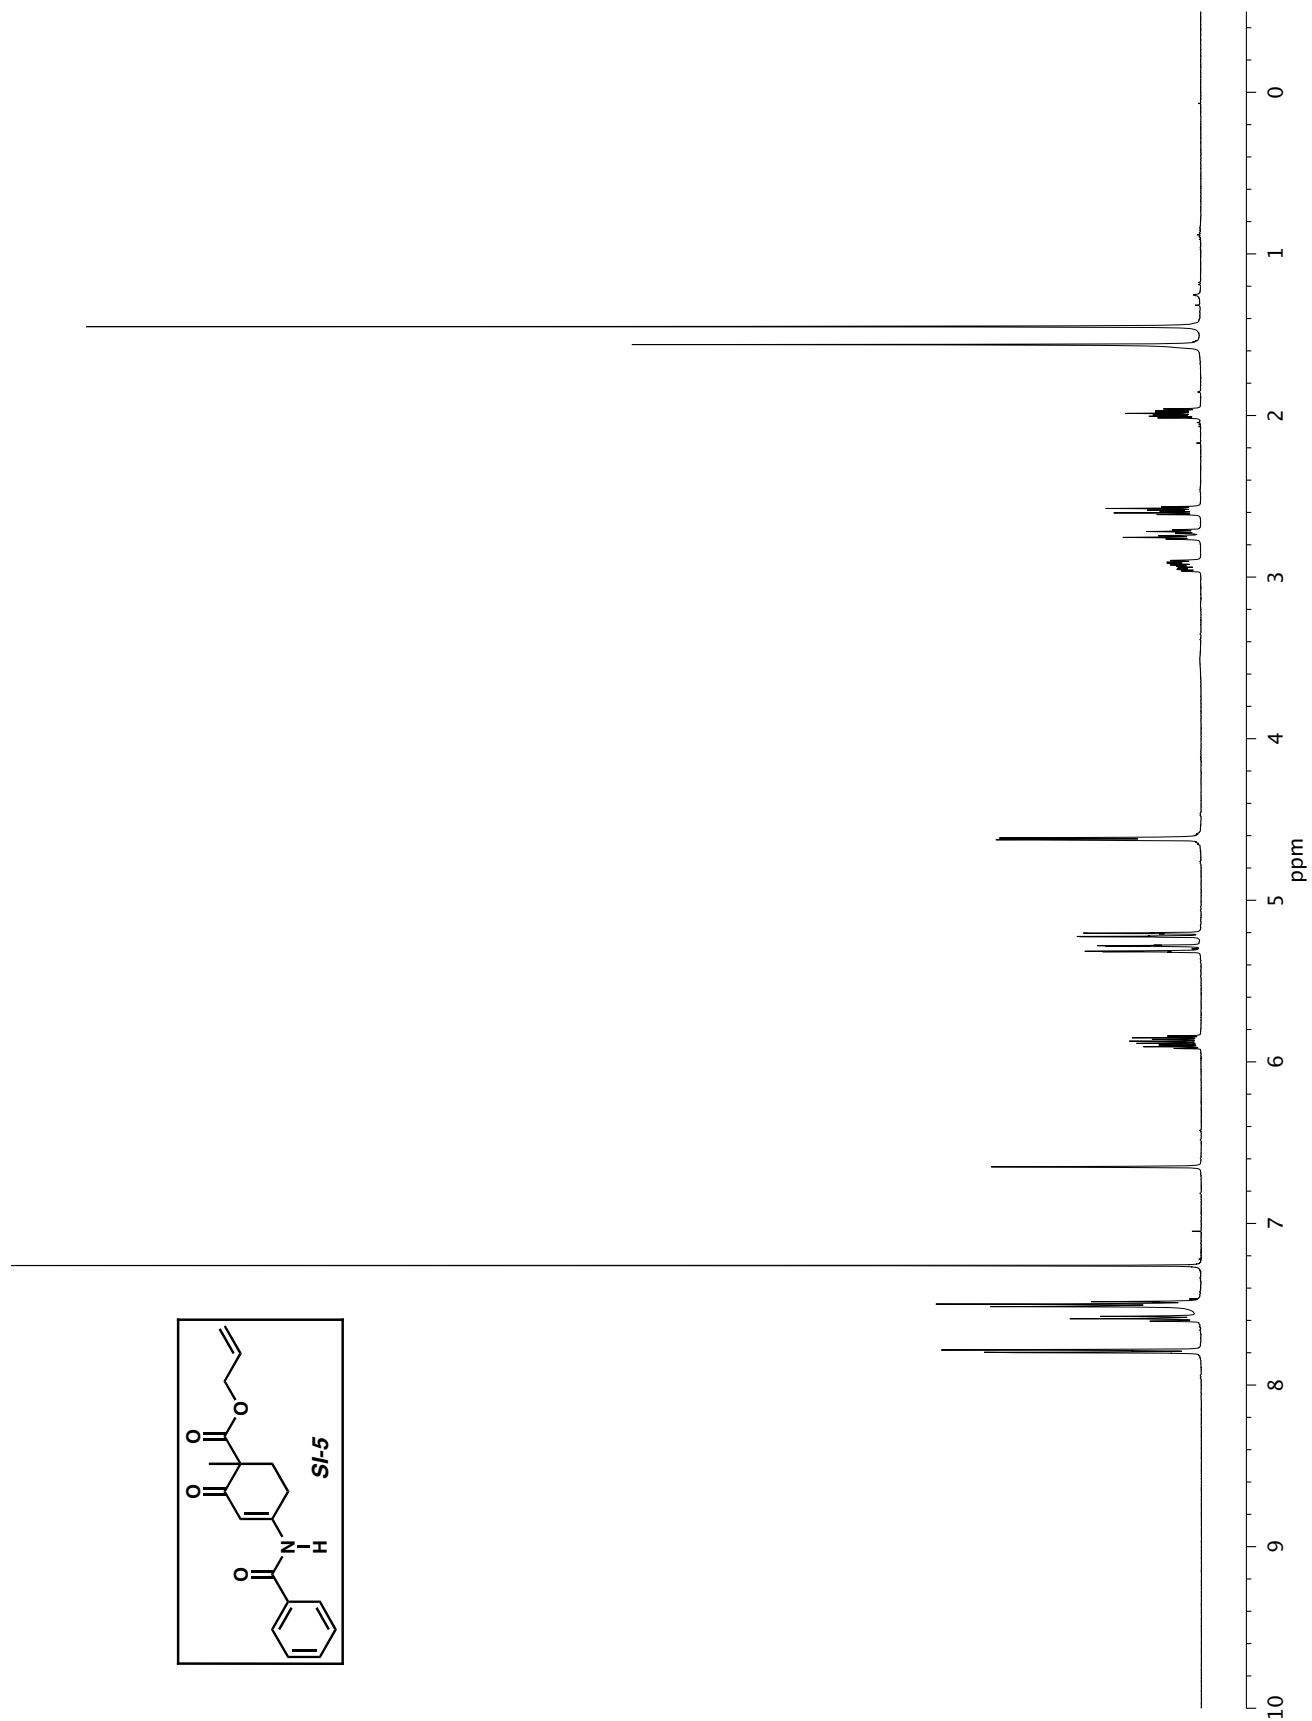

Figure SI-7A. <sup>1</sup>H NMR (500 MHz, CDCl<sub>3</sub>) of compound SI-5.

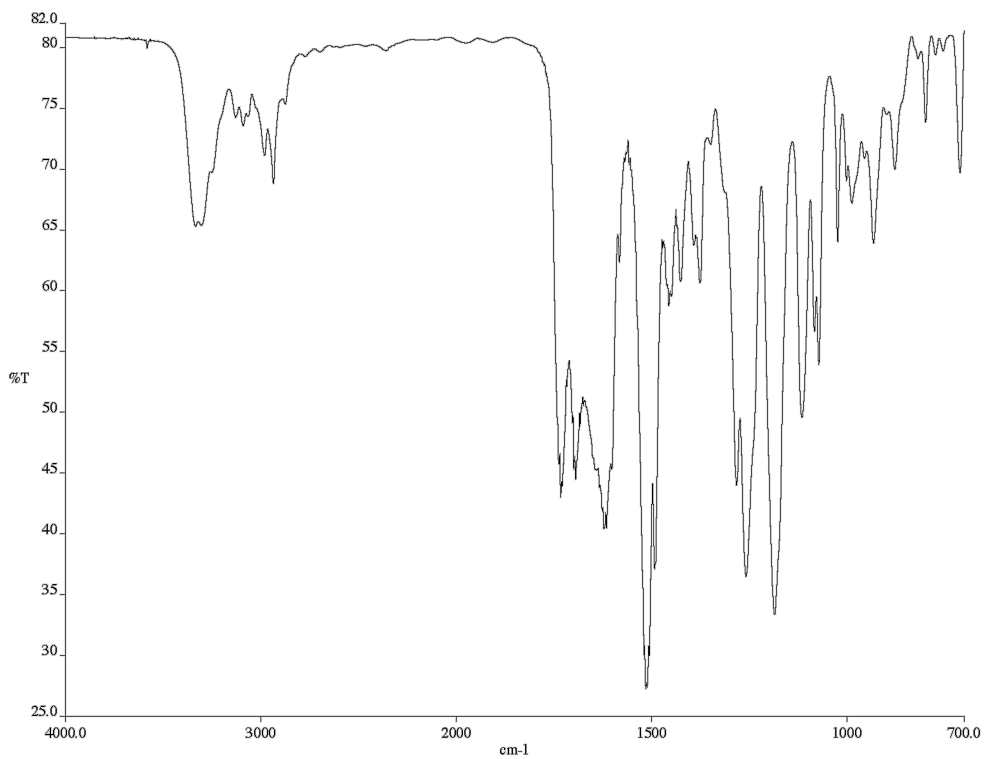

Figure SI-7B. Infrared spectrum (thin film/NaCl) of compound **SI-5**.

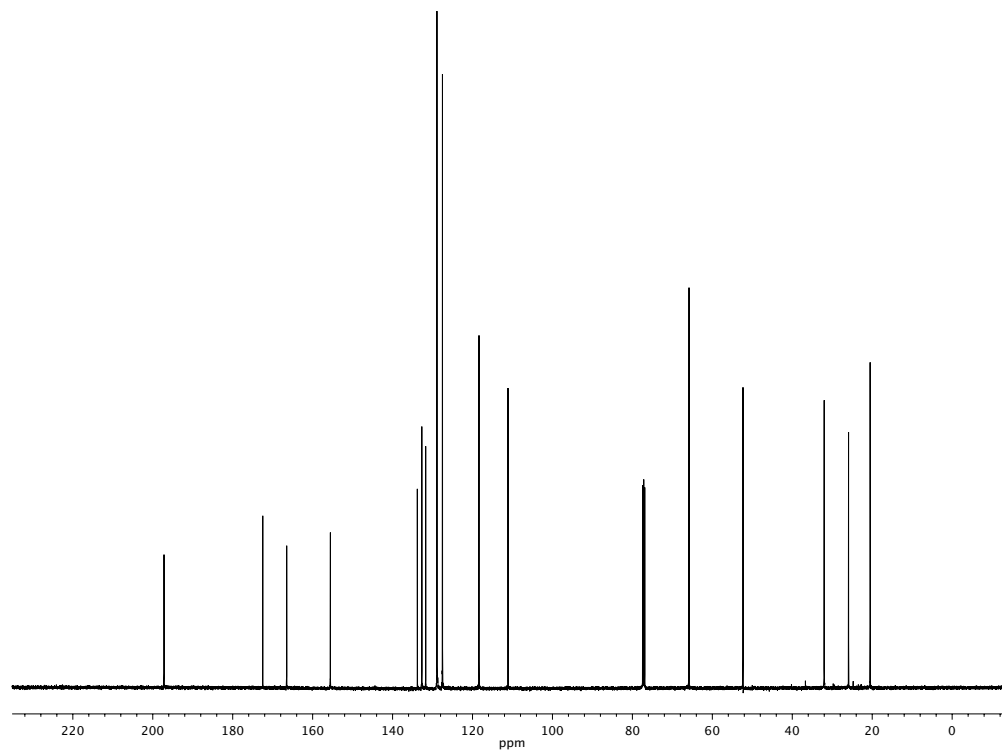

Figure SI-7C. <sup>13</sup>C NMR (125 MHz, CDCl<sub>3</sub>) of compound **SI-5**.

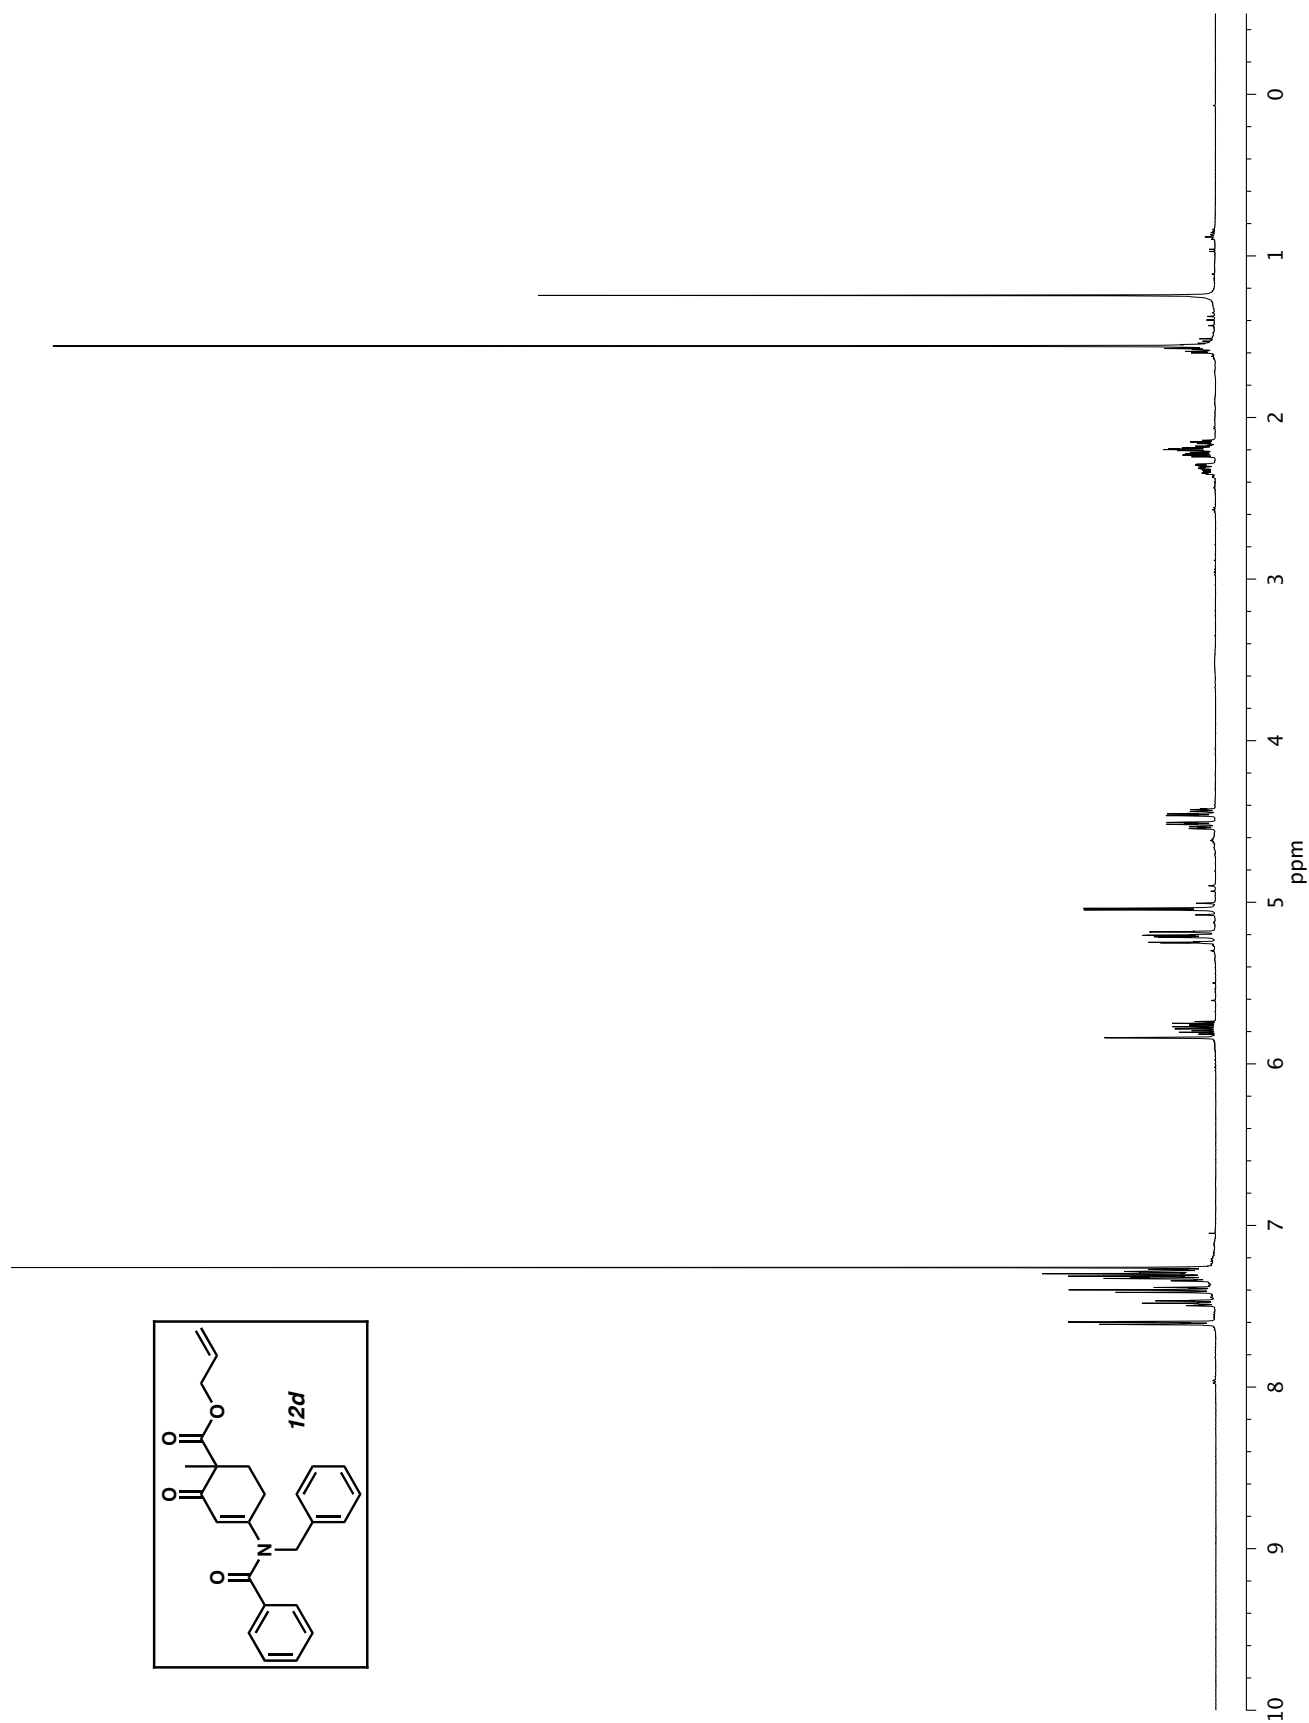

Figure SI-8A.  $^1\text{H}$  NMR (500 MHz,  $\text{CDCl}_3$ ) of compound **12d**.

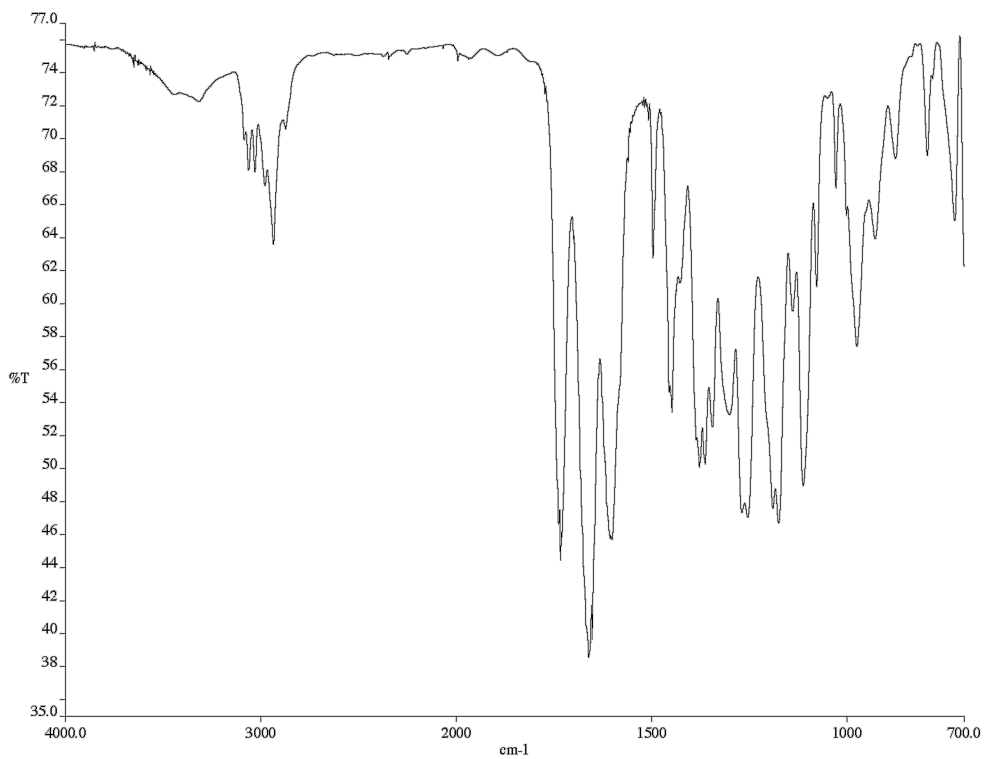

Figure SI-8B. Infrared spectrum (thin film/NaCl) of compound **12d**.

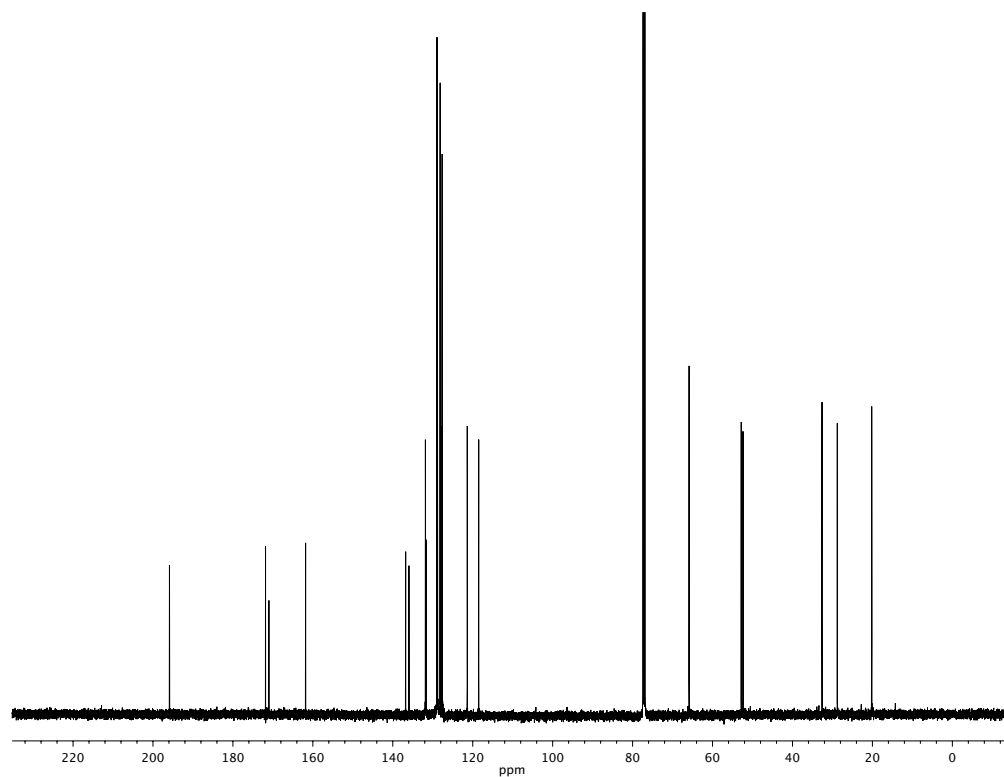

Figure SI-8C. <sup>13</sup>C NMR (125 MHz, CDCl<sub>3</sub>) of compound **12d**.

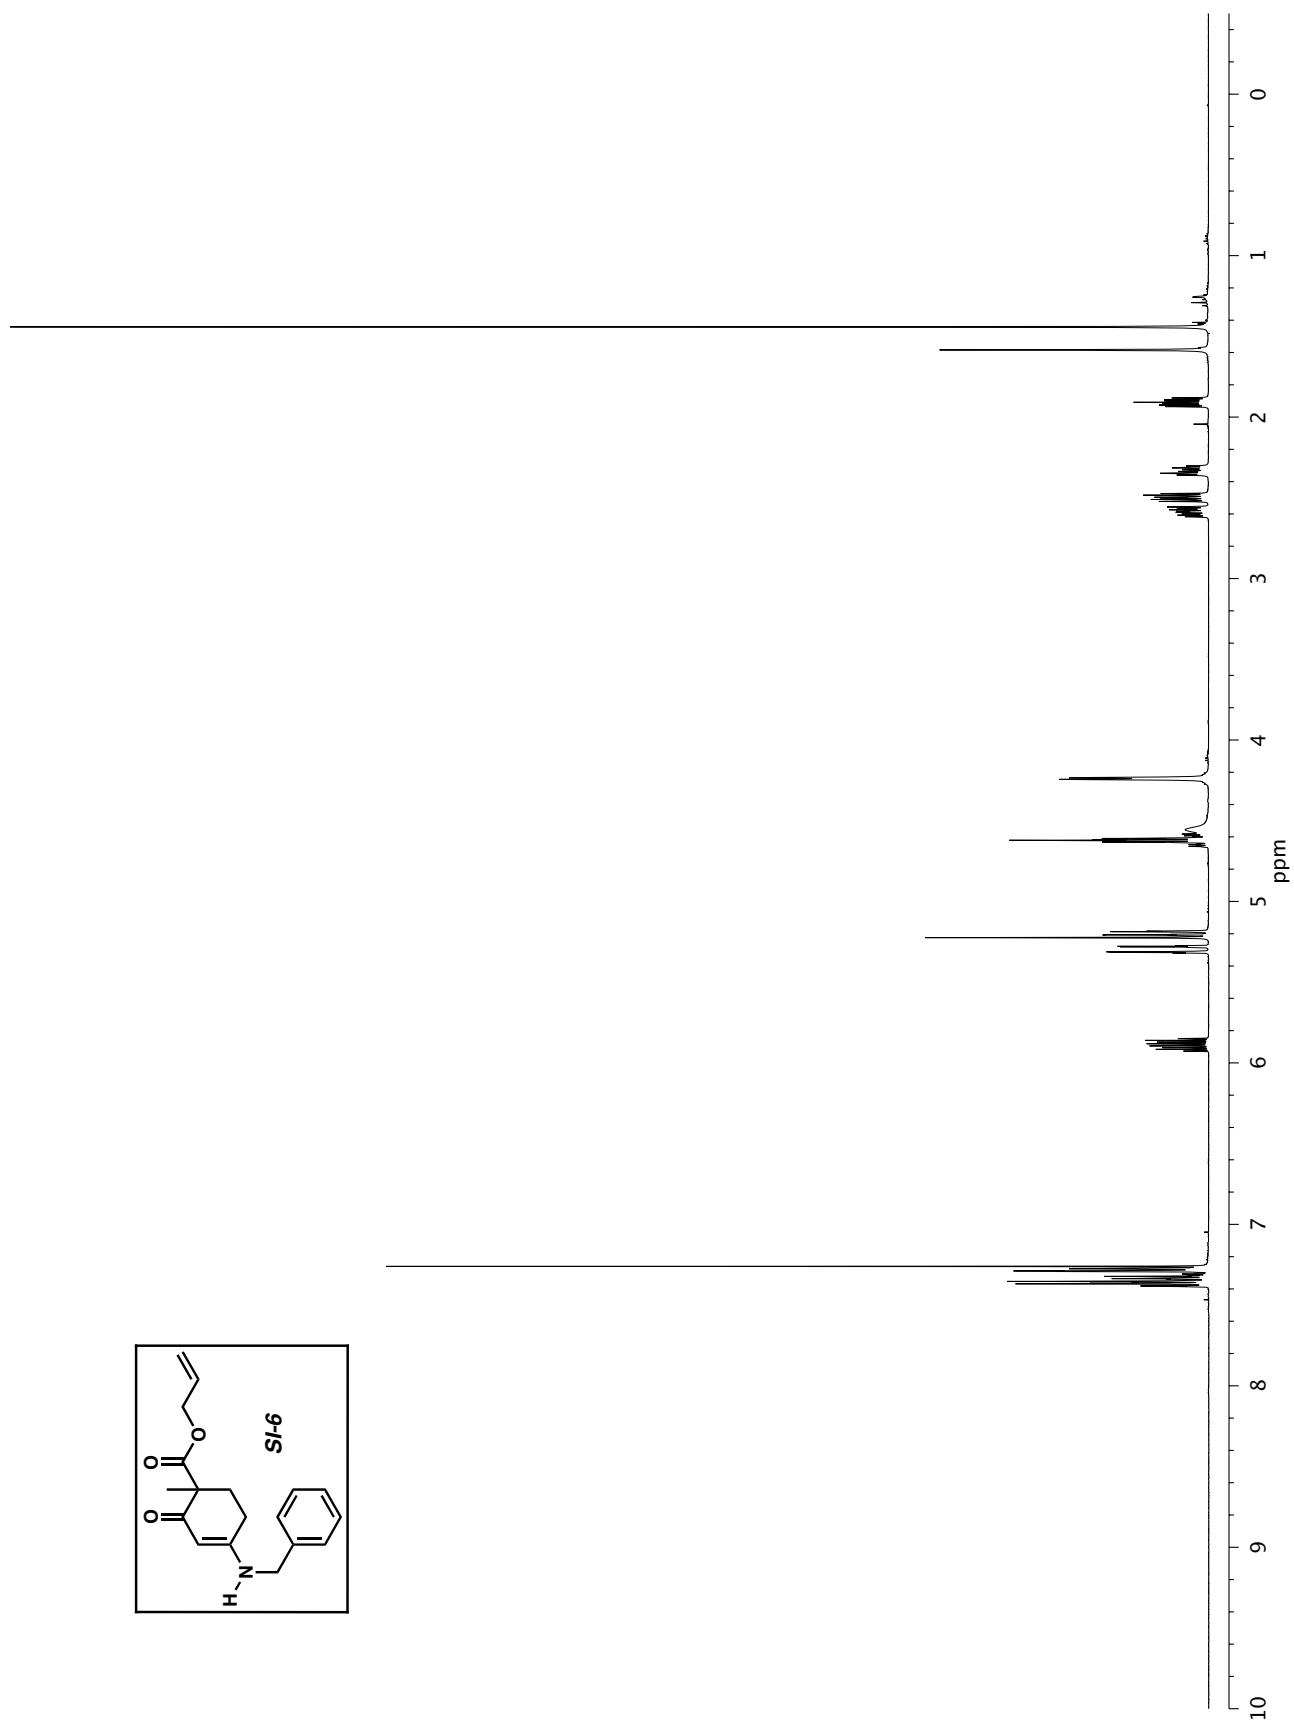

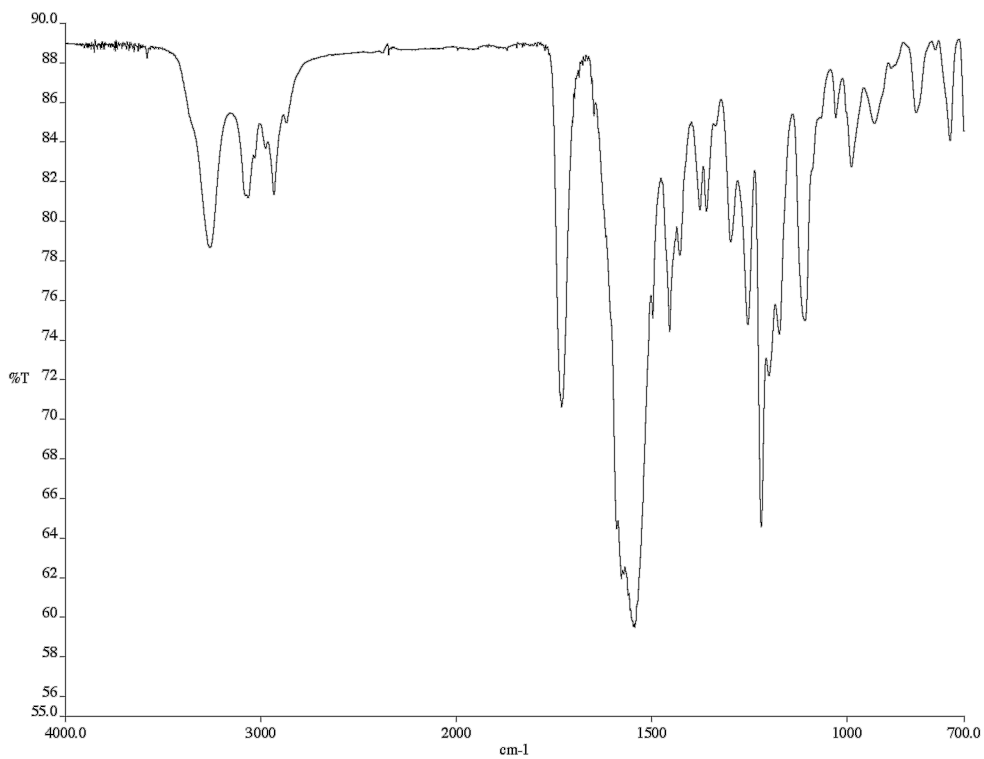

Figure SI-9B. Infrared spectrum (thin film/NaCl) of compound **SI-6**.

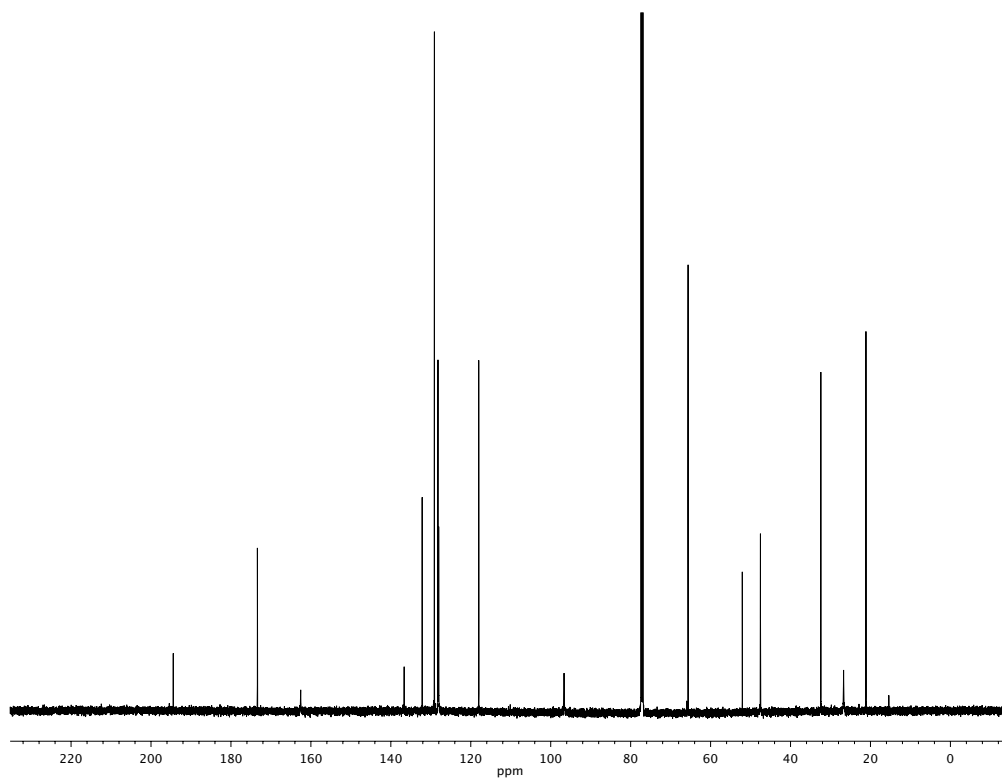

Figure SI-9C.  $^{13}\text{C}$  NMR (125 MHz,  $\text{CDCl}_3$ ) of compound **SI-6**.

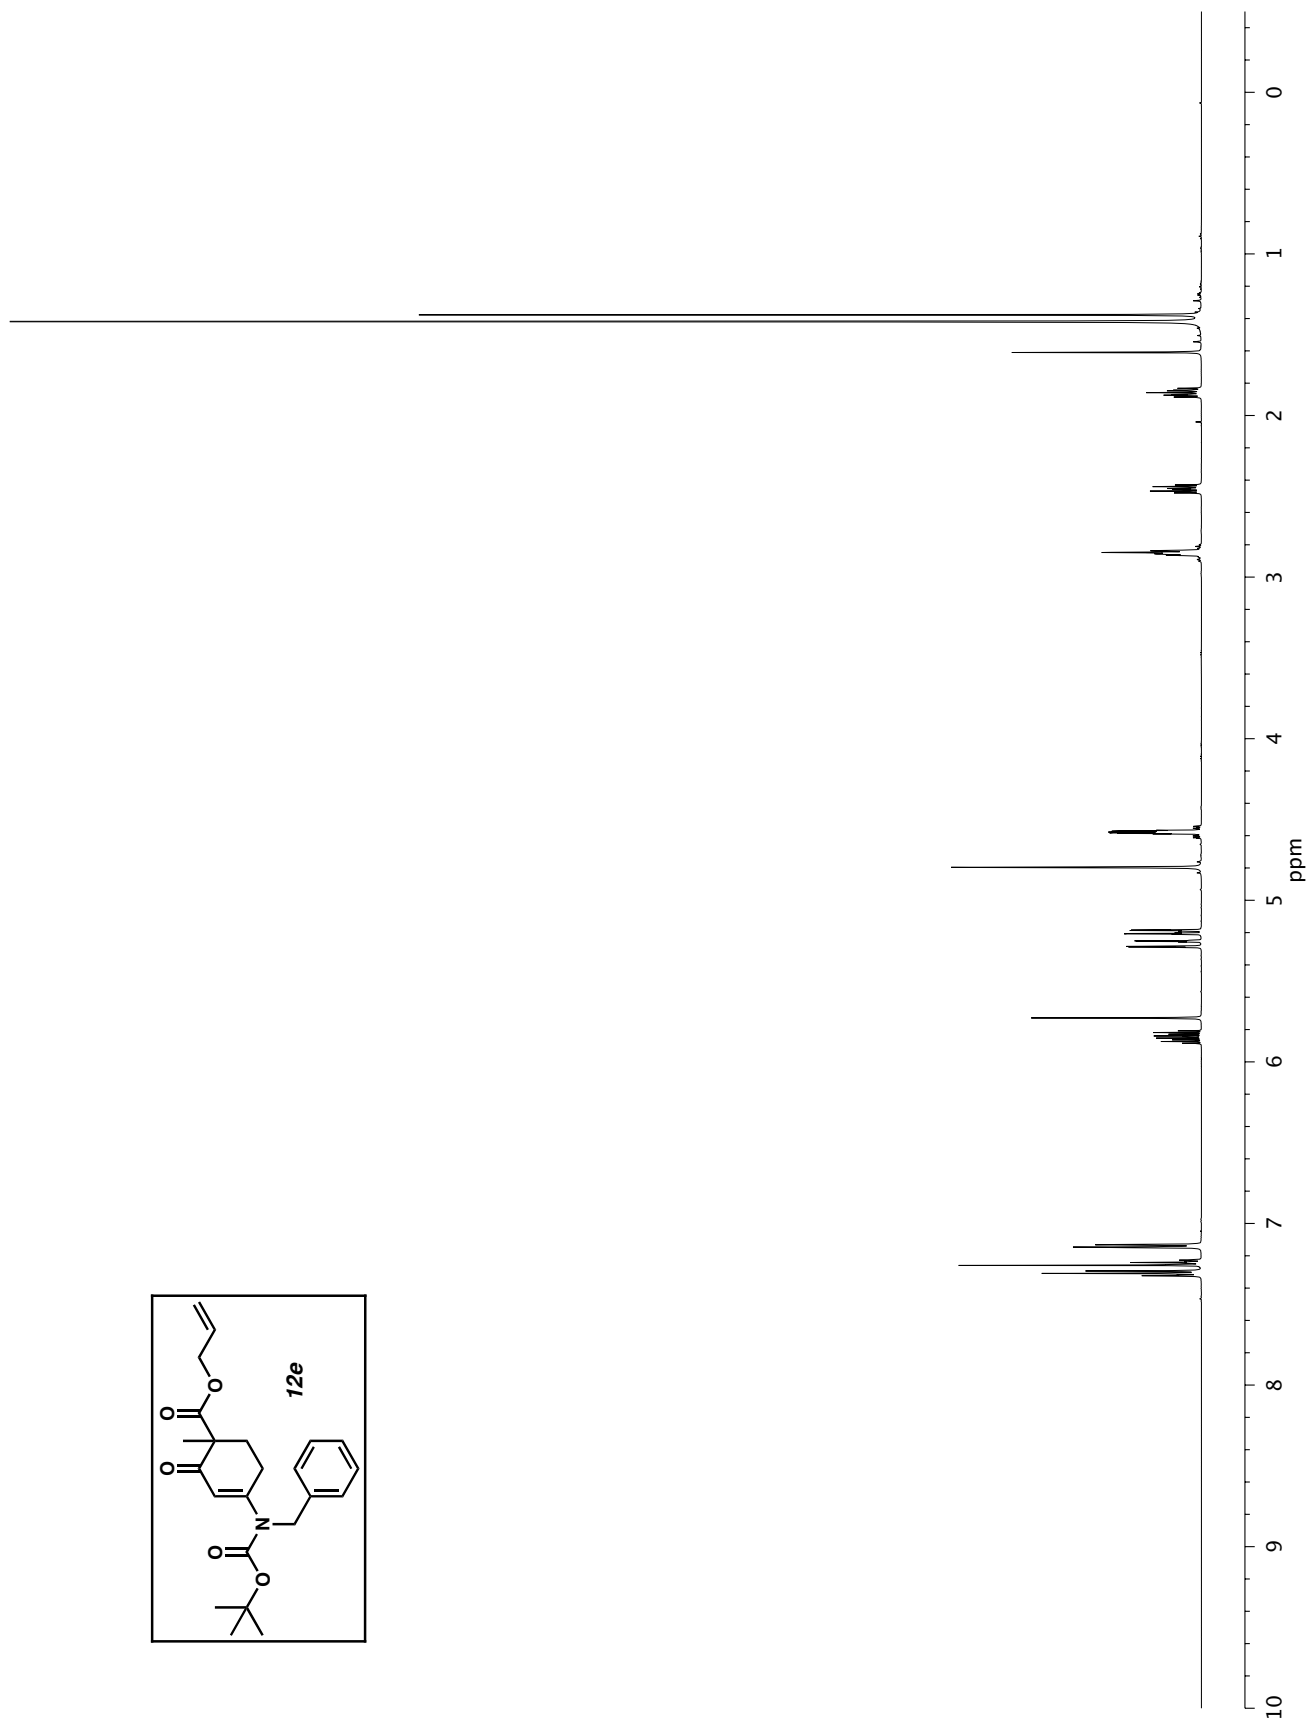

Figure SI-10A.  $^1\text{H}$  NMR (500 MHz,  $\text{CDCl}_3$ ) of compound **12e**.



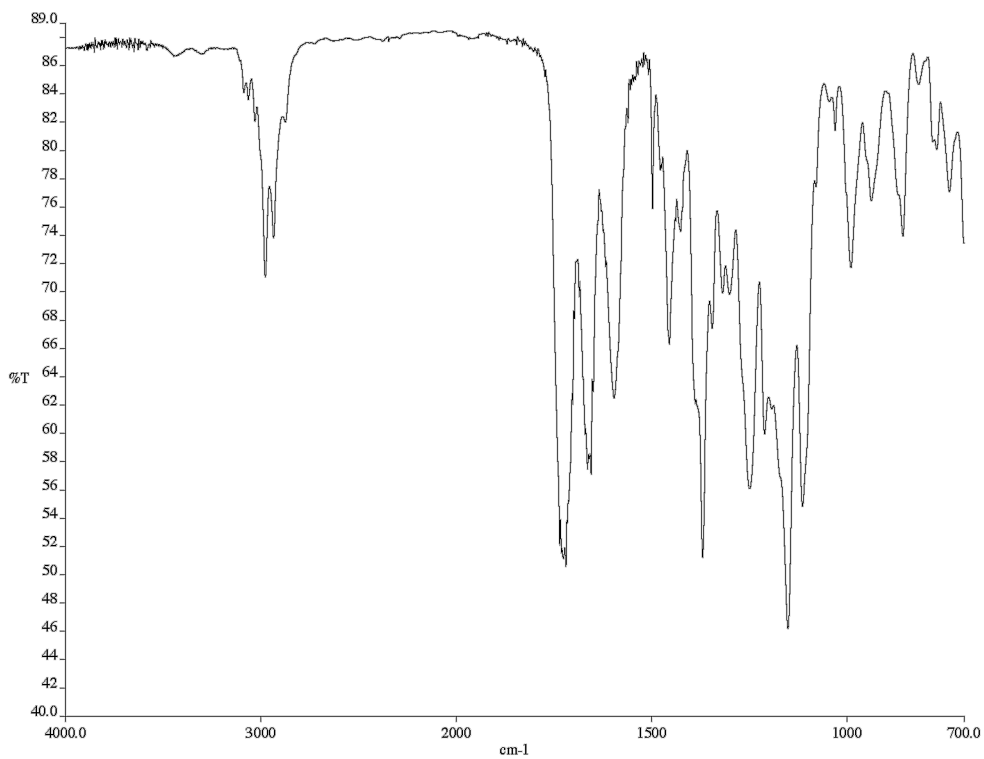

Figure SI-10B. Infrared spectrum (thin film/NaCl) of compound **12e**.

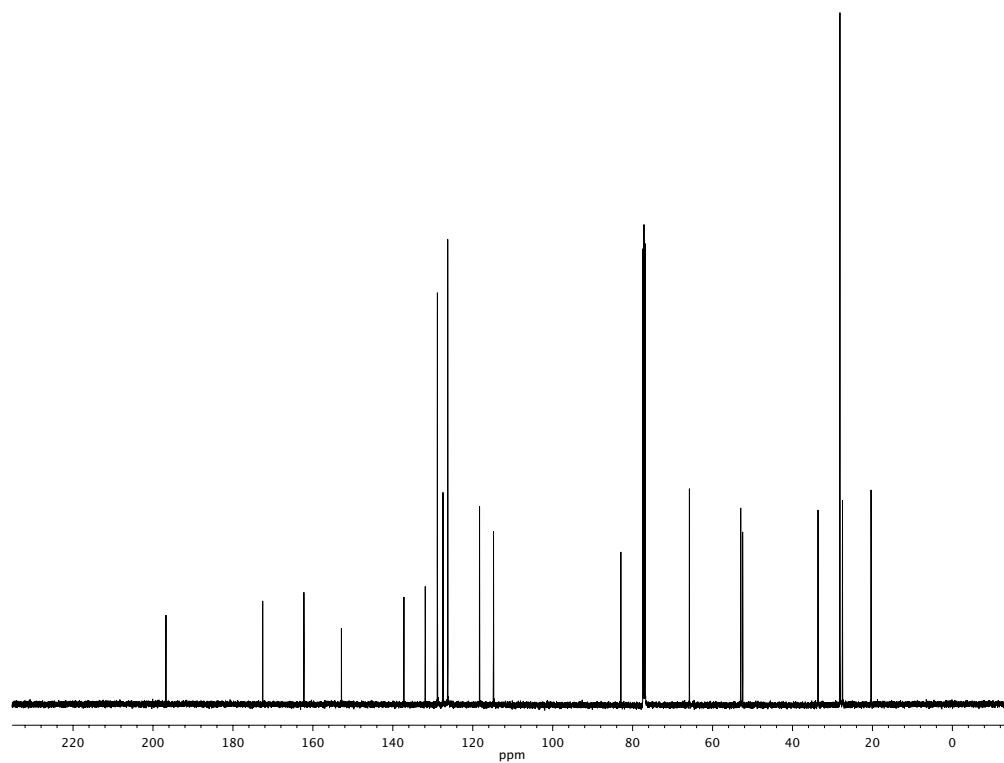

Figure SI-10C. <sup>13</sup>C NMR (125 MHz, CDCl<sub>3</sub>) of compound **12e**.

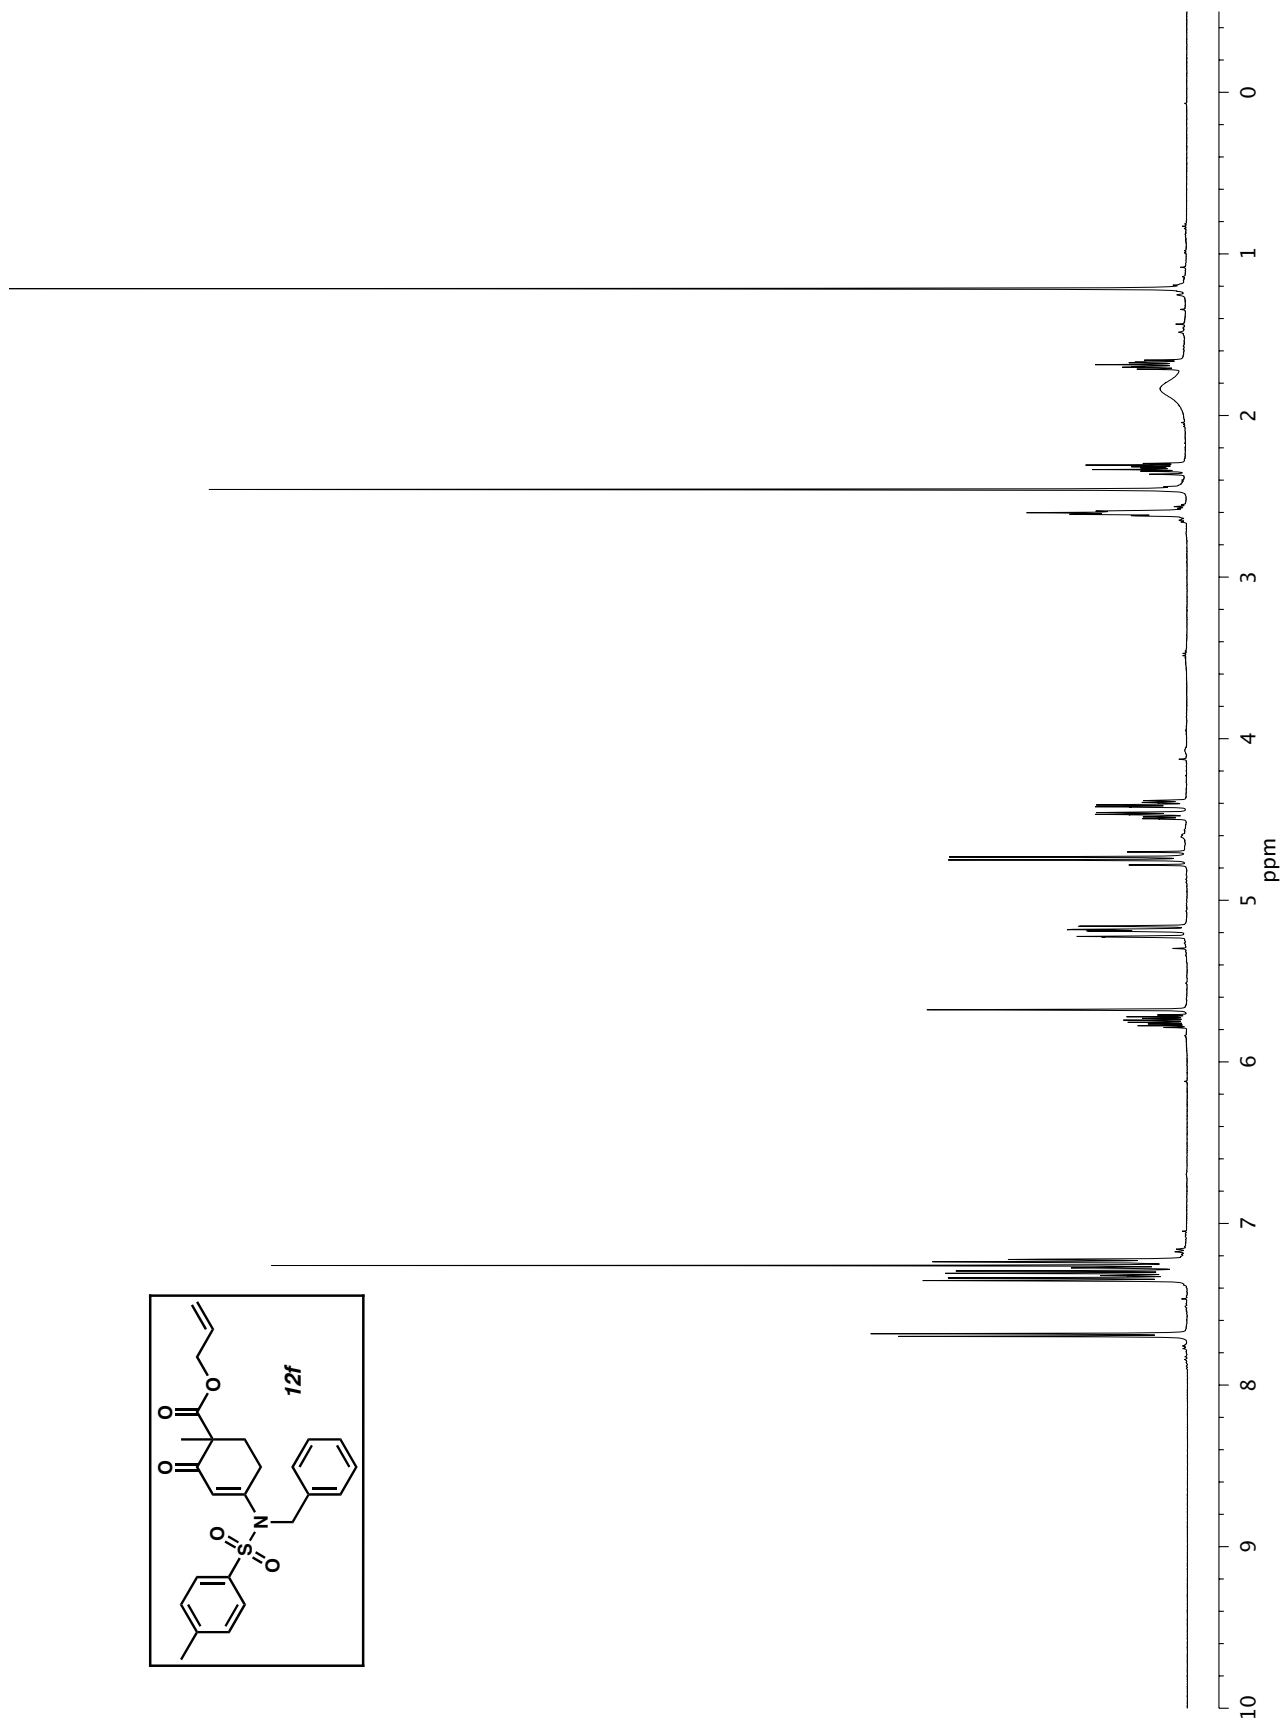Figure SI-11A.  $^1\text{H}$  NMR (500 MHz,  $\text{CDCl}_3$ ) of compound **12f**.

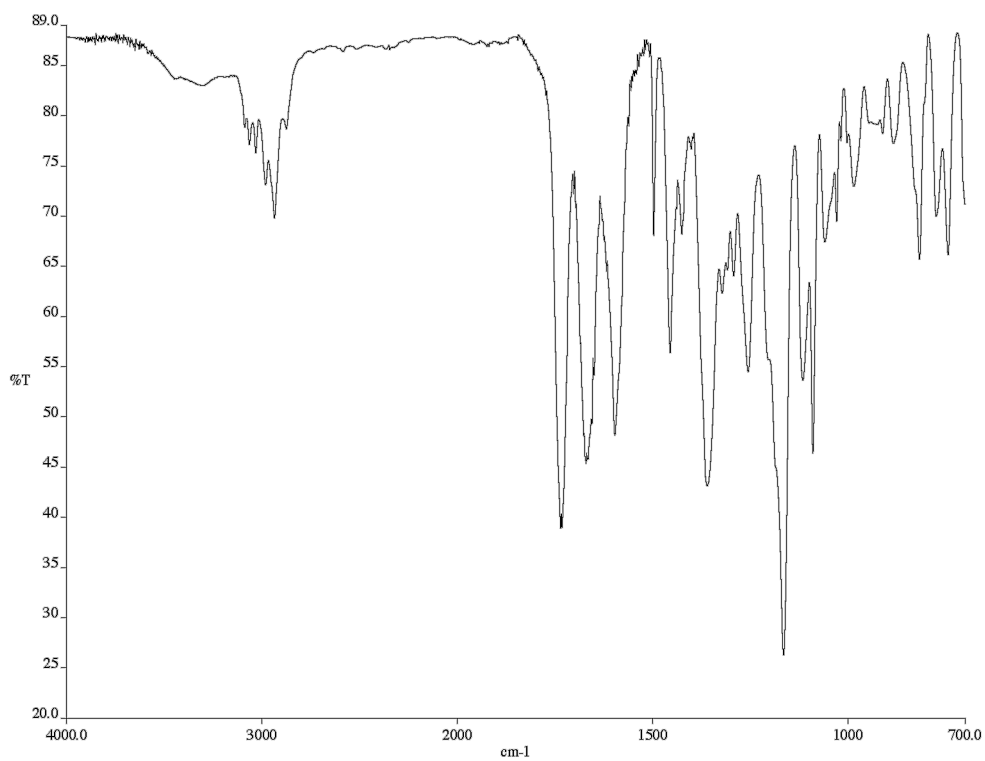

Figure SI-11B. Infrared spectrum (thin film/NaCl) of compound **12f**.

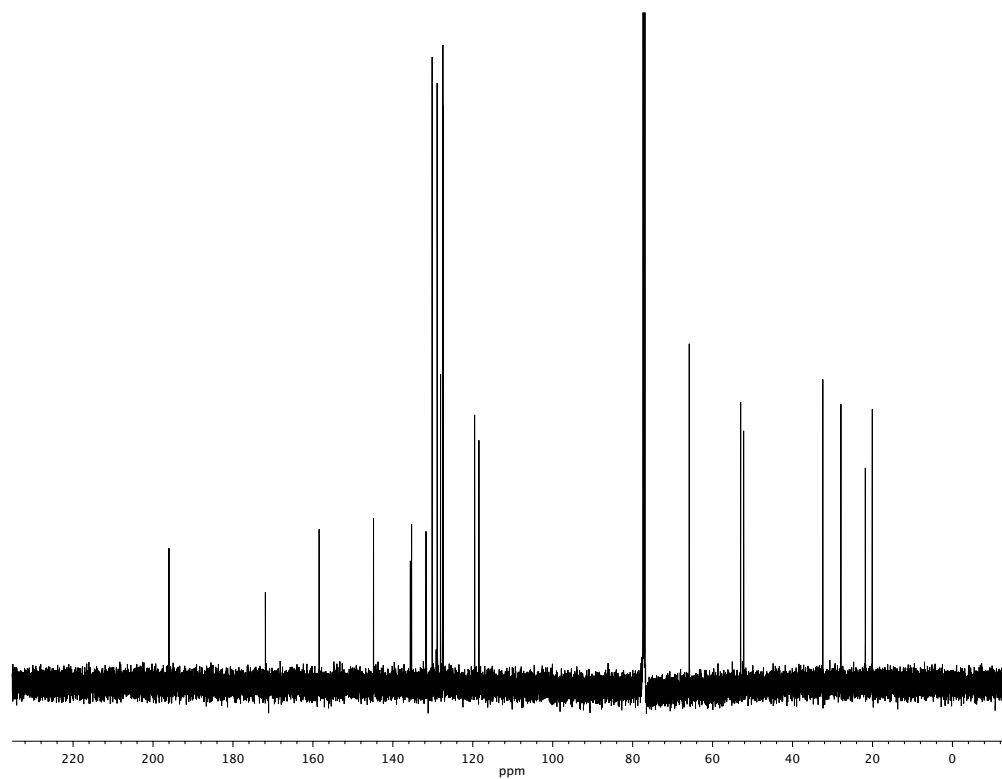

Figure SI-11C. <sup>13</sup>C NMR (125 MHz, CDCl<sub>3</sub>) of compound **12f**.

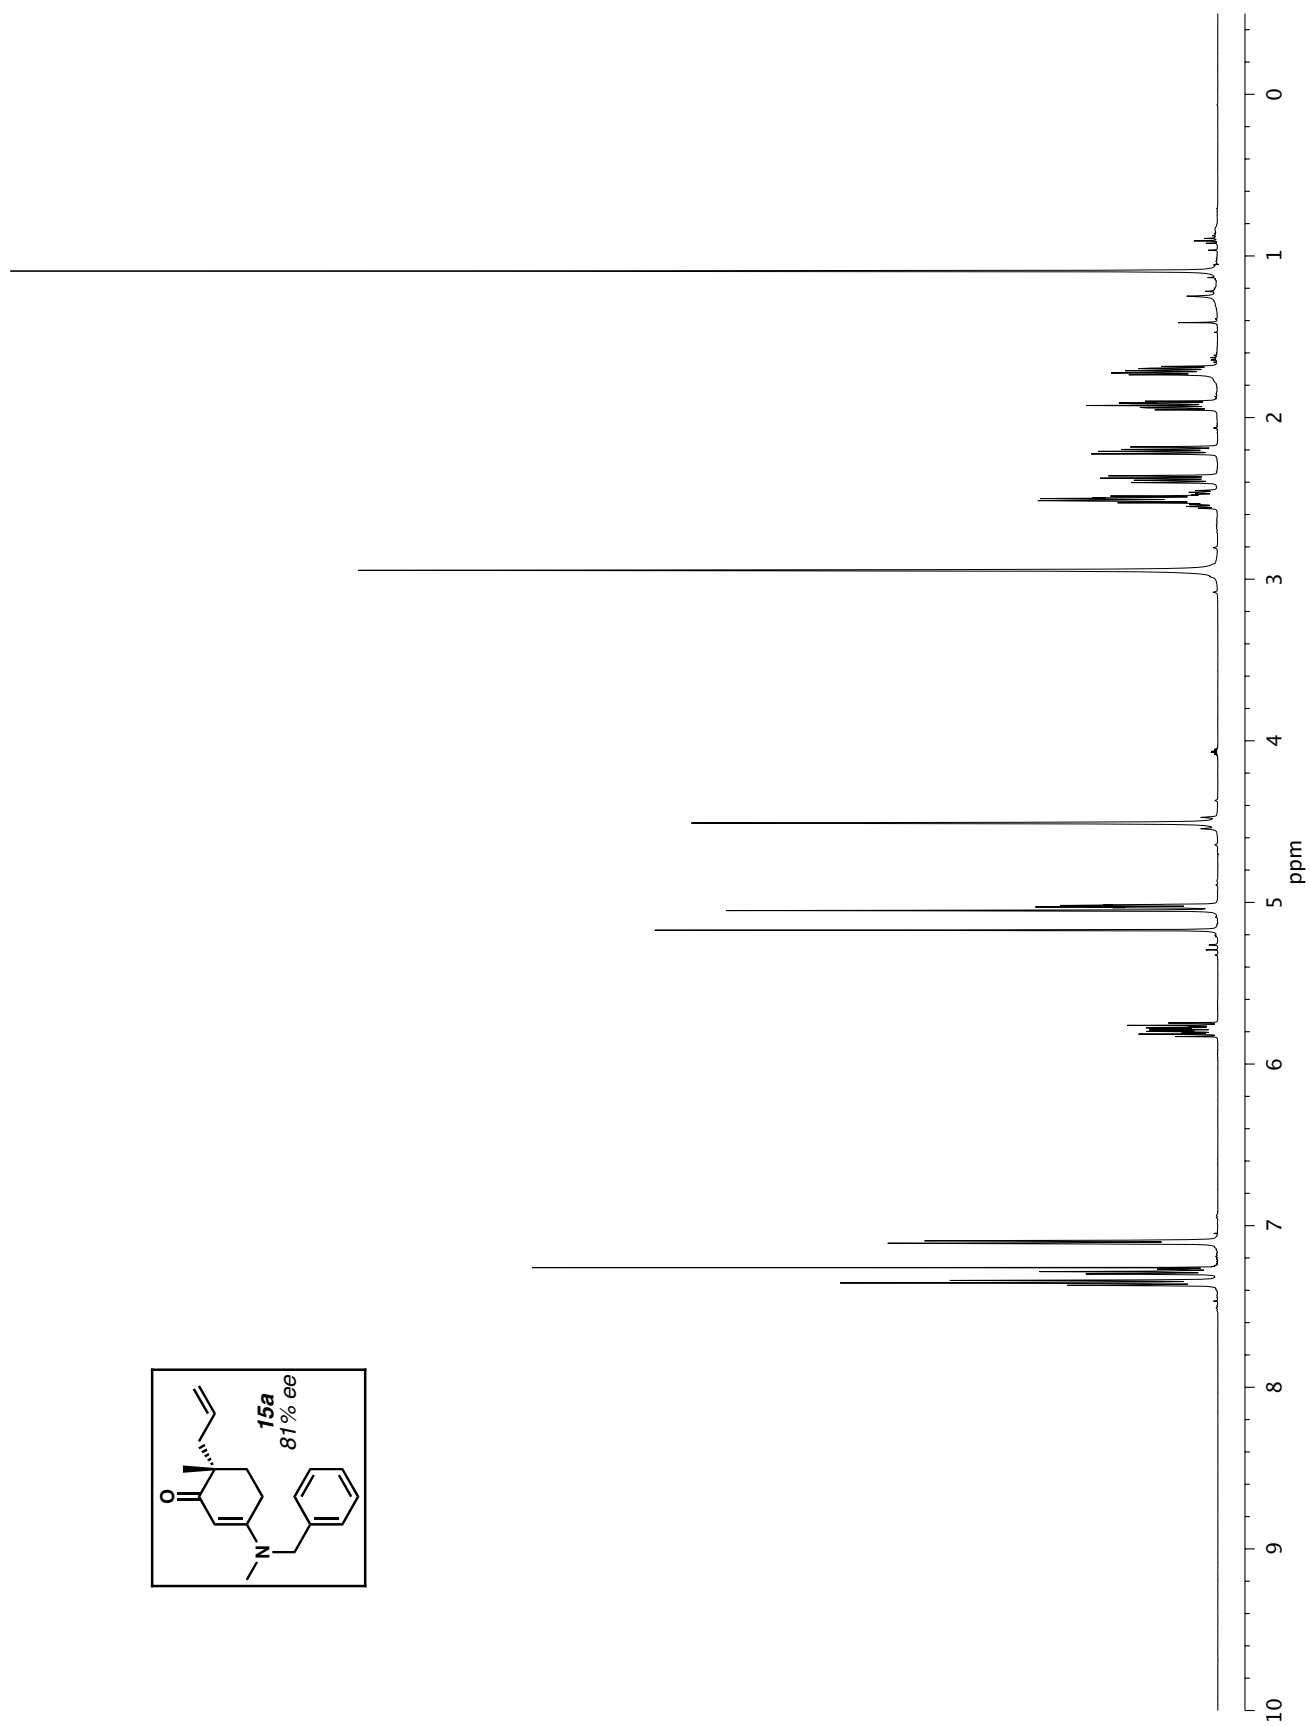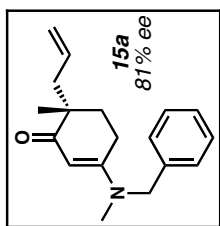

Figure SI-12A.  $^1\text{H}$  NMR (500 MHz,  $\text{CDCl}_3$ ) of compound **15a**.

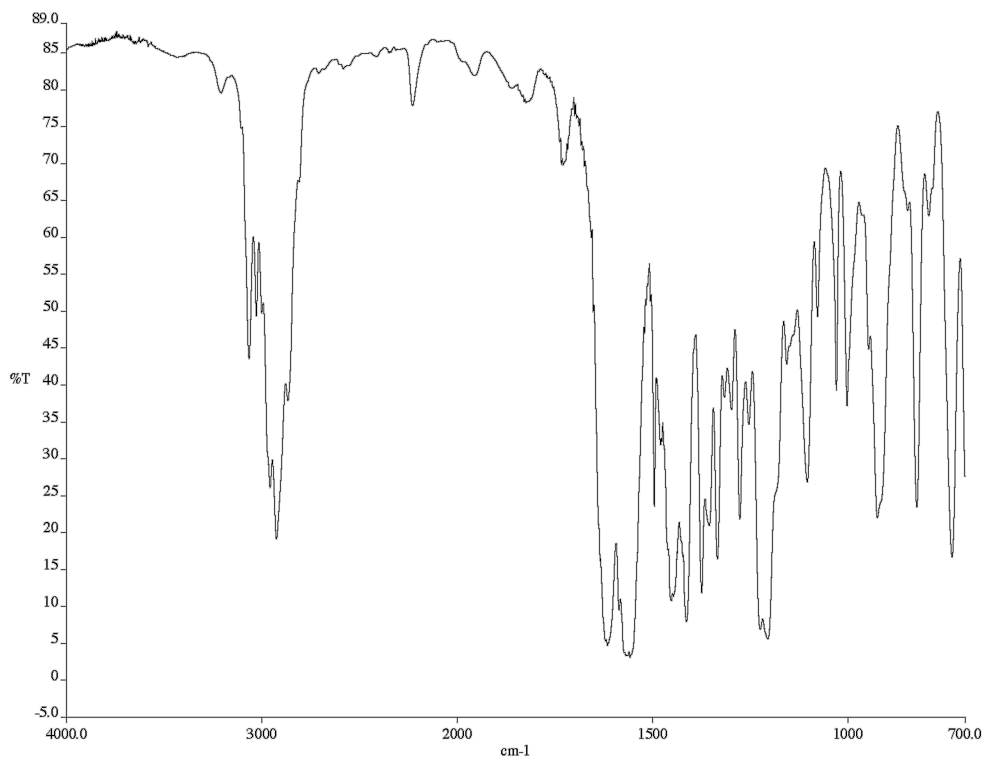

Figure SI-12B. Infrared spectrum (thin film/NaCl) of compound **15a**.

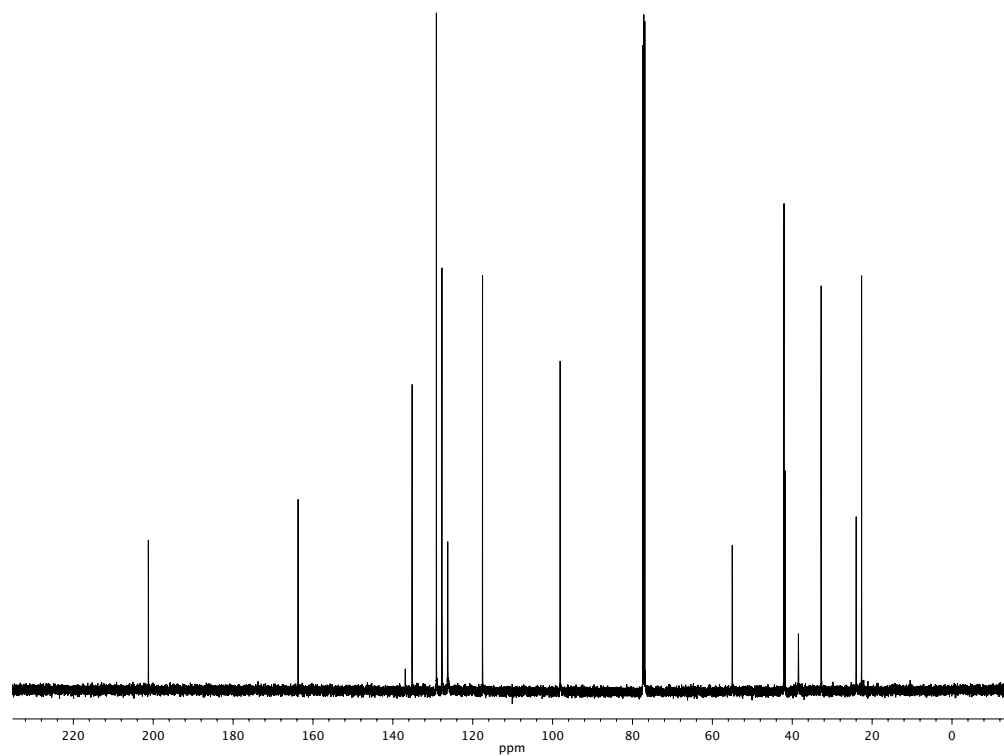

Figure SI-12C.  $^{13}\text{C}$  NMR (125 MHz,  $\text{CDCl}_3$ ) of compound **15a**.

NBB-VII-271A Col 2 7MeOH-2 NBB-VII-271A 2-4 11/28/2011 2:52:51 PM

## Analytical Report SFC

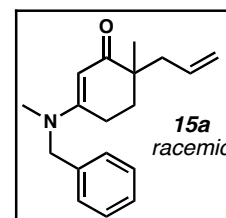

## Chromatogram Information

|                      |                                               |
|----------------------|-----------------------------------------------|
| User Name            | User                                          |
| HPLC System Name     | Jasco SFC w PDA                               |
| Injection Date       | 11/23/2011 9:34:49 PM                         |
| Volume               | 5.00 [μL]                                     |
| Sample #             | 51                                            |
| Project Name         | Cal Tech SFC                                  |
| Executed Sequence    | NBB-VII-271A Col 2 7MeOH-2                    |
| Chromatogram Name    | NBB-VII-271A 2-4                              |
| Sample Name          |                                               |
| Acquisition Time     | 12.0 [min]                                    |
| Acquisition Sequence | NBB-VII-271A Col 2 7MeOH-2                    |
| Control Method       | Solv 1 Col 2 Isocratic 5B 5mL_min 10MPa 15min |

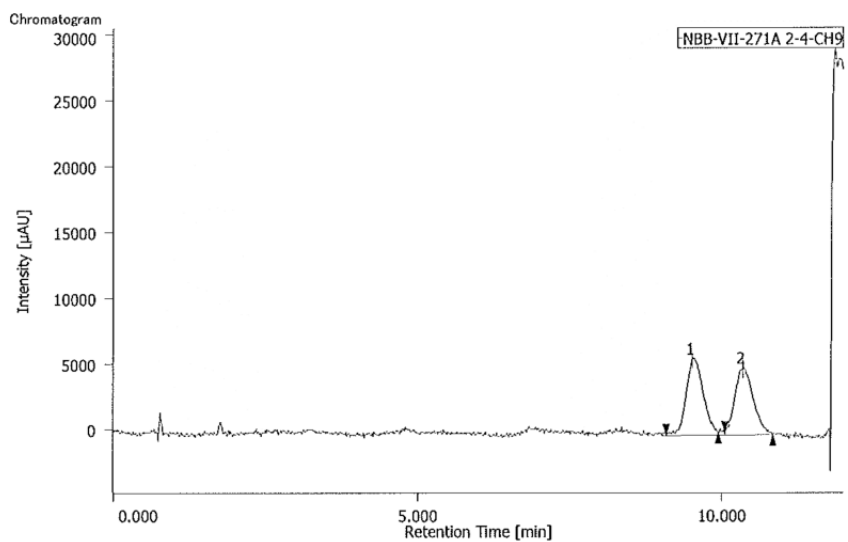

## Peak Information

| # | Peak Name | CH | tR [min] | Area [μV-sec] | Height [μV] | Area%  | Peak Start | Peak End | Peak Width | Resolution | Symmetry Factor |
|---|-----------|----|----------|---------------|-------------|--------|------------|----------|------------|------------|-----------------|
| 1 | Unknown   | 9  | 9.520    | 115034        | 5926        | 51.640 | 9.093      | 9.947    | 0.292      | 1.589      | 1.154           |
| 2 | Unknown   | 9  | 10.347   | 107729        | 5211        | 48.360 | 10.053     | 10.640   | 0.322      | N/A        | 1.233           |

1 / 1

Figure SI-12D. Chiral SFC data of racemic compound **15a**.

NBB-VIII-83-2B Col2 5MeOH 15min nbb-viii-83-2b 2/9/2012 12:11:21 PM

## Analytical Report SFC

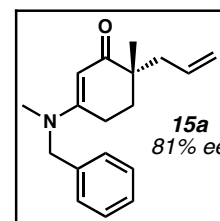

## Chromatogram Information

|                      |                                               |
|----------------------|-----------------------------------------------|
| User Name            | User                                          |
| HPLC System Name     | Jasco SFC w PDA                               |
| Injection Date       | 2/9/2012 11:28:39 AM                          |
| Volume               | 5.00 [μL]                                     |
| Sample #             | 11                                            |
| Project Name         | Cal Tech SFC                                  |
| Executed Sequence    | NBB-VIII-83-2B Col2 5MeOH 15min               |
| Chromatogram Name    | nbb-viii-83-2b                                |
| Sample Name          |                                               |
| Acquisition Time     | 12.0 [min]                                    |
| Acquisition Sequence | NBB-VIII-83-2B Col2 5MeOH 15min               |
| Control Method       | Solv 1 Col 2 Isocratic 5B 5mL_min 10MPa 15min |

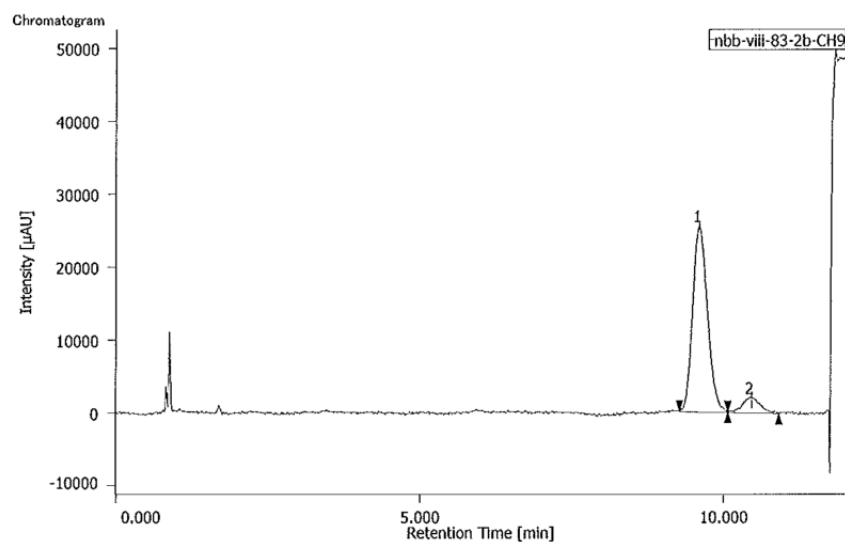

## Peak Information

| # | Peak Name | CH | TR [min] | Area [μV·sec] | Height [μV] | Area%  | Peak Start | Peak End | Peak Width | Resolution | Symmetry Factor |
|---|-----------|----|----------|---------------|-------------|--------|------------|----------|------------|------------|-----------------|
| 1 | Unknown   | 9  | 9.600    | 429906        | 25542       | 80.503 | 9.280      | 10.067   | 0.281      | 1.780      | 1.178           |
| 2 | Unknown   | 9  | 10.453   | 45114         | 2182        | 9.497  | 10.067     | 10.907   | 0.305      | N/A        | 1.075           |

1/1

Figure SI-12E. Chiral SFC data enantioenriched of compound **15a**.

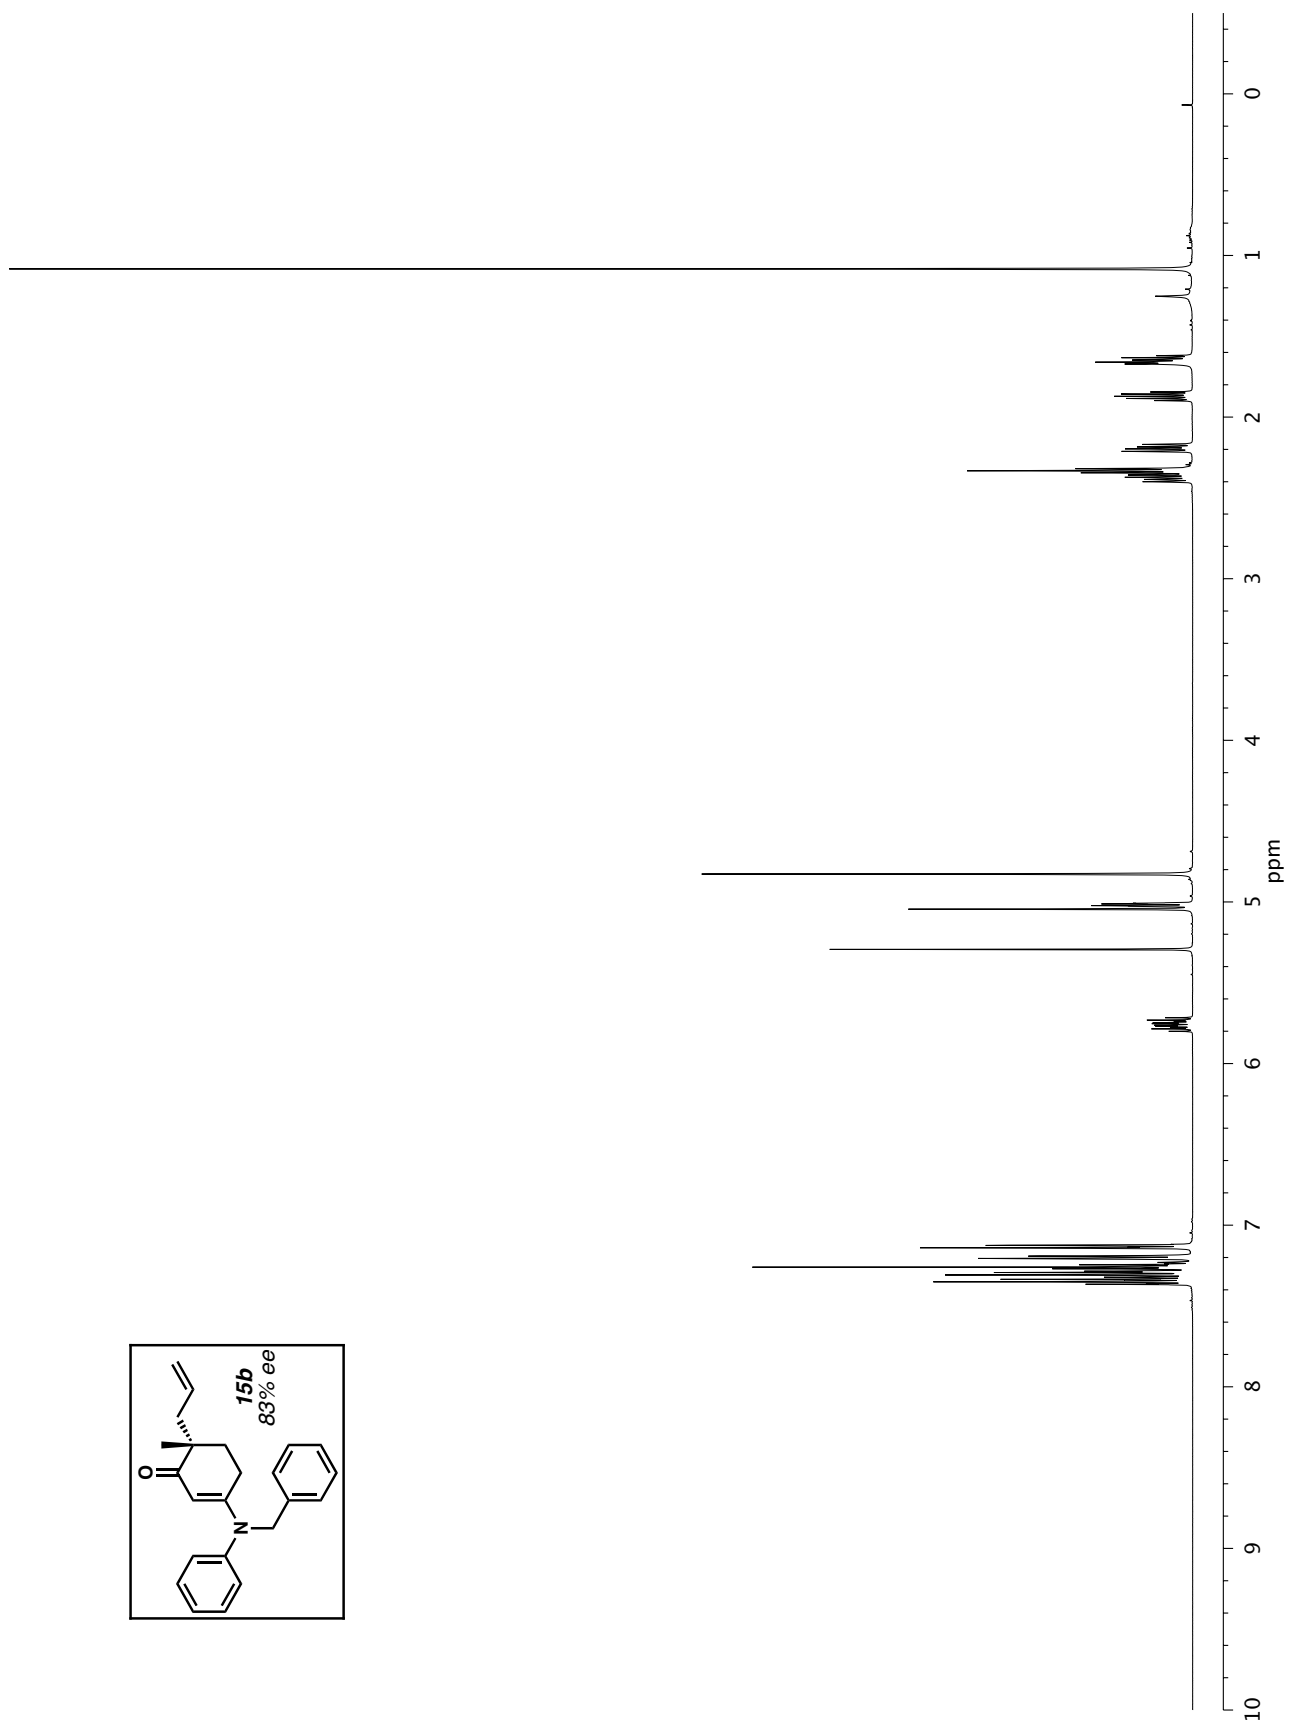Figure SI-13A. <sup>1</sup>H NMR (500 MHz, CDCl<sub>3</sub>) of compound **15b**.



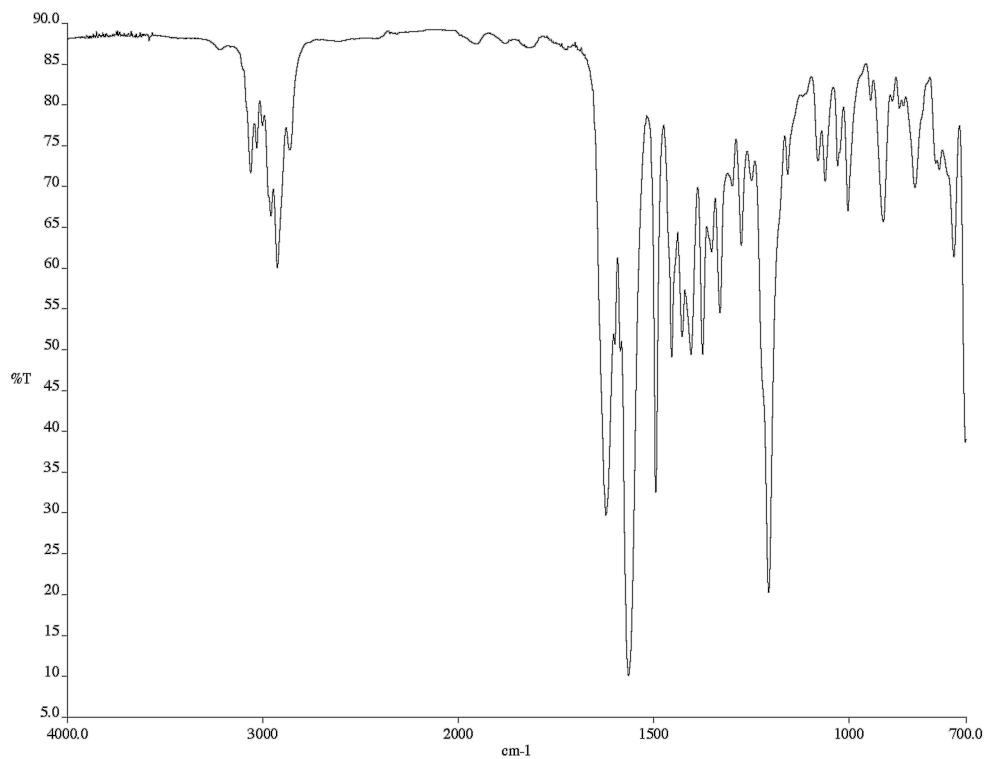

Figure SI-13B. Infrared spectrum (thin film/NaCl) of compound **15b**.

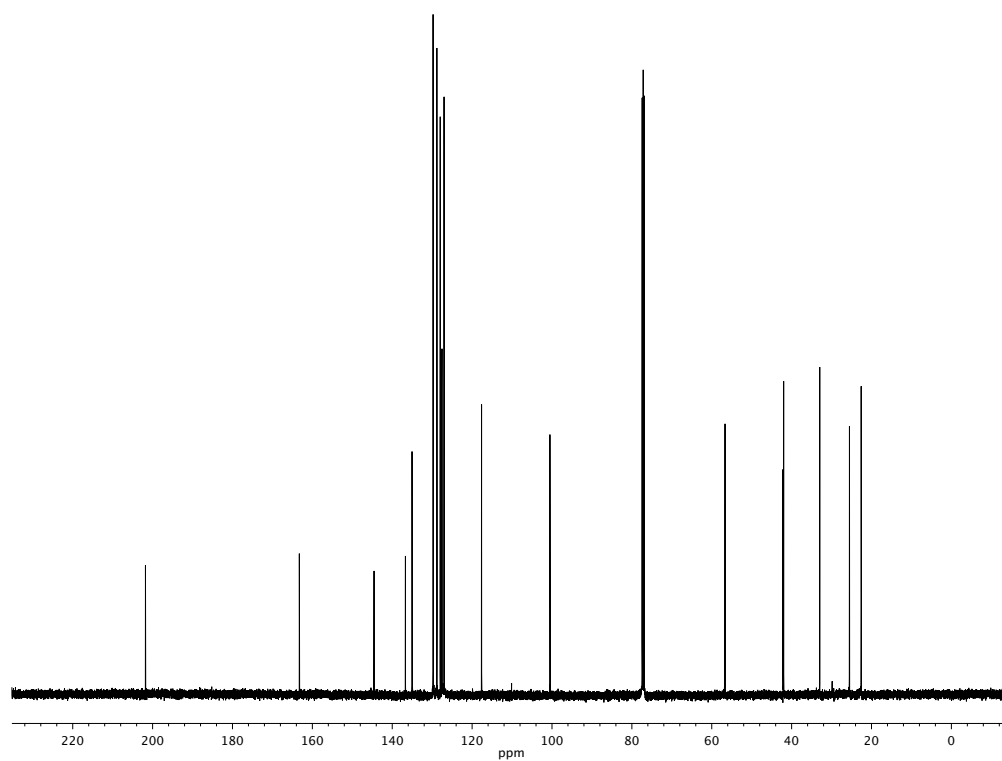

Figure SI-13C. <sup>13</sup>C NMR (125 MHz, CDCl<sub>3</sub>) of compound **15b**.

NBB-VII-273 Sub3 Col4 5MeOH-2 NBB-VII-273 PhBn 10/27/2011 4:52:15 PM

## Analytical Report SFC

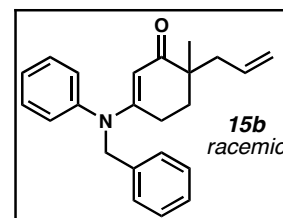

## Chromatogram Information

User: Jasco SFC w PDA  
 HPLC System Name: 10/27/2011 1:54:49 PM  
 Injection Date: 5.00 [μL]  
 Volume: 51  
 Sample #: Cal Tech SFC  
 Project Name: NBB-VII-273 Sub3 Col4 5MeOH-2  
 Executed Sequence: NBB-VII-273 PhBn  
 Chromatogram Name: 12.0 [min]  
 Sample Name: NBB-VII-273 Sub3 Col4 5MeOH-2  
 Acquisition Time: NBB-VII-273 Sub3 Col4 5MeOH-2  
 Acquisition Sequence: Solv 1 Col 4 Isocratic 5B 5mL\_min 10MPa 15min  
 Control Method:

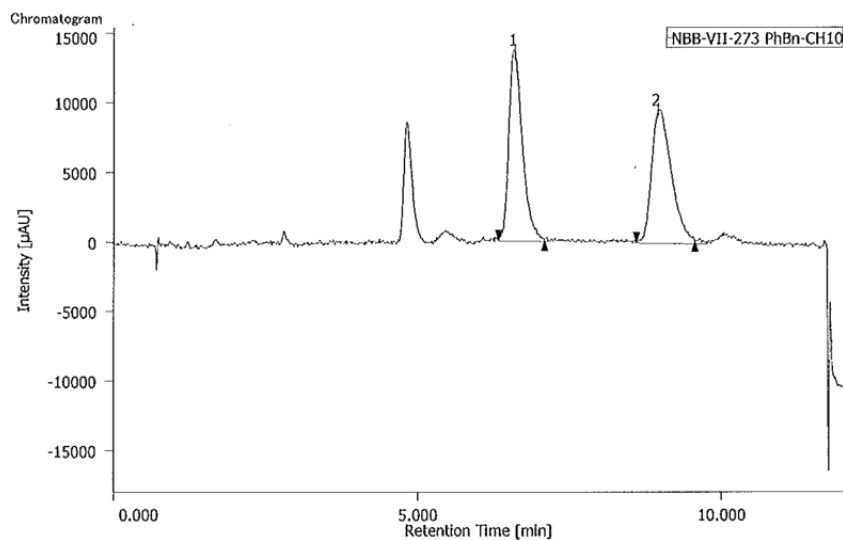

## Peak Information

| # | Peak Name | CH | TR [min] | Area [μV·sec] | Height [μV] | Area%  | Peak Start | Peak End | Peak Width | Resolution | Symmetry Factor |
|---|-----------|----|----------|---------------|-------------|--------|------------|----------|------------|------------|-----------------|
| 1 | Unknown   | 10 | 6.600    | 215088        | 13790       | 49.635 | 6.333      | 7.093    | 0.231      | 4.806      | 1.429           |
| 2 | Unknown   | 10 | 8.960    | 218252        | 9641        | 50.365 | 8.600      | 9.560    | 0.348      | N/A        | 1.695           |

1 / 1

Figure SI-13D. Chiral SFC data of racemic compound **15b**.

NBB-VIII-85-2A Col4 5% MeOH 15min nbb-viii-85-2a 6/27/2012 11:39:10 AM

## Analytical Report SFC

## Chromatogram Information

User: Jasco SFC w PDA  
 HPLC System Name: 6/27/2012 11:12:52 AM  
 Injection Date: 5.00 [μL]  
 Volume: 51  
 Sample #: Cal Tech SFC  
 Project Name: NBB-VIII-85-2A Col4 5% MeOH 15min  
 Executed Sequence: nbb-viii-85-2a  
 Chromatogram Name: 12.0 [min]  
 Sample Name: NBB-VIII-85-2A Col4 5% MeOH 15min  
 Acquisition Time: Solv 1 Col 4 Isocratic 5B 5mL\_min 10MPa 15min  
 Acquisition Sequence:  
 Control Method:

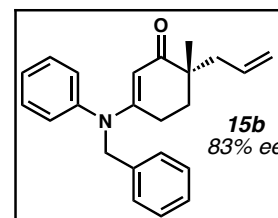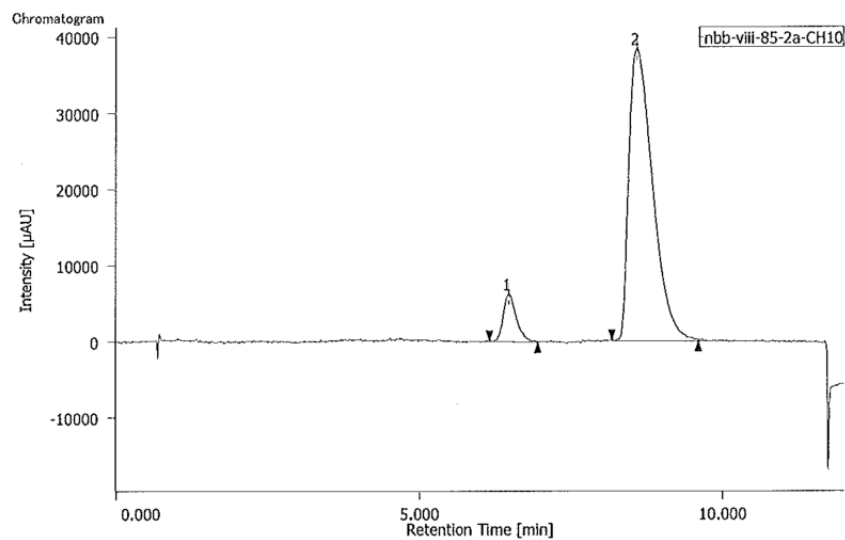

## Peak Information

| # | Peak Name | CH | tR [min] | Area [μV-sec] | Height [μV] | Area%  | Peak Start | Peak End | Peak Width | Resolution | Symmetry Factor |
|---|-----------|----|----------|---------------|-------------|--------|------------|----------|------------|------------|-----------------|
| 1 | Unknown   | 10 | 6.480    | 94763         | 6347        | 8.346  | 6.160      | 6.960    | 0.221      | 3.889      | 1.384           |
| 2 | Unknown   | 10 | 8.600    | 1040639       | 38422       | 91.654 | 8.187      | 9.600    | 0.422      | N/A        | 1.835           |

1 / 1

Figure SI-13E. Chiral SFC data of enantioenriched compound **15b**.

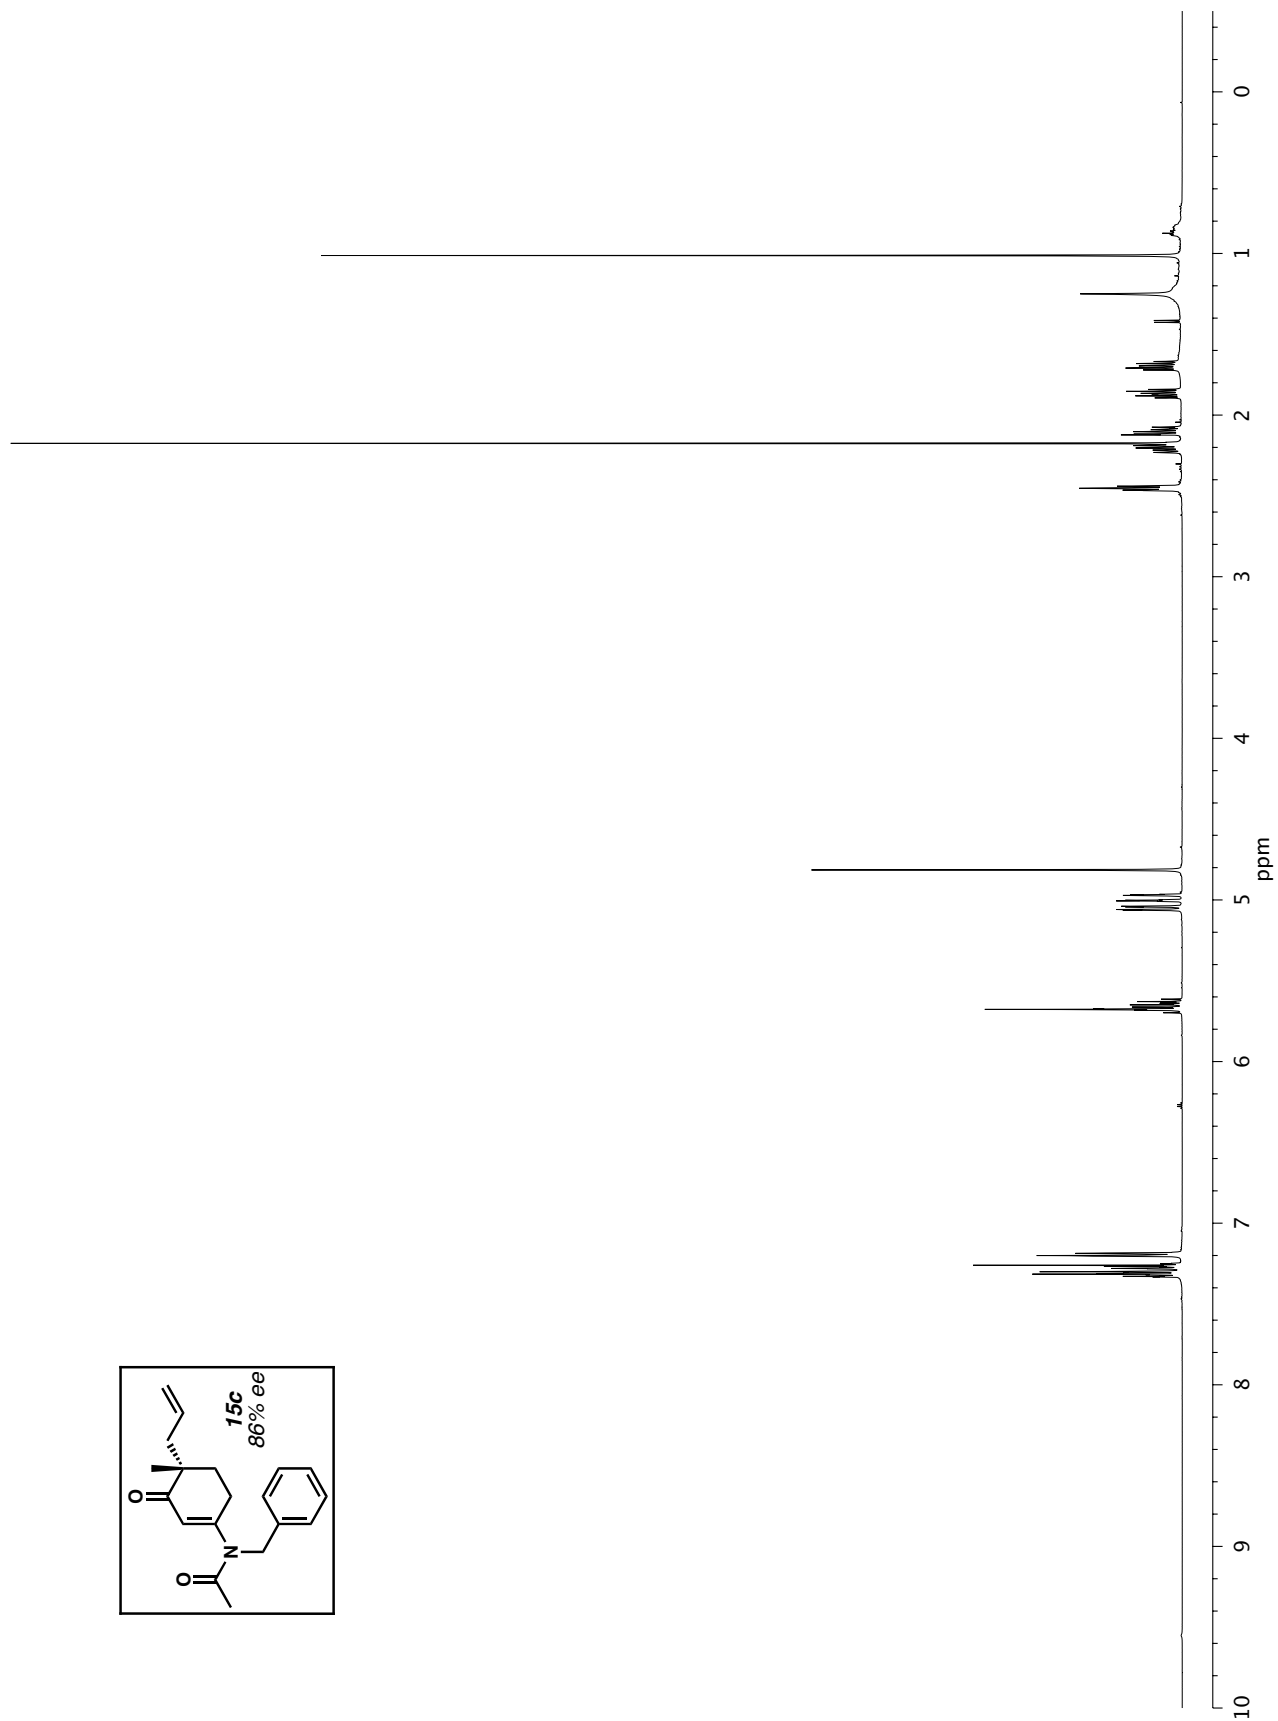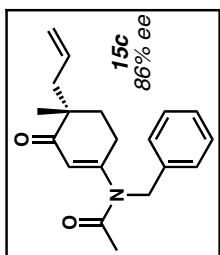Figure SI-144. <sup>1</sup>H NMR (500 MHz, CDCl<sub>3</sub>) of compound **15c**.

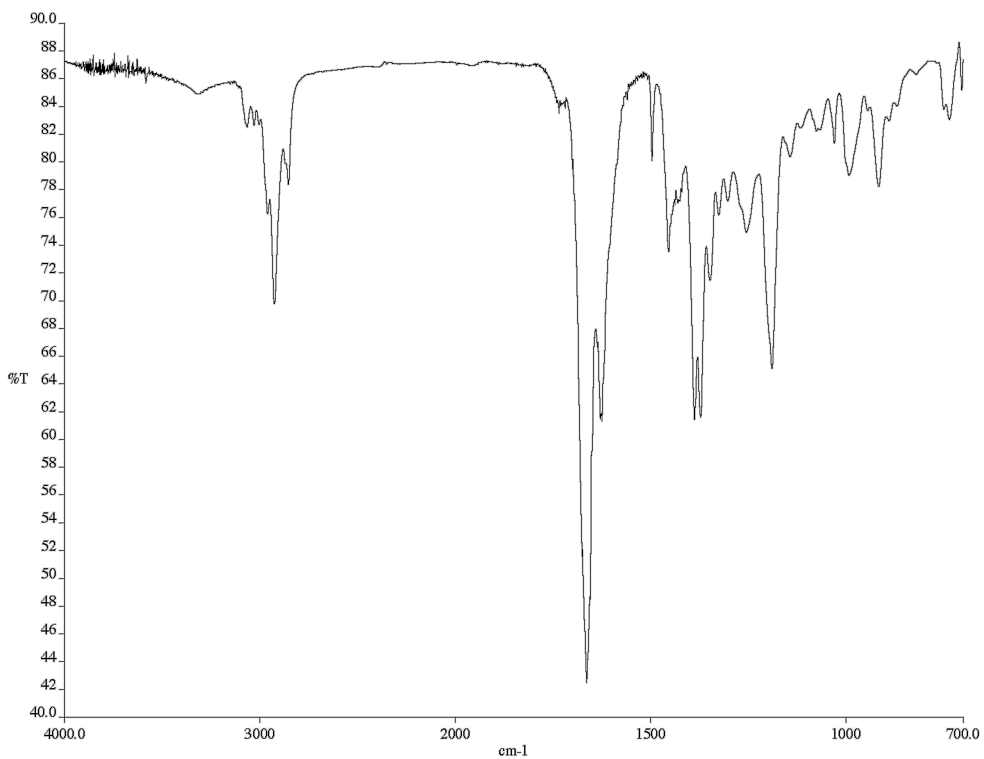

Figure SI-14B. Infrared spectrum (thin film/NaCl) of compound **15c**.

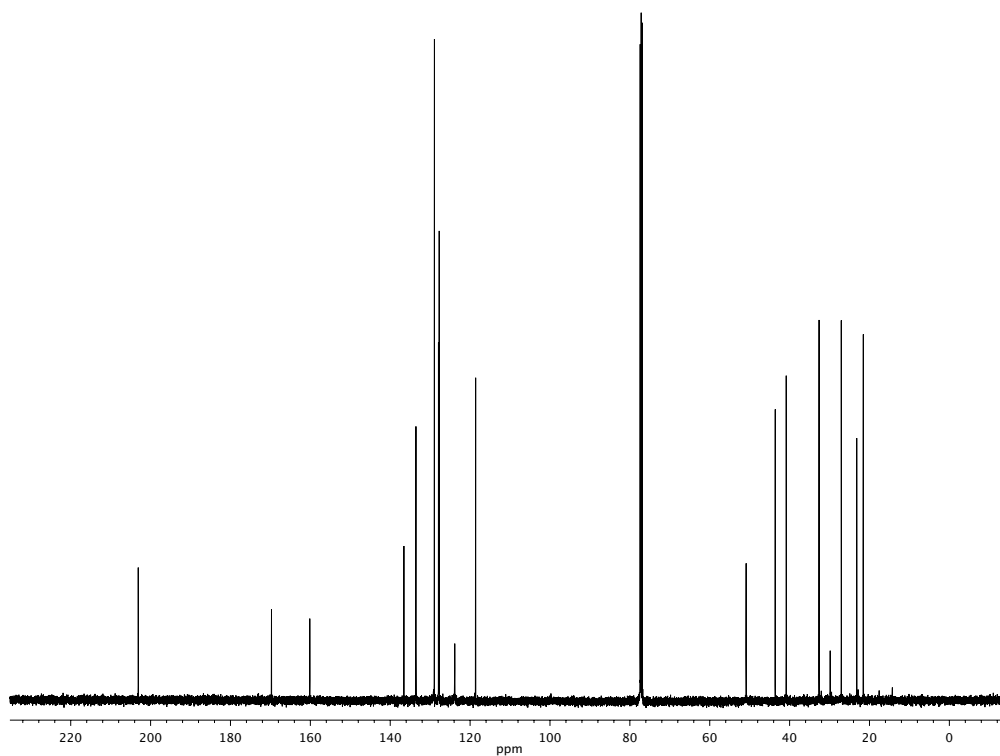

Figure SI-14C. <sup>13</sup>C NMR (125 MHz, CDCl<sub>3</sub>) of compound **15c**.

Data File C:\CHEM32\1\DATA\NBB\AHC 2012-10-04 14-26-18\NBB-IX-257RAC.D  
 Sample Name: NBB-IX-257rac

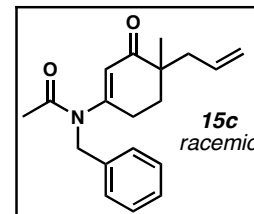

```
=====
Acq. Operator   : NBB                               Seq. Line :    2
Acq. Instrument : Instrument 1                       Location  : P2-C-01
Injection Date  : 10/4/2012 2:29:45 PM              Inj       :    1
                                                    Inj Volume: 5 µl
Different Inj Volume from Sequence !   Actual Inj Volume : 10 µl
Acq. Method     : C:\Chem32\1\DATA\NBB\AHC 2012-10-04 14-26-18\S1C2 12MIN 5.M
Last changed    : 5/19/2011 9:00:59 PM by DCB
Analysis Method : C:\CHEM32\1\DATA\NBB\AHC 2012-10-04 14-26-18\NBB-IX-257RAC.D\DA.M (S1C2
                  12MIN 5.M)
Last changed    : 10/4/2012 2:52:53 PM by JNI
                  (modified after loading)
Method Info     : S1C2 12min 5.M: 5% MeOH, AD-H 3 mL/min, 12 min
Sample Info     : NBB-IX-257 Racemic, 4-3-1
=====
```

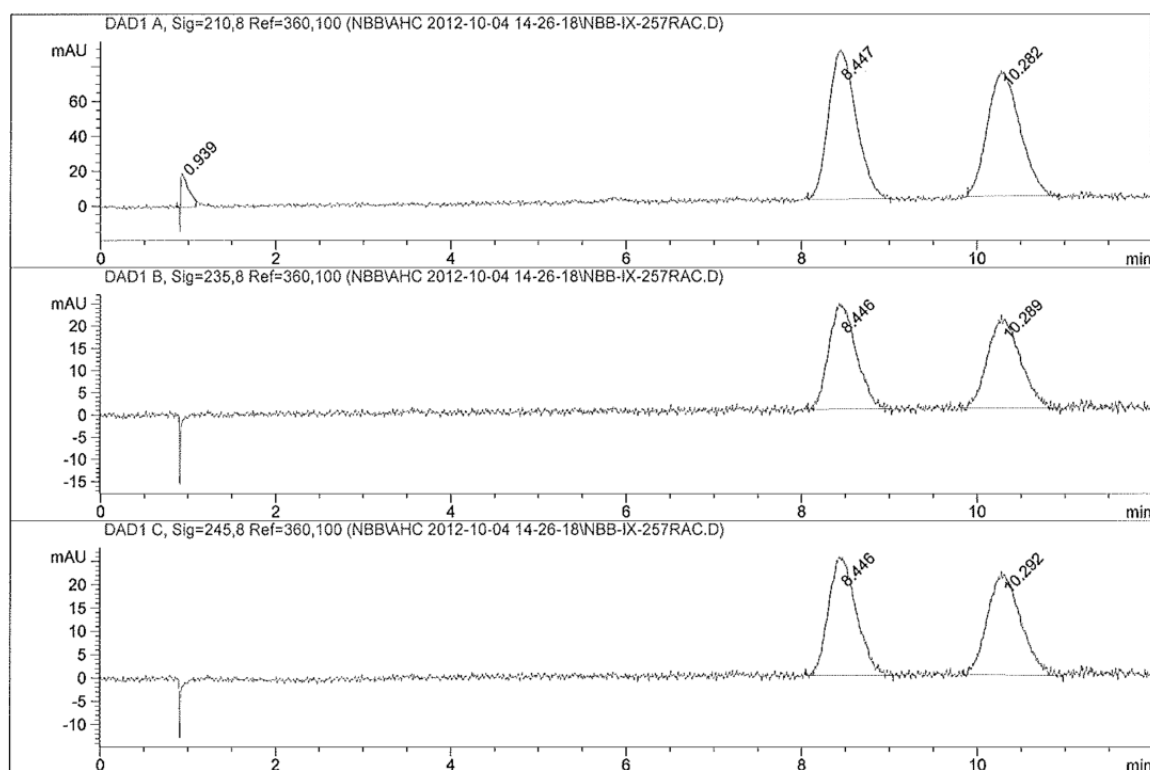

Figure SI-14D. Chiral SFC data of racemic compound **15c**.

Data File C:\CHEM32\1\DATA\NBB\AHC 2012-10-04 14-26-18\NBB-IX-257RAC.D  
 Sample Name: NBB-IX-257rac

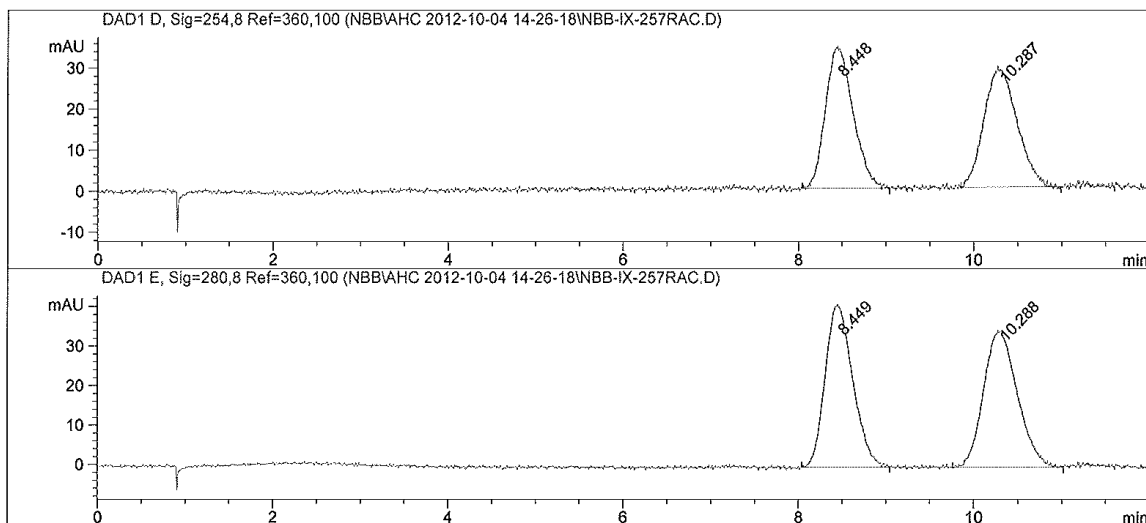

=====  
 Area Percent Report  
 =====

Sorted By : Signal  
 Multiplier : 1.0000  
 Dilution : 1.0000  
 Use Multiplier & Dilution Factor with ISTDs

Signal 1: DAD1 A, Sig=210,8 Ref=360,100

| Peak # | RetTime [min] | Type | Width [min] | Area [mAU*s] | Height [mAU] | Area %  |
|--------|---------------|------|-------------|--------------|--------------|---------|
| 1      | 0.939         | BB   | 0.0949      | 113.87008    | 18.23328     | 2.9604  |
| 2      | 8.447         | BB   | 0.3010      | 1879.52710   | 85.33506     | 48.8635 |
| 3      | 10.282        | BB   | 0.3308      | 1853.08533   | 70.93210     | 48.1761 |

Totals : 3846.48251 174.50044

Signal 2: DAD1 B, Sig=235,8 Ref=360,100

| Peak # | RetTime [min] | Type | Width [min] | Area [mAU*s] | Height [mAU] | Area %  |
|--------|---------------|------|-------------|--------------|--------------|---------|
| 1      | 8.446         | BB   | 0.3360      | 517.12830    | 23.56898     | 49.5066 |
| 2      | 10.289        | BB   | 0.4053      | 527.43506    | 19.89780     | 50.4934 |

Totals : 1044.56335 43.46678

Data File C:\CHEM32\1\DATA\NBB\AHC 2012-10-04 14-26-18\NBB-IX-257RAC.D  
 Sample Name: NBB-IX-257rac

Signal 3: DAD1 C, Sig=245,8 Ref=360,100

| Peak #   | RetTime [min] | Type | Width [min] | Area [mAU*s] | Height [mAU] | Area %  |
|----------|---------------|------|-------------|--------------|--------------|---------|
| 1        | 8.446         | BB   | 0.3447      | 560.93591    | 25.10540     | 49.4459 |
| 2        | 10.292        | BB   | 0.3865      | 573.50763    | 21.00747     | 50.5541 |
| Totals : |               |      |             | 1134.44354   | 46.11286     |         |

Signal 4: DAD1 D, Sig=254,8 Ref=360,100

| Peak #   | RetTime [min] | Type | Width [min] | Area [mAU*s] | Height [mAU] | Area %  |
|----------|---------------|------|-------------|--------------|--------------|---------|
| 1        | 8.448         | BB   | 0.3431      | 760.15375    | 34.23129     | 49.9424 |
| 2        | 10.287        | BB   | 0.4083      | 761.90826    | 28.46026     | 50.0576 |
| Totals : |               |      |             | 1522.06201   | 62.69156     |         |

Signal 5: DAD1 E, Sig=280,8 Ref=360,100

| Peak #   | RetTime [min] | Type | Width [min] | Area [mAU*s] | Height [mAU] | Area %  |
|----------|---------------|------|-------------|--------------|--------------|---------|
| 1        | 8.449         | BB   | 0.3437      | 912.00861    | 40.97363     | 49.7294 |
| 2        | 10.288        | BB   | 0.4101      | 921.93524    | 34.23816     | 50.2706 |
| Totals : |               |      |             | 1833.94385   | 75.21178     |         |

=====  
 \*\*\* End of Report \*\*\*





Data File C:\CHEM32\1\DATA\NBB\AHC 2012-10-04 15-47-38\NBB-IX-257A.D  
 Sample Name: NBB-IX-257A

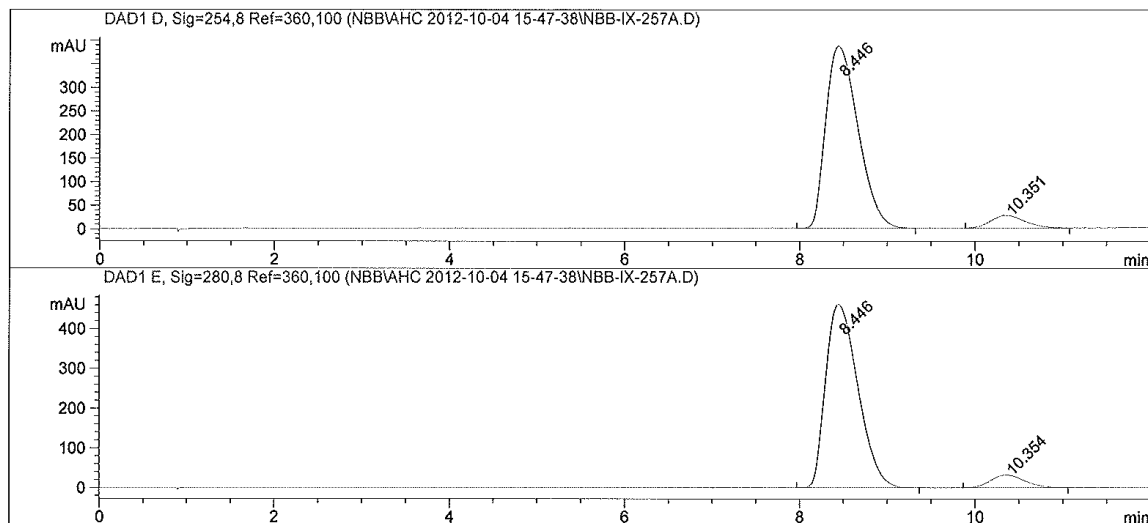

=====  
 Area Percent Report  
 =====

Sorted By : Signal  
 Multiplier : 1.0000  
 Dilution : 1.0000  
 Use Multiplier & Dilution Factor with ISTDs

Signal 1: DAD1 A, Sig=210,8 Ref=360,100

| Peak # | RetTime [min] | Type | Width [min] | Area [mAU*s] | Height [mAU] | Area %  |
|--------|---------------|------|-------------|--------------|--------------|---------|
| 1      | 0.943         | BB   | 0.1079      | 128.53369    | 17.05869     | 0.4895  |
| 2      | 8.446         | BB   | 0.4090      | 2.43412e4    | 943.31750    | 92.6927 |
| 3      | 10.354        | BB   | 0.4117      | 1790.38196   | 67.02154     | 6.8179  |

Totals : 2.62601e4 1027.39774

Signal 2: DAD1 B, Sig=235,8 Ref=360,100

| Peak # | RetTime [min] | Type | Width [min] | Area [mAU*s] | Height [mAU] | Area %  |
|--------|---------------|------|-------------|--------------|--------------|---------|
| 1      | 8.447         | BB   | 0.4024      | 6847.52051   | 267.69025    | 93.1500 |
| 2      | 10.344        | BB   | 0.3904      | 503.54898    | 18.68495     | 6.8500  |

Totals : 7351.06949 286.37520

Data File C:\CHEM32\1\DATA\NBB\AHC 2012-10-04 15-47-38\NBB-IX-257A.D  
 Sample Name: NBB-IX-257A

Signal 3: DAD1 C, Sig=245,8 Ref=360,100

| Peak # | RetTime [min] | Type | Width [min] | Area [mAU*s] | Height [mAU] | Area %  |
|--------|---------------|------|-------------|--------------|--------------|---------|
| 1      | 8.446         | BB   | 0.4026      | 7314.68262   | 285.79251    | 93.2437 |
| 2      | 10.349        | BB   | 0.3876      | 530.01166    | 19.84396     | 6.7563  |

Totals :                                   7844.69427   305.63647

Signal 4: DAD1 D, Sig=254,8 Ref=360,100

| Peak # | RetTime [min] | Type | Width [min] | Area [mAU*s] | Height [mAU] | Area %  |
|--------|---------------|------|-------------|--------------|--------------|---------|
| 1      | 8.446         | BB   | 0.4107      | 9876.51074   | 385.71722    | 93.1672 |
| 2      | 10.351        | BB   | 0.4197      | 724.33203    | 26.76538     | 6.8328  |

Totals :                                   1.06008e4   412.48260

Signal 5: DAD1 E, Sig=280,8 Ref=360,100

| Peak # | RetTime [min] | Type | Width [min] | Area [mAU*s] | Height [mAU] | Area %  |
|--------|---------------|------|-------------|--------------|--------------|---------|
| 1      | 8.446         | BB   | 0.4065      | 1.17996e4    | 461.17719    | 93.2482 |
| 2      | 10.354        | BB   | 0.4160      | 854.37073    | 31.95074     | 6.7518  |

Totals :                                   1.26540e4   493.12793

=====  
 \*\*\* End of Report \*\*\*

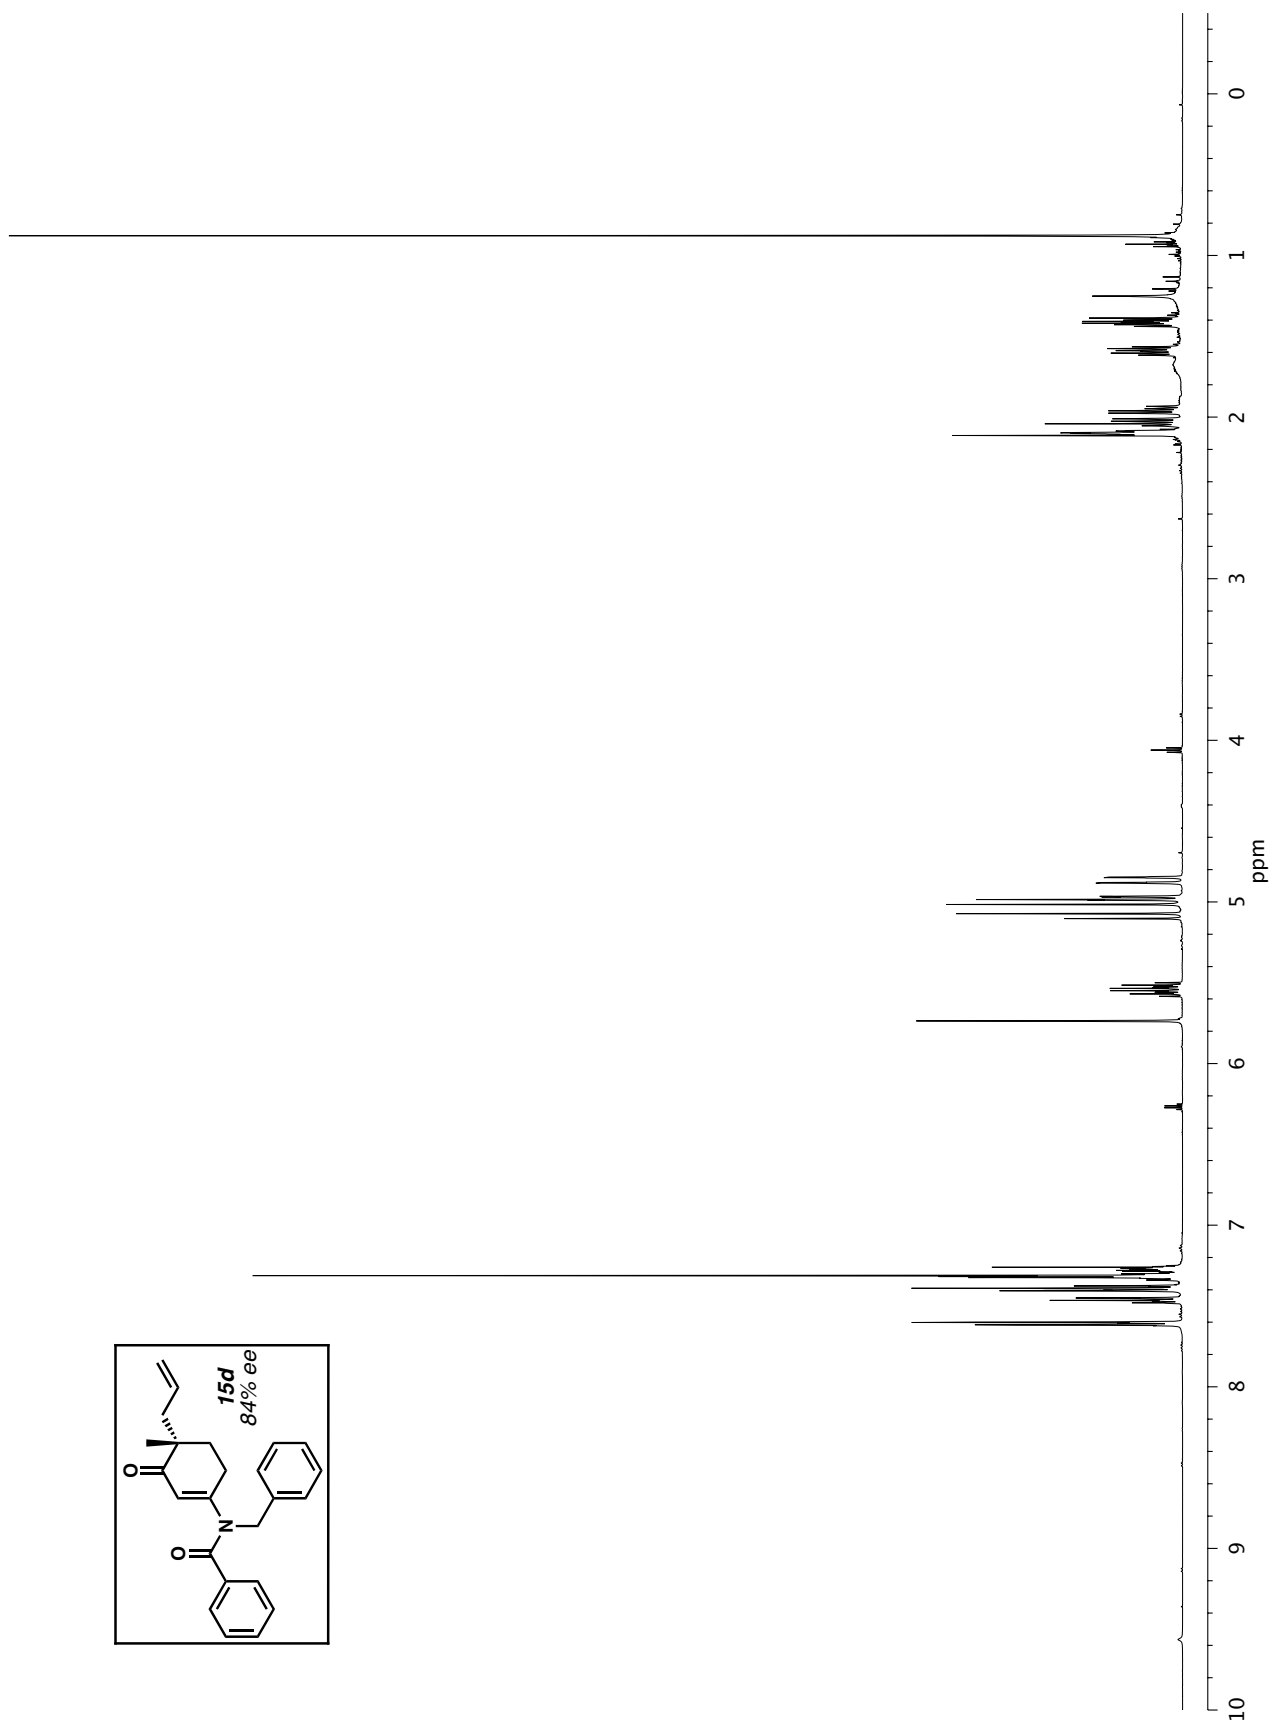Figure SI-15A.  $^1\text{H NMR}$  (500 MHz,  $\text{CDCl}_3$ ) of compound **15d**.

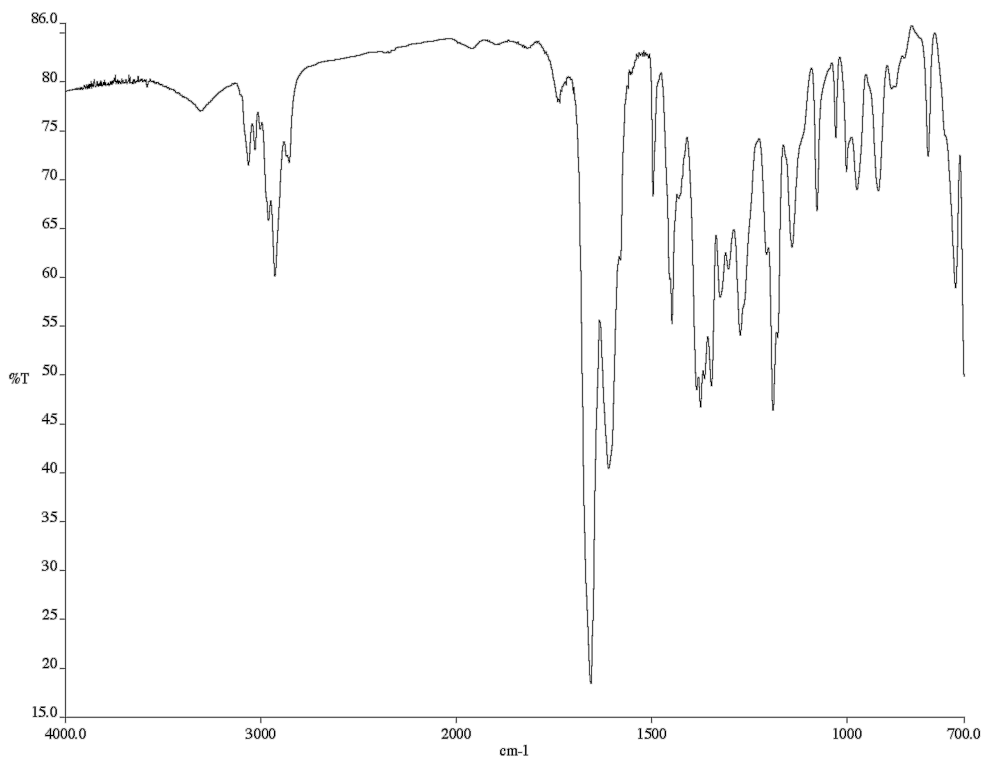

Figure SI-15B. Infrared spectrum (thin film/NaCl) of compound **15d**.

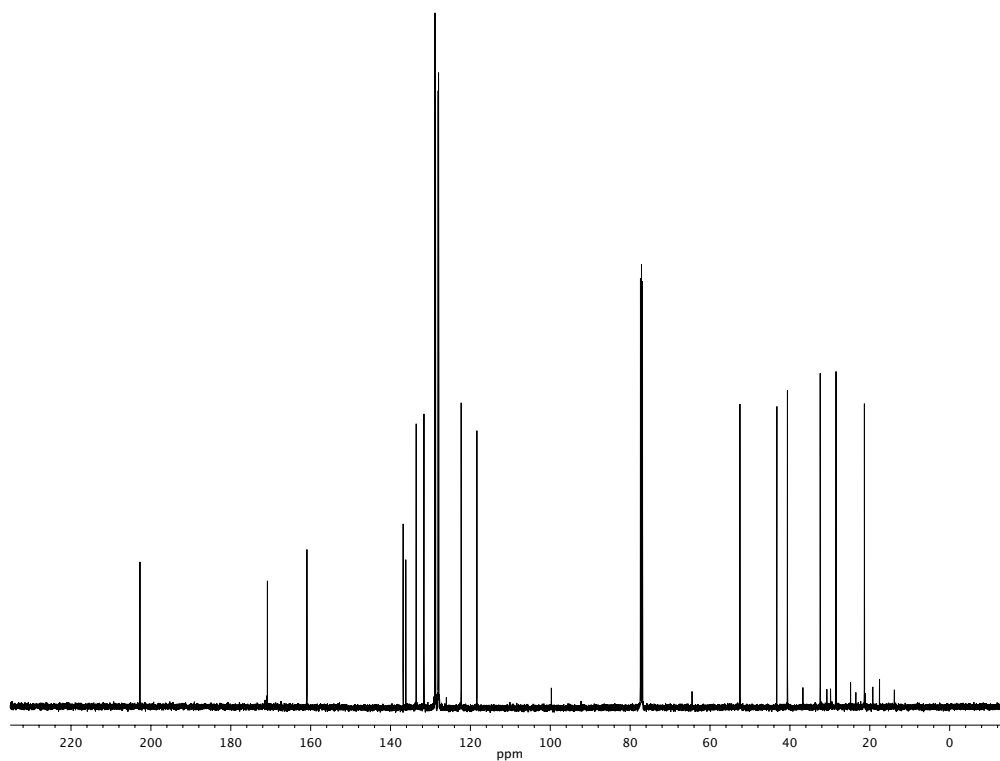

Figure SI-15C. <sup>13</sup>C NMR (125 MHz, CDCl<sub>3</sub>) of compound **15d**.

Data File C:\CHEM32\1\DATA\NBB\AHC 2012-10-05 16-30-33\NBB-IX-259RAC.D  
 Sample Name: NBB-IX-259rac

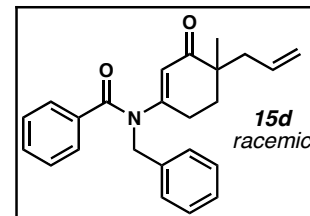

```

=====
Acq. Operator   : NBB                               Seq. Line :    4
Acq. Instrument : Instrument 1                       Location  : P2-C-02
Injection Date  : 10/5/2012 4:39:27 PM             Inj       :    1
                                                    Inj Volume: 5 µl
Different Inj Volume from Sequence ! Actual Inj Volume : 10 µl
Acq. Method     : C:\Chem32\1\DATA\NBB\AHC 2012-10-05 16-30-33\S1C2 20MIN 7-2.M
Last changed    : 10/5/2012 2:09:16 PM by JNI
Analysis Method : C:\CHEM32\1\DATA\NBB\AHC 2012-10-05 16-30-33\NBB-IX-259RAC.D\DA.M (S1C2
                20MIN 7-2.M)
Last changed    : 10/5/2012 5:12:31 PM by JNI
                (modified after loading)
Method Info     : S1C2 30min10.M: 7% IPA, AD-H 2.5 mL/min, 30 min
Sample Info     : NBB-IX-259 Racemic, 5-3-1
  
```

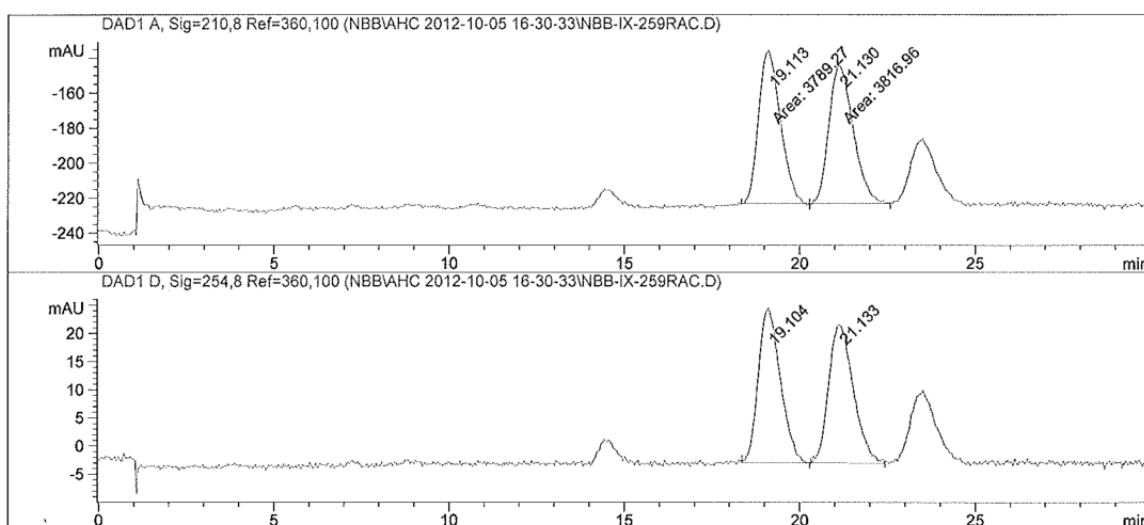

=====  
 Area Percent Report  
 =====

```

Sorted By      : Signal
Multiplier     : 1.0000
Dilution       : 1.0000
Use Multiplier & Dilution Factor with ISTDs
  
```

Signal 1: DAD1 A, Sig=210,8 Ref=360,100

| Peak # | RetTime [min] | Type | Width [min] | Area [mAU*s] | Height [mAU] | Area %  |
|--------|---------------|------|-------------|--------------|--------------|---------|
| 1      | 19.113        | MM   | 0.7220      | 3789.26807   | 87.47143     | 49.8180 |
| 2      | 21.130        | MM   | 0.8097      | 3816.95605   | 78.56348     | 50.1820 |

Totals : 7606.22412 166.03491

Instrument 1 10/5/2012 5:13:05 PM JNI

Page 1 of 2

Figure SI-15D. Chiral SFC data of racemic compound **15d**.

Data File C:\CHEM32\1\DATA\NBB\AHC 2012-10-05 16-30-33\NBB-IX-259RAC.D  
Sample Name: NBB-IX-259rac

Signal 2: DAD1 D, Sig=254,8 Ref=360,100

| Peak # | RetTime [min] | Type | Width [min] | Area [mAU*s] | Height [mAU] | Area %  |
|--------|---------------|------|-------------|--------------|--------------|---------|
| 1      | 19.104        | BB   | 0.6731      | 1203.76782   | 27.37041     | 49.9413 |
| 2      | 21.133        | BB   | 0.7281      | 1206.59875   | 24.43527     | 50.0587 |

Totals :                                   2410.36658   51.80568

=====

\*\*\* End of Report \*\*\*

Data File C:\CHEM32\1\DATA\NBB\AHC 2012-10-05 14-10-15\NBB-IX-259-3A.D  
 Sample Name: NBB-IX-259-3A

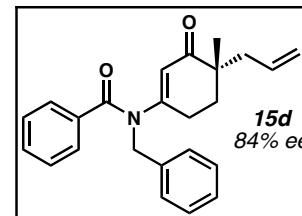

```

=====
Acq. Operator   : NBB                               Seq. Line :    5
Acq. Instrument : Instrument 1                       Location  : P2-C-03
Injection Date  : 10/5/2012 2:50:04 PM              Inj       :    1
                                                    Inj Volume: 5 µl
Different Inj Volume from Sequence ! Actual Inj Volume : 7 µl
Acq. Method     : C:\Chem32\1\DATA\NBB\AHC 2012-10-05 14-10-15\S1C2 20MIN 7-2.M
Last changed    : 10/5/2012 2:09:16 PM by JNI
Analysis Method : C:\CHEM32\1\DATA\NBB\AHC 2012-10-05 14-10-15\NBB-IX-259-3A.D\DA.M (S1C2
                20MIN 7-2.M)
Last changed    : 10/5/2012 4:21:35 PM by JNI
                (modified after loading)
Method Info     : S1C2 30min10.M: 7% IPA, AD-H 2.5 mL/min, 30 min
Sample Info     : NBB-IX-259-3A, Enantioenriched
  
```

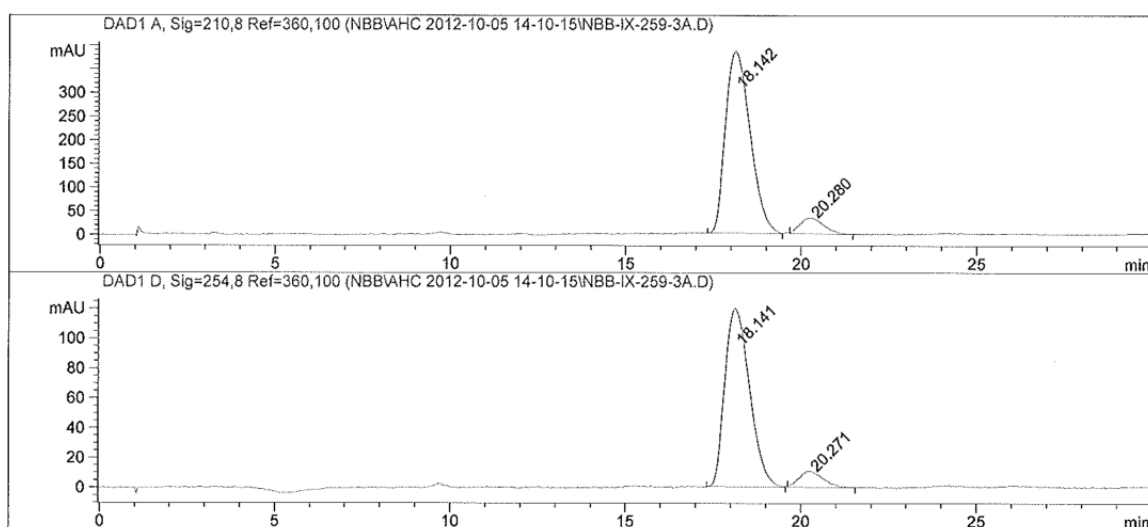

=====  
 Area Percent Report  
 =====

Sorted By : Signal  
 Multiplier : 1.0000  
 Dilution : 1.0000  
 Use Multiplier & Dilution Factor with ISTDs

Signal 1: DAD1 A, Sig=210,8 Ref=360,100

| Peak # | RetTime [min] | Type | Width [min] | Area [mAU*s] | Height [mAU] | Area %  |
|--------|---------------|------|-------------|--------------|--------------|---------|
| 1      | 18.142        | BB   | 0.7288      | 1.89158e4    | 383.96072    | 92.0466 |
| 2      | 20.280        | BB   | 0.5815      | 1634.45569   | 34.08136     | 7.9534  |

Totals : 2.05503e4 418.04209

Instrument 1 10/5/2012 4:22:01 PM JNI

Page 1 of 2

Figure SI-15E. Chiral SFC data of enantioenriched compound **15d**.



Data File C:\CHEM32\1\DATA\NBB\AHC 2012-10-05 14-10-15\NBB-IX-259-3A.D  
Sample Name: NBB-IX-259-3A

Signal 2: DAD1 D, Sig=254,8 Ref=360,100

| Peak # | RetTime [min] | Type | Width [min] | Area [mAU*s] | Height [mAU] | Area %  |
|--------|---------------|------|-------------|--------------|--------------|---------|
| 1      | 18.141        | BB   | 0.7748      | 5890.54053   | 119.55161    | 91.8569 |
| 2      | 20.271        | BB   | 0.6096      | 522.19653    | 10.69611     | 8.1431  |

Totals :                                   6412.73706  130.24772

=====  
\*\*\* End of Report \*\*\*

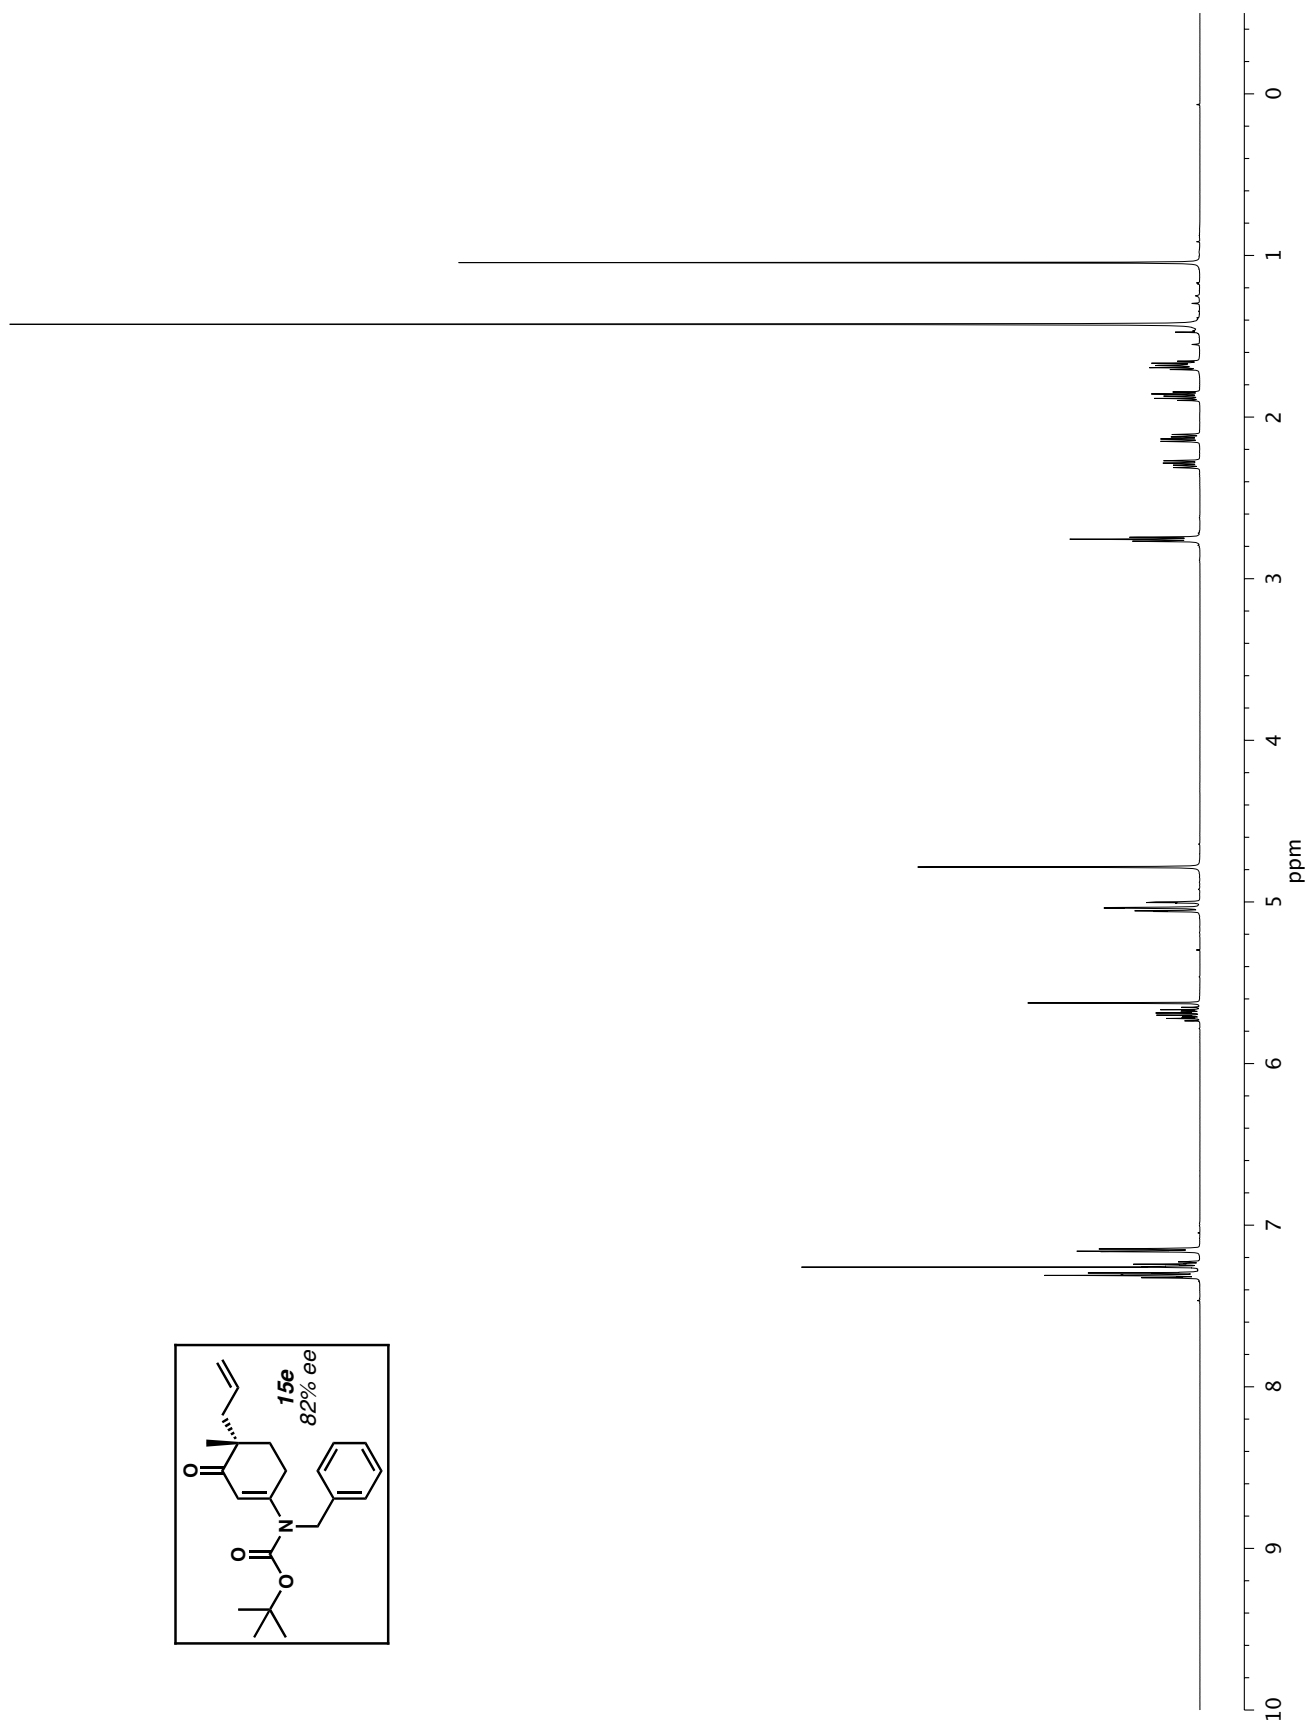Figure SI-16A.  $^1\text{H}$  NMR (500 MHz,  $\text{CDCl}_3$ ) of compound **15e**.

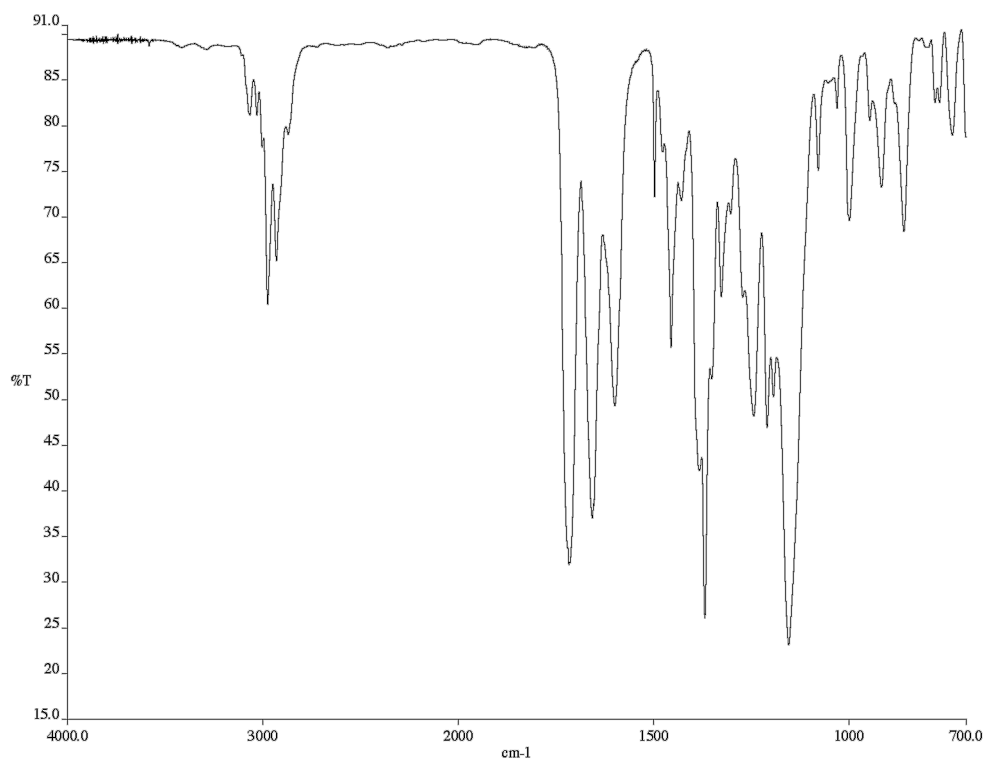

Figure SI-16B. Infrared spectrum (thin film/NaCl) of compound **15e**.

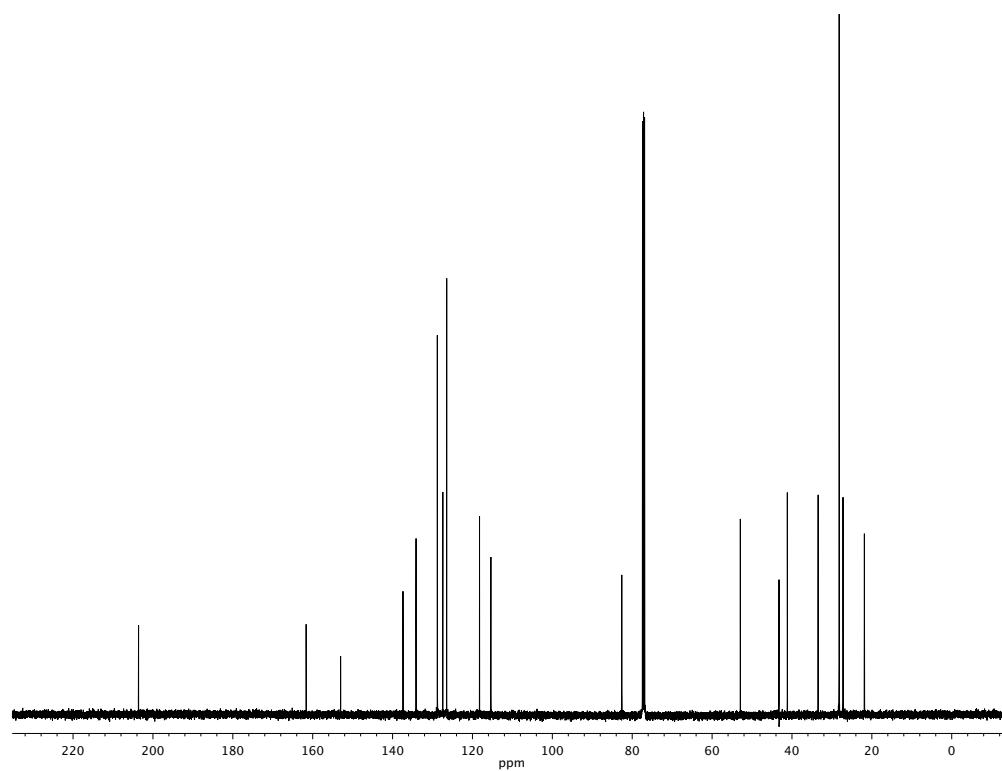

Figure SI-16C. <sup>13</sup>C NMR (125 MHz, CDCl<sub>3</sub>) of compound **15e**.

NBB-VII-261\_Sub46Col1 NBB-VII-261-6-3-1\_1-2 10/22/2011 11:00:54 AM

## Analytical Report SFC

## Chromatogram Information

User  
 HPLC System Name  
 Injection Date  
 Volume  
 Sample #  
 Project Name  
 Executed Sequence  
 Chromatogram Name  
 Sample Name  
 Acquisition Time  
 Acquisition Sequence  
 Control Method

User  
 Jasco SFC w/ PDA  
 10/21/2011 12:55:32 PM  
 5.00 [μL]  
 51  
 Cal Tech SFC  
 NBB-VII-261\_Sub46Col1  
 NBB-VII-261-6-3-1\_1-2  
 7.0 [min]  
 NBB-VII-261\_Sub46Col1  
 Solv 1 Col 1 Isocratic 7B 5mL\_min 10MPa 10min

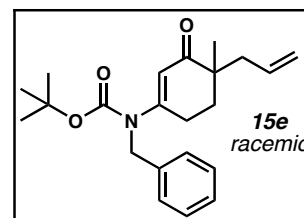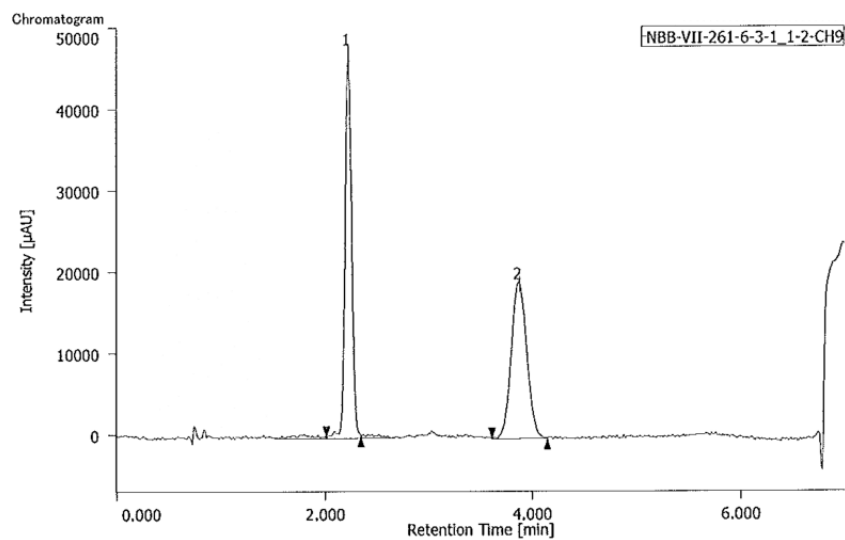

## Peak Information

| # | Peak Name | CH | tR [min] | Area [μV·sec] | Height [μV] | Area%  | Peak Start | Peak End | Peak Width | Resolution | Symmetry Factor |
|---|-----------|----|----------|---------------|-------------|--------|------------|----------|------------|------------|-----------------|
| 1 | Unknown   | 9  | 2.227    | 207330        | 47860       | 50.806 | 2.013      | 2.347    | 0.066      | 8.516      | 1.041           |
| 2 | Unknown   | 9  | 3.880    | 200750        | 19212       | 49.194 | 3.613      | 4.147    | 0.163      | N/A        | 0.999           |

1/1

Figure SI-16D. Chiral SFC data of racemic compound **15e**.

NBB-VIII-87A Col1 7 MeOH NBB-VIII-87A-2 12/16/2011 10:44:03 AM

## Analytical Report SFC

## Chromatogram Information

User  
 HPLC System Name  
 Injection Date  
 Volume  
 Sample #  
 Project Name  
 Executed Sequence  
 Chromatogram Name  
 Sample Name  
 Acquisition Time  
 Acquisition Sequence  
 Control Method

User  
 Jasco SFC w PDA  
 12/16/2011 10:34:12 AM  
 5.00 [μL]  
 51  
 Cal Tech SFC  
 NBB-VIII-87A Col1 7 MeOH  
 NBB-VIII-87A-2  
 7.0 [min]  
 NBB-VIII-87A Col1 7 MeOH  
 Solv 1 Col 1 Isocratic 7B 5mL\_min 10MPa 10min

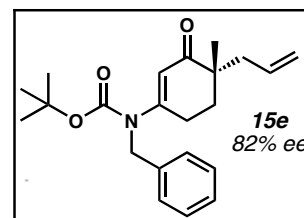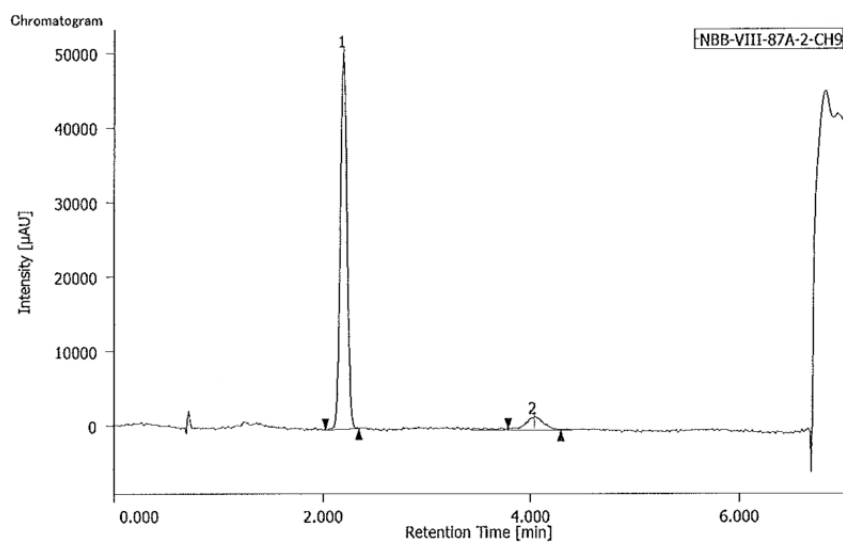

## Peak Information

| # | Peak Name | CH | tR [min] | Area [μV-sec] | Height [μV] | Area%  | Peak Start | Peak End | Peak Width | Resolution | Symmetry Factor |
|---|-----------|----|----------|---------------|-------------|--------|------------|----------|------------|------------|-----------------|
| 1 | Unknown   | 9  | 2.200    | 226470        | 50772       | 91.066 | 2.027      | 2.347    | 0.070      | 8.868      | 1.001           |
| 2 | Unknown   | 9  | 4.040    | 22218         | 1792        | 8.934  | 3.787      | 4.293    | 0.176      | N/A        | N/A             |

1 / 1

Figure SI-16E. Chiral SFC data of enantioenriched compound **15e**.

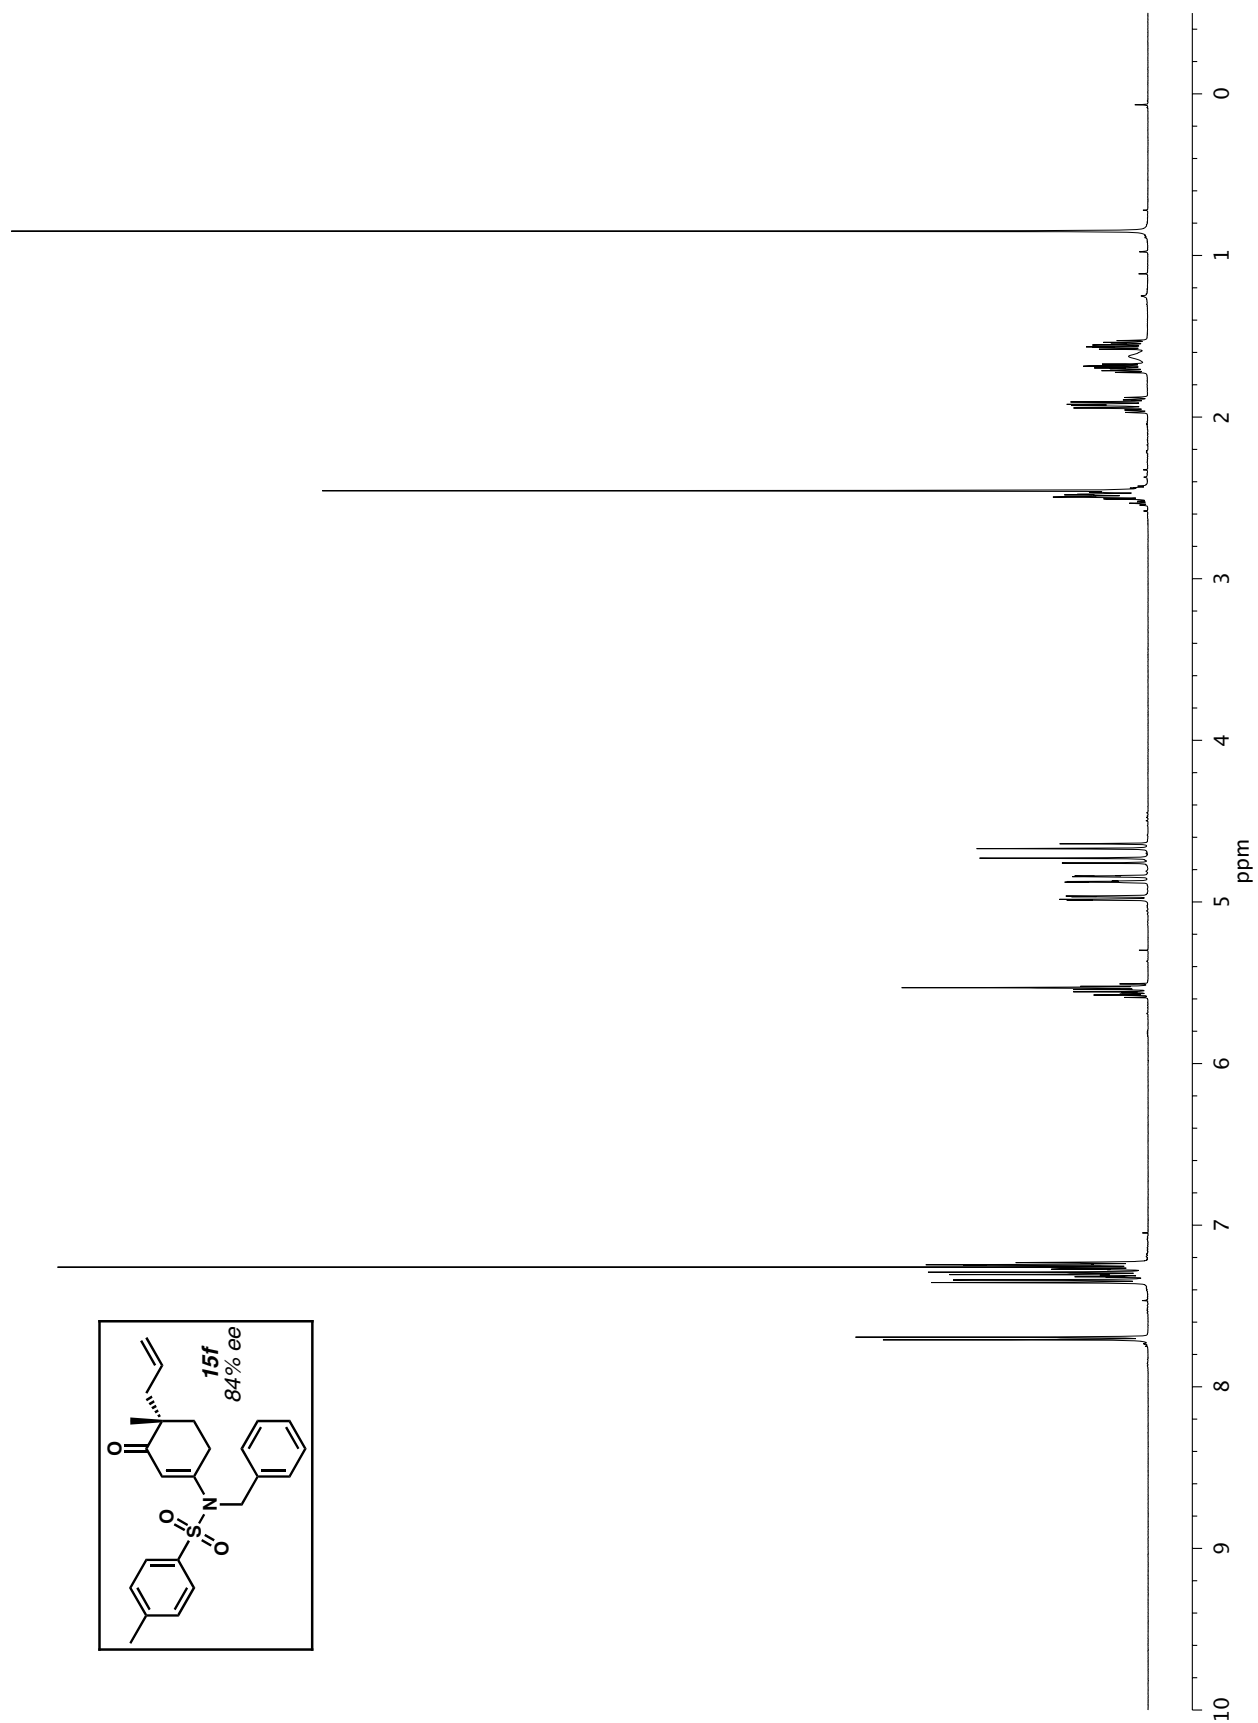Figure SI-17A.  $^1\text{H}$  NMR (500 MHz,  $\text{CDCl}_3$ ) of compound **15f**.

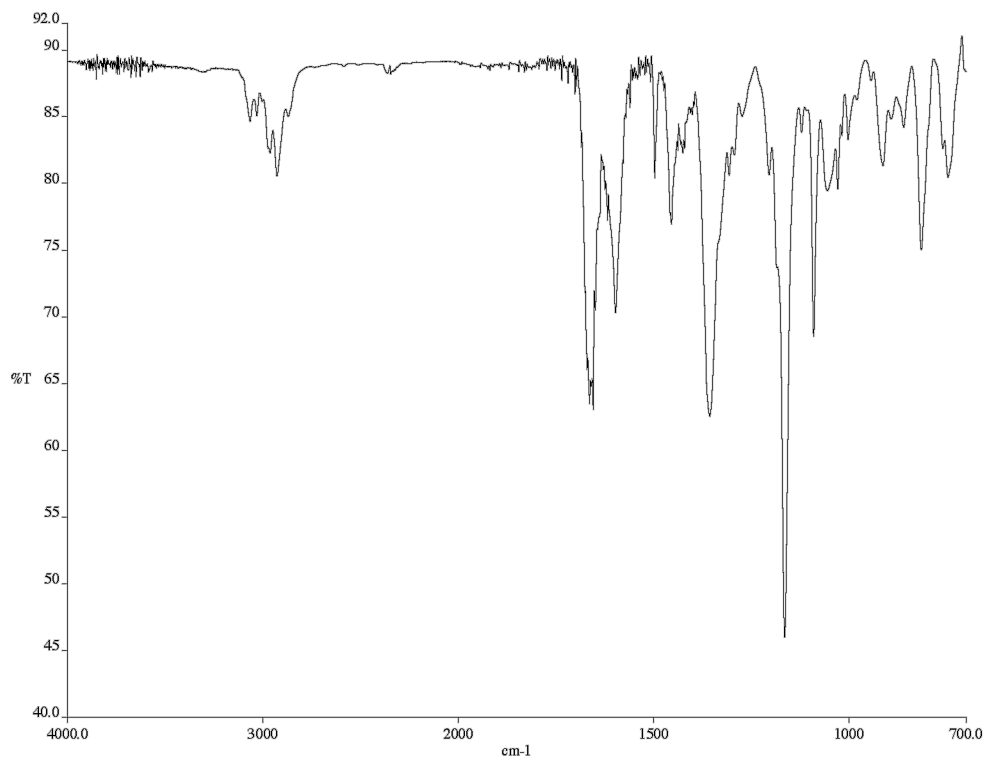

Figure SI-17B. Infrared spectrum (thin film/NaCl) of compound **15f**.

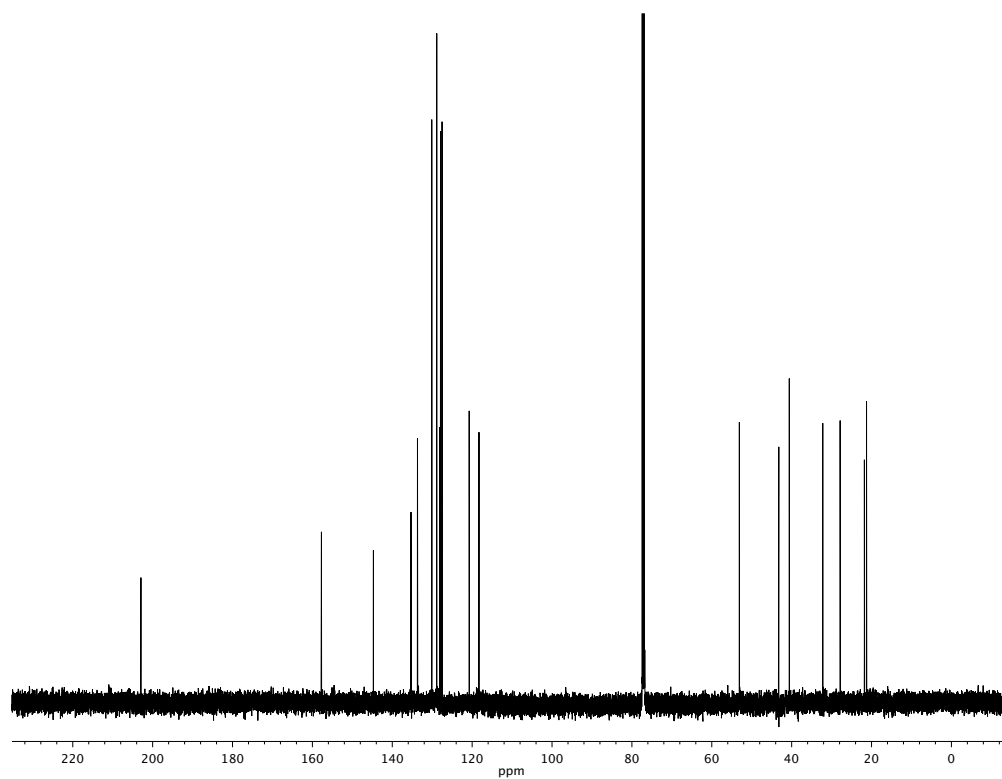

Figure SI-17C. <sup>13</sup>C NMR (125 MHz, CDCl<sub>3</sub>) of compound **15f**.

NBB\_VII\_261 NBB-VII-261-7-3-1\_1-5 10/20/2011 11:38:40 AM

## Analytical Report SFC

## Chromatogram Information

User: Jasco SFC w PDA  
 HPLC System Name: NBB\_VII\_261  
 Injection Date: 10/20/2011 11:20:35 AM  
 Volume: 5.00 [μL]  
 Sample #: 76  
 Project Name: Cal Tech SFC  
 Executed Sequence: NBB\_VII\_261  
 Chromatogram Name: NBB-VII-261-7-3-1\_1-5  
 Sample Name:  
 Acquisition Time: 7.0 [min]  
 Acquisition Sequence: NBB\_VII\_261  
 Control Method: Solv 1 Col 1 Isocratic 10B 5mL\_min 10MPa 10min  
 Meth

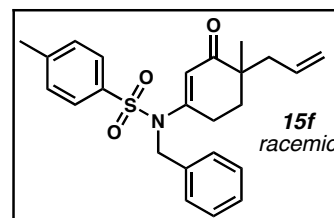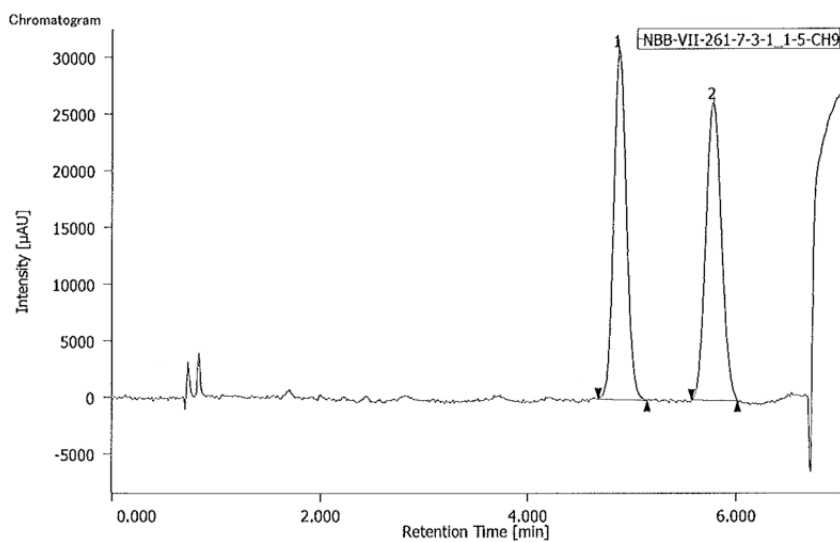

## Peak Information

| # | Peak Name | CH | tR [min] | Area [μV-sec] | Height [μV] | Area%  | Peak Start | Peak End | Peak Width | Resolution | Symmetry Factor |
|---|-----------|----|----------|---------------|-------------|--------|------------|----------|------------|------------|-----------------|
| 1 | Unknown   | 9  | 4.880    | 260592        | 30824       | 48.700 | 4.680      | 5.147    | 0.130      | 3.634      | 1.138           |
| 2 | Unknown   | 9  | 5.787    | 274504        | 26280       | 51.300 | 5.573      | 6.013    | 0.164      | N/A        | 1.041           |

Figure SI-17D. Chiral SFC data of racemic compound **15f**.



NBB-VIII-89A Col1 10 MeOH-3 NBB-VIII-89A-2 12/17/2011 12:59:35 PM

## Analytical Report SFC

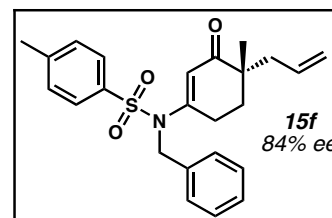

## Chromatogram Information

|                      |                                                |
|----------------------|------------------------------------------------|
| User Name            | User                                           |
| HPLC System Name     | Jasco SFC w PDA                                |
| Injection Date       | 12/17/2011 10:12:13 AM                         |
| Volume               | 5.00 [μL]                                      |
| Sample #             | 51                                             |
| Project Name         | Cal Tech SFC                                   |
| Executed Sequence    | NBB-VIII-89A Col1 10 MeOH-3                    |
| Chromatogram Name    | NBB-VIII-89A-2                                 |
| Sample Name          |                                                |
| Acquisition Time     | 7.0 [min]                                      |
| Acquisition Sequence | NBB-VIII-89A Col1 10 MeOH-3                    |
| Control Method       | Solv 1 Col 1 Isocratic 10B 5mL_min 10MPa 10min |

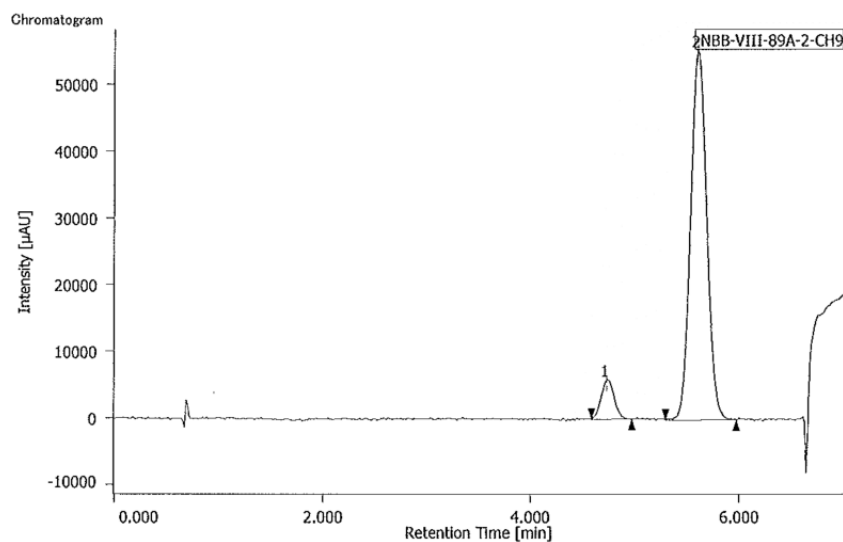

## Peak Information

| # | Peak Name | CH | tR [min] | Area [μV-sec] | Height [μV] | Area%  | Peak Start | Peak End | Peak Width | Resolution | Symmetry Factor |
|---|-----------|----|----------|---------------|-------------|--------|------------|----------|------------|------------|-----------------|
| 1 | Unknown   | 9  | 4.733    | 51755         | 5932        | 8.031  | 4.587      | 4.973    | 0.136      | 3.386      | 1.126           |
| 2 | Unknown   | 9  | 5.600    | 592694        | 65307       | 91.969 | 5.293      | 5.973    | 0.166      | N/A        | 1.117           |

1 / 1

Figure SI-17E. Chiral SFC data of enantioenriched compound **15f**.

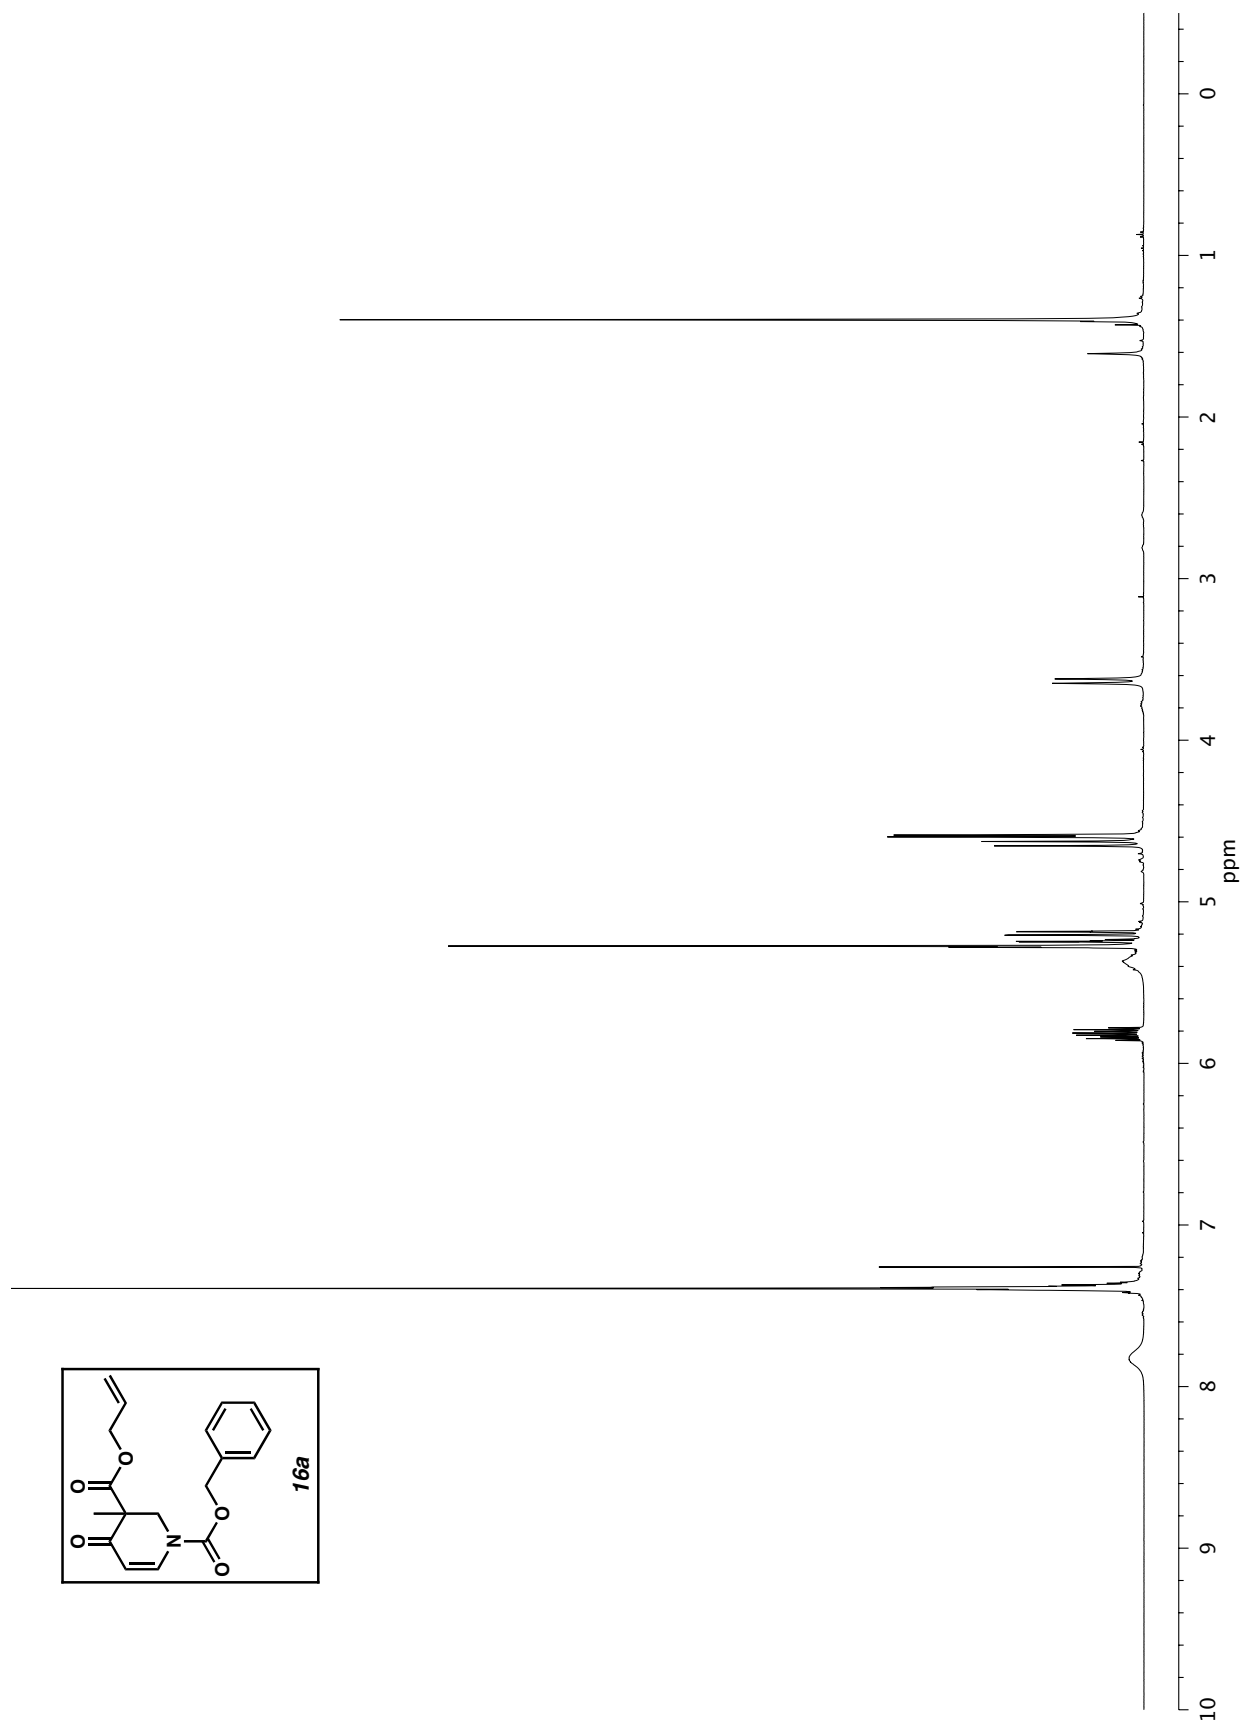Figure SI-18A.  $^1\text{H}$  NMR (500 MHz,  $\text{CDCl}_3$ ) of compound **16a**.

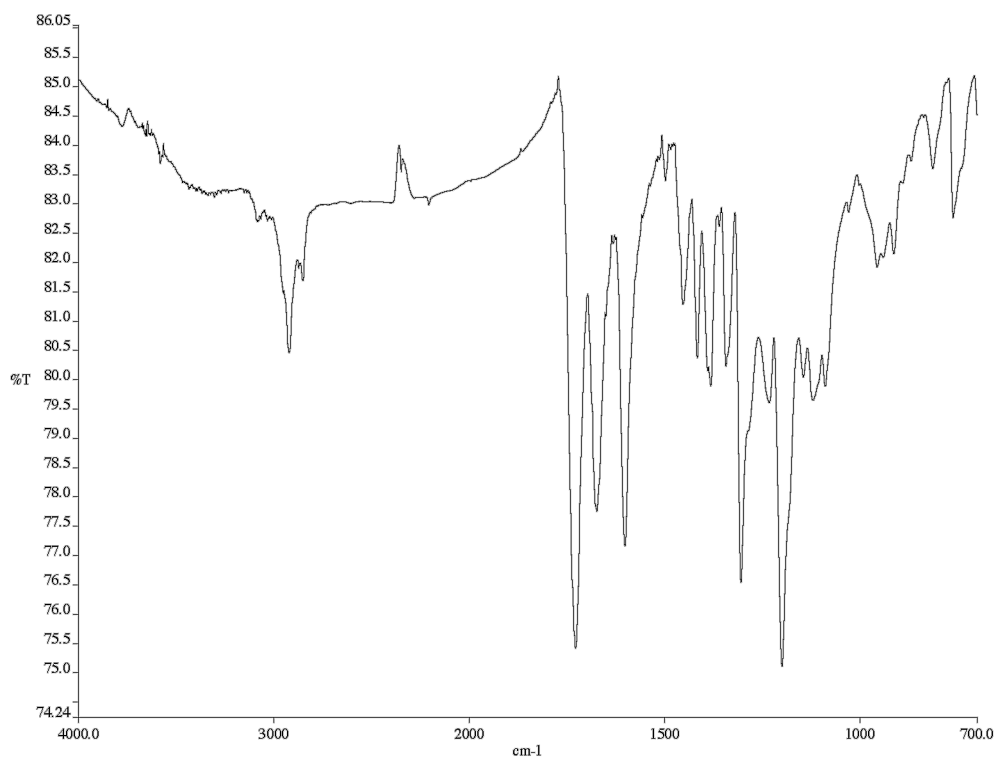

Figure SI-18B. Infrared spectrum (thin film/NaCl) of compound **16a**.

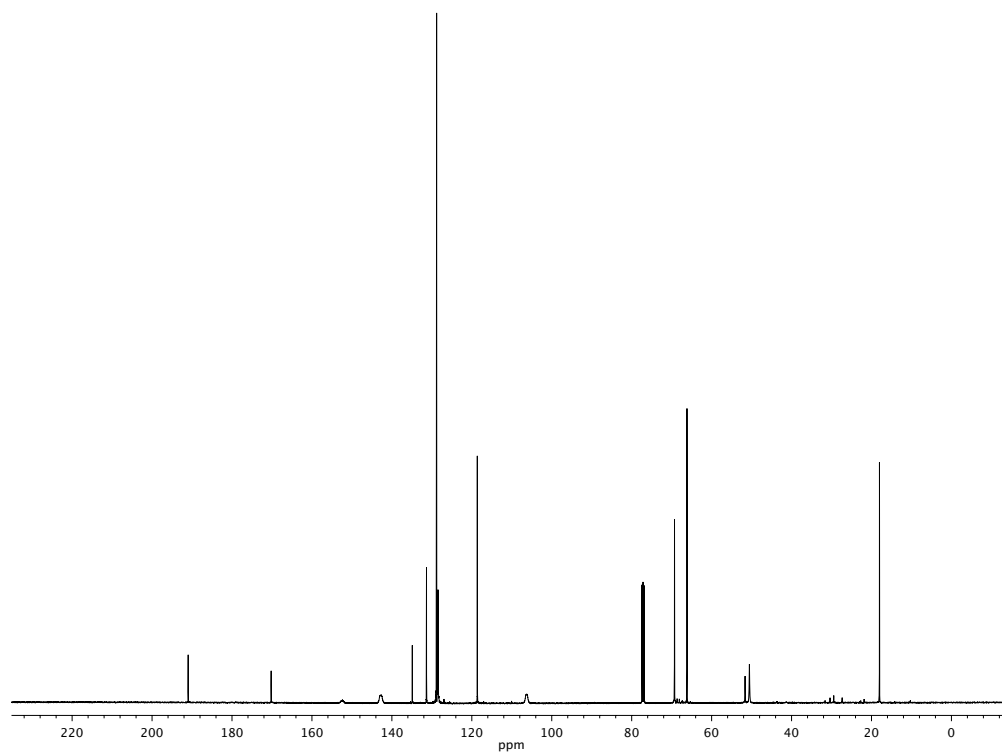

Figure SI-18C. <sup>13</sup>C NMR (125 MHz, CDCl<sub>3</sub>) of compound **16a**.

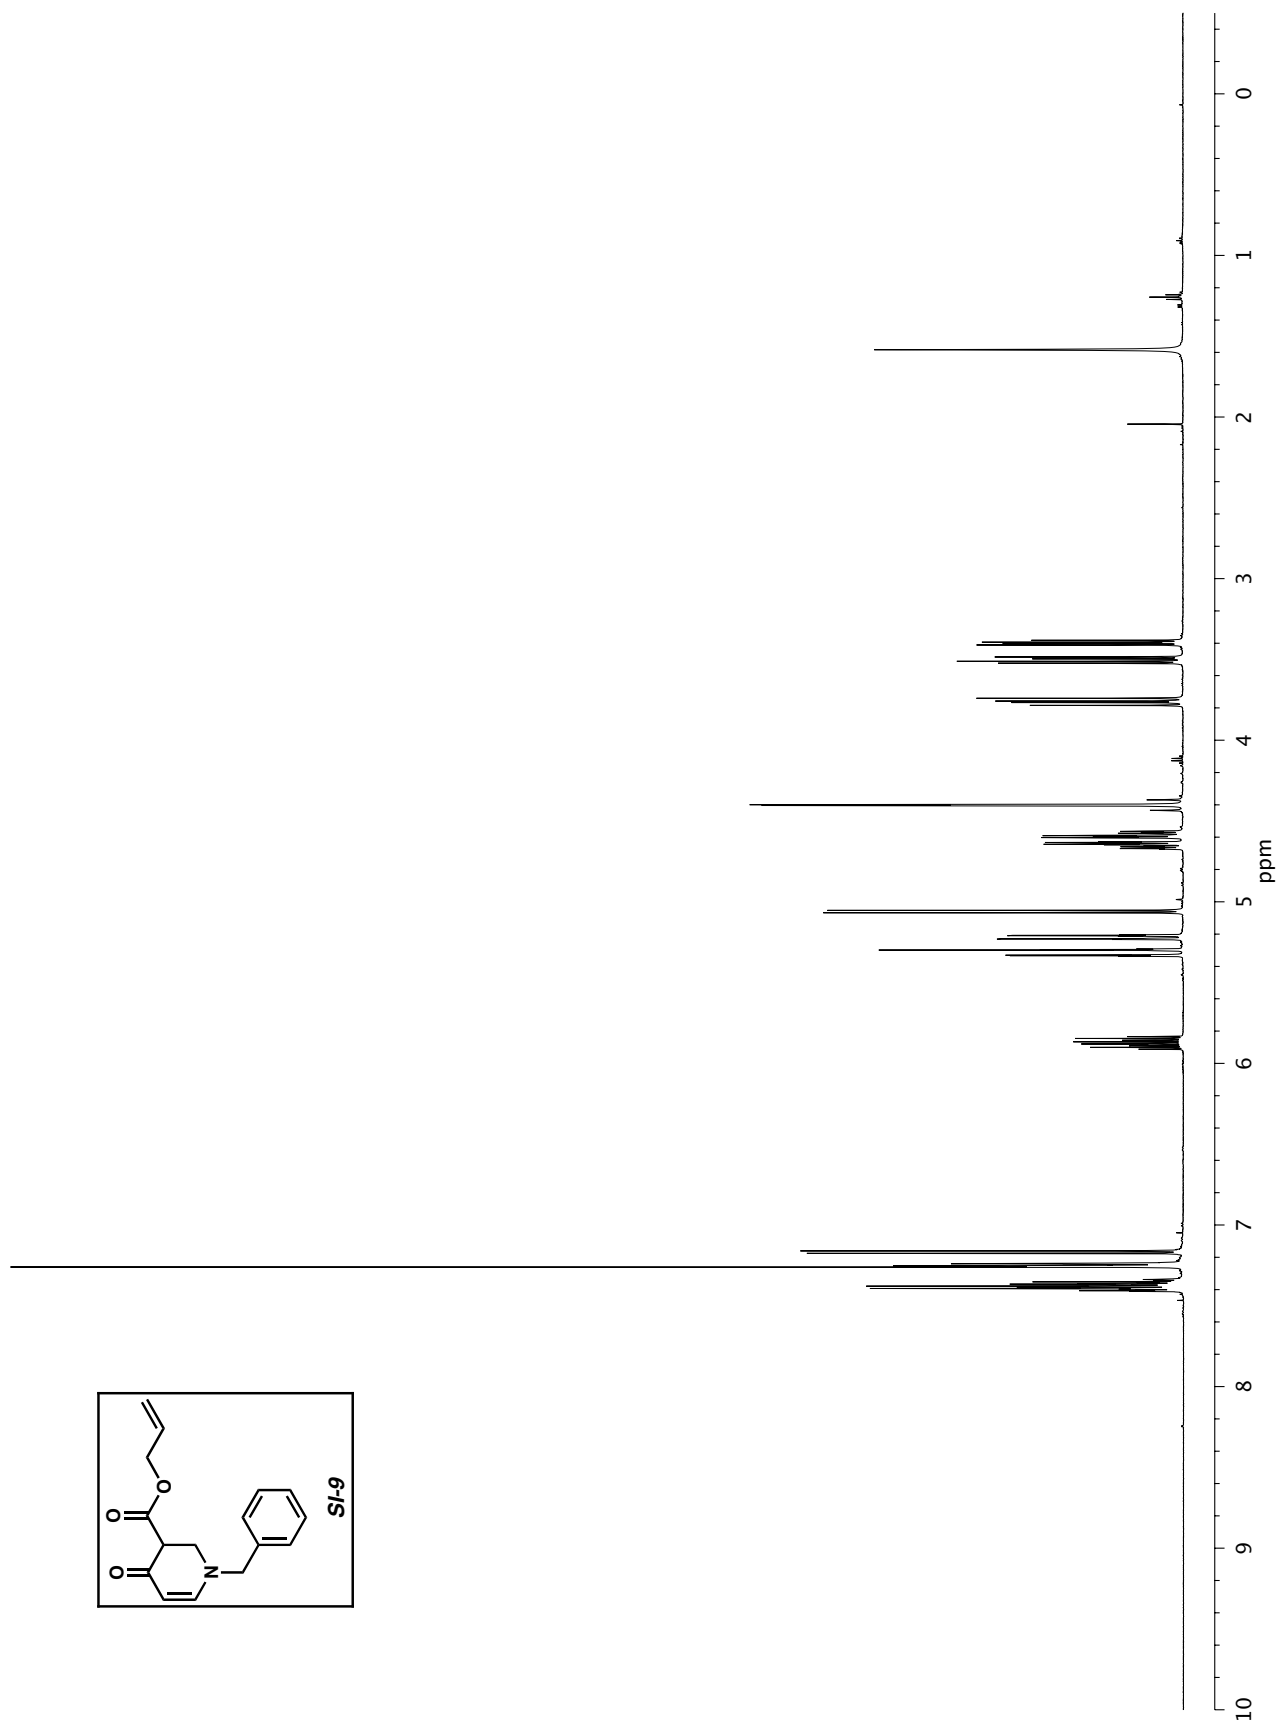Figure SI-19A.  $^1\text{H NMR}$  (500 MHz,  $\text{CDCl}_3$ ) of compound SI-9.

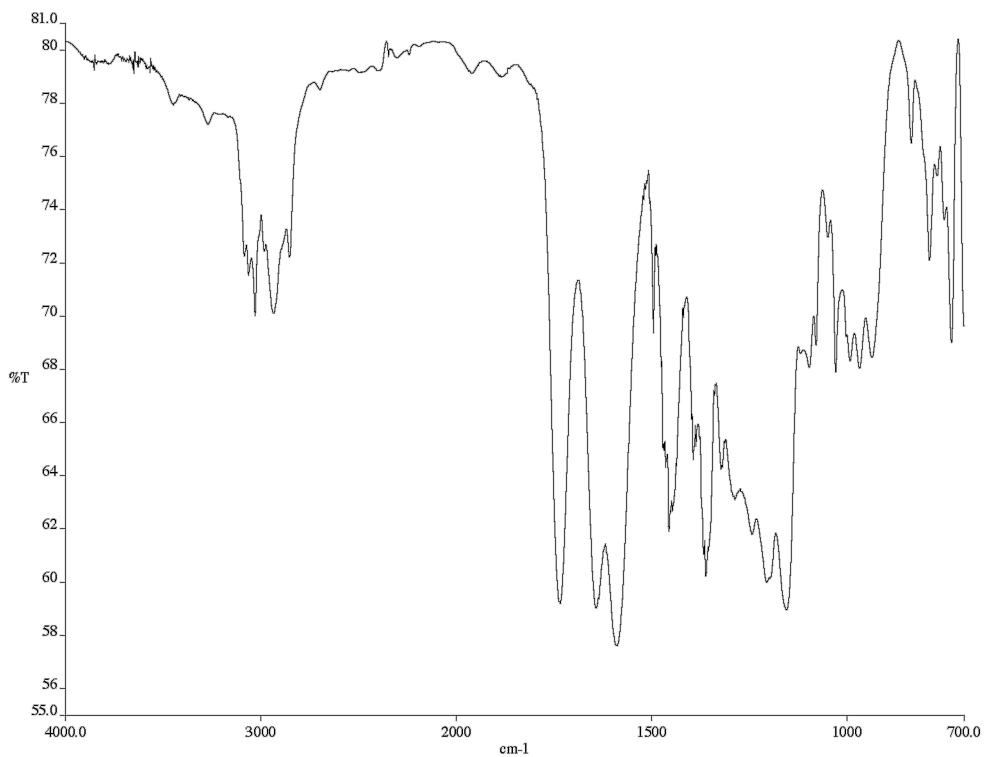

Figure SI-19B. Infrared spectrum (thin film/NaCl) of compound **SI-9**.

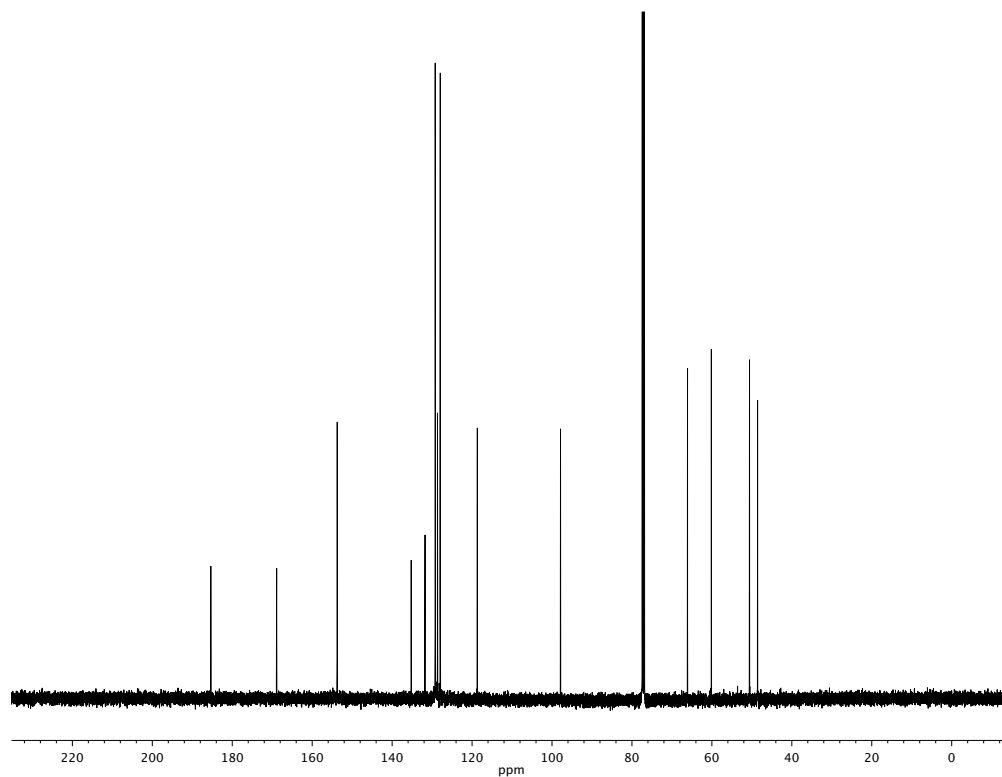

Figure SI-19C.  $^{13}\text{C}$  NMR (125 MHz,  $\text{CDCl}_3$ ) of compound **SI-9**.

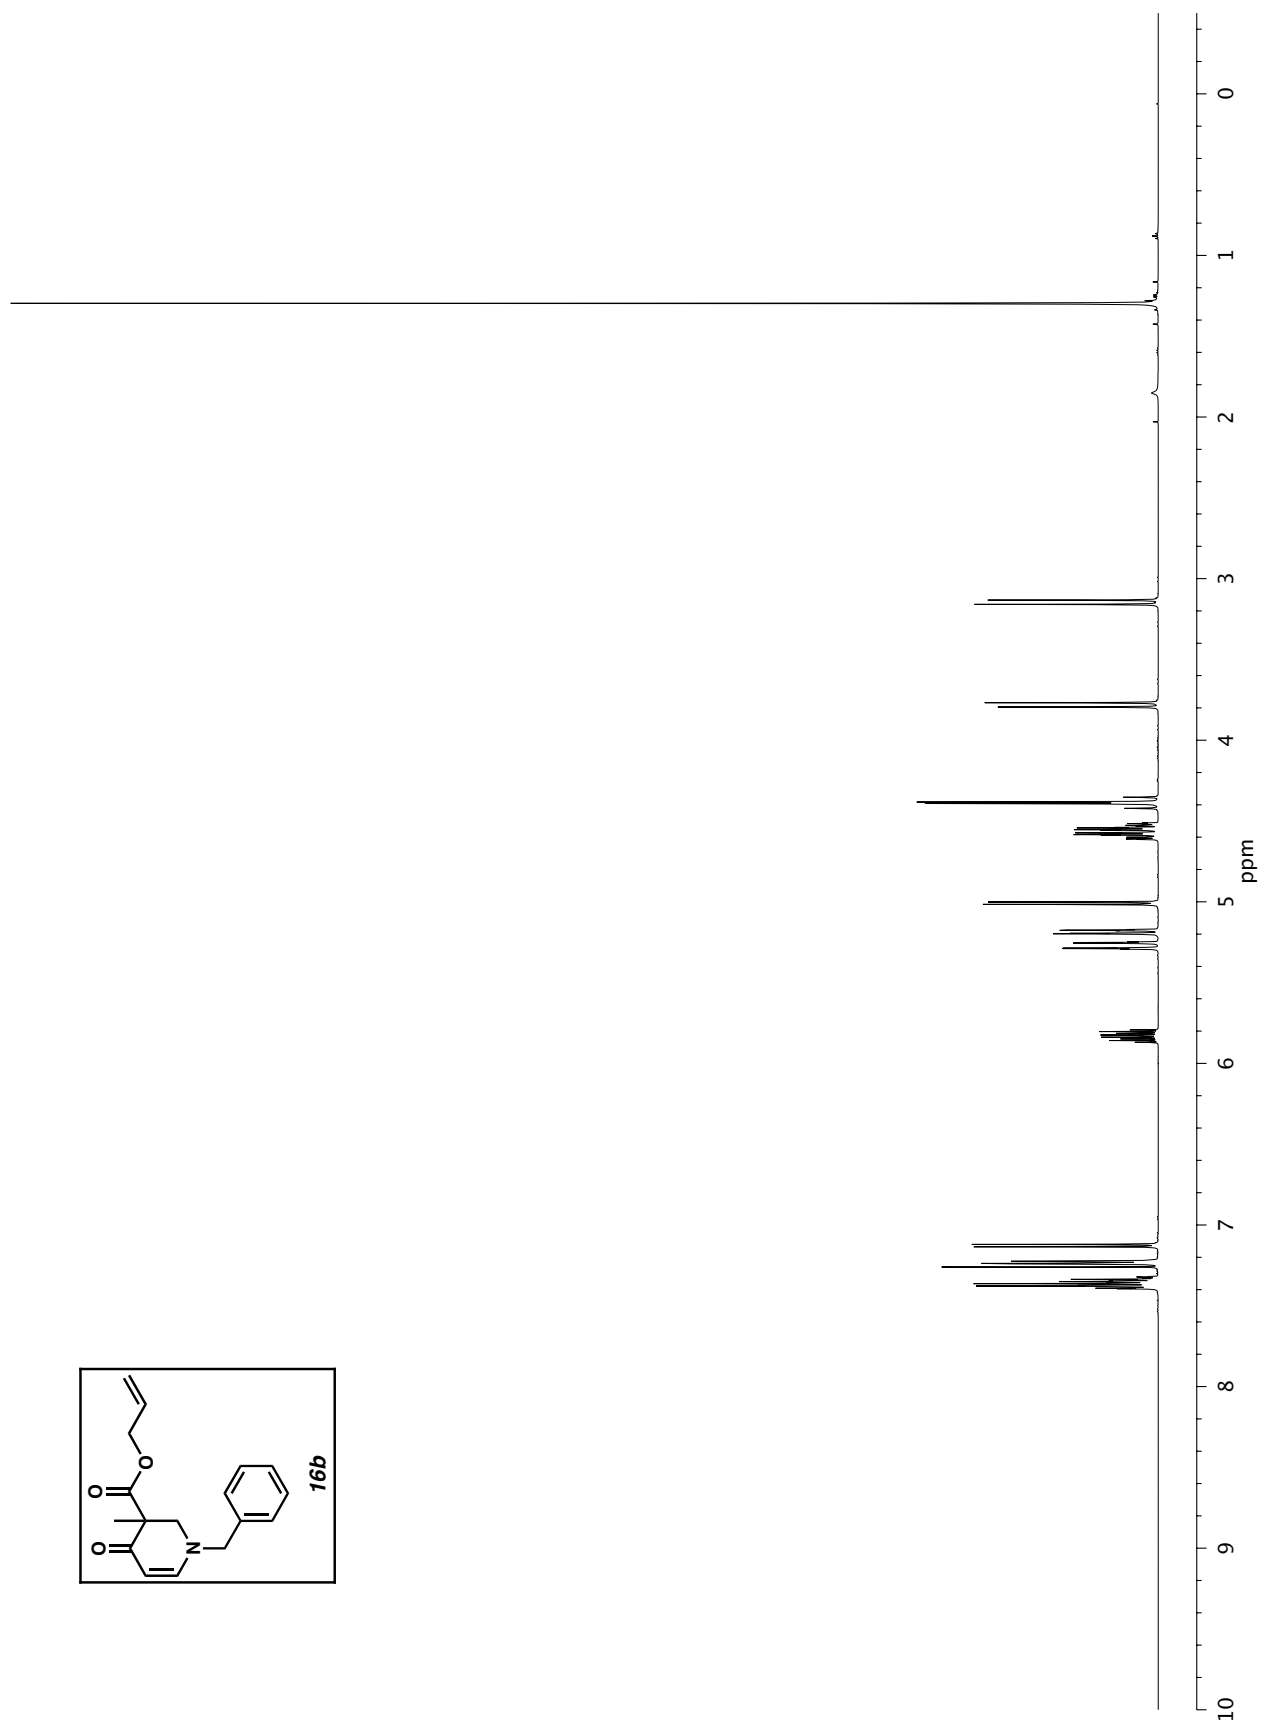

Figure SI-20A. <sup>1</sup>H NMR (500 MHz, CDCl<sub>3</sub>) of compound **16b**.

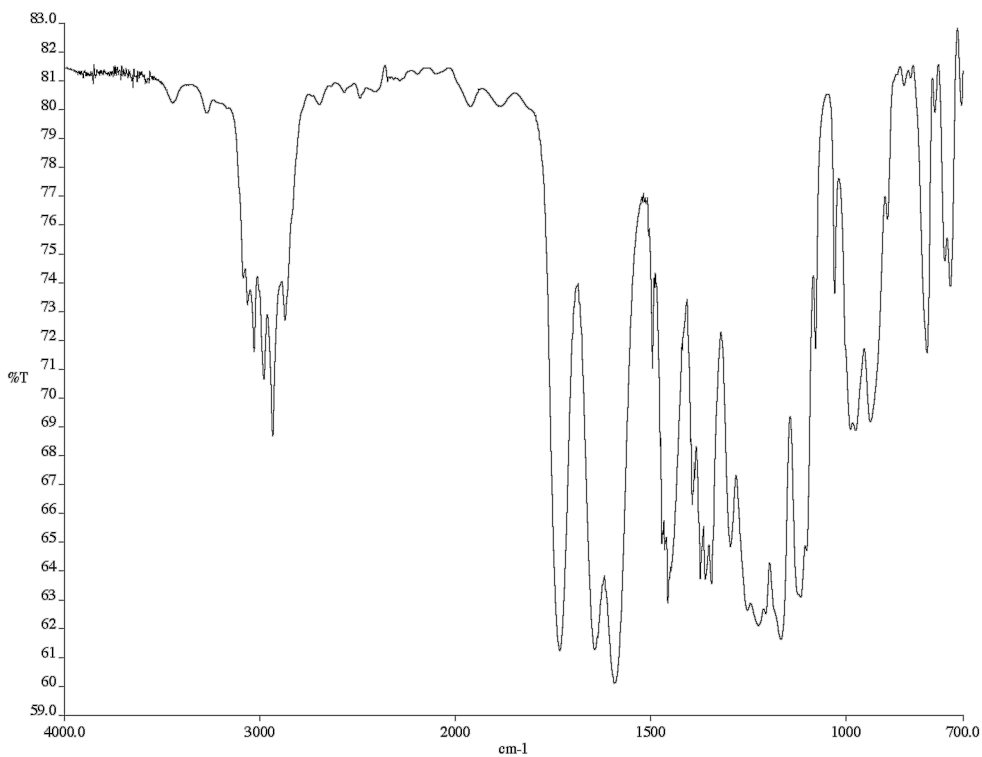

Figure SI-20B. Infrared spectrum (thin film/NaCl) of compound **16b**.

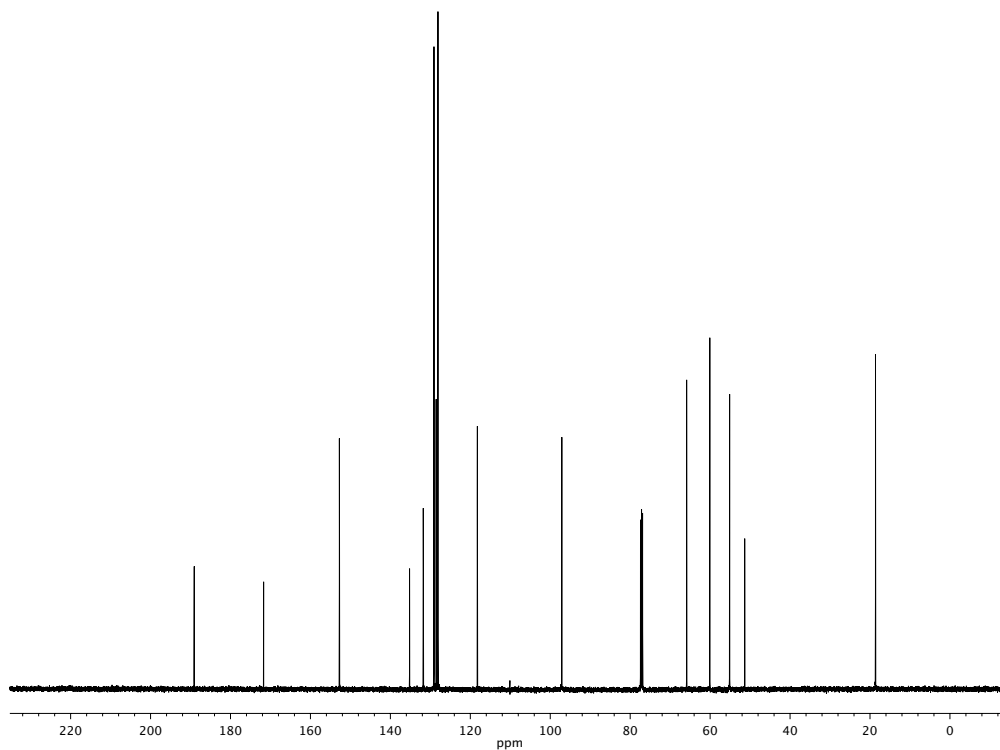

Figure SI-20C. <sup>13</sup>C NMR (125 MHz, CDCl<sub>3</sub>) of compound **16b**.

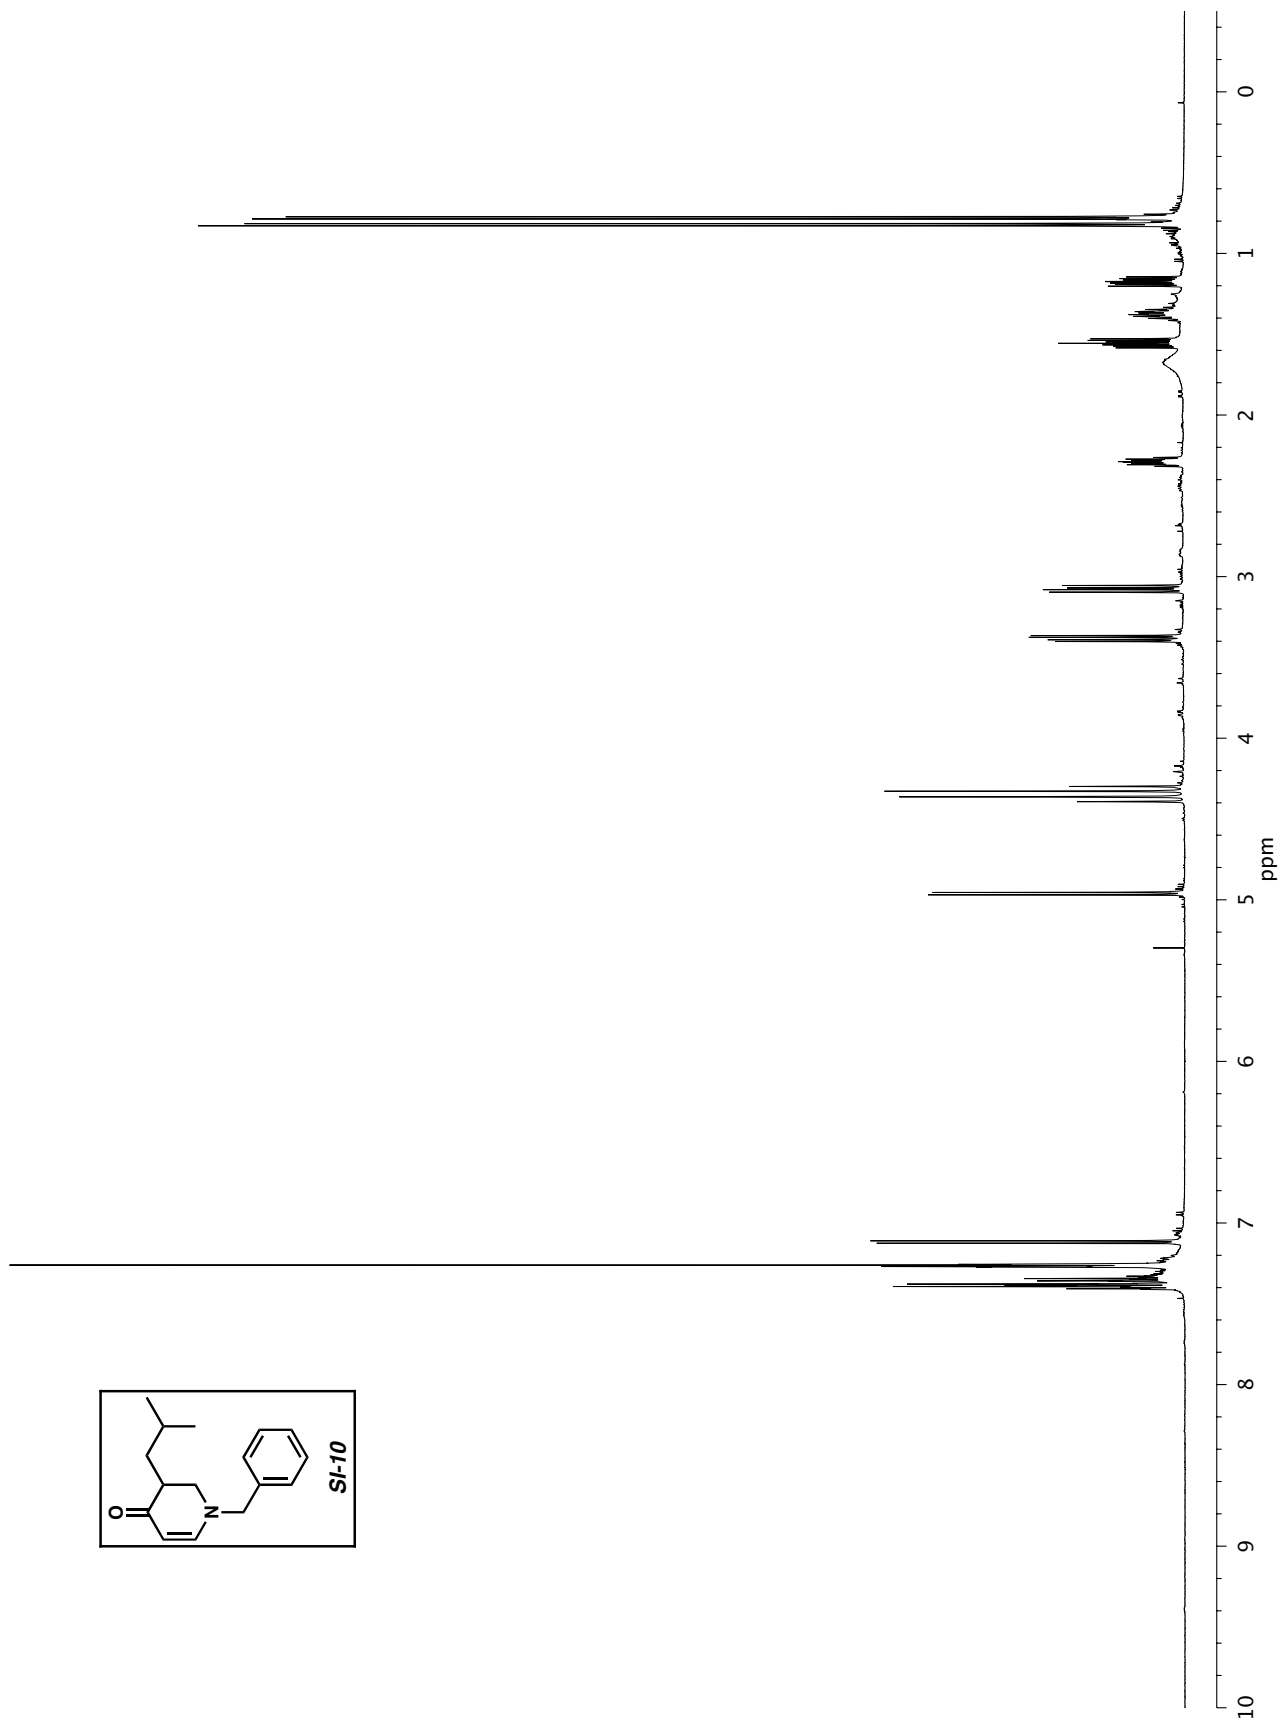

Figure SI-21A.  $^1\text{H}$  NMR (500 MHz,  $\text{CDCl}_3$ ) of compound SI-10.



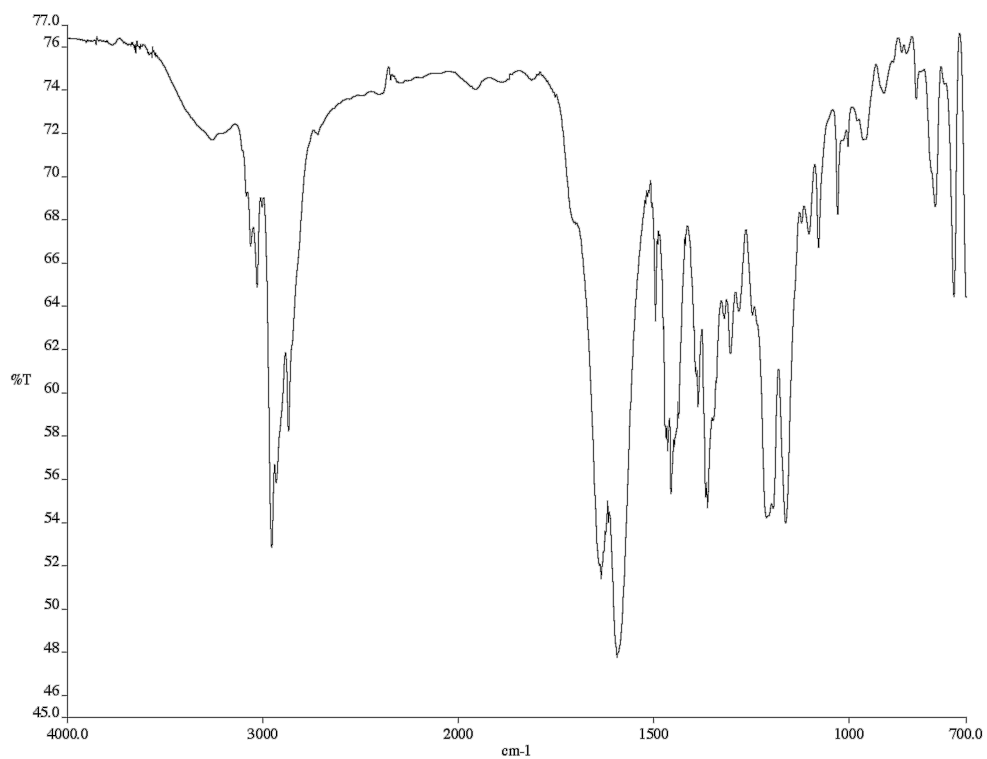

Figure SI-21B. Infrared spectrum (thin film/NaCl) of compound **SI-10**.

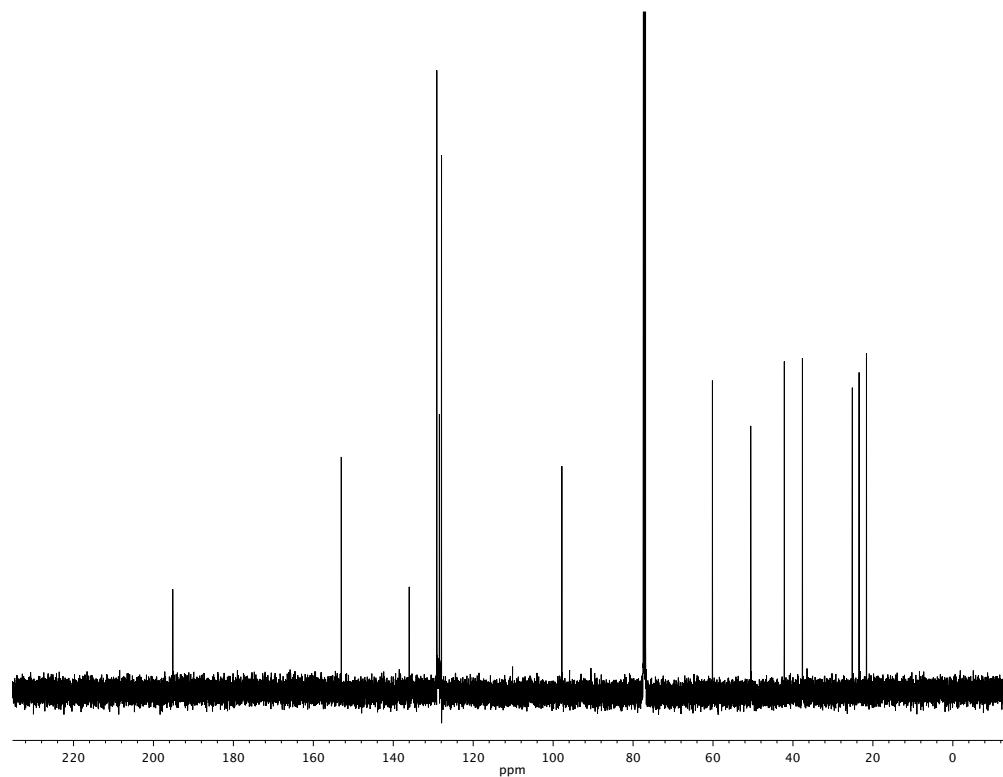

Figure SI-21C. <sup>13</sup>C NMR (125 MHz, CDCl<sub>3</sub>) of compound **SI-10**.

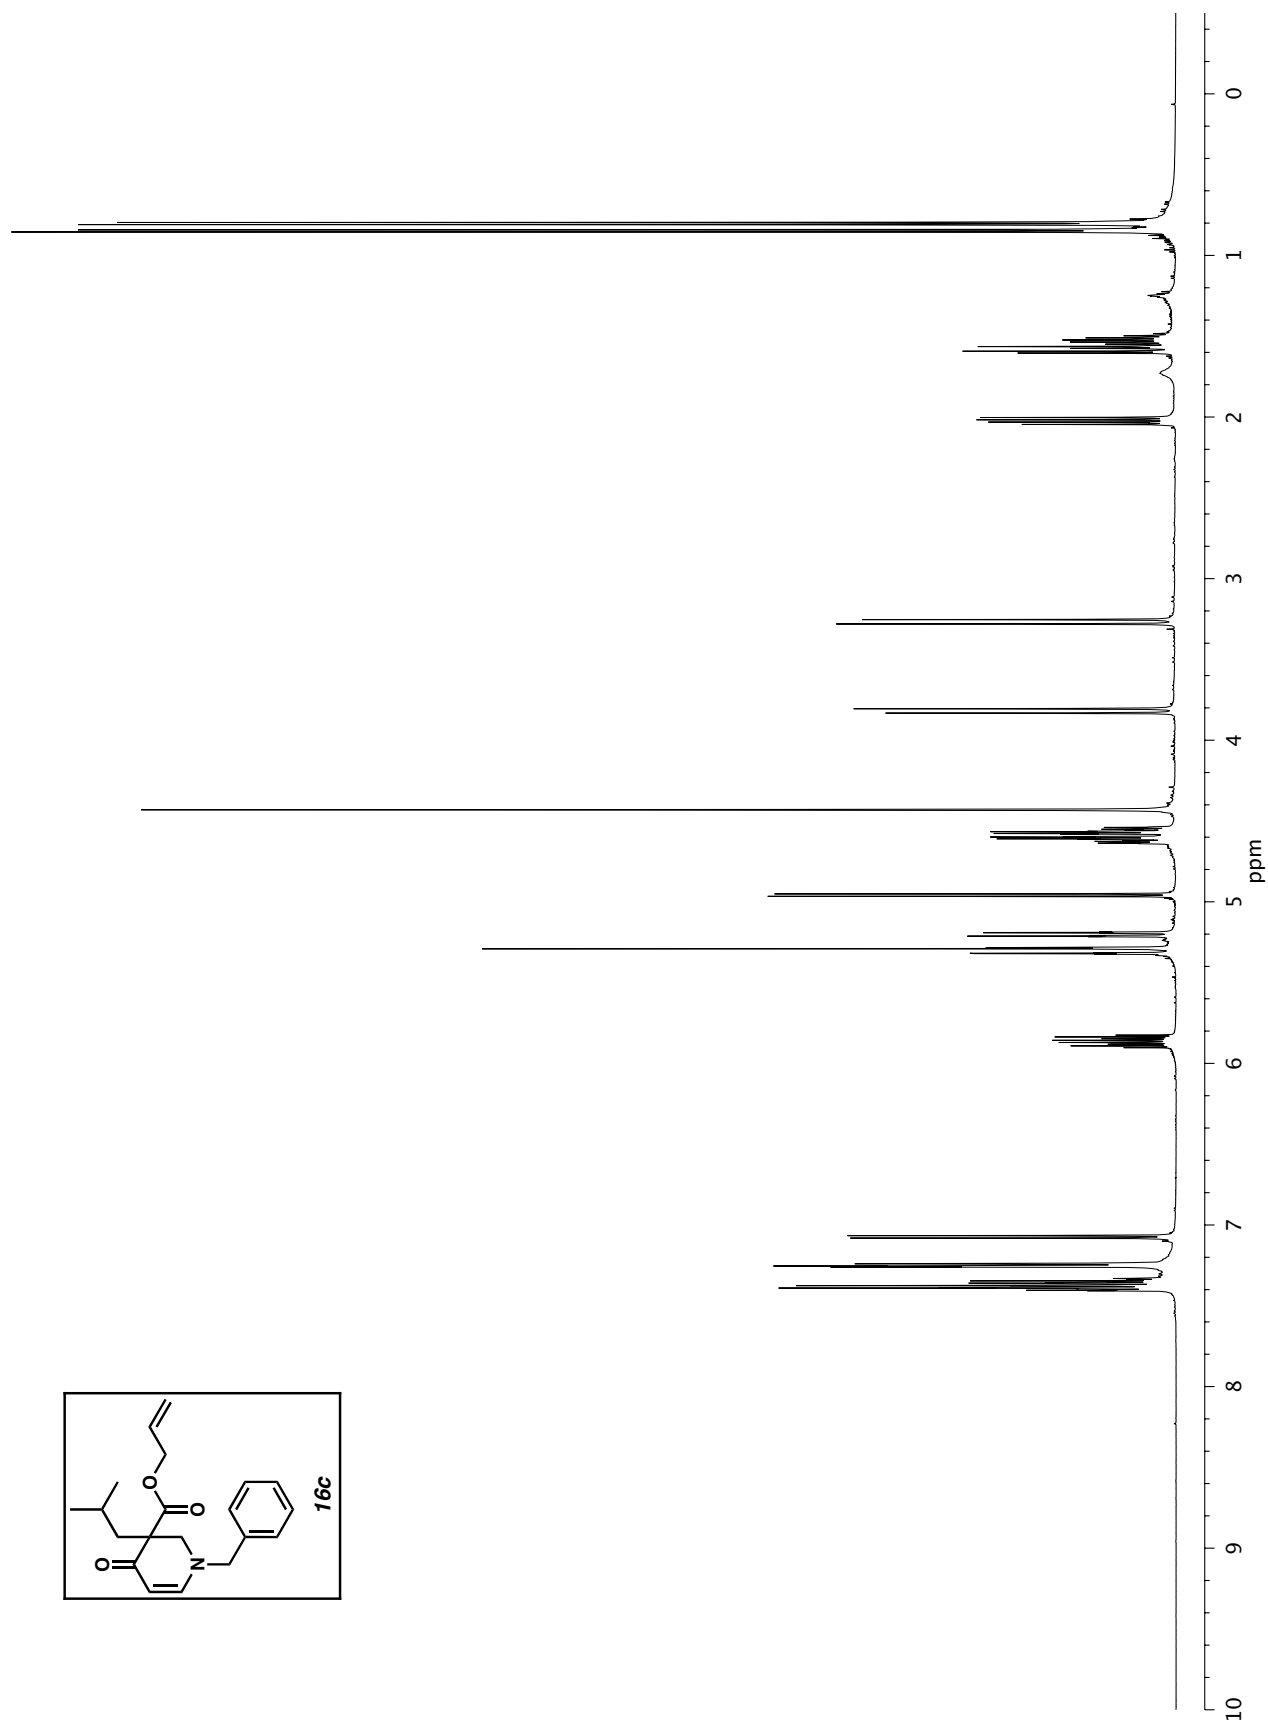

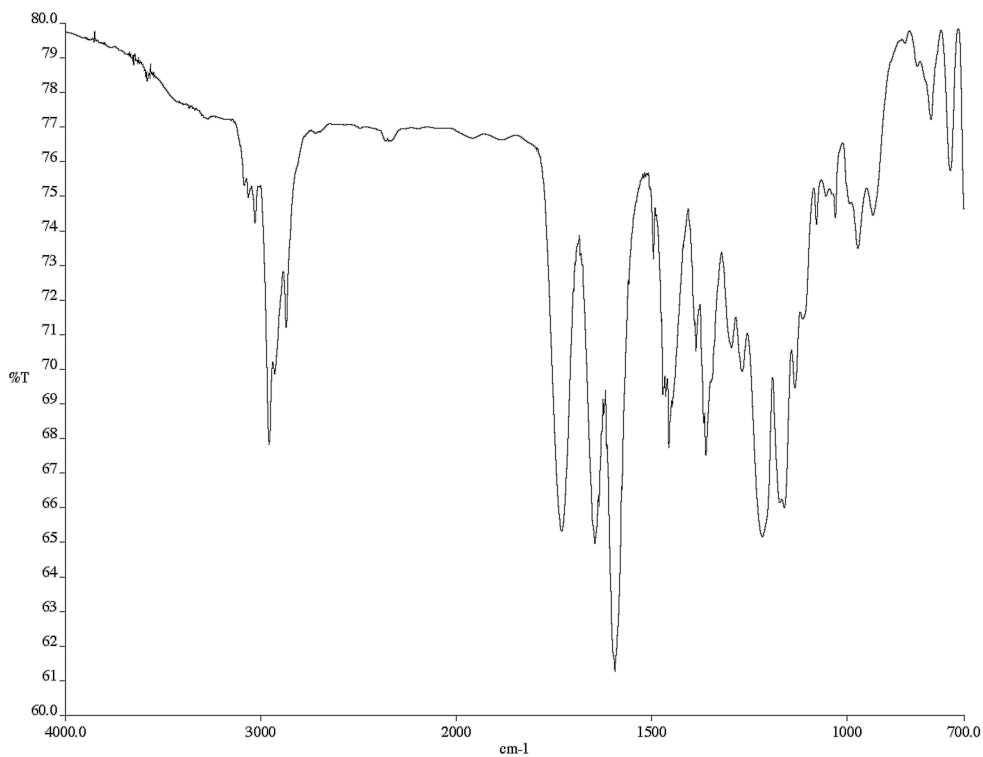

Figure SI-22B. Infrared spectrum (thin film/NaCl) of compound **16c**.

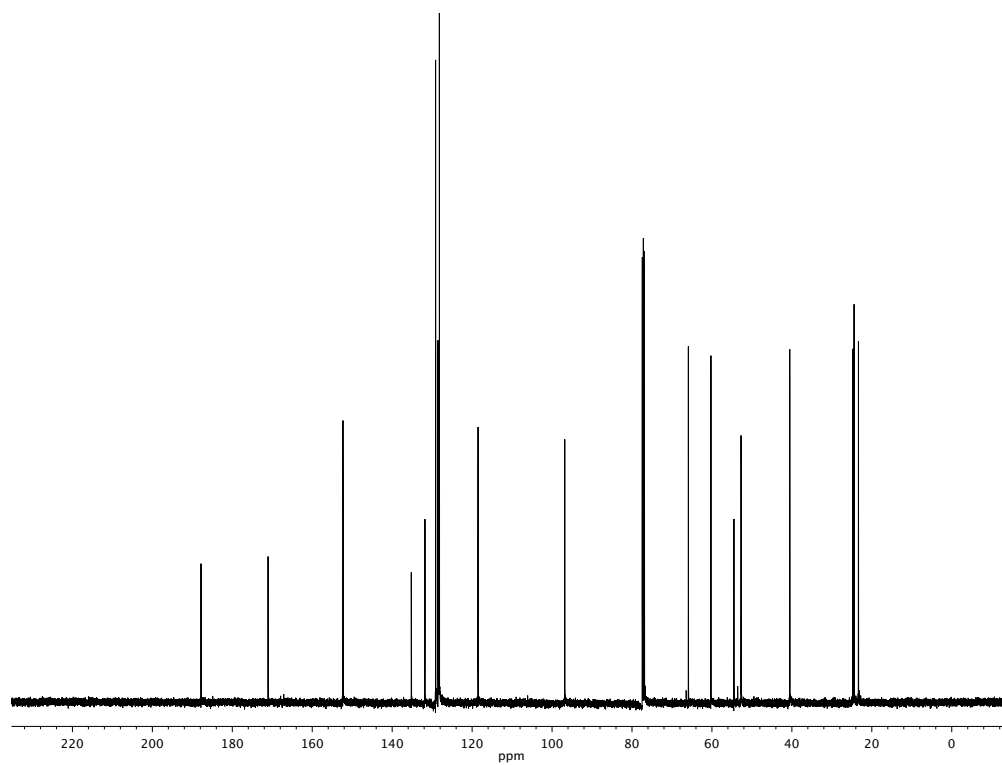

Figure SI-22C. <sup>13</sup>C NMR (125 MHz, CDCl<sub>3</sub>) of compound **16c**.

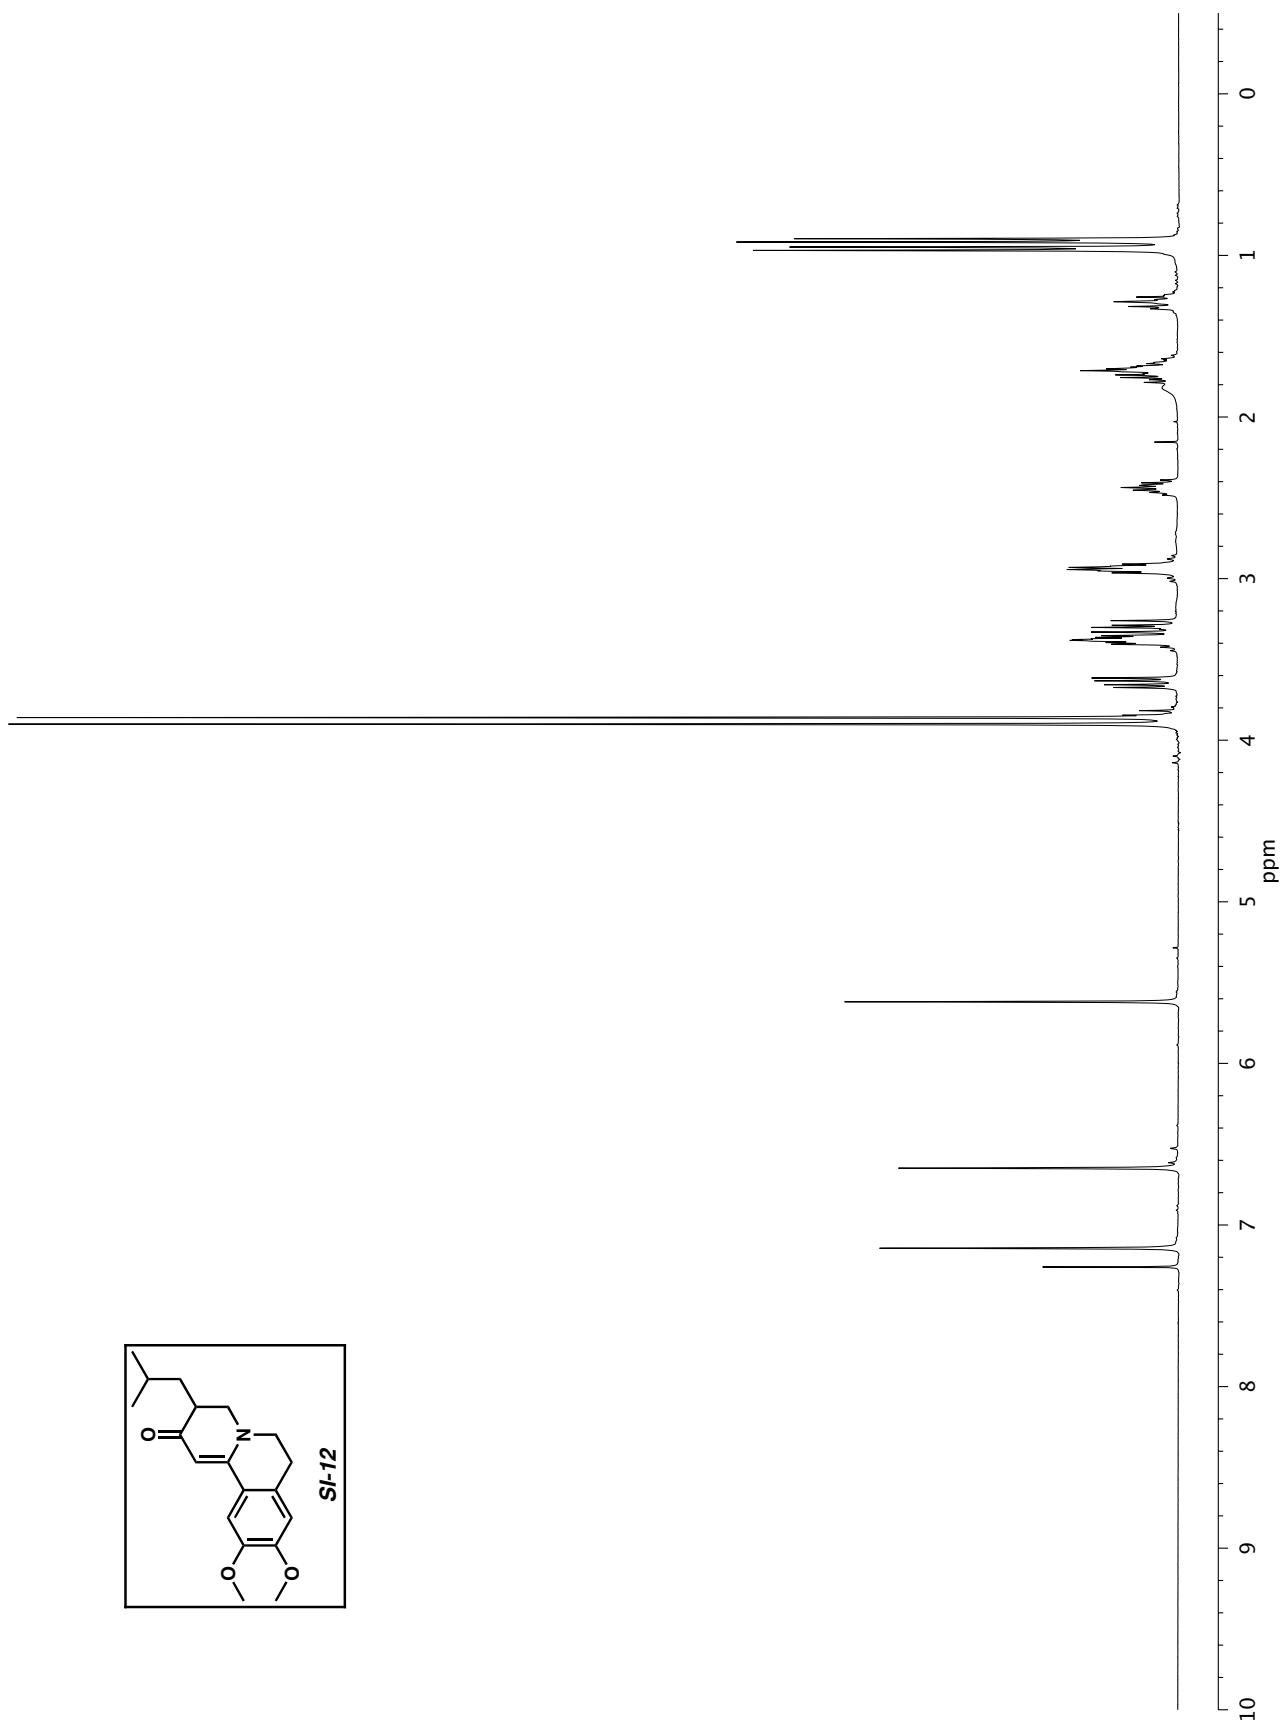

Figure SI-23A.  $^1\text{H}$  NMR (500 MHz,  $\text{CDCl}_3$ ) of compound SI-12.

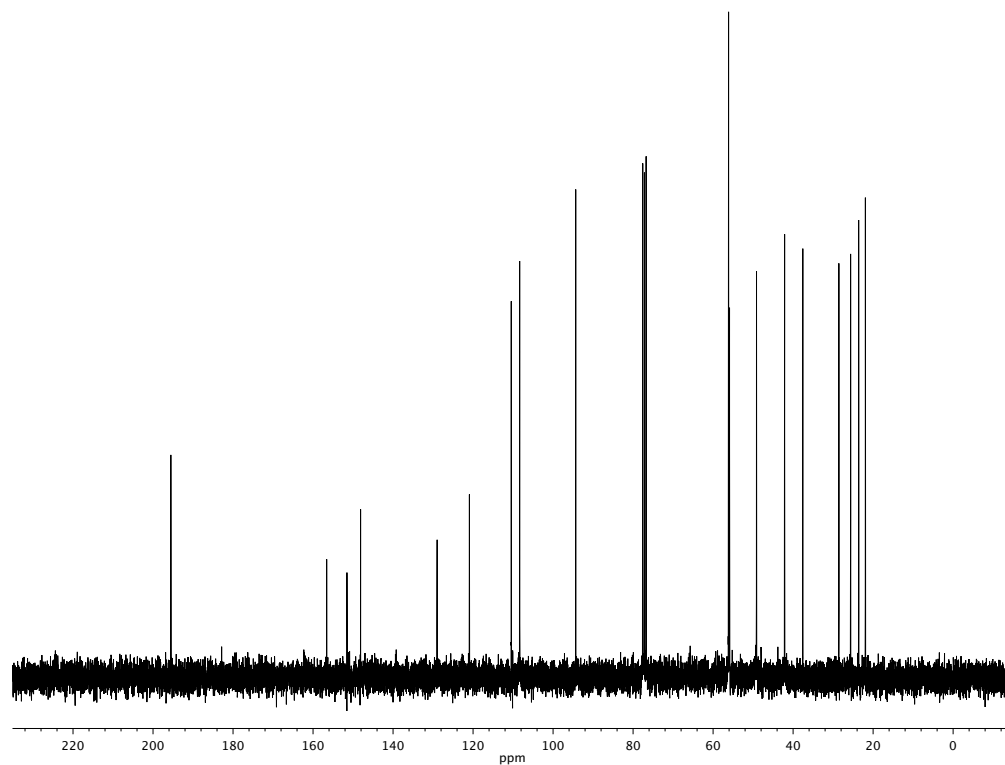

Figure SI-23B.  $^{13}\text{C}$  NMR (125 MHz,  $\text{CDCl}_3$ ) of compound SI-12.

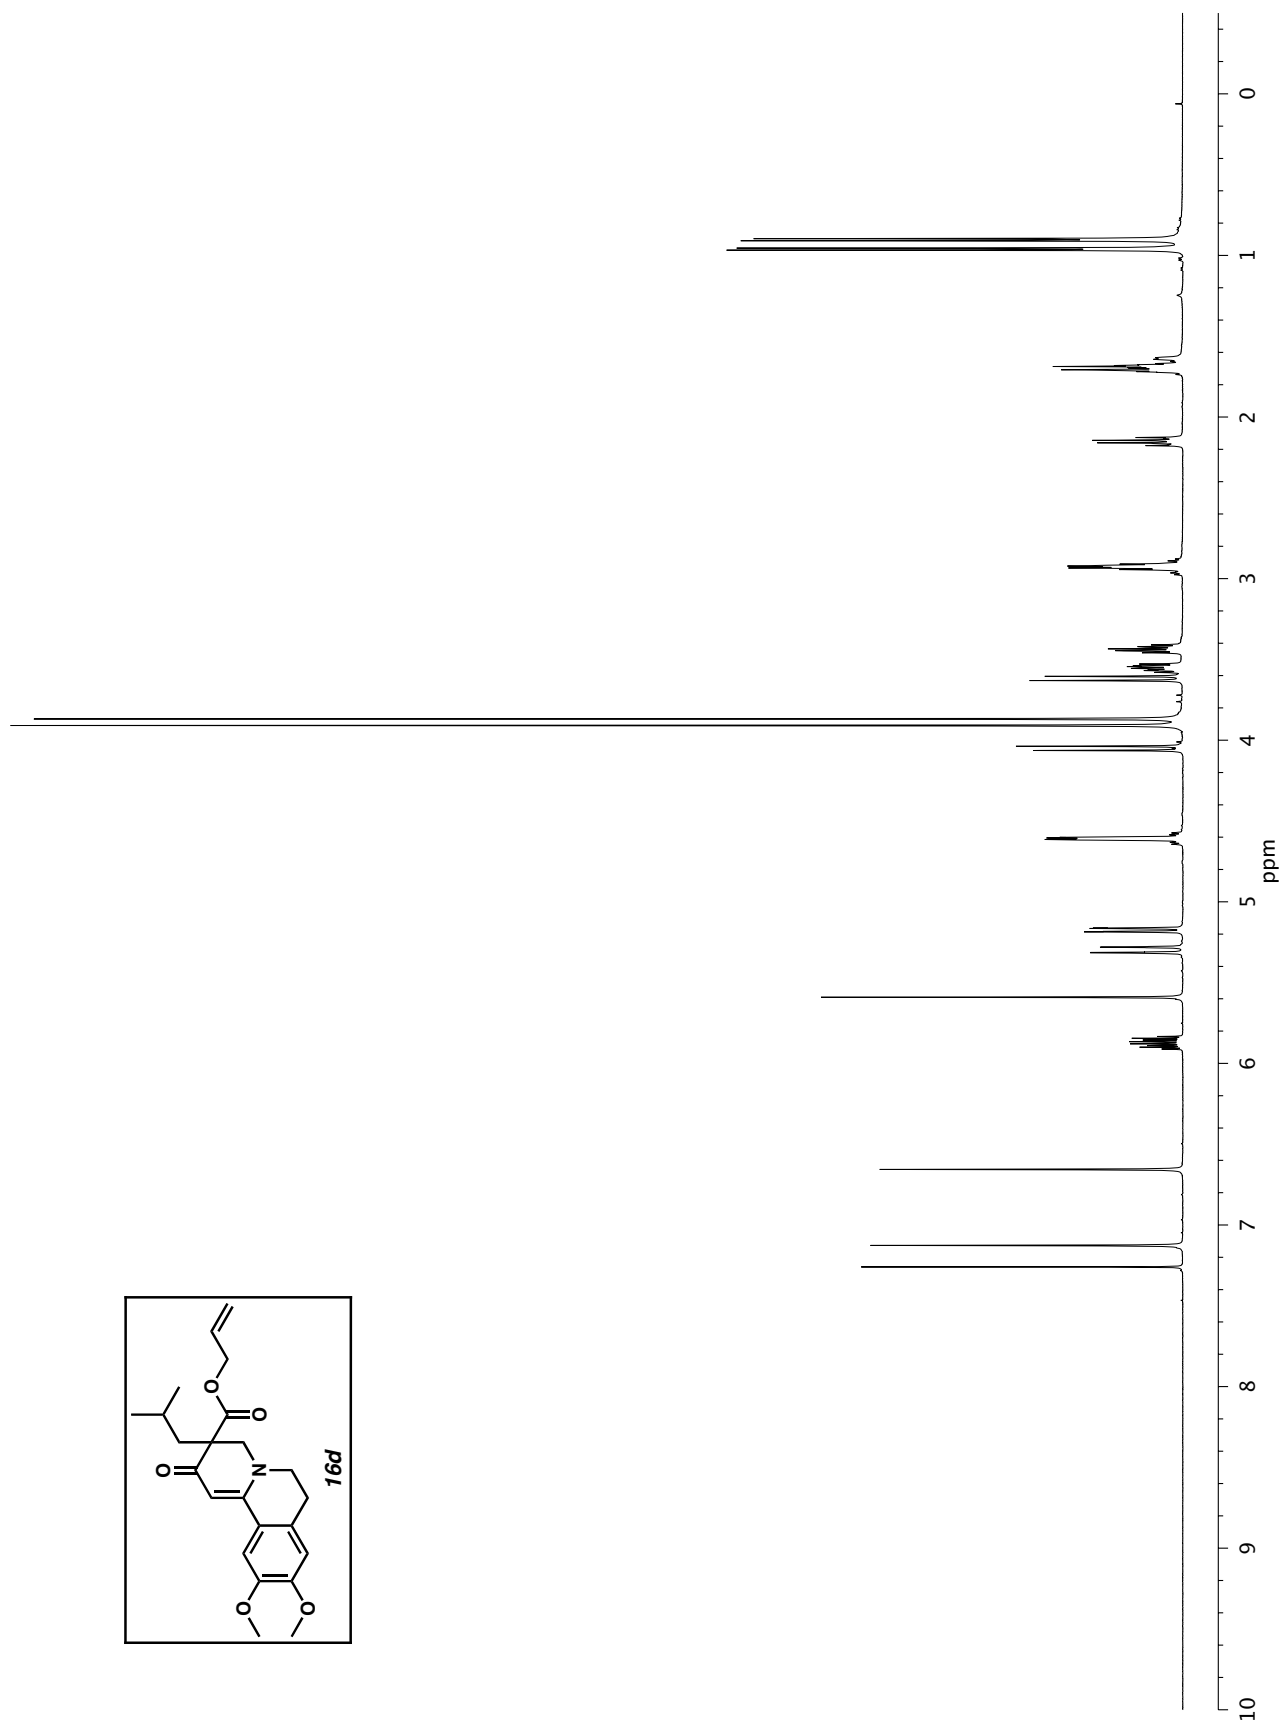Figure SI-244.  $^1\text{H}$  NMR (500 MHz,  $\text{CDCl}_3$ ) of compound **16d**.

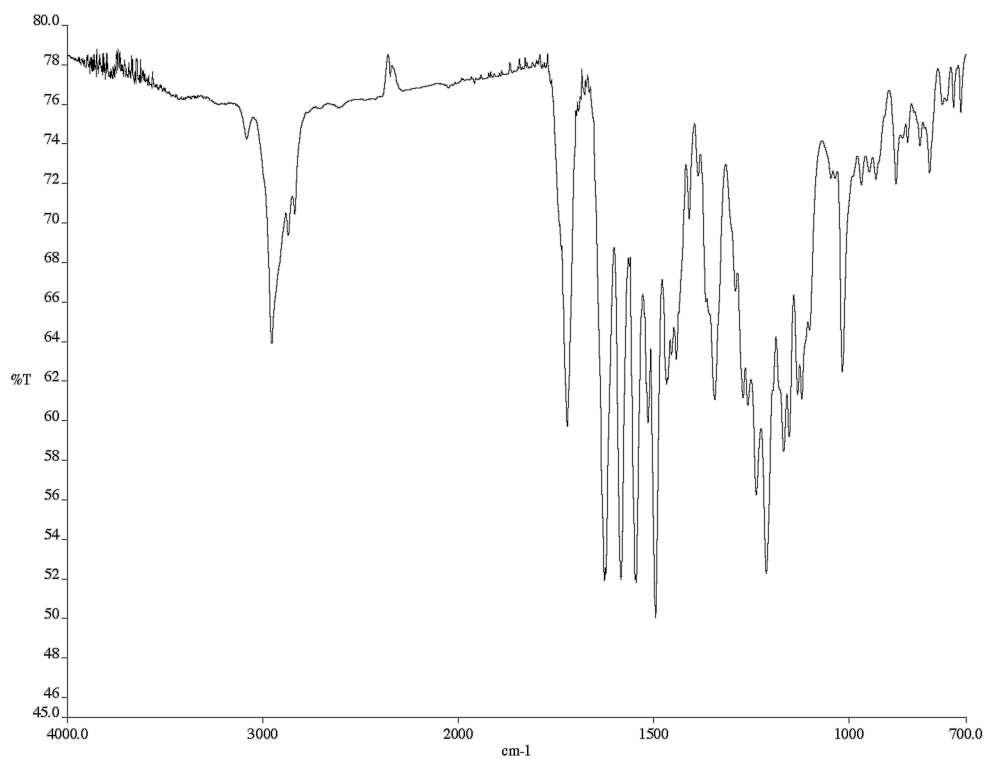

Figure SI-24B. Infrared spectrum (thin film/NaCl) of compound **16d**.

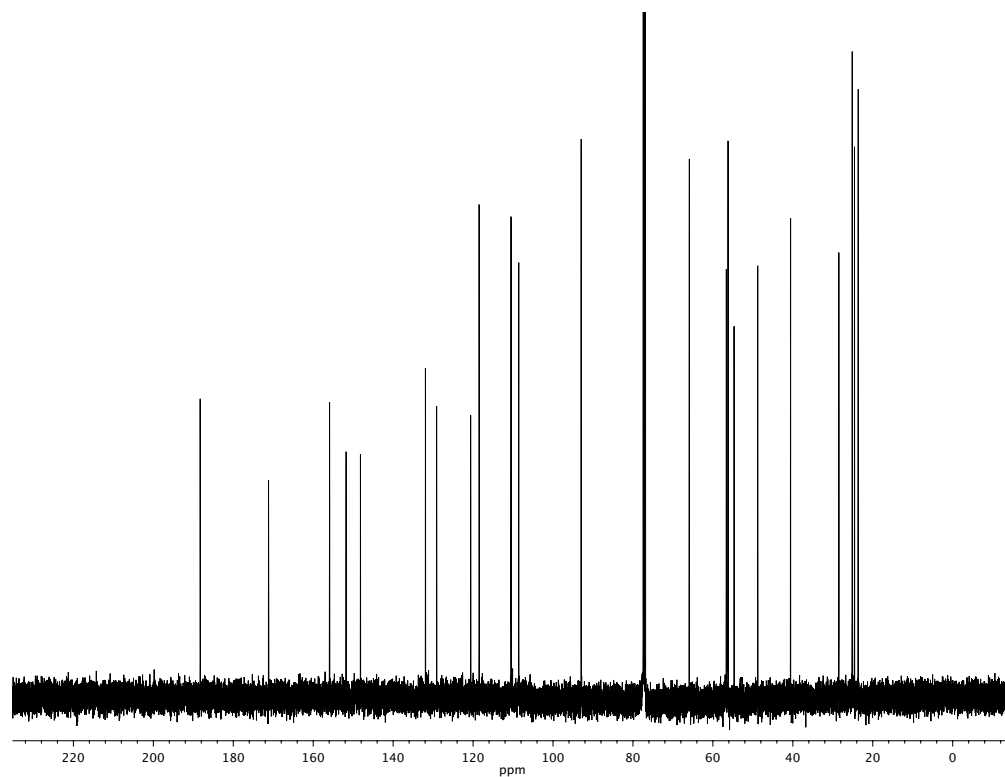

Figure SI-24C. <sup>13</sup>C NMR (125 MHz, CDCl<sub>3</sub>) of compound **16d**.

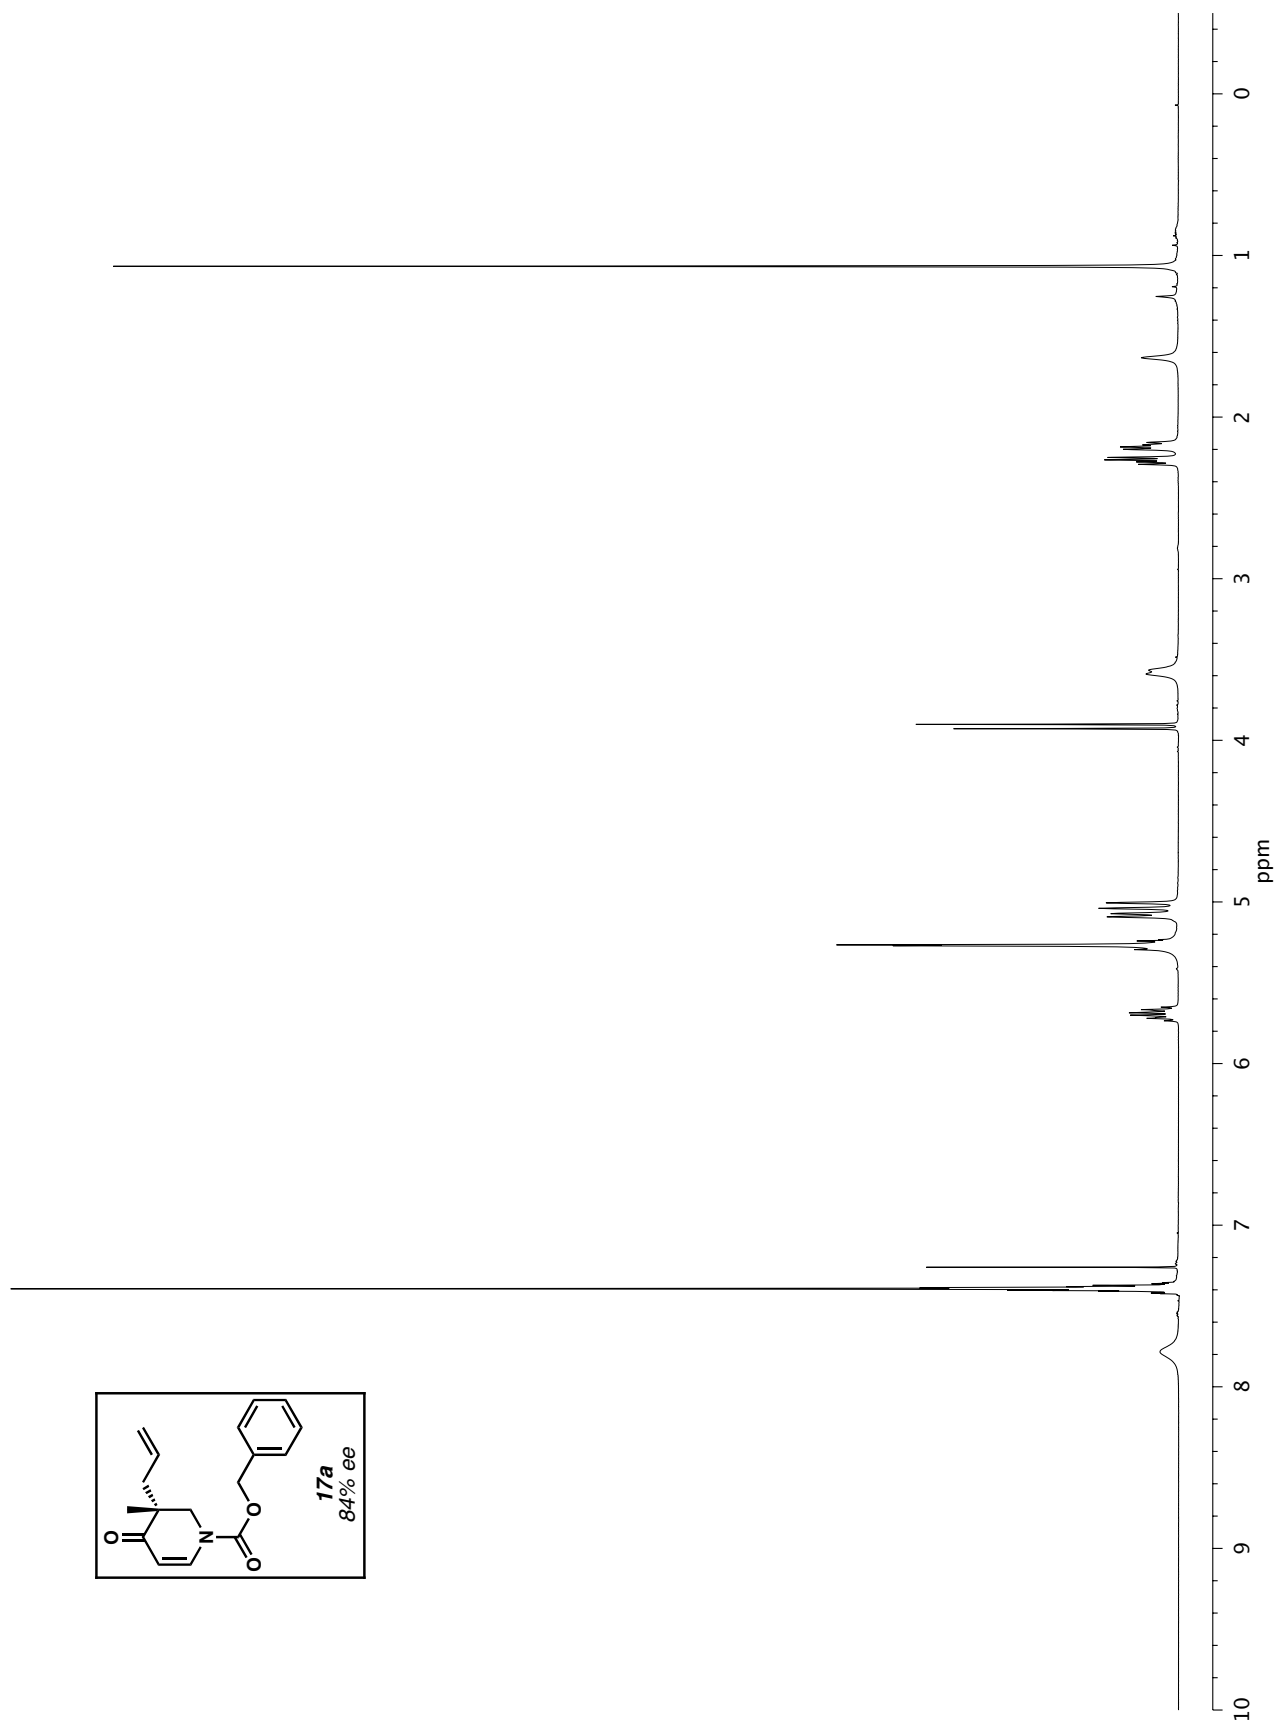Figure SI-25A. <sup>1</sup>H NMR (500 MHz, CDCl<sub>3</sub>) of compound **17a**.



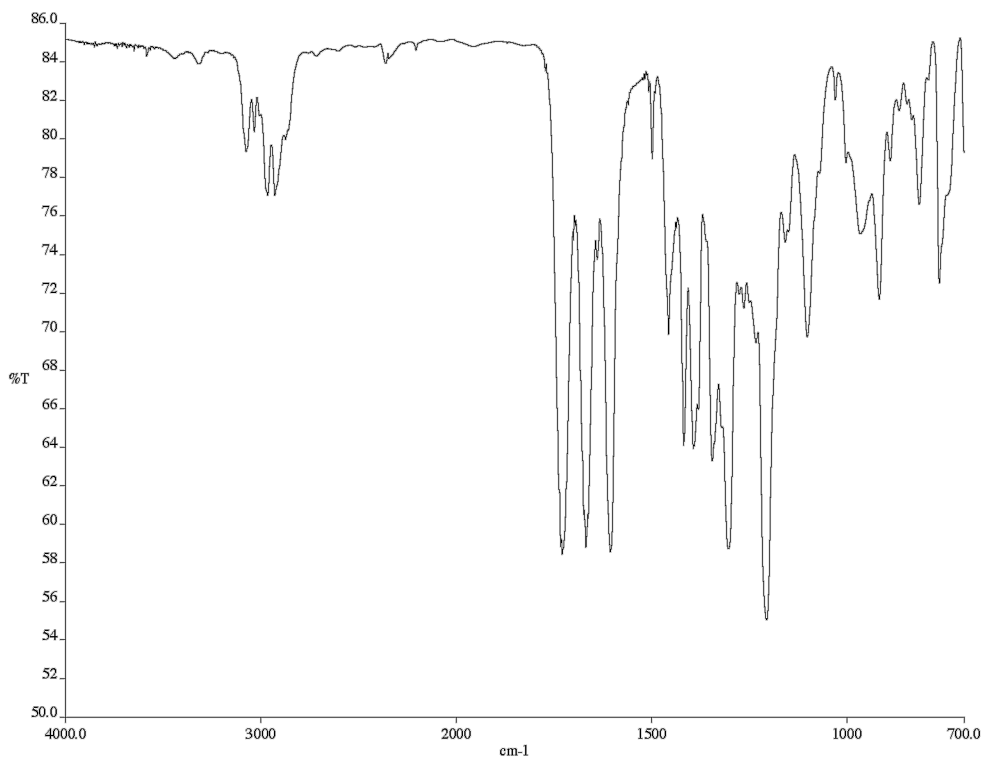

Figure SI-25B. Infrared spectrum (thin film/NaCl) of compound **17a**.

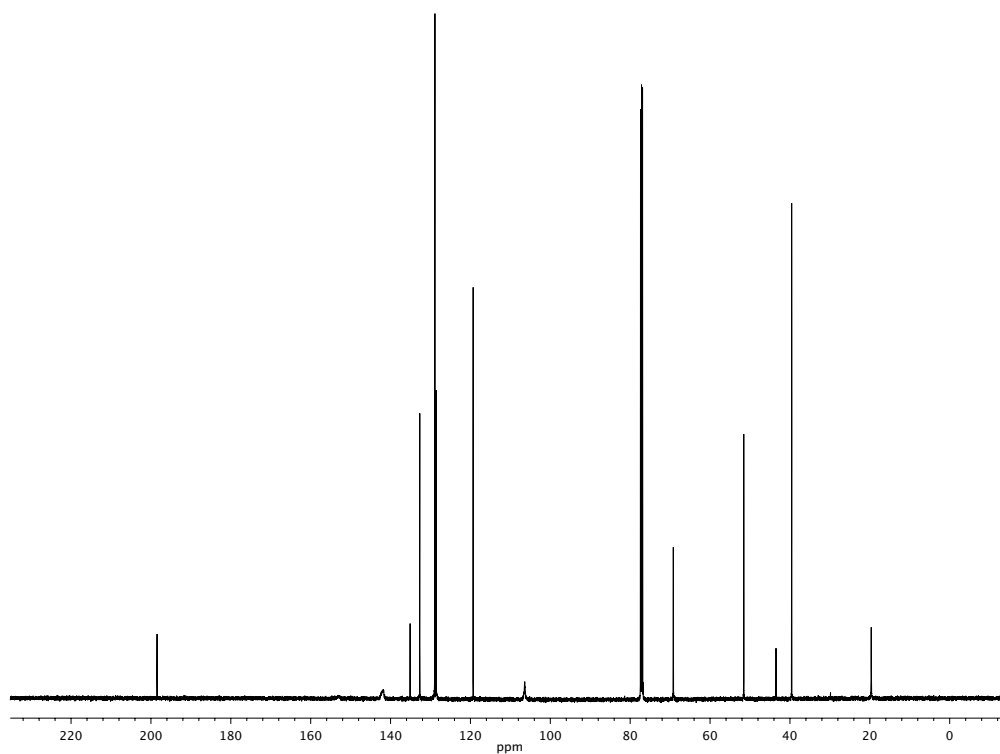

Figure SI-25C.  $^{13}\text{C}$  NMR (125 MHz,  $\text{CDCl}_3$ ) of compound **17a**.

Data File C:\CHEM32\...\ANM\AM\_109\_110\_111\_19\_09\_2012 2012-09-18 12-35-04\AM-I-109\_RAC\_1.D  
Sample Name: AM-i-109\_rac\_1

=====

|                 |                                                                                                                 |            |           |
|-----------------|-----------------------------------------------------------------------------------------------------------------|------------|-----------|
| Acq. Operator   | : ANM                                                                                                           | Seq. Line  | : 2       |
| Acq. Instrument | : Instrument 1                                                                                                  | Location   | : P4-F-01 |
| Injection Date  | : 9/18/2012 12:40:04 PM                                                                                         | Inj        | : 1       |
|                 |                                                                                                                 | Inj Volume | : 5 µl    |
| Acq. Method     | : C:\Chem32\1\DATA\ANM\AM_109_110_111_19_09_2012 2012-09-18 12-35-04\S1C2<br>12MIN 5.M                          |            |           |
| Last changed    | : 5/19/2011 9:00:59 PM by DCB                                                                                   |            |           |
| Analysis Method | : C:\CHEM32\1\DATA\ANM\AM_109_110_111_19_09_2012 2012-09-18 12-35-04\AM-I-<br>109_RAC_1.D\DA.M (S1C2 12MIN 5.M) |            |           |
| Last changed    | : 5/19/2011 9:00:59 PM by DCB                                                                                   |            |           |
| Method Info     | : S1C2 12min 5.M: 5% MeOH, AD-H 3 mL/min, 12 min                                                                |            |           |

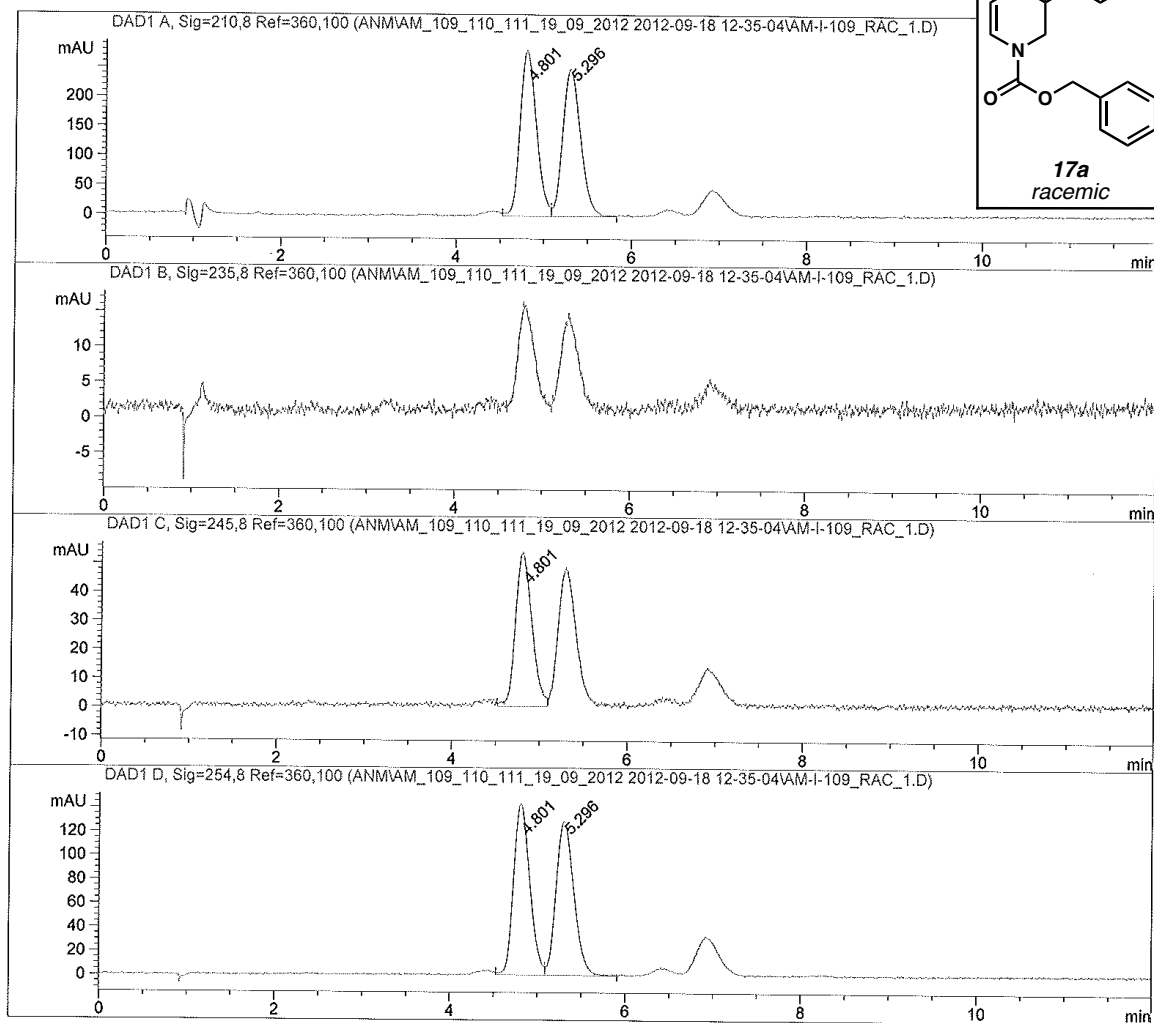

Figure SI-25D. Chiral SFC data of racemic compound **17a**.

Data File C:\CHEM32\...\ANM\AM\_109\_110\_111\_19\_09\_2012 2012-09-18 12-35-04\AM-I-109\_RAC\_1.D  
 Sample Name: AM-i-109\_rac\_1

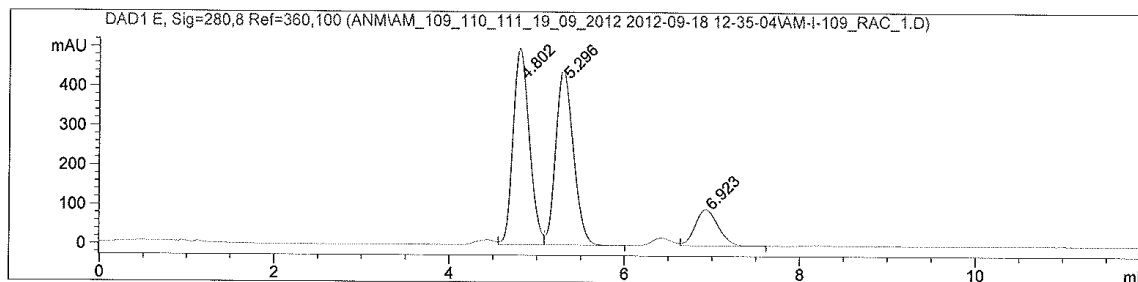

=====  
 Area Percent Report  
 =====

Sorted By : Signal  
 Multiplier : 1.0000  
 Dilution : 1.0000  
 Sample Amount : 5.00000 [ng/ul] (not used in calc.)  
 Use Multiplier & Dilution Factor with ISTDs

Signal 1: DAD1 A, Sig=210,8 Ref=360,100

| Peak # | RetTime [min] | Type | Width [min] | Area [mAU*s] | Height [mAU] | Area %  |
|--------|---------------|------|-------------|--------------|--------------|---------|
| 1      | 4.801         | VV   | 0.2045      | 3664.44873   | 280.39090    | 50.7811 |
| 2      | 5.296         | VV   | 0.2183      | 3551.72461   | 249.17192    | 49.2189 |

Totals : 7216.17334 529.56282

Signal 2: DAD1 B, Sig=235,8 Ref=360,100

Signal 3: DAD1 C, Sig=245,8 Ref=360,100

| Peak # | RetTime [min] | Type | Width [min] | Area [mAU*s] | Height [mAU] | Area %   |
|--------|---------------|------|-------------|--------------|--------------|----------|
| 1      | 4.801         | VV   | 0.2018      | 702.84430    | 53.31551     | 100.0000 |

Totals : 702.84430 53.31551

Signal 4: DAD1 D, Sig=254,8 Ref=360,100

| Peak # | RetTime [min] | Type | Width [min] | Area [mAU*s] | Height [mAU] | Area %  |
|--------|---------------|------|-------------|--------------|--------------|---------|
| 1      | 4.801         | VV   | 0.2038      | 1863.76855   | 143.27269    | 50.4753 |
| 2      | 5.296         | VB   | 0.2218      | 1828.66467   | 128.65884    | 49.5247 |

Totals : 3692.43323 271.93153

Data File C:\CHEM32\...\ANM\AM\_109\_110\_111\_19\_09\_2012 2012-09-18 12-35-04\AM-I-109\_RAC\_1.D  
Sample Name: AM-i-109\_rac\_1

Signal 5: DAD1 E, Sig=280,8 Ref=360,100

| Peak # | RetTime [min] | Type | Width [min] | Area [mAU*s] | Height [mAU] | Area %  |
|--------|---------------|------|-------------|--------------|--------------|---------|
| 1      | 4.802         | VV   | 0.2032      | 6442.83447   | 496.96964    | 44.6444 |
| 2      | 5.296         | VB   | 0.2214      | 6284.14746   | 443.22113    | 43.5448 |
| 3      | 6.923         | VB   | 0.2833      | 1704.45483   | 92.35108     | 11.8107 |

Totals : 1.44314e4 1032.54185

=====  
\*\*\* End of Report \*\*\*



Data File C:\CHEM32\...M\AM\_109\_110\_111\_17\_09\_2012 2012-09-17 18-05-21\AM-I-110\_CHIRAL\_2.D  
 Sample Name: AM-i-110\_chiral\_2

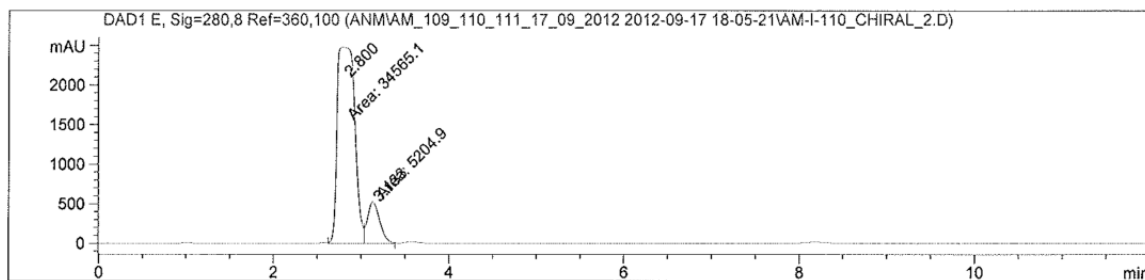

=====  
 Area Percent Report  
 =====

Sorted By : Signal  
 Multiplier : 1.0000  
 Dilution : 1.0000  
 Sample Amount : 5.00000 [ng/ul] (not used in calc.)  
 Use Multiplier & Dilution Factor with ISTDs

Signal 1: DAD1 A, Sig=210,8 Ref=360,100

| Peak # | RetTime [min] | Type | Width [min] | Area [mAU*s] | Height [mAU] | Area %  |
|--------|---------------|------|-------------|--------------|--------------|---------|
| 1      | 2.794         | MF   | 0.2034      | 2.44176e4    | 2000.59717   | 89.3508 |
| 2      | 3.132         | FM   | 0.1621      | 2910.19556   | 299.30103    | 10.6492 |

Totals : 2.73278e4 2299.89819

Signal 2: DAD1 B, Sig=235,8 Ref=360,100

Signal 3: DAD1 C, Sig=245,8 Ref=360,100

Signal 4: DAD1 D, Sig=254,8 Ref=360,100

| Peak # | RetTime [min] | Type | Width [min] | Area [mAU*s] | Height [mAU] | Area %  |
|--------|---------------|------|-------------|--------------|--------------|---------|
| 1      | 2.795         | MF   | 0.1592      | 1.51950e4    | 1591.19885   | 92.1743 |
| 2      | 3.133         | FM   | 0.1579      | 1290.07031   | 136.13354    | 7.8257  |

Totals : 1.64851e4 1727.33240

Data File C:\CHEM32\...\M\AM\_109\_110\_111\_17\_09\_2012 2012-09-17 18-05-21\AM-I-110\_CHIRAL\_2.D  
Sample Name: AM-i-110\_chiral\_2

Signal 5: DAD1 E, Sig=280,8 Ref=360,100

| Peak # | RetTime [min] | Type | Width [min] | Area [mAU*s] | Height [mAU] | Area %  |
|--------|---------------|------|-------------|--------------|--------------|---------|
| 1      | 2.800         | MF   | 0.2320      | 3.45651e4    | 2482.96143   | 86.9125 |
| 2      | 3.133         | FM   | 0.1635      | 5204.90234   | 530.56769    | 13.0875 |

Totals :                    3.97700e4  3013.52911

=====  
\*\*\* End of Report \*\*\*

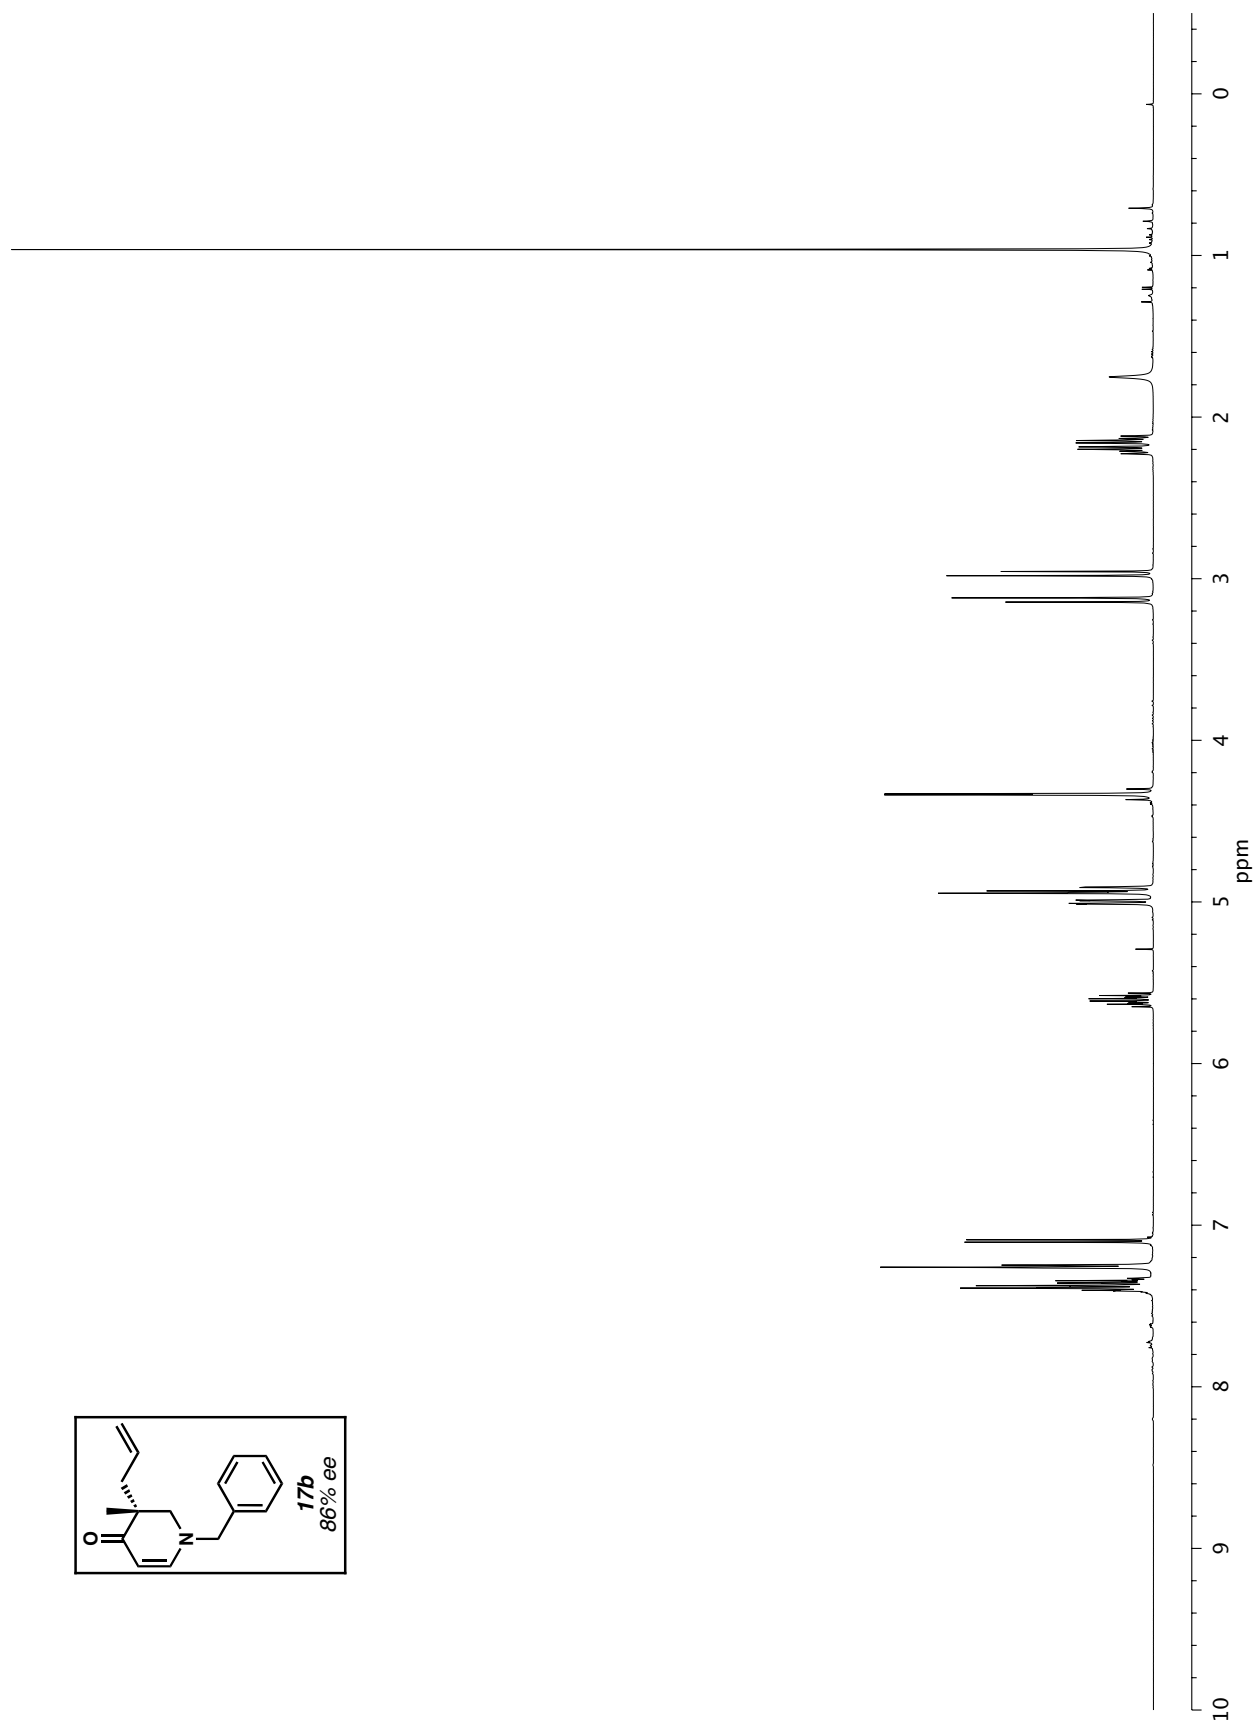Figure SI-26A.  $^1\text{H NMR}$  (500 MHz,  $\text{CDCl}_3$ ) of compound **17b**.



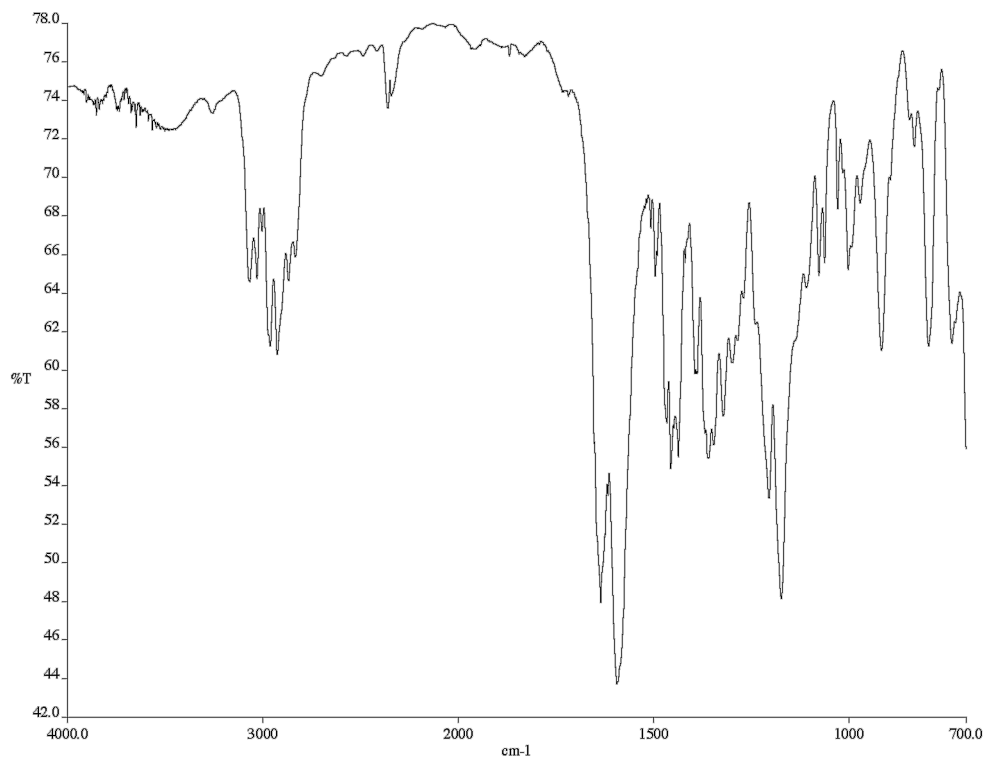

Figure SI-26B. Infrared spectrum (thin film/NaCl) of compound **17b**.

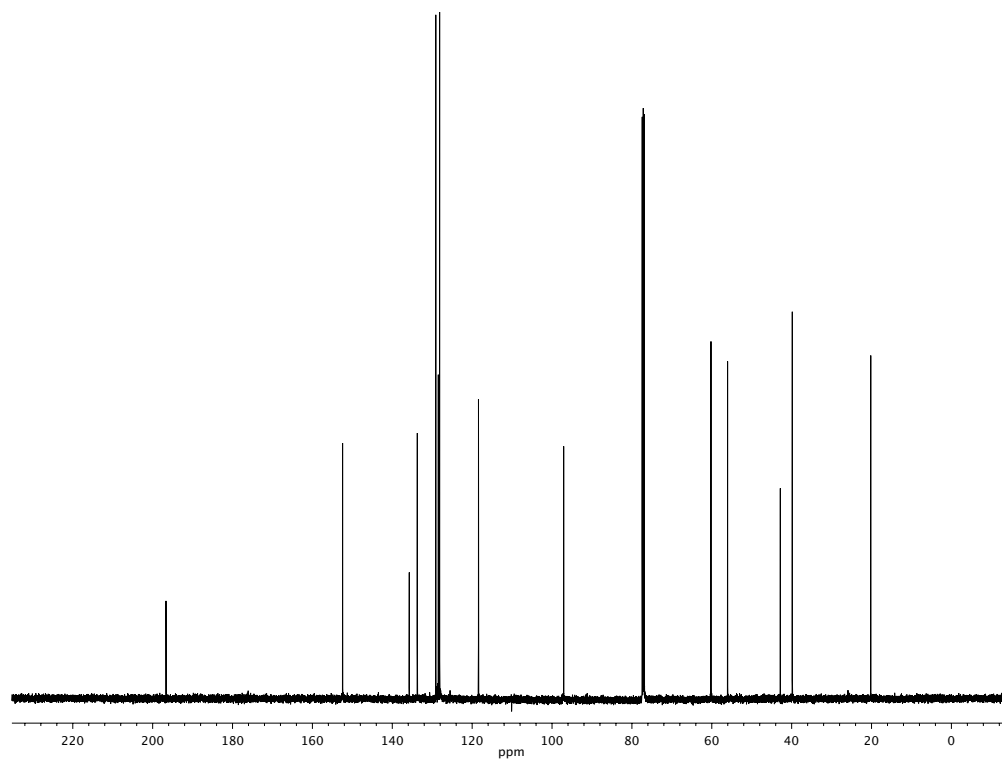

Figure SI-26C.  $^{13}\text{C}$  NMR (125 MHz,  $\text{CDCl}_3$ ) of compound **17b**.

Data File C:\CHEM32\2\DATA\WBL\ADL 2012-10-21 16-31-12\WBL-III-053-OJ-90-210-RAC.D  
 Sample Name: wbl-III-053-oj-90-210-rac

```
=====
Acq. Operator   : wbl                               Seq. Line : 13
Acq. Instrument : HPLC 2                             Location  : Vial 73
Injection Date  : 10/21/2012 8:44:23 PM             Inj       : 1
                                                    Inj Volume: 5.0 µl
Different Inj Volume from Sequence ! Actual Inj Volume : 30.0 µl
Acq. Method    : C:\CHEM32\2\DATA\WBL\ADL 2012-10-21 16-31-12\10IPA30_210.M
Last changed   : 4/28/2010 2:57:04 PM by DCB
Analysis Method : C:\CHEM32\2\METHODS\10IPA.M
Last changed   : 10/31/2012 3:00:46 PM by wbl
                (modified after loading)
Method Info    : 10% IPA 10 min Equil 1 mL/min
=====
```

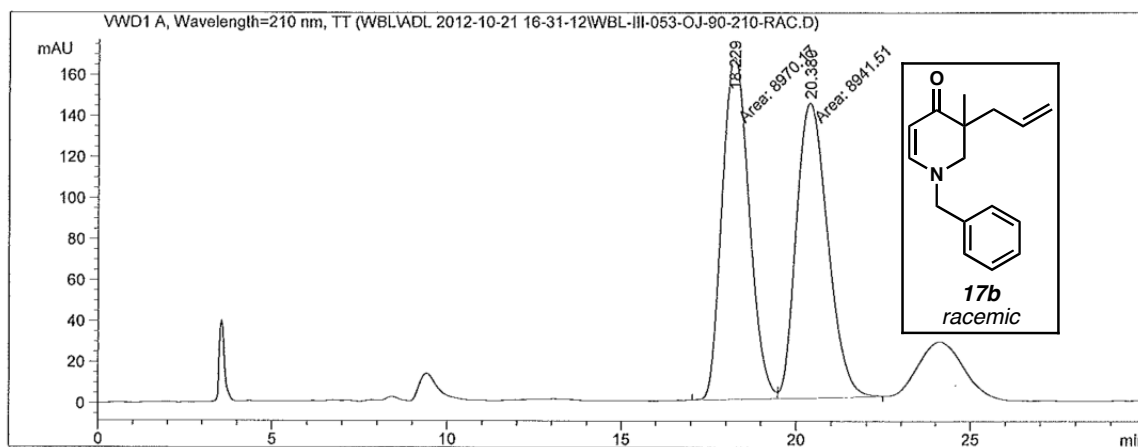

=====  
 Area Percent Report  
 =====

Sorted By : Signal  
 Multiplier: : 1.0000  
 Dilution: : 1.0000  
 Do not use Multiplier & Dilution Factor with ISTDs

Signal 1: VWD1 A, Wavelength=210 nm, TT

| Peak # | RetTime [min] | Type | Width [min] | Area mAU*s | Height [mAU] | Area %  |
|--------|---------------|------|-------------|------------|--------------|---------|
| 1      | 18.229        | MF   | 0.8969      | 8970.16992 | 166.69754    | 50.0800 |
| 2      | 20.380        | FM   | 1.0367      | 8941.51465 | 143.75609    | 49.9200 |

Totals : 1.79117e4 310.45363

=====  
 Summed Peaks Report  
 =====

Figure SI-26D. Chiral SFC data of racemic compound **17b**.

Data File C:\CHEM32\2\DATA\WBL\ADL 2012-10-21 22-57-02\WBL-III-049-OJ-90-210.D  
 Sample Name: wbl-III-049-oj-90-210

```

=====
Acq. Operator   : wbl                      Seq. Line :    5
Acq. Instrument : HPLC 2                   Location  : Vial 75
Injection Date  : 10/21/2012 11:52:16 PM   Inj       :    1
                                           Inj Volume: 5.0 µl
Different Inj Volume from Sequence !      Actual Inj Volume : 30.0 µl
Acq. Method     : C:\CHEM32\2\DATA\WBL\ADL 2012-10-21 22-57-02\10IPA30_210.M
Last changed    : 4/28/2010 2:57:04 PM by DCB
Analysis Method : C:\CHEM32\2\METHODS\10IPA.M
Last changed    : 10/31/2012 3:00:46 PM by wbl
                 (modified after loading)
Method Info     : 10% IPA  10 min  Equil  1 mL/min
=====
  
```

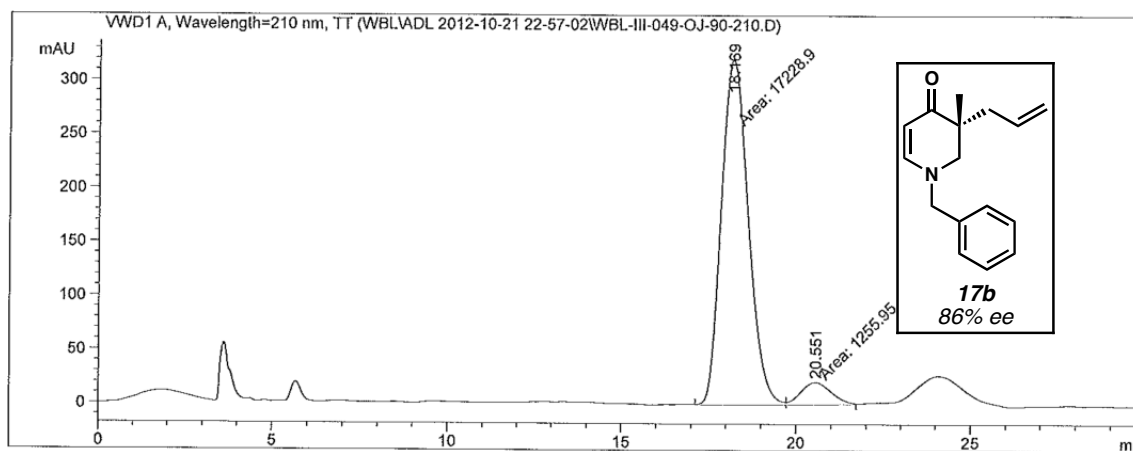

=====  
 Area Percent Report  
 =====

Sorted By : Signal  
 Multiplier: : 1.0000  
 Dilution: : 1.0000  
 Do not use Multiplier & Dilution Factor with ISTDs

Signal 1: VWD1 A, Wavelength=210 nm, TT

| Peak # | RetTime [min] | Type | Width [min] | Area mAU *s | Height [mAU] | Area %  |
|--------|---------------|------|-------------|-------------|--------------|---------|
| 1      | 18.169        | MF   | 0.8968      | 1.72289e4   | 320.17657    | 93.2055 |
| 2      | 20.551        | FM   | 1.0040      | 1255.94946  | 20.84948     | 6.7945  |

Totals : 1.84849e4 341.02606

=====  
 Summed Peaks Report  
 =====

Figure SI-26E. Chiral SFC data of enantioenriched compound **17b**.

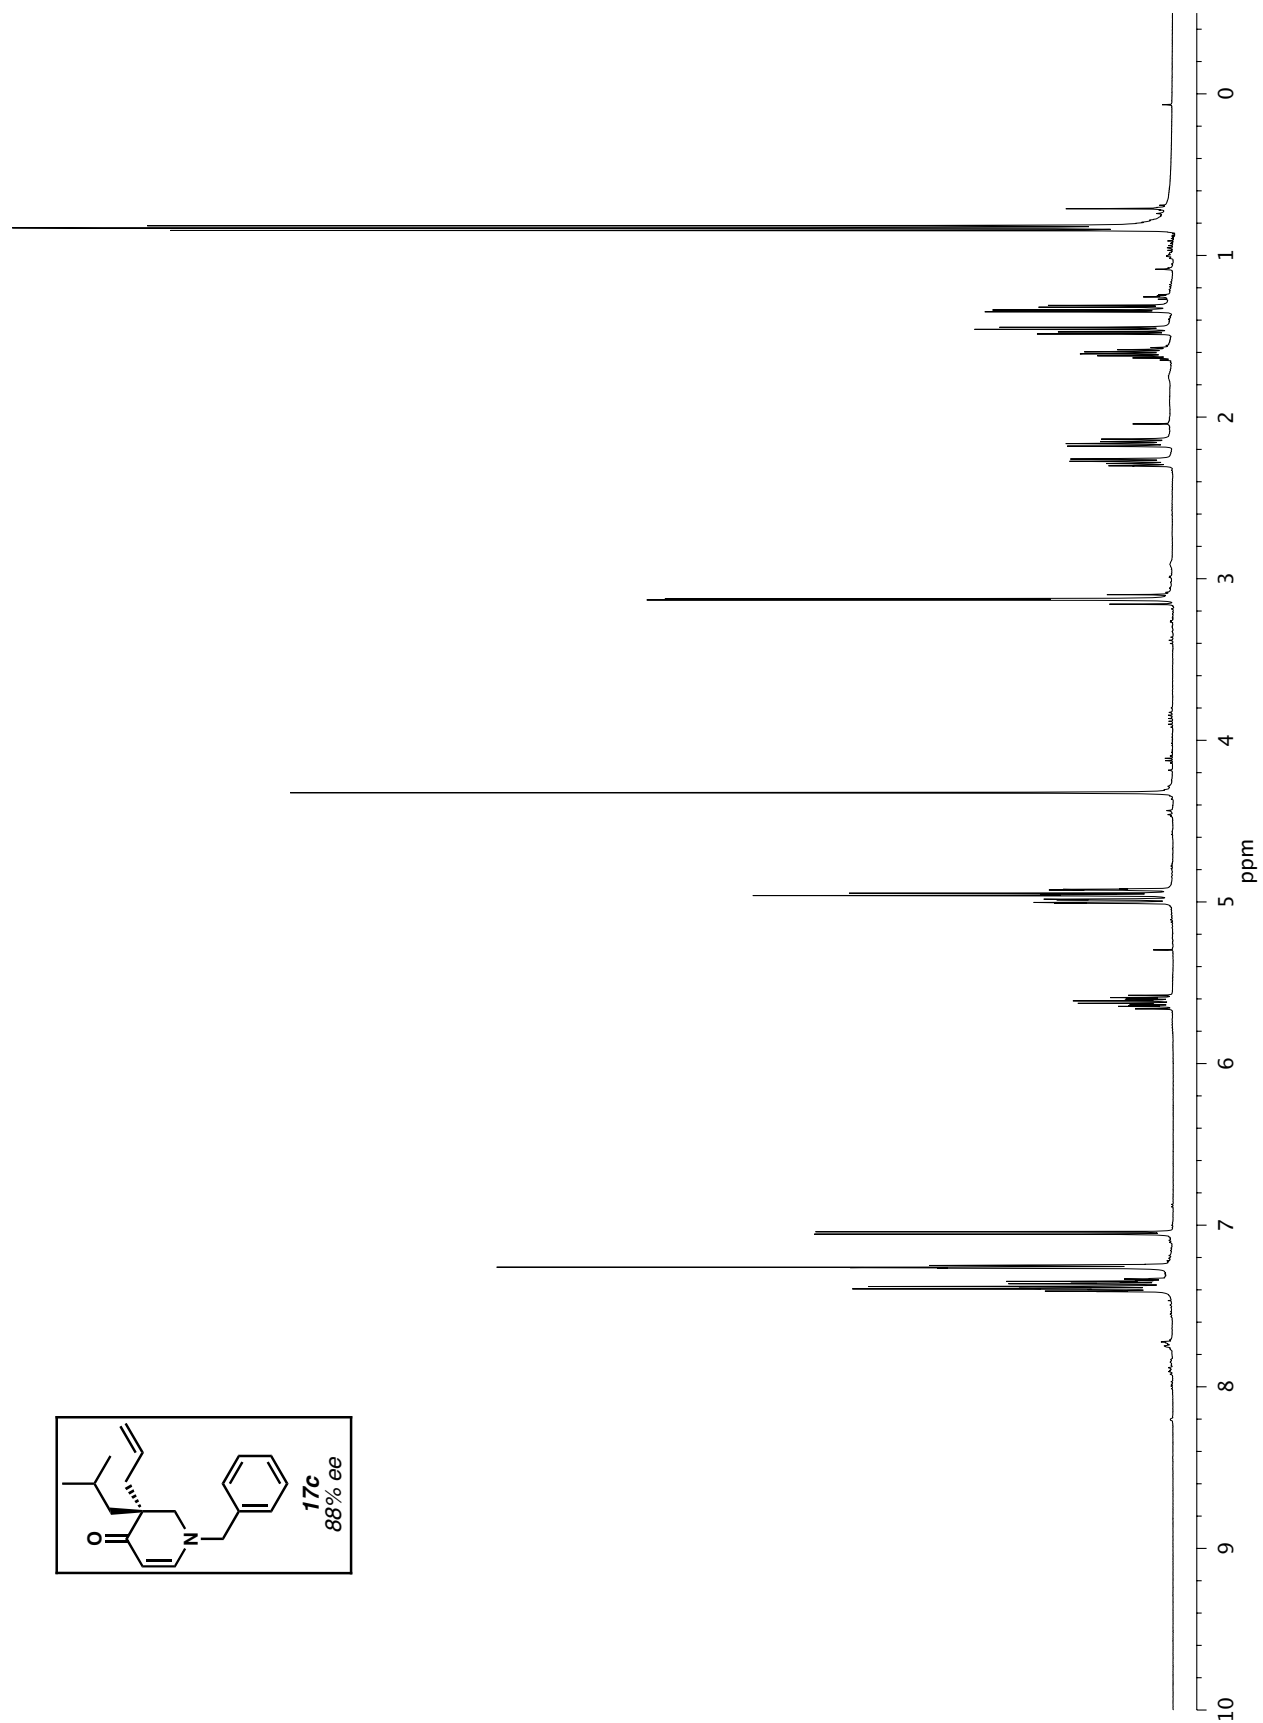

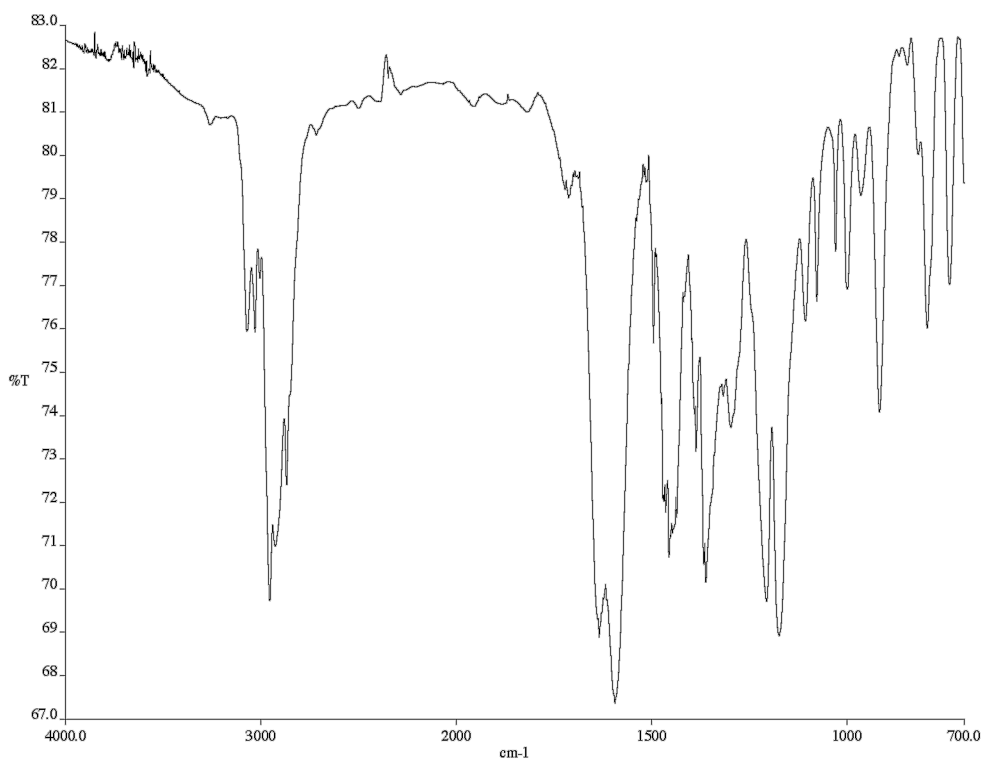

Figure SI-27B. Infrared spectrum (thin film/NaCl) of compound **17c**.

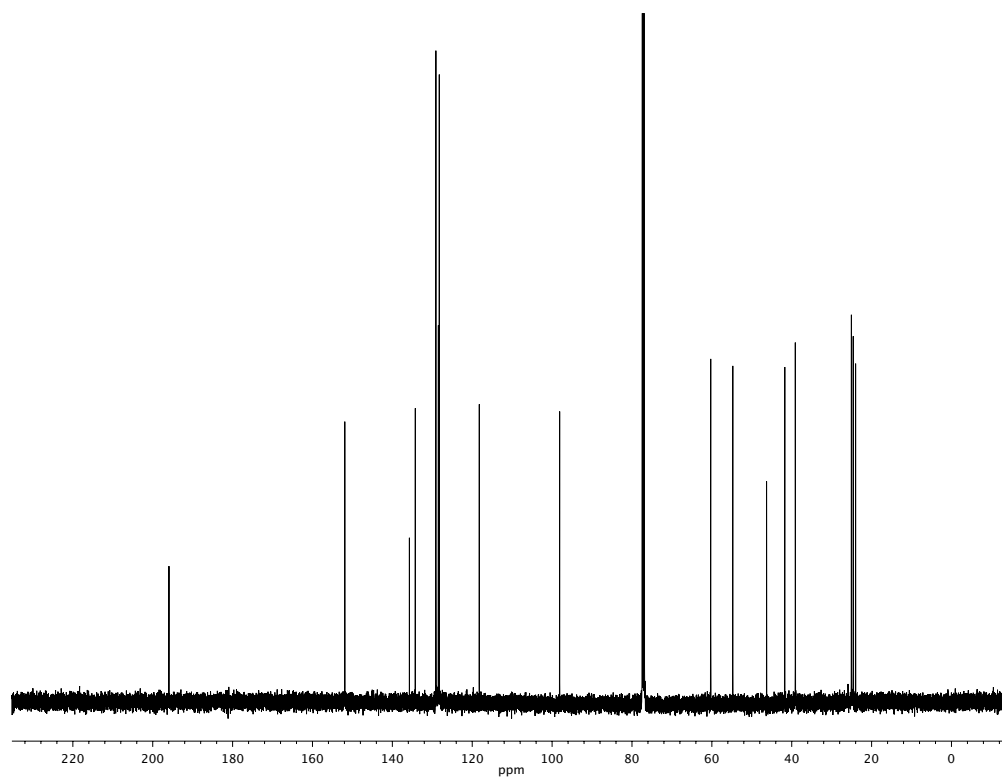

Figure SI-27C. <sup>13</sup>C NMR (125 MHz, CDCl<sub>3</sub>) of compound **17c**.

a File C:\CHEM32\2\DATA\WBL\DEF\_LC 2012-10-30 14-01-15\WBL-III-081RAC-OJ-93-210.D  
 Sample Name: wbl-III-081rac-OJ-93-210

```
=====
Acq. Operator   : wbl                               Seq. Line :    7
Acq. Instrument : HPLC 2                           Location  : Vial 76
Injection Date  : 10/30/2012 3:16:37 PM           Inj       :    1
                                                    Inj Volume: 5.0 µl
Different Inj Volume from Sequence ! Actual Inj Volume : 20.0 µl
Acq. Method    : C:\CHEM32\2\DATA\WBL\DEF_LC 2012-10-30 14-01-15\7IPA30_210.M
Last changed   : 8/1/2010 3:49:01 PM by ksp
Analysis Method : C:\CHEM32\2\METHODS\10IPA.M
Last changed   : 10/31/2012 3:00:46 PM by wbl
                (modified after loading)
Method Info    : 10% IPA  10 min  Equil  1 mL/min
=====
```

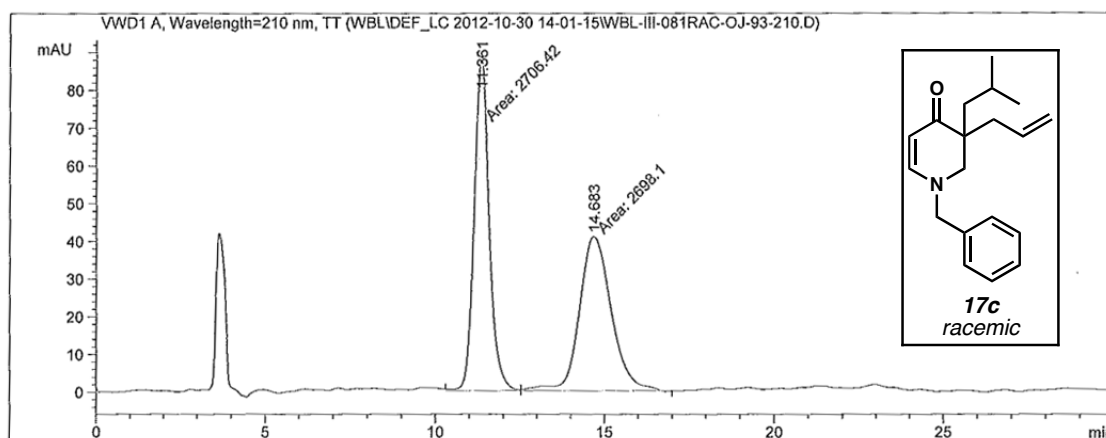

=====  
 Area Percent Report  
 =====

```
Sorted By      :      Signal
Multiplier:    :      1.0000
Dilution:      :      1.0000
Do not use Multiplier & Dilution Factor with ISTDs
```

Signal 1: VWD1 A, Wavelength=210 nm, TT

| Peak # | RetTime [min] | Type | Width [min] | Area mAU   | Area *s  | Height [mAU] | Area % |
|--------|---------------|------|-------------|------------|----------|--------------|--------|
| 1      | 11.361        | MF   | 0.5093      | 2706.41626 | 88.56285 | 50.0769      |        |
| 2      | 14.683        | FM   | 1.0990      | 2698.10400 | 40.91831 | 49.9231      |        |

Totals :                    5404.52026  129.48116

=====  
 Summed Peaks Report  
 =====

Figure SI-27D. Chiral SFC data of racemic compound 17c.

Sample Name: wbl-III-077-OJ-93-210

```

=====
Acq. Operator   : wbl                      Seq. Line :    4
Acq. Instrument : HPLC 2                  Location  : Vial 77
Injection Date  : 10/30/2012 9:00:26 PM   Inj       :    1
                                           Inj Volume: 5.0 µl
Different Inj Volume from Sequence !      Actual Inj Volume : 20.0 µl
Acq. Method    : C:\CHEM32\2\DATA\WBL\DEF_LC 2012-10-30 20-37-38\7IPA30_210.M
Last changed   : 8/1/2010 3:49:01 PM by ksp
Analysis Method : C:\CHEM32\2\METHODS\10IPA.M
Last changed   : 9/7/2012 11:51:51 AM by wbl
                                           (modified after loading)
Method Info    : 10% IPA  10 min  Equil  1 mL/min
=====

```

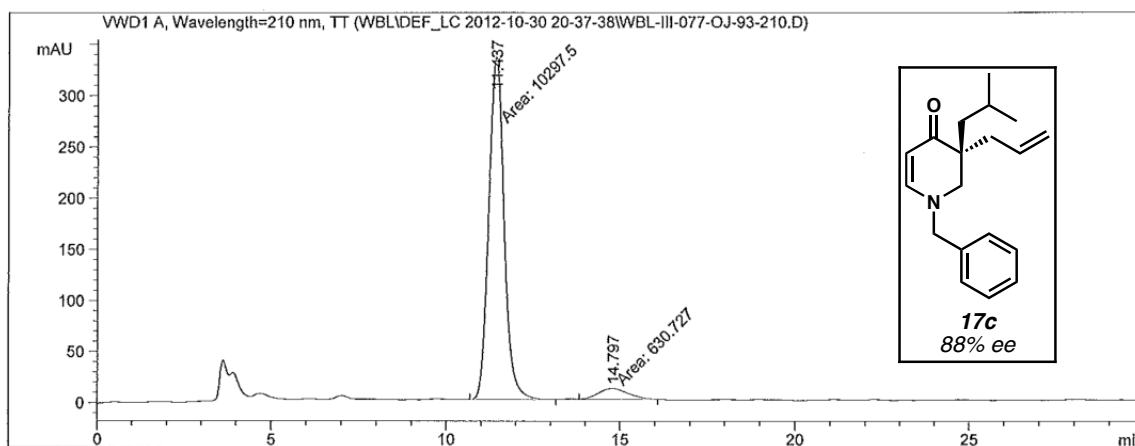

```

=====
Area Percent Report
=====

```

```

Sorted By      :      Signal
Multiplier:    :      1.0000
Dilution:      :      1.0000
Do not use Multiplier & Dilution Factor with ISTDs

```

Signal 1: VWD1 A, Wavelength=210 nm, TT

| Peak # | RetTime [min] | Type | Width [min] | Area mAU  | Area *s   | Height [mAU] | Area % |
|--------|---------------|------|-------------|-----------|-----------|--------------|--------|
| 1      | 11.437        | MM   | 0.5135      | 1.02975e4 | 334.25787 | 94.2285      |        |
| 2      | 14.797        | MM   | 0.9917      | 630.72687 | 10.59974  | 5.7715       |        |

```
Totals :                1.09283e4  344.85762
```

```

=====
Summed Peaks Report
=====

```

Figure SI-27E. Chiral SFC data of enantioenriched compound 17c.

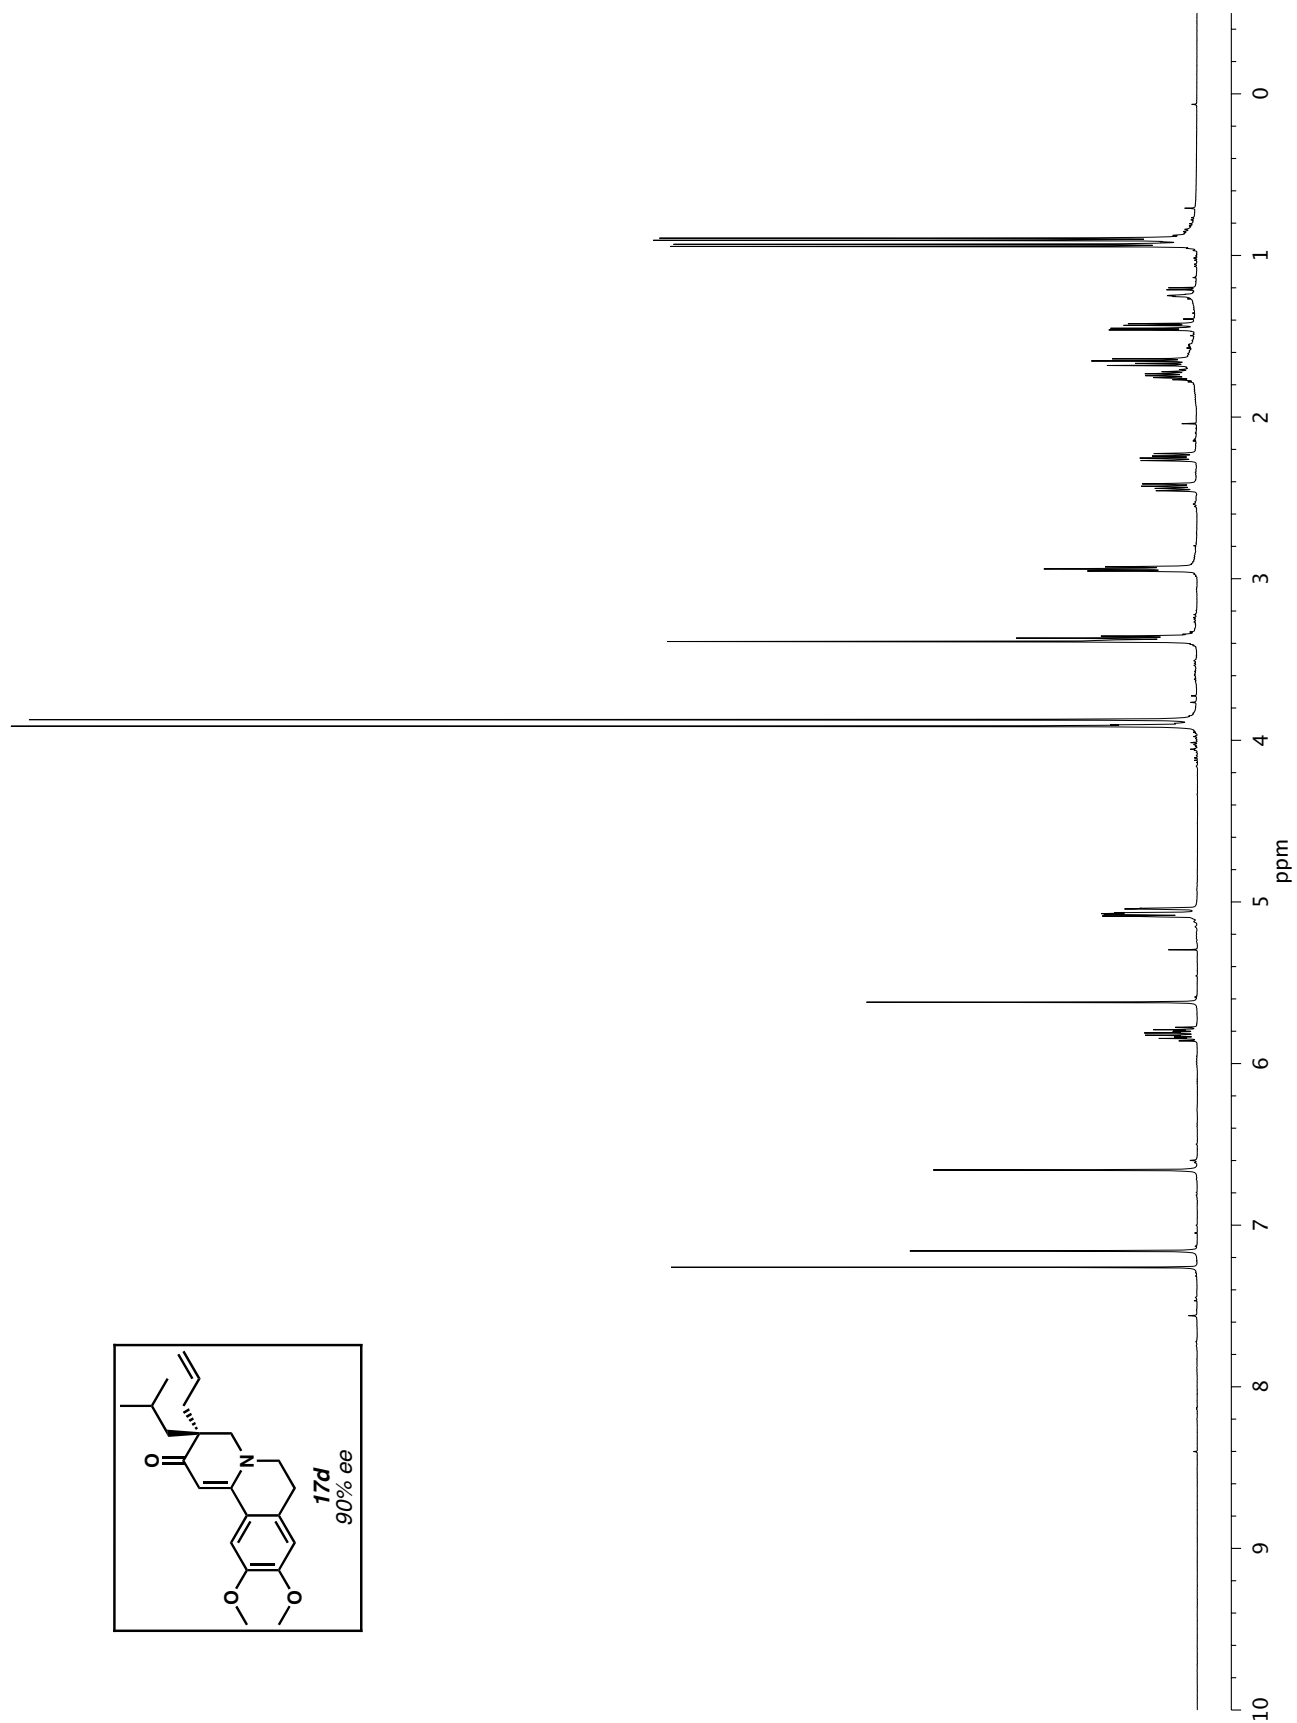Figure SI-28A.  $^1\text{H}$  NMR (500 MHz,  $\text{CDCl}_3$ ) of compound **17d**.



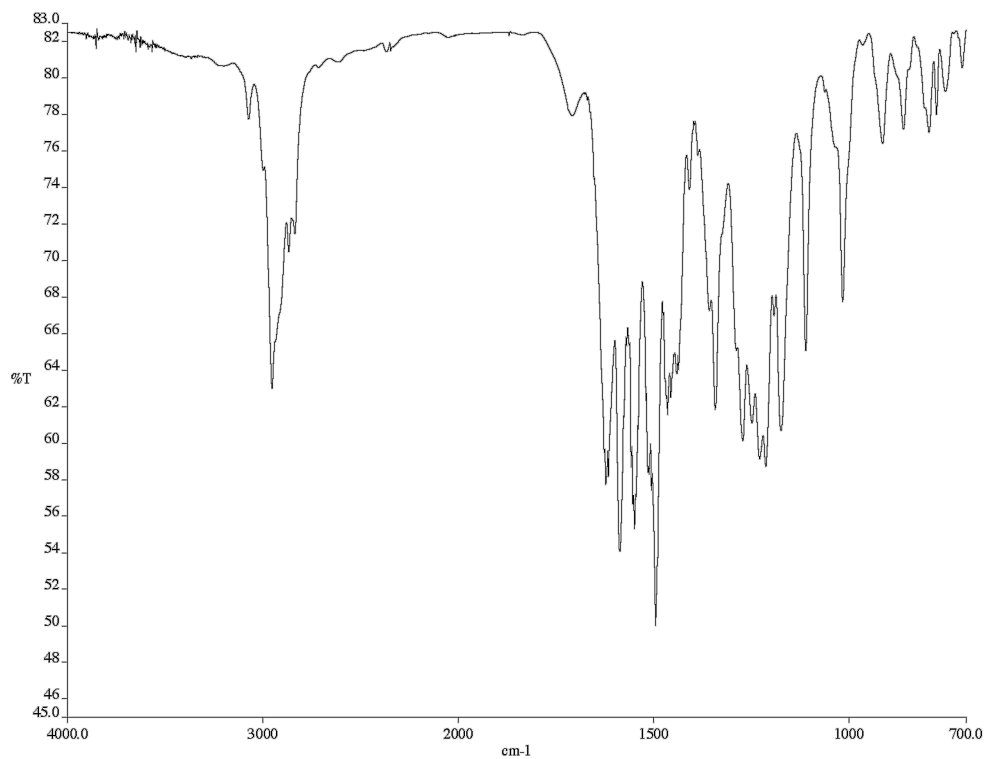

Figure SI-28B. Infrared spectrum (thin film/NaCl) of compound **17d**.

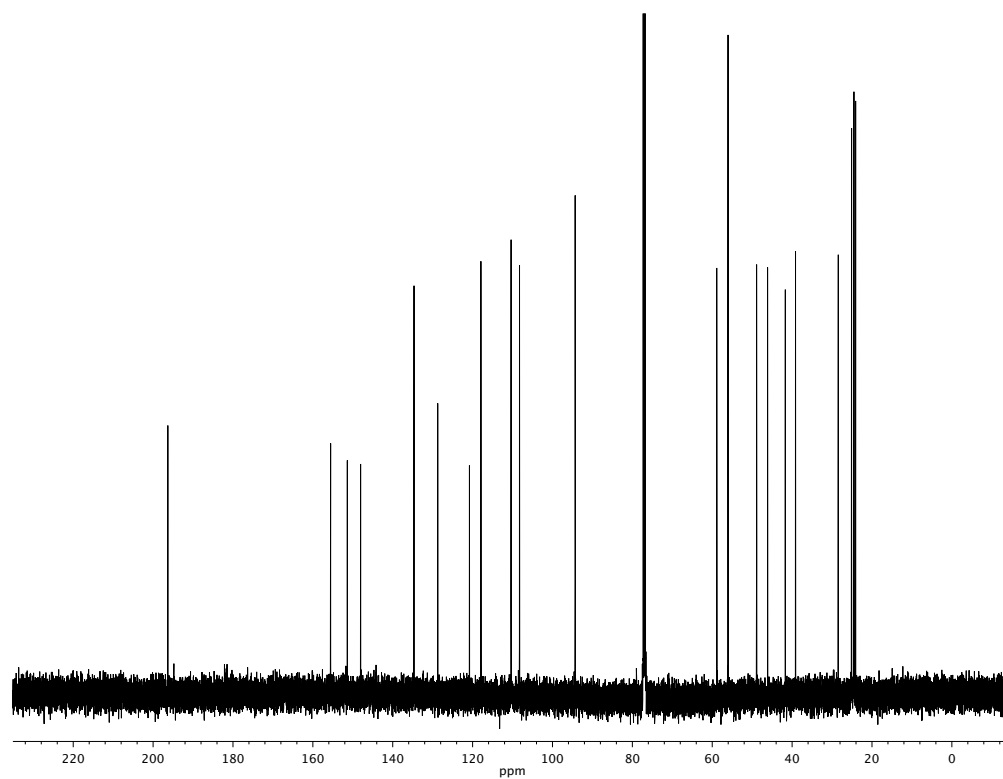

Figure SI-28C. <sup>13</sup>C NMR (125 MHz, CDCl<sub>3</sub>) of compound **17d**.

Data File C:\CHEM32\2\DATA\WBL\ADL 2012-09-04 20-16-25\WBL-II-269-AD-254-70-RAC.D  
 Sample Name: wbl-II-269-AD-254-70-rac

```
=====
Acq. Operator   : wbl                      Seq. Line :    4
Acq. Instrument : HPLC 2                  Location  : Vial 2
Injection Date  : 9/4/2012 8:39:02 PM     Inj       :    1
                                           Inj Volume: 5.0 µl
Different Inj Volume from Sequence !      Actual Inj Volume : 20.0 µl
Acq. Method     : C:\CHEM32\2\DATA\WBL\ADL 2012-09-04 20-16-25\30IPA45_254.M
Last changed    : 4/26/2010 10:48:49 PM
Analysis Method : C:\CHEM32\2\METHODS\10IPA.M
Last changed    : 4/26/2010 11:07:08 PM
Method Info     : 10% IPA  10 min  Equil  1 mL/min
=====
```

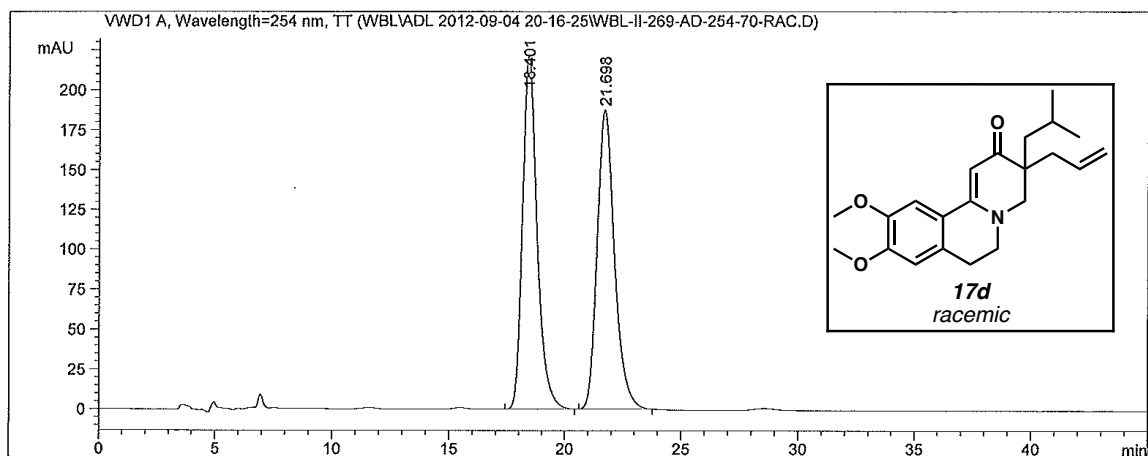

=====  
 Area Percent Report  
 =====

Sorted By : Signal  
 Multiplier: : 1.0000  
 Dilution: : 1.0000  
 Do not use Multiplier & Dilution Factor with ISTDs

Signal 1: VWD1 A, Wavelength=254 nm, TT

| Peak # | RetTime [min] | Type | Width [min] | Area mAU *s | Height [mAU] | Area %  |
|--------|---------------|------|-------------|-------------|--------------|---------|
| 1      | 18.401        | BB   | 0.6646      | 9816.01563  | 220.97881    | 50.0911 |
| 2      | 21.698        | BB   | 0.7905      | 9780.31738  | 187.30730    | 49.9089 |

Totals : 1.95963e4 408.28610

=====  
 Summed Peaks Report  
 =====

Signal 1: VWD1 A, Wavelength=254 nm, TT

Figure SI-28D. Chiral HPLC data of racemic compound 17d.

Data File C:\CHEM32\2\DATA\WBL\ADL 2012-09-05 13-55-51\WBL-II-267-AD-254--70.D  
 Sample Name: wbl-II-267-AD-254--70

```
=====
Acq. Operator   : wbl                               Seq. Line :    5
Acq. Instrument : HPLC 2                           Location  : Vial 2
Injection Date  : 9/5/2012 3:04:40 PM              Inj       :    1
                                                    Inj Volume: 5.0 µl
Different Inj Volume from Sequence !      Actual Inj Volume : 20.0 µl
Acq. Method    : C:\CHEM32\2\DATA\WBL\ADL 2012-09-05 13-55-51\30IPA45_254.M
Last changed   : 4/26/2010 10:48:49 PM
Analysis Method: C:\CHEM32\2\METHODS\10IPA.M
Last changed   : 4/26/2010 11:07:08 PM
Method Info    : 10% IPA  10 min  Equil  1 mL/min
=====
```

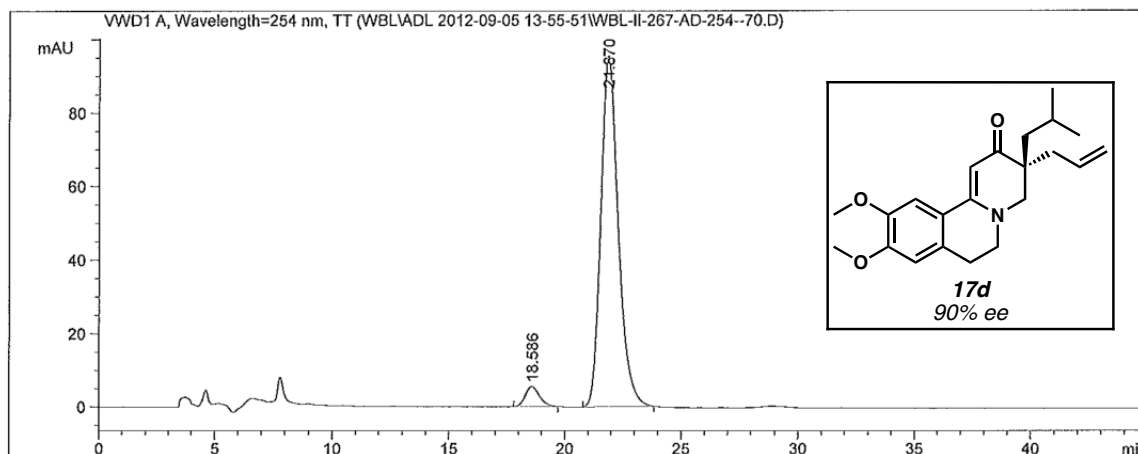

=====  
 Area Percent Report  
 =====

Sorted By : Signal  
 Multiplier: : 1.0000  
 Dilution: : 1.0000  
 Do not use Multiplier & Dilution Factor with ISTDs

Signal 1: VWD1 A, Wavelength=254 nm, TT

| Peak # | RetTime [min] | Type | Width [min] | Area mAU*s | Height [mAU] | Area %  |
|--------|---------------|------|-------------|------------|--------------|---------|
| 1      | 18.586        | BB   | 0.5086      | 235.34474  | 5.50853      | 4.4942  |
| 2      | 21.870        | BB   | 0.7687      | 5001.31982 | 95.41990     | 95.5058 |

Totals : 5236.66457 100.92843

=====  
 Summed Peaks Report  
 =====

Signal 1: VWD1 A, Wavelength=254 nm, TT

Figure SI-28E. Chiral HPLC data of enantioenriched compound 17d.

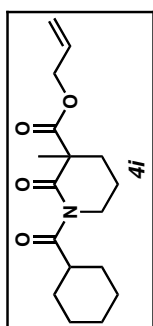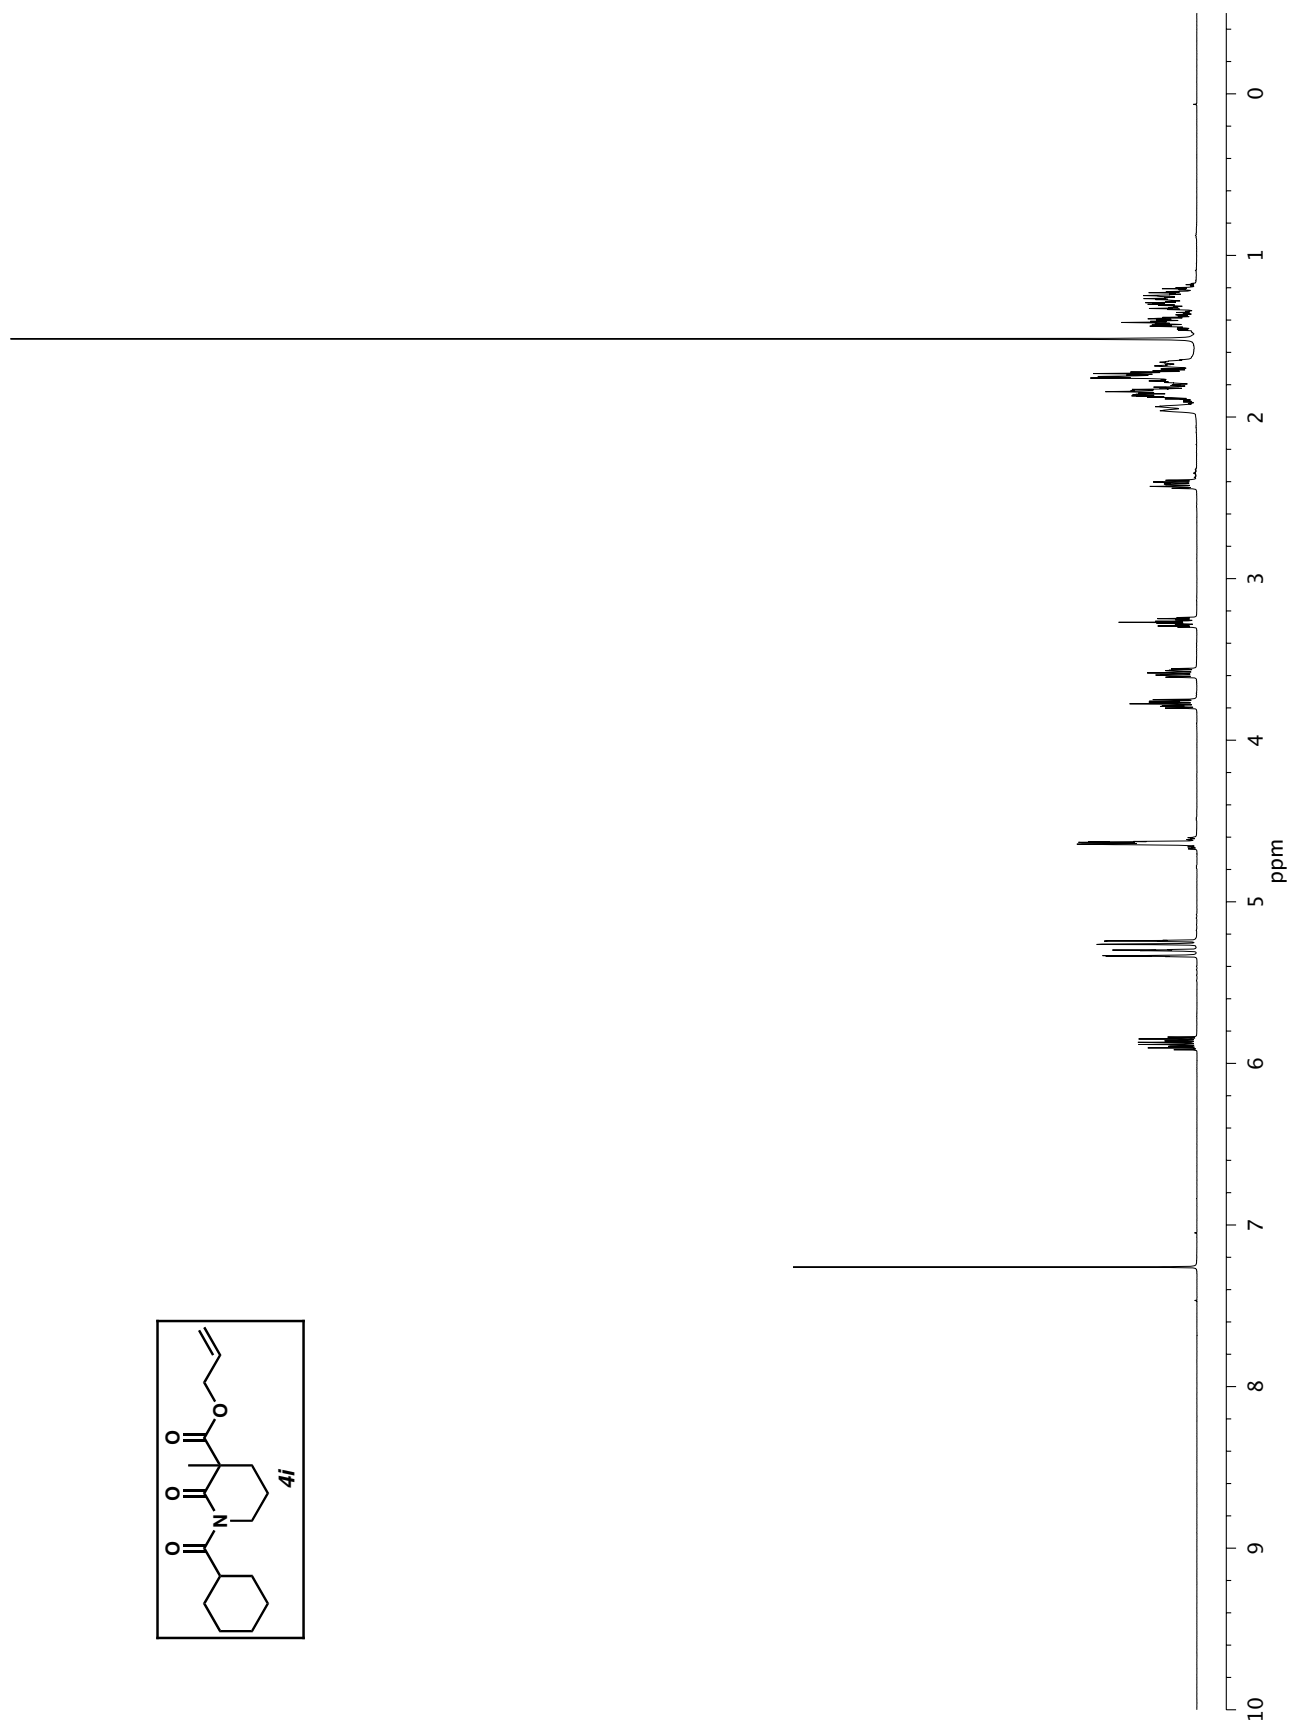

Figure SI-29A. <sup>1</sup>H NMR (500 MHz, CDCl<sub>3</sub>) of compound **4i**.

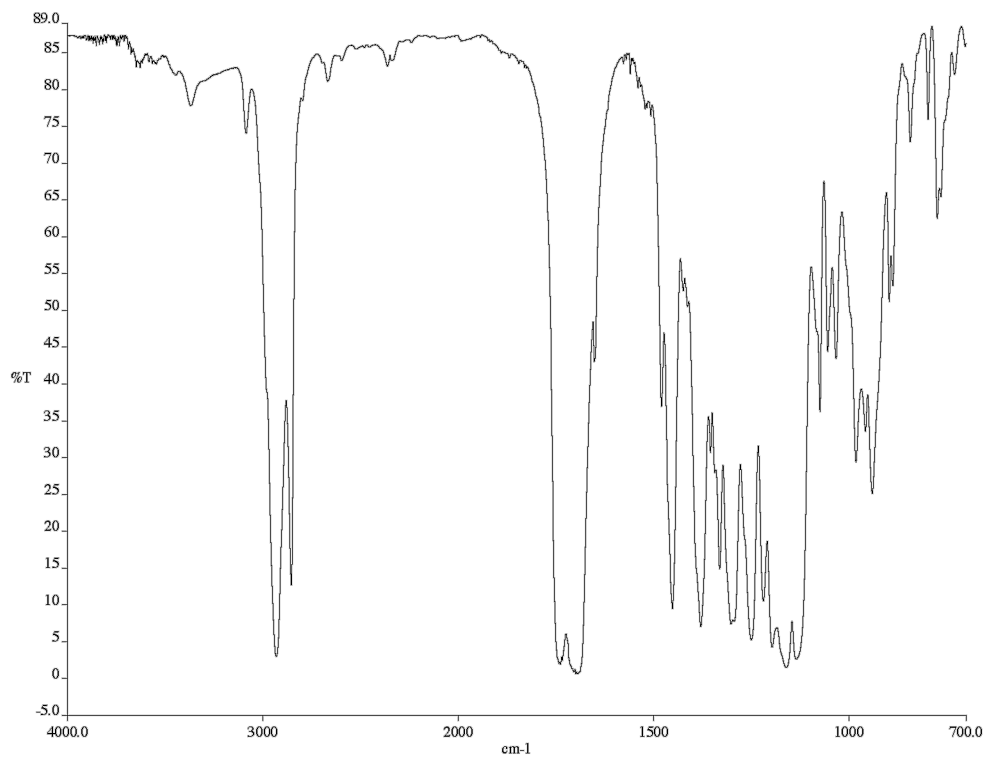

Figure SI-29B. Infrared spectrum (thin film/NaCl) of compound **4i**.

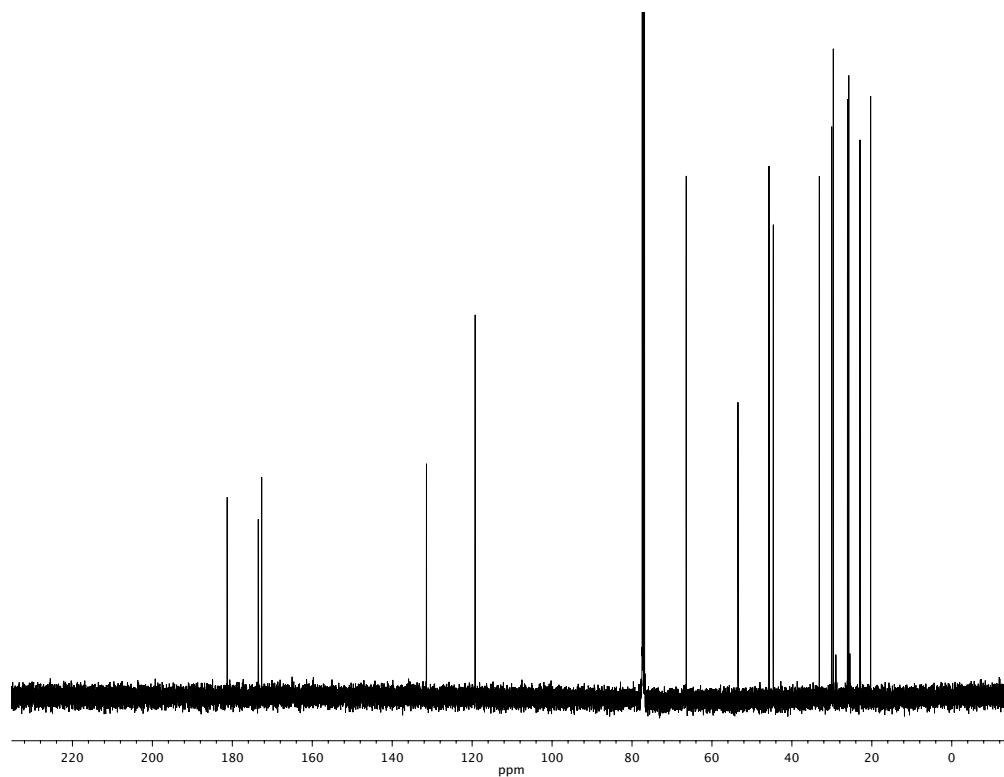

Figure SI-29C. <sup>13</sup>C NMR (125 MHz, CDCl<sub>3</sub>) of compound **4i**.

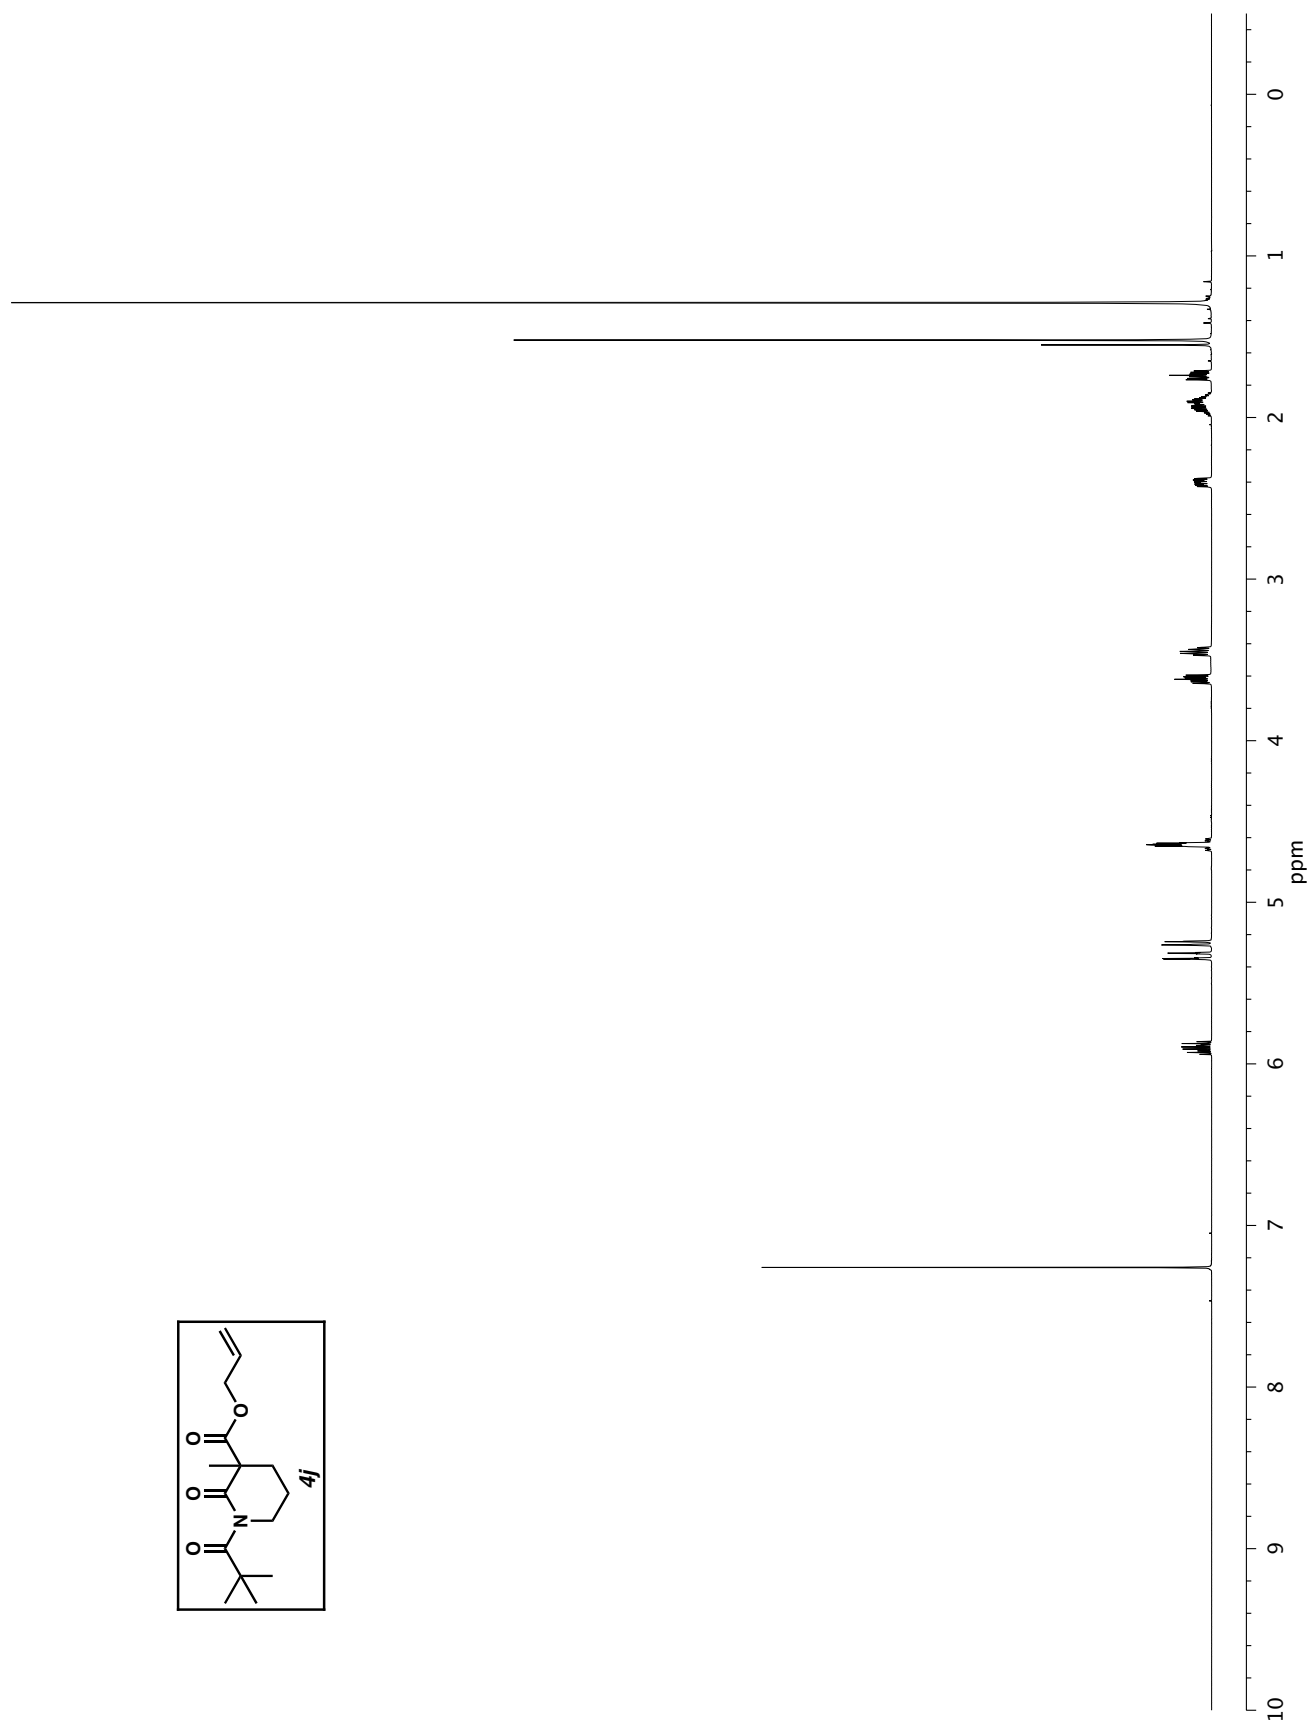Figure SI-30A.  $^1\text{H}$  NMR (500 MHz,  $\text{CDCl}_3$ ) of compound **4j**.

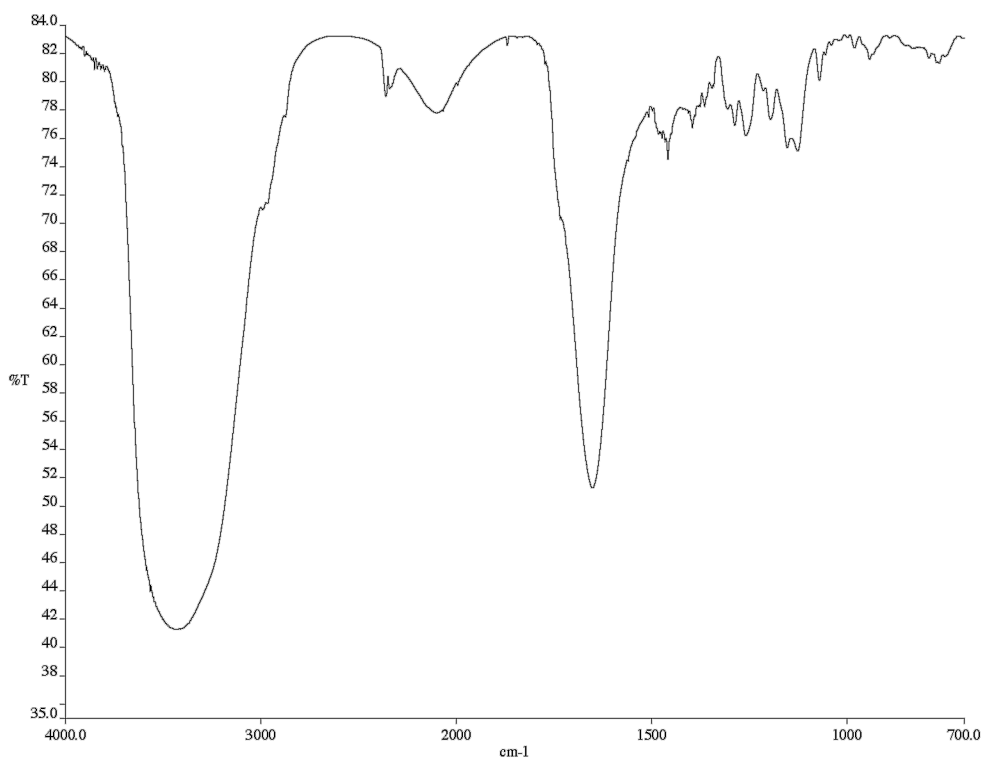

Figure SI-30B. Infrared spectrum (thin film/NaCl) of compound **4j**.

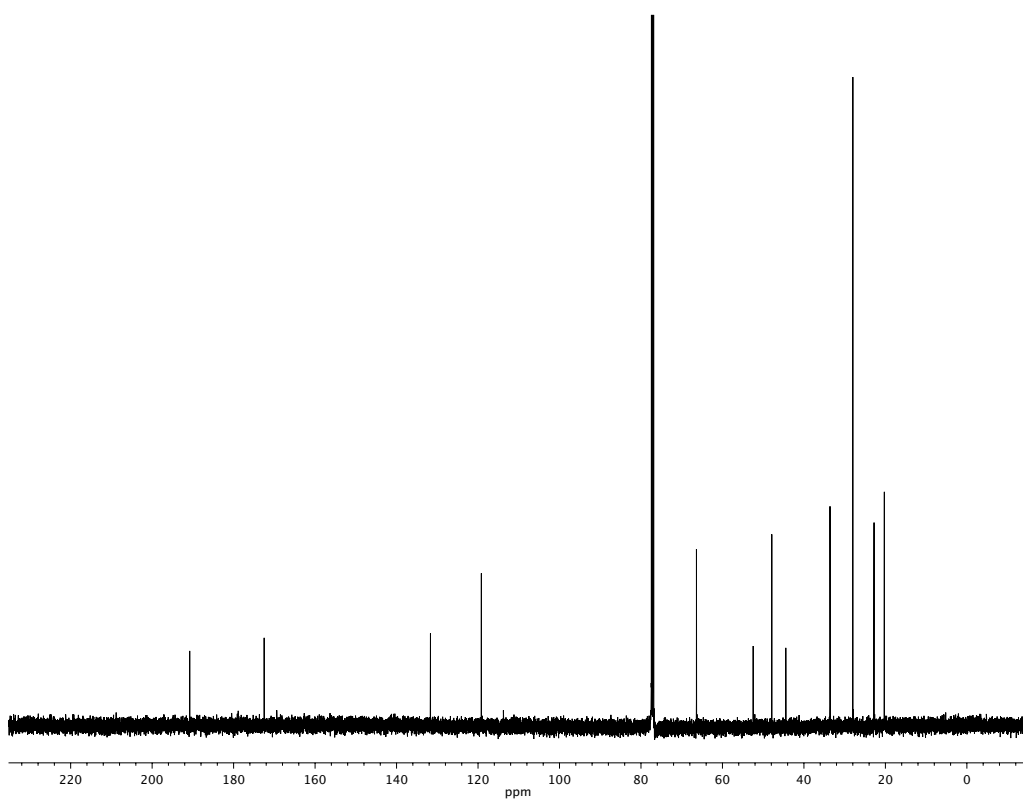

Figure SI-30C. <sup>13</sup>C NMR (125 MHz, CDCl<sub>3</sub>) of compound **4j**.

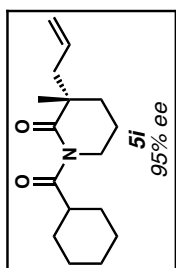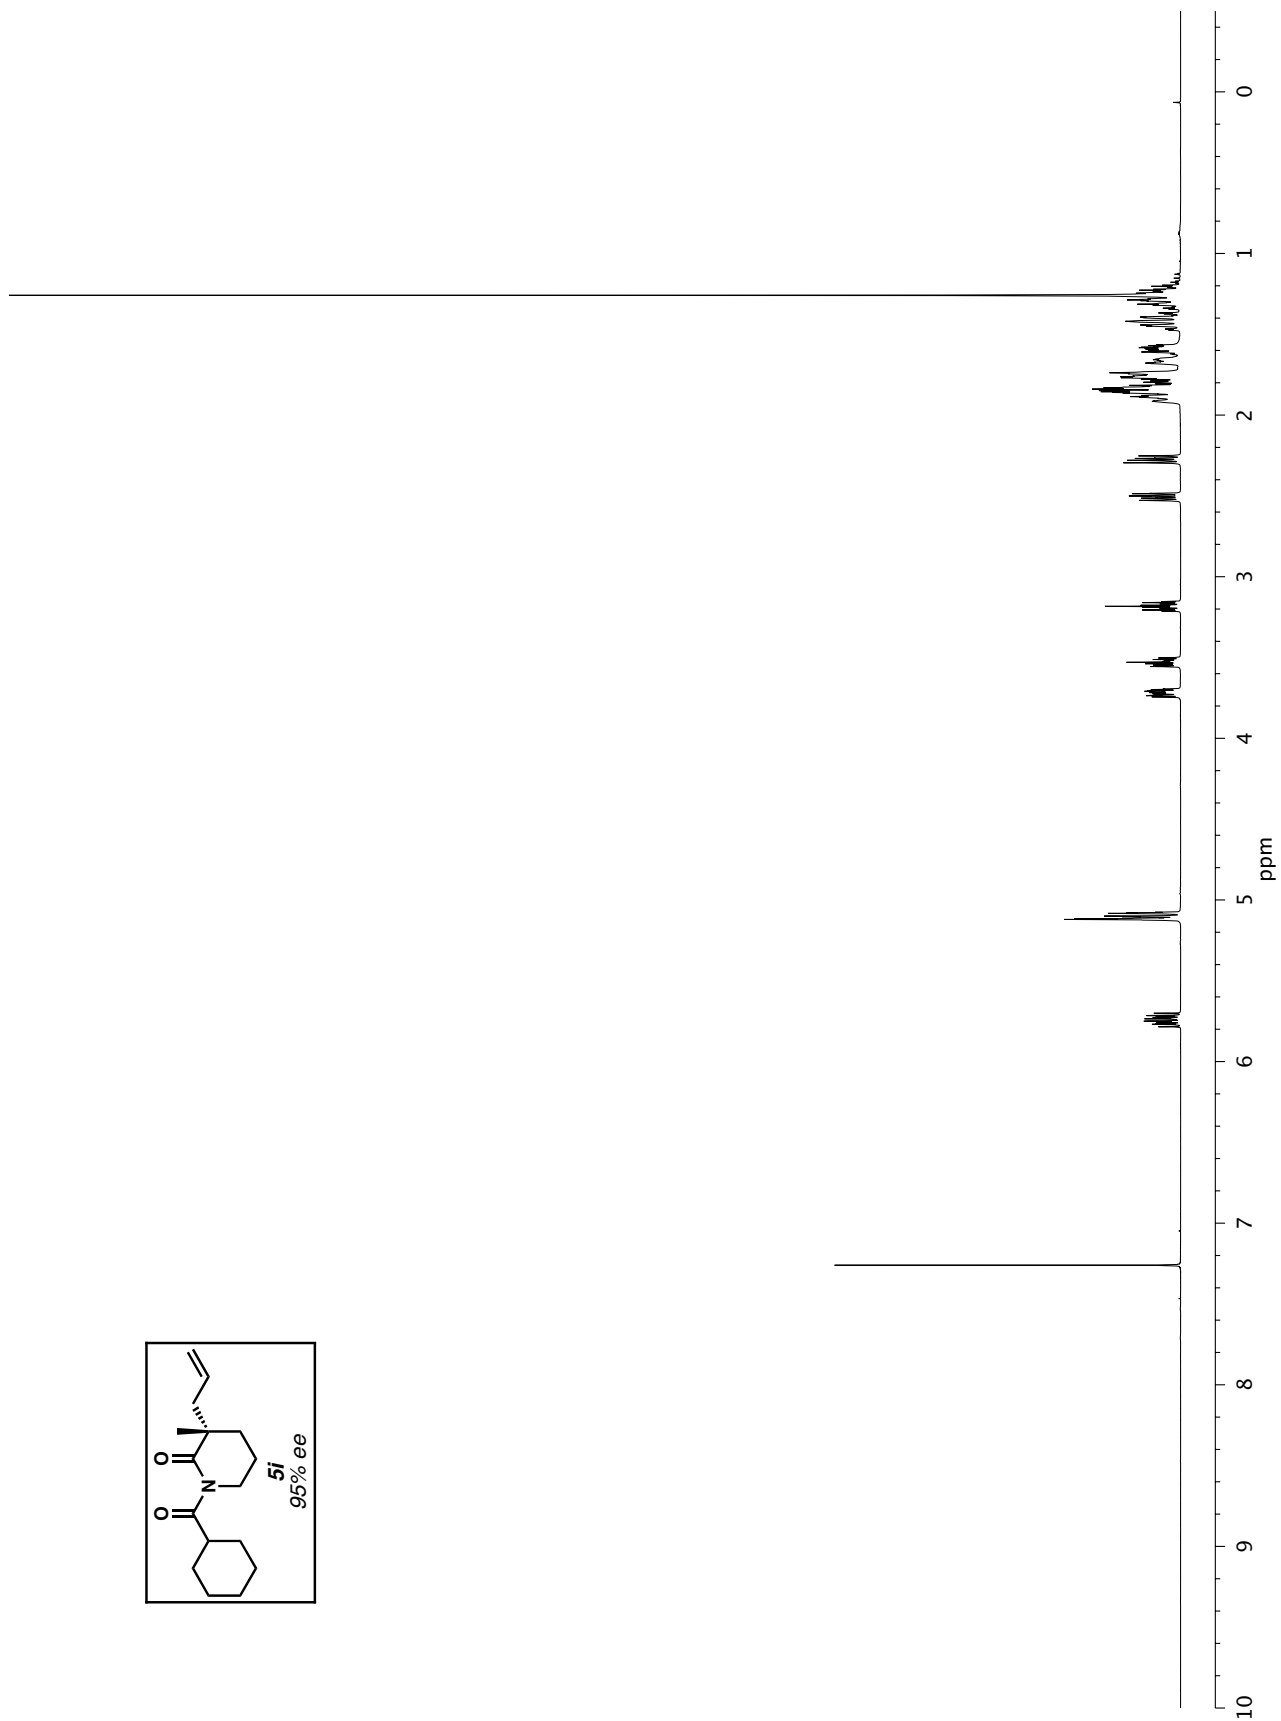

Figure SI-31A.  $^1\text{H NMR}$  (500 MHz,  $\text{CDCl}_3$ ) of compound **5i**.



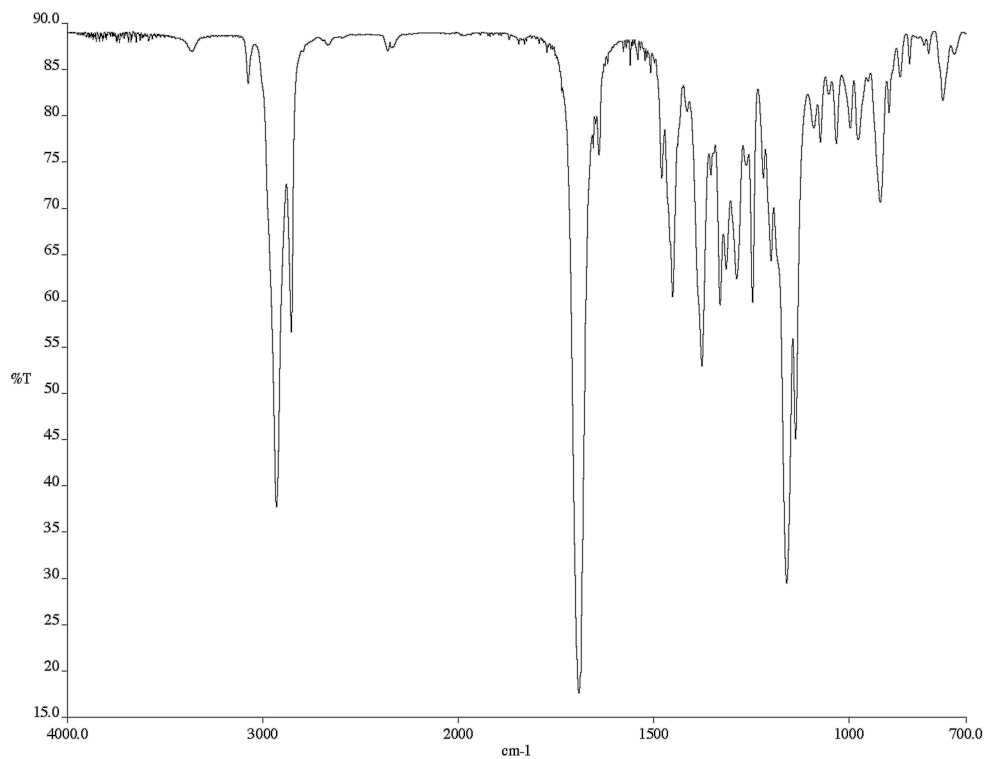

Figure SI-31B. Infrared spectrum (thin film/NaCl) of compound **5i**.

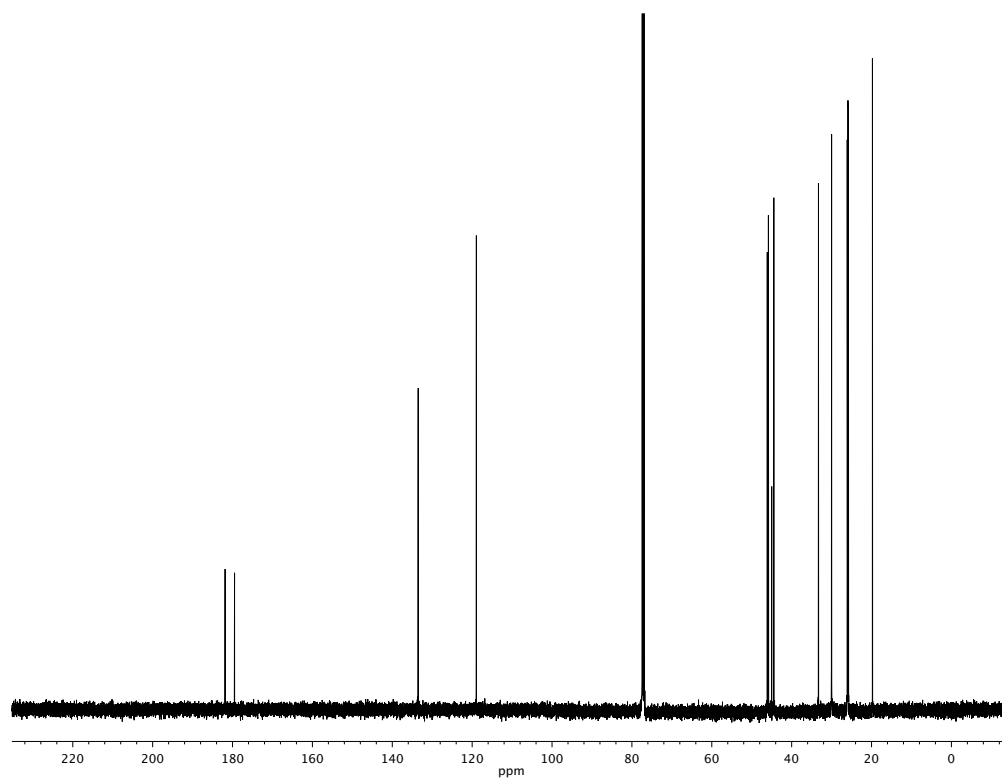

Figure SI-31C.  $^{13}\text{C}$  NMR (125 MHz,  $\text{CDCl}_3$ ) of compound **5i**.

NBB-IX-71A Col3 Sol3 nbb-ix-71a Col3 Solv 3 6/27/2012 4:36:10 PM

## Analytical Report SFC

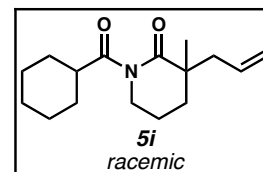

## Chromatogram Information

|                      |                                               |
|----------------------|-----------------------------------------------|
| User Name            | User                                          |
| HPLC System Name     | Jasco SFC w PDA                               |
| Injection Date       | 6/27/2012 4:19:18 PM                          |
| Volume               | 5.00 [μL]                                     |
| Sample #             | 51                                            |
| Project Name         | Cal Tech SFC                                  |
| Executed Sequence    | NBB-IX-71A Col3 Sol3                          |
| Chromatogram Name    | nbb-ix-71a Col3 Solv 3                        |
| Sample Name          |                                               |
| Acquisition Time     | 7.0 [min]                                     |
| Acquisition Sequence | NBB-IX-71A Col3 Sol3                          |
| Control Method       | Solv 3 Col 3 Isocratic 1B 5mL_min 10MPa 10min |

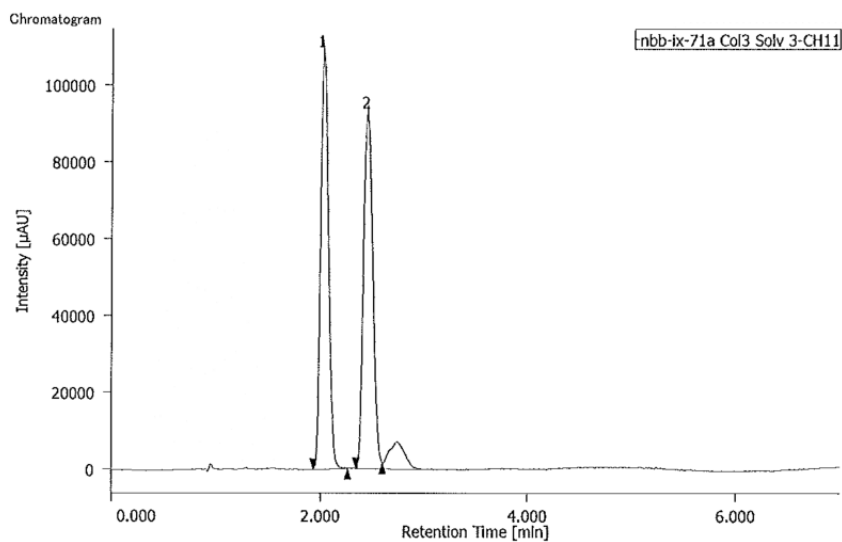

## Peak Information

| # | Peak Name | CH | tR [min] | Area [μV-sec] | Height [μV] | Area%  | Peak Start | Peak End | Peak Width | Resolution | Symmetry Factor |
|---|-----------|----|----------|---------------|-------------|--------|------------|----------|------------|------------|-----------------|
| 1 | Unknown   | 11 | 2.027    | 582758        | 109067      | 49.989 | 1.933      | 2.267    | 0.085      | 2.713      | 1.370           |
| 2 | Unknown   | 11 | 2.453    | 583015        | 93030       | 50.011 | 2.347      | 2.600    | 0.100      | N/A        | 1.264           |

1 / 1

Figure SI-31D. Chiral SFC data of racemic compound **5i**.

NBB-IX-83A Col3 Sol3 nbb-ix-83a 6/27/2012 4:54:07 PM

## Analytical Report SFC

## Chromatogram Information

User: Jasoo SFC w PDA  
 HPLC System Name: NBB-IX-83A Col3 Sol3  
 Injection Date: 6/27/2012 4:44:41 PM  
 Volume: 5.00 [μL]  
 Sample #: 6  
 Project Name: Cal Tech SFC  
 Executed Sequence: NBB-IX-83A Col3 Sol3  
 Chromatogram Name: nbb-ix-83a  
 Sample Name:  
 Acquisition Time: 7.0 [min]  
 Acquisition Sequence: NBB-IX-83A Col3 Sol3  
 Control Method: Solv 3 Col 3 Isocratic 1B 5mL\_min 10MPa 10min

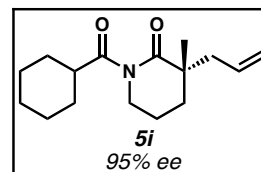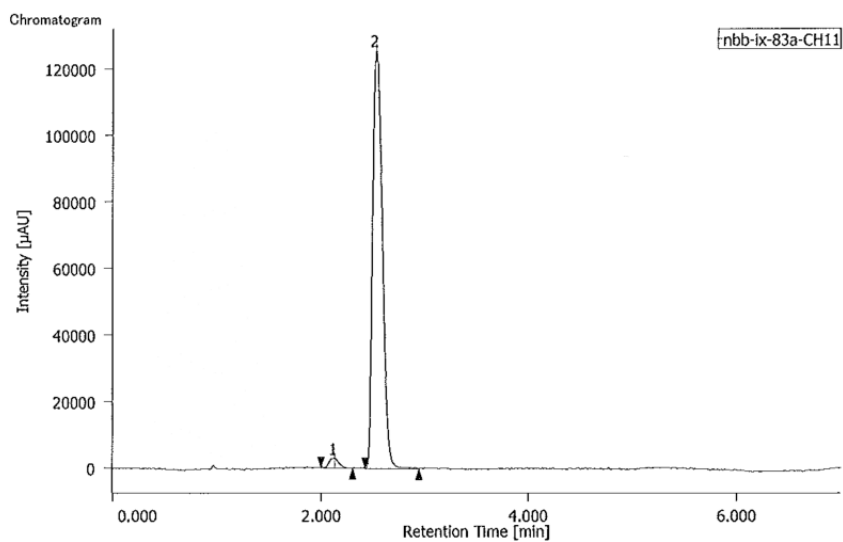

## Peak Information

| # | Peak Name | CH | tR [min] | Area [μV·sec] | Height [μV] | Area%  | Peak Start | Peak End | Peak Width | Resolution | Symmetry Factor |
|---|-----------|----|----------|---------------|-------------|--------|------------|----------|------------|------------|-----------------|
| 1 | Unknown   | 11 | 2.133    | 20281         | 2998        | 2.414  | 2.000      | 2.307    | 0.102      | 2.287      | 0.955           |
| 2 | Unknown   | 11 | 2.533    | 819906        | 125753      | 97.586 | 2.427      | 2.947    | 0.104      | N/A        | 1.386           |

1 / 1

Figure SI-31E. Chiral SFC data of enantioenriched compound **5i**.

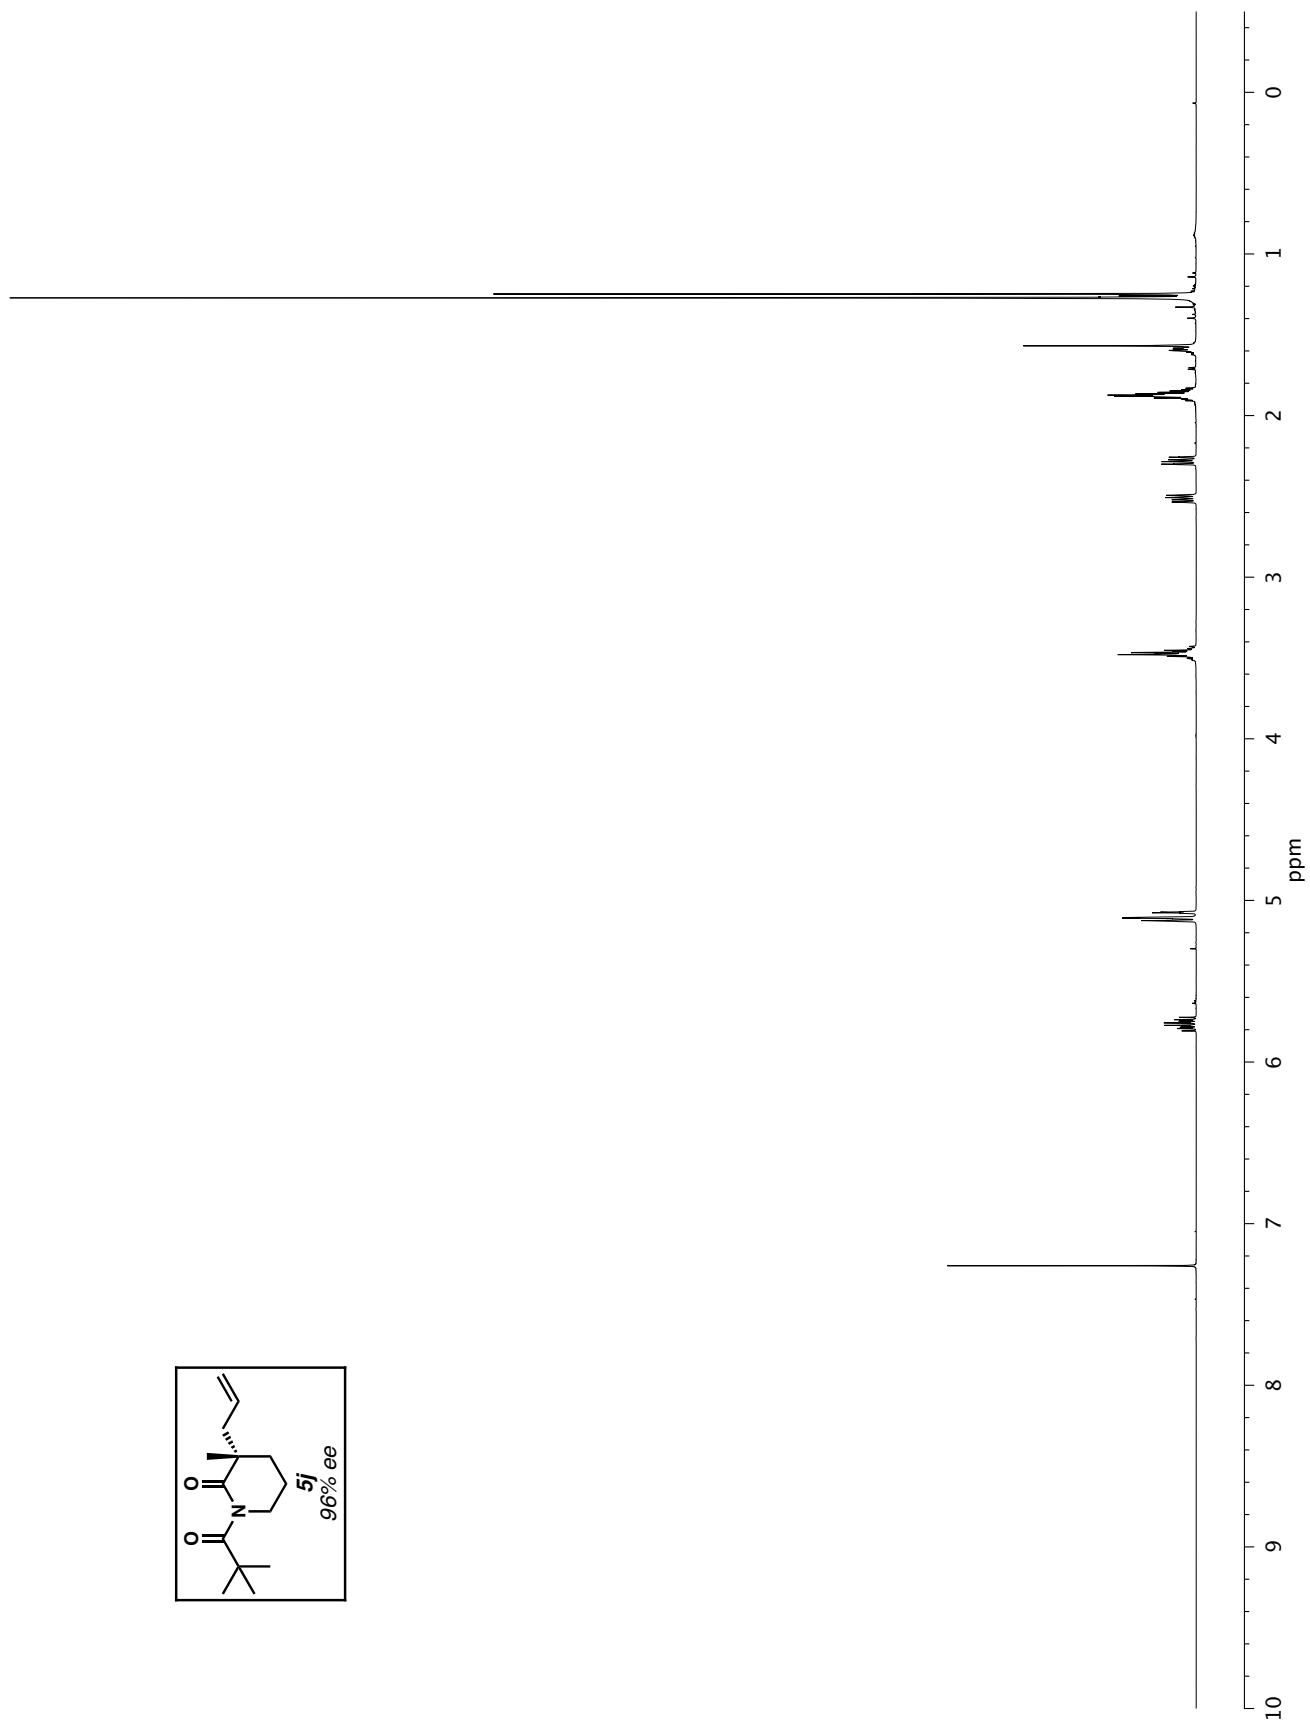Figure SI-32A.  $^1\text{H NMR}$  (500 MHz,  $\text{CDCl}_3$ ) of compound **5j**.

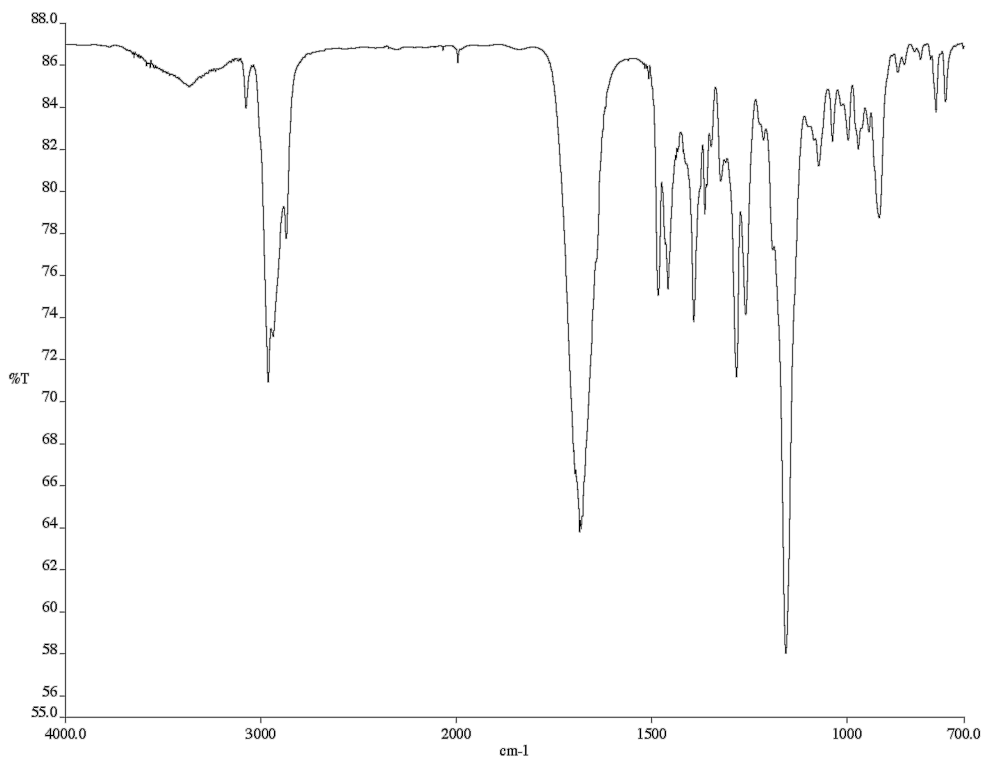

Figure SI-32B. Infrared spectrum (thin film/NaCl) of compound **5j**.

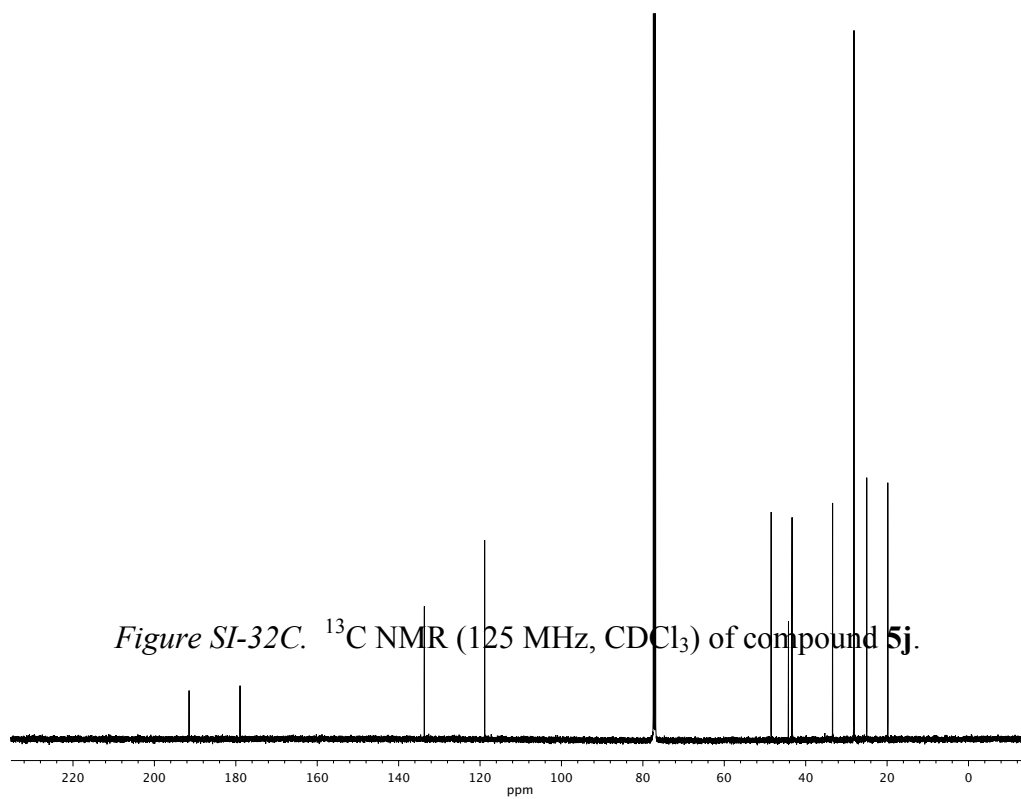

Figure SI-32C. <sup>13</sup>C NMR (125 MHz, CDCl<sub>3</sub>) of compound **5j**.

Data File C:\CHEM32\1\DATA\DCD\DCD-IV-101.D  
 Sample Name: DCD-IV-101

```

=====
Acq. Operator   : DCD                      Seq. Line :    3
Acq. Instrument : HPLC 1                  Location  : Vial 31
Injection Date  : 7/31/2012 3:42:30 PM    Inj       :    1
                                           Inj Volume: 5.0 µl

Acq. Method     : C:\CHEM32\1\METHODS\5IPA15_254.M
Last changed    : 5/28/2010 3:34:42 PM by AYH
Analysis Method : C:\CHEM32\1\METHODS\2IPA_EQUIL.M
Last changed    : 4/26/2010 10:02:39 PM
Method Info     : 2% IPA   10 min equil   1 mL/min
=====
  
```

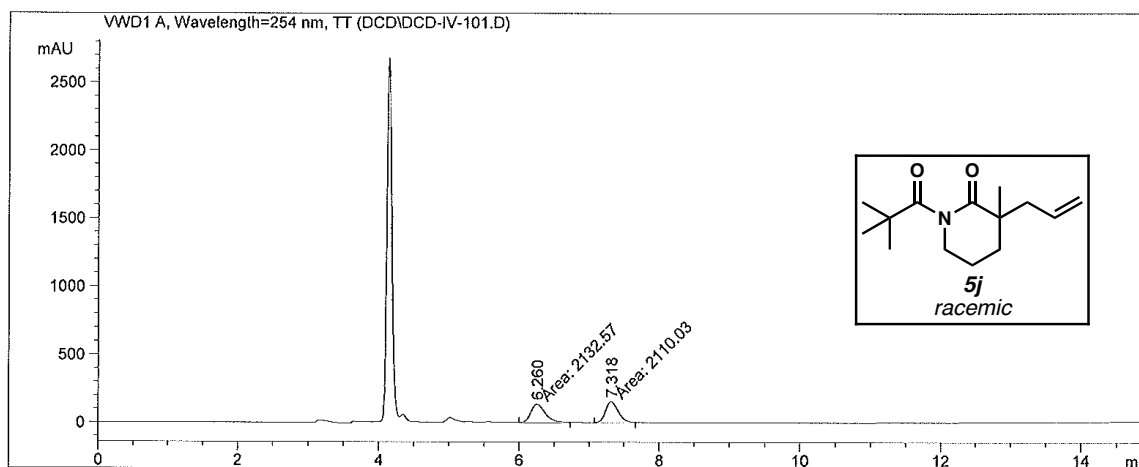

=====  
 Area Percent Report  
 =====

Sorted By : Signal  
 Multiplier: : 1.0000  
 Dilution: : 1.0000  
 Do not use Multiplier & Dilution Factor with ISTDs

Signal 1: VWD1 A, Wavelength=254 nm, TT

| Peak # | RetTime [min] | Type | Width [min] | Area mAU*s | Height [mAU] | Area %  |
|--------|---------------|------|-------------|------------|--------------|---------|
| 1      | 6.260         | MM   | 0.2537      | 2132.57080 | 140.07813    | 50.2656 |
| 2      | 7.318         | MM   | 0.2203      | 2110.03296 | 159.66458    | 49.7344 |

Totals :                    4242.60376   299.74271

=====  
 Summed Peaks Report  
 =====

Signal 1: VWD1 A, Wavelength=254 nm, TT

Figure SI-32D. Chiral HPLC data of racemic compound **5j**.

Data File C:\CHEM32\1\DATA\DCD\DCD-IV-103C-2.D  
 Sample Name: DCD-IV-103c-2

```

=====
Acq. Operator   : DCD                      Seq. Line :    3
Acq. Instrument : HPLC 1                   Location  : Vial 95
Injection Date  : 9/7/2012 1:48:27 PM      Inj       :    1
                                           Inj Volume: 5.0 µl

Acq. Method    : C:\CHEM32\1\METHODS\5IPA20_210.M
Last changed   : 7/5/2012 5:09:36 PM by DCD
Analysis Method: C:\CHEM32\1\METHODS\5IPA60_280.M
Last changed   : 9/7/2012 2:25:21 PM by ANM
                (modified after loading)
Method Info    : 5% IPA   60 min  280 nm  1 mL/min
=====
  
```

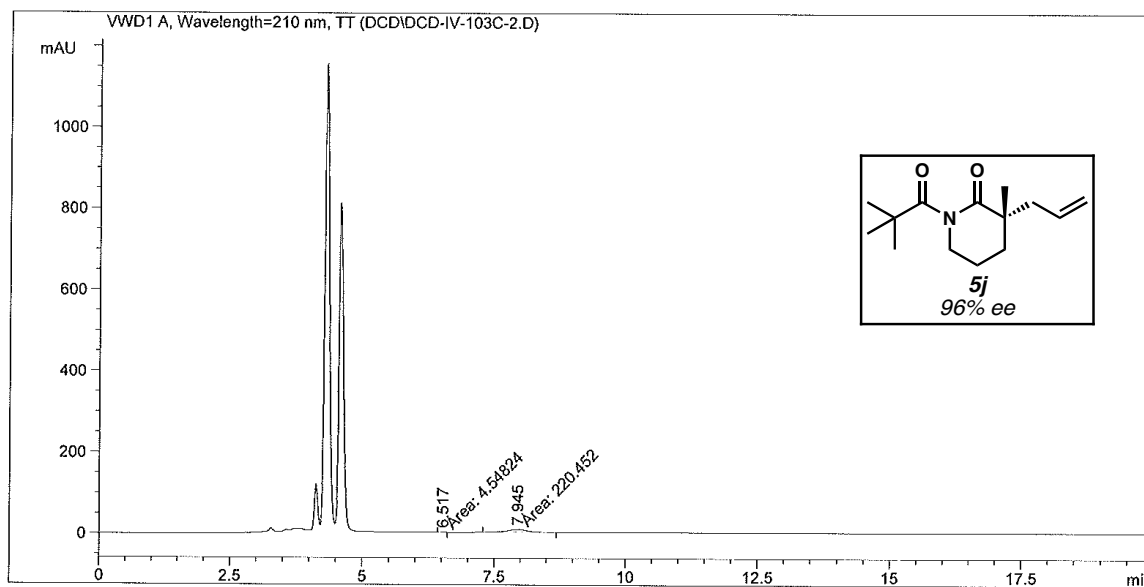

=====  
 Area Percent Report  
 =====

Sorted By : Signal  
 Multiplier: : 1.0000  
 Dilution: : 1.0000  
 Do not use Multiplier & Dilution Factor with ISTDs

Signal 1: VWD1 A, Wavelength=210 nm, TT

| Peak # | RetTime [min] | Type | Width [min] | Area mAU *s | Height [mAU] | Area %  |
|--------|---------------|------|-------------|-------------|--------------|---------|
| 1      | 6.517         | MM   | 0.1193      | 4.54824     | 6.35558e-1   | 2.0214  |
| 2      | 7.945         | MM   | 0.4770      | 220.45190   | 7.70195      | 97.9786 |

Totals : 225.00014 8.33751

Figure SI-32E. Chiral HPLC data of enantioenriched compound **5j**.

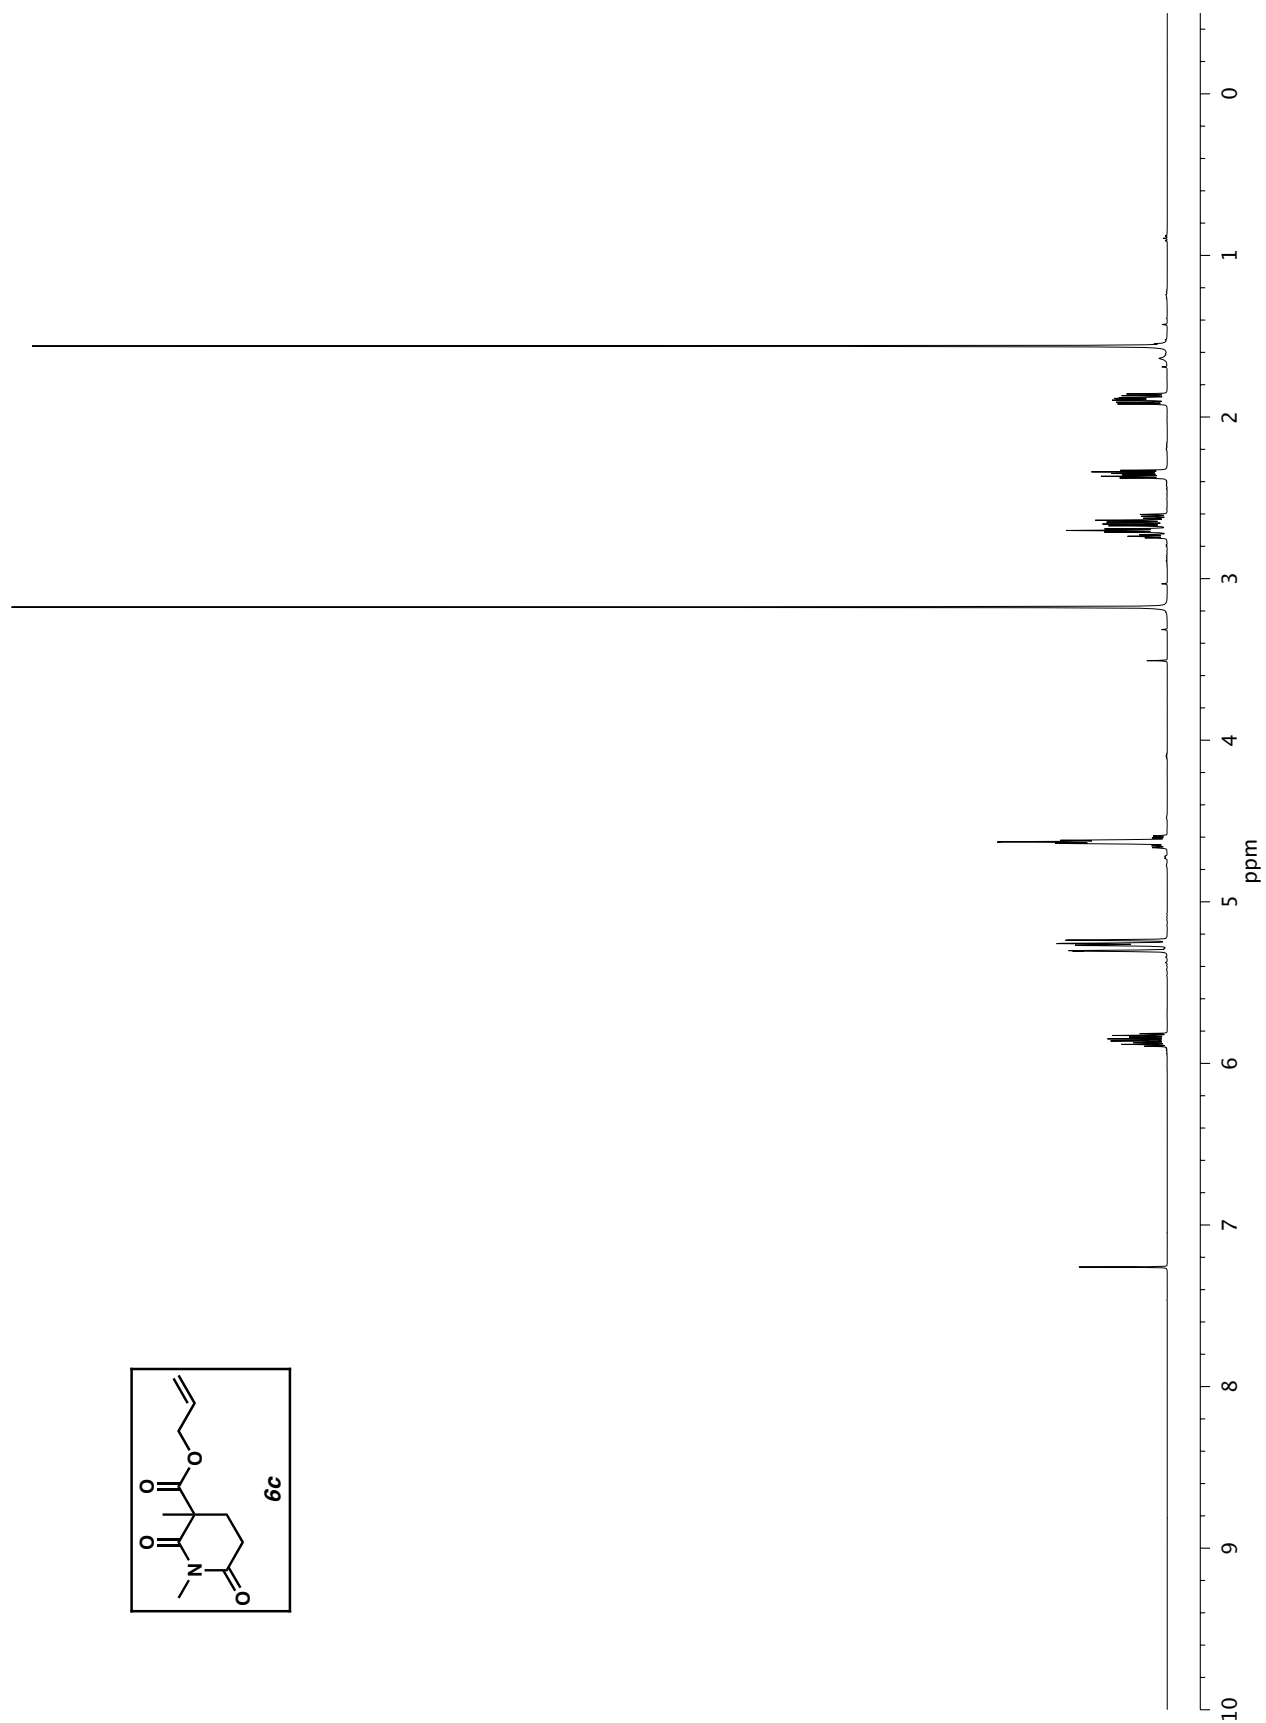

Figure SI-33A. <sup>1</sup>H NMR (500 MHz, CDCl<sub>3</sub>) of compound **6c**.



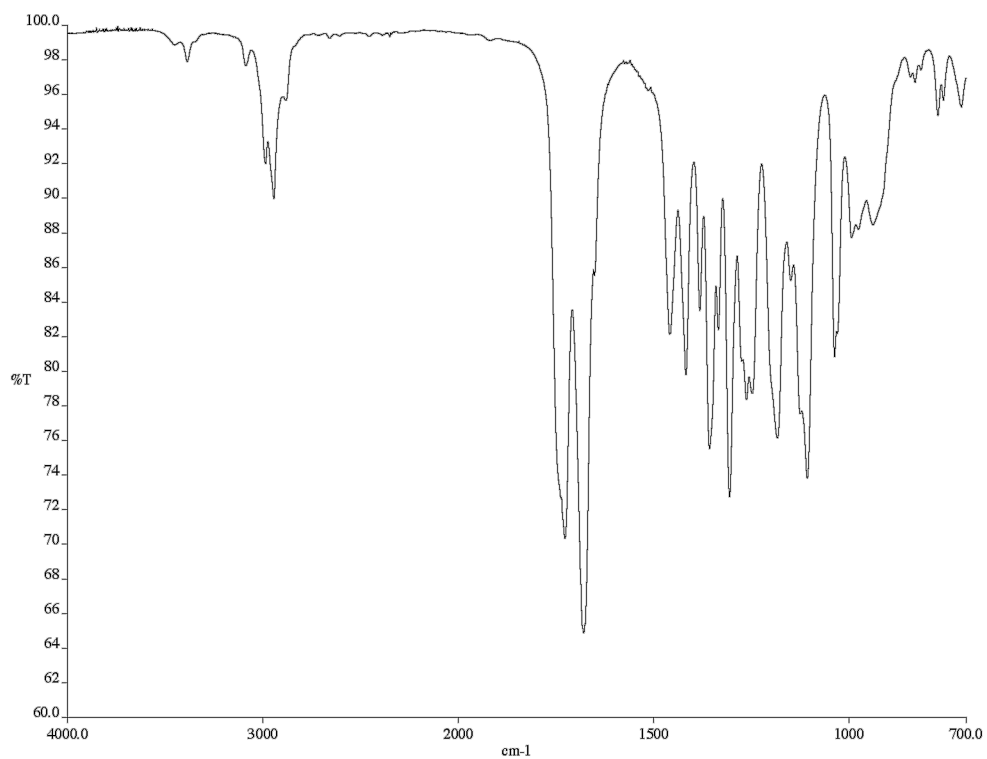

Figure SI-33B. Infrared spectrum (thin film/NaCl) of compound **6c**.

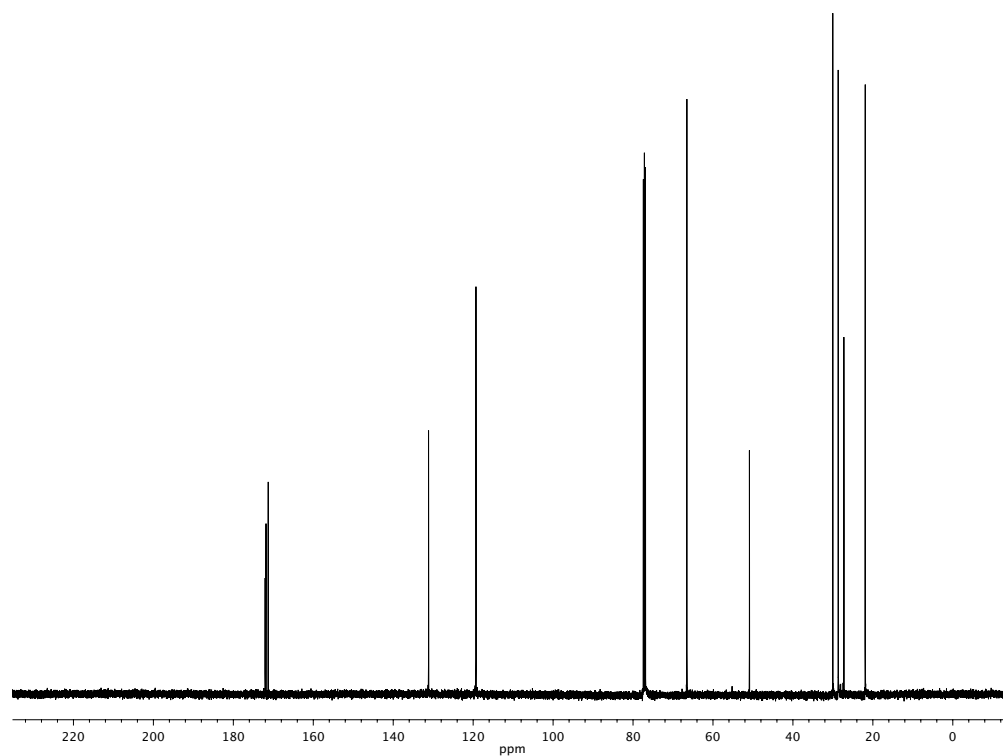

Figure SI-33C. <sup>13</sup>C NMR (125 MHz, CDCl<sub>3</sub>) of compound **6c**.

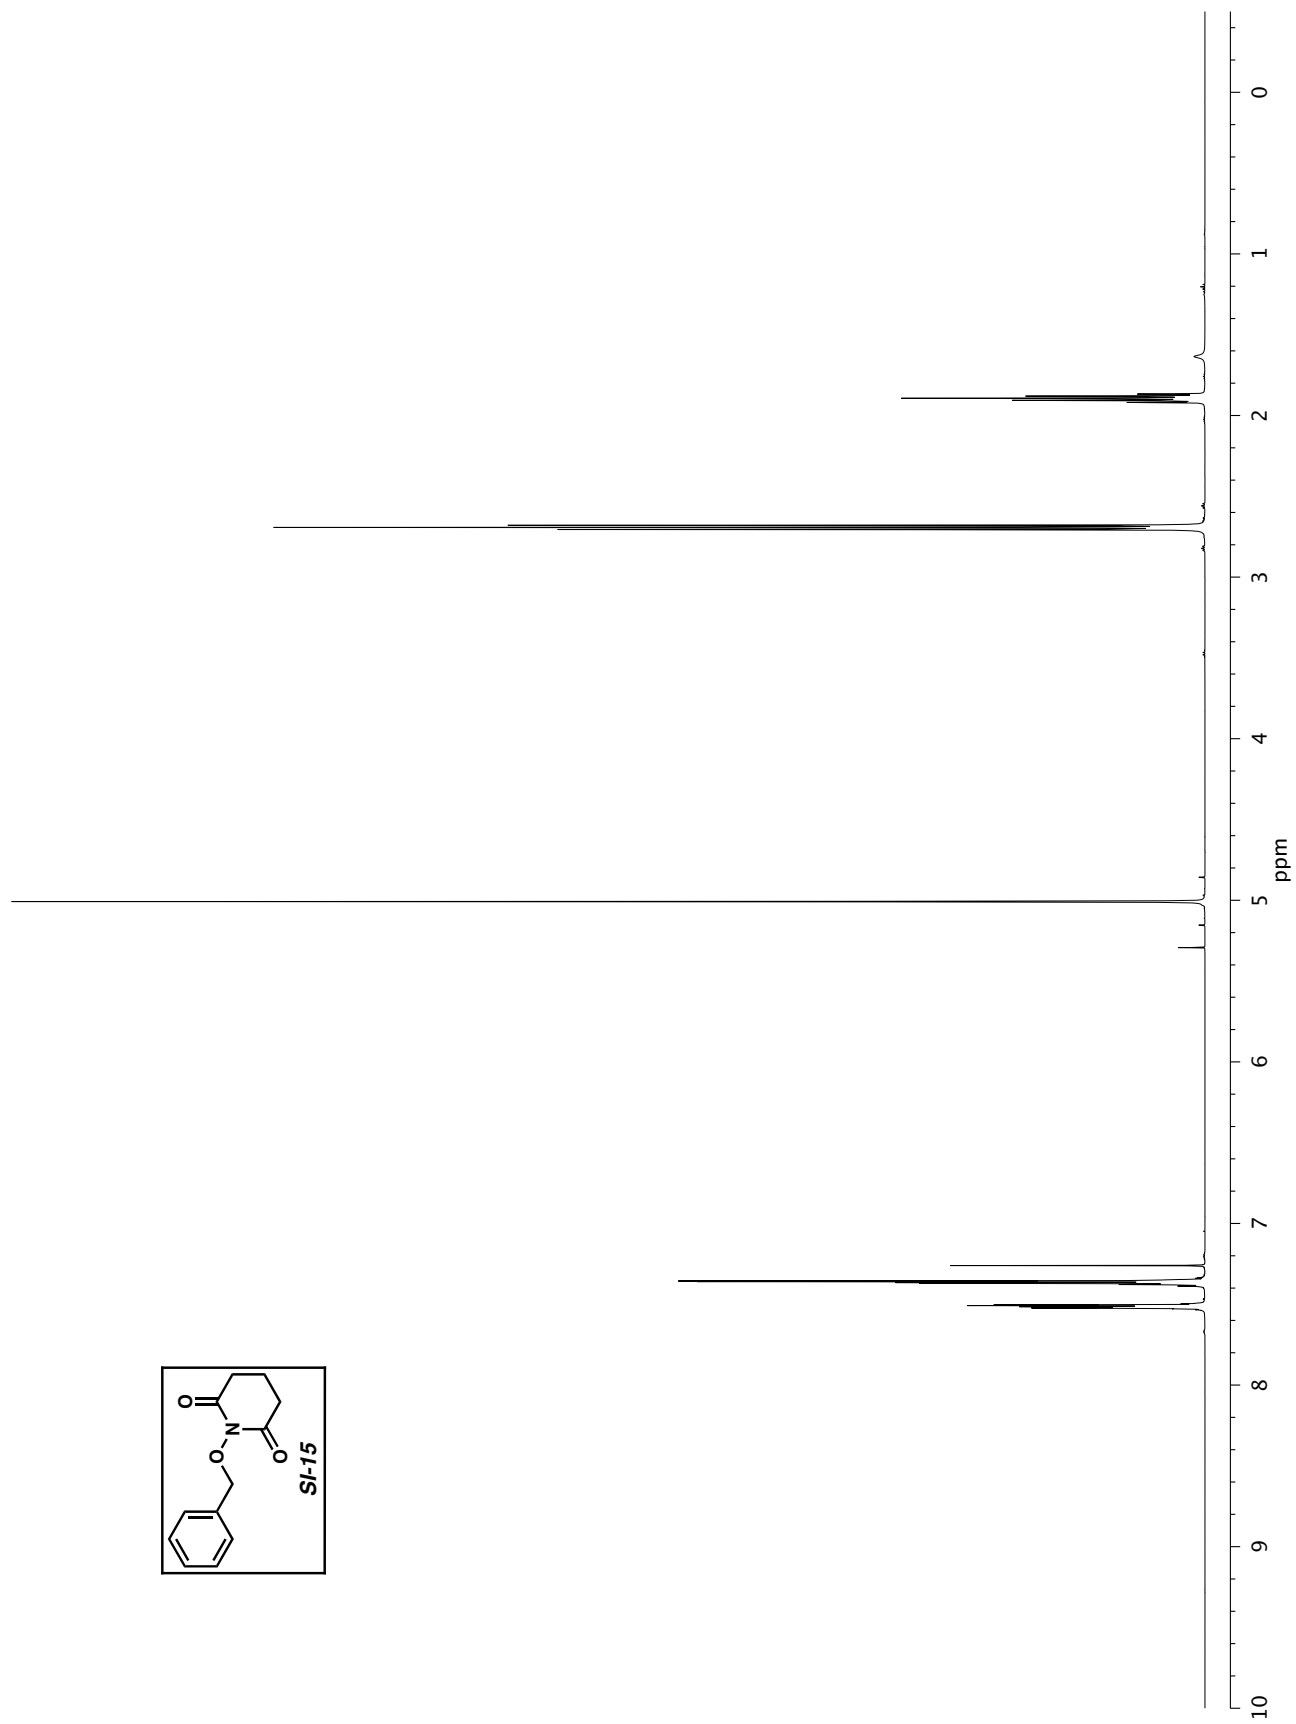

Figure SI-34A.  $^1\text{H}$  NMR (500 MHz,  $\text{CDCl}_3$ ) of compound SI-15.

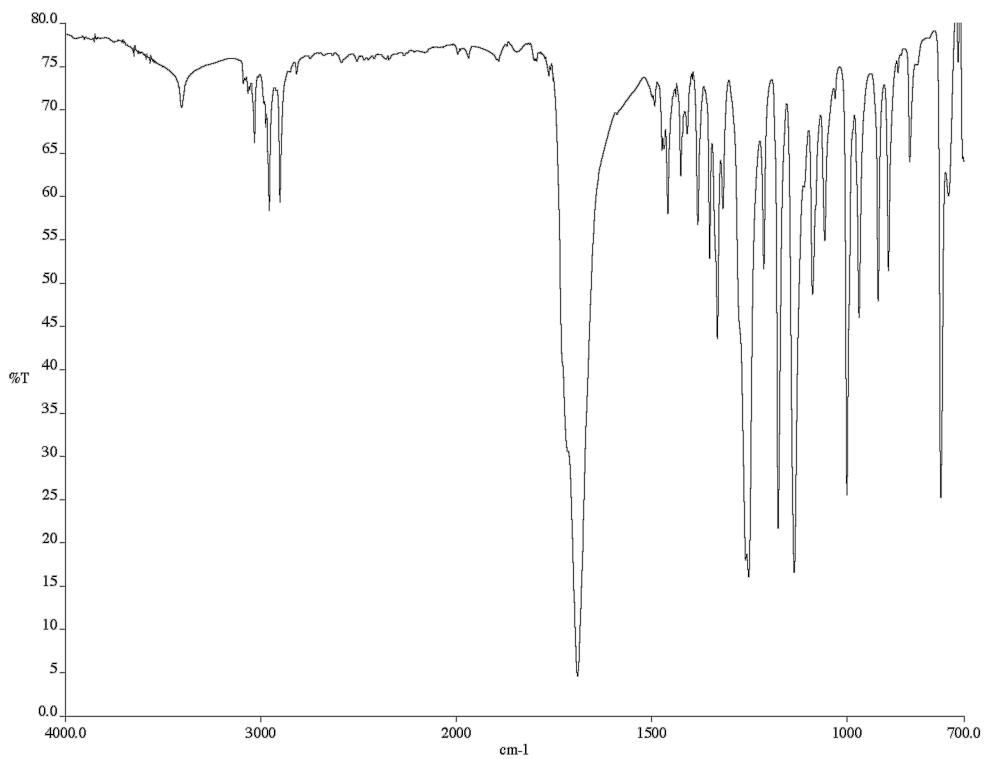

Figure SI-34B. Infrared spectrum (thin film/NaCl) of compound **SI-15**.

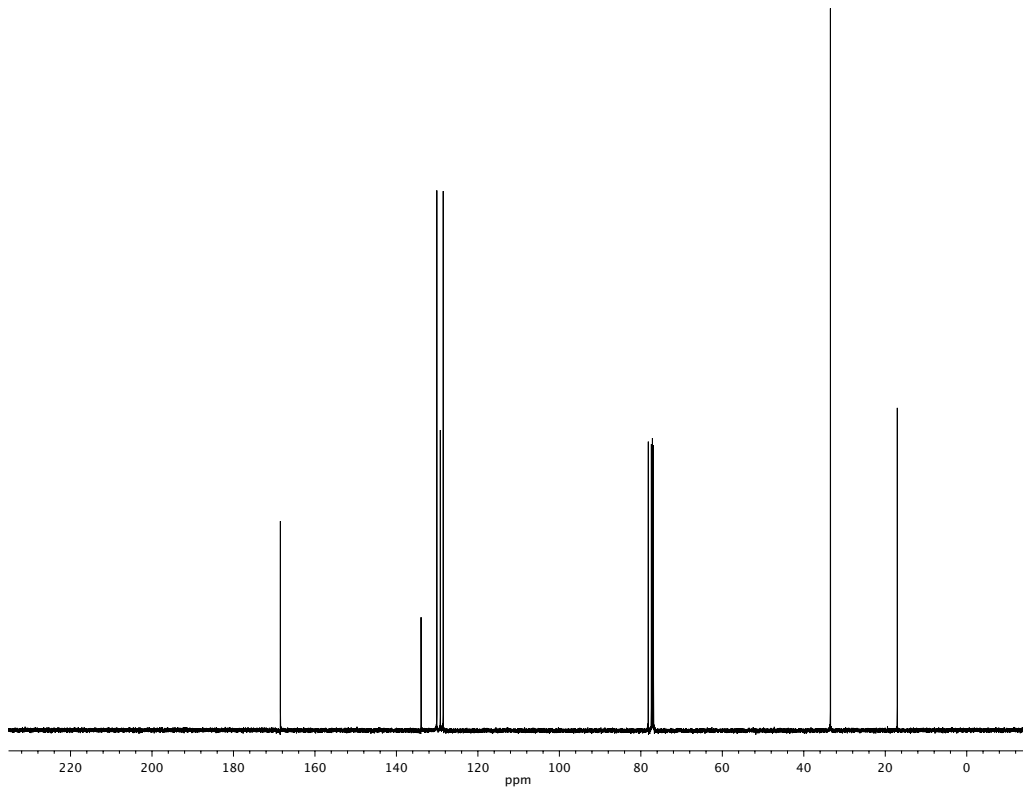

Figure SI-34C. <sup>13</sup>C NMR (125 MHz, CDCl<sub>3</sub>) of compound **SI-15**.

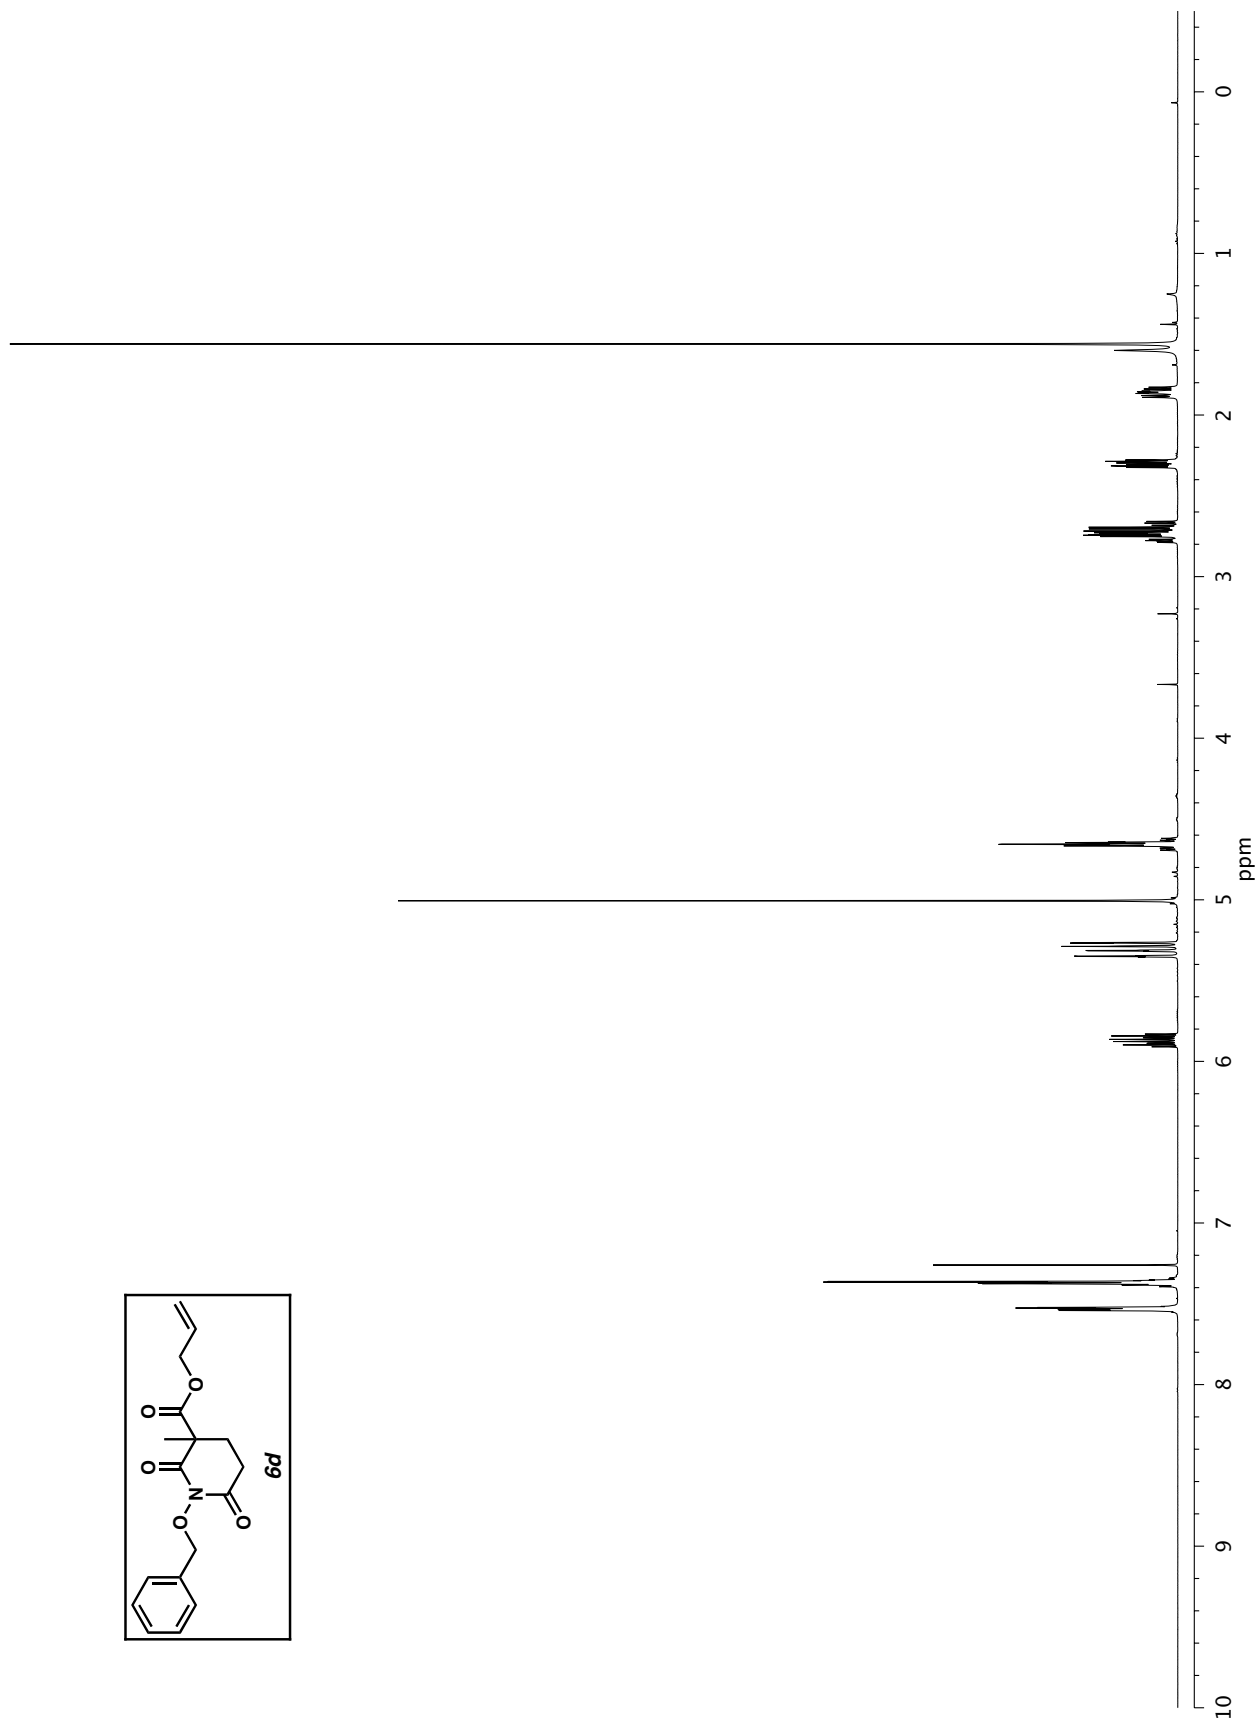Figure SI-35A.  $^1\text{H}$  NMR (500 MHz,  $\text{CDCl}_3$ ) of compound **6d**.

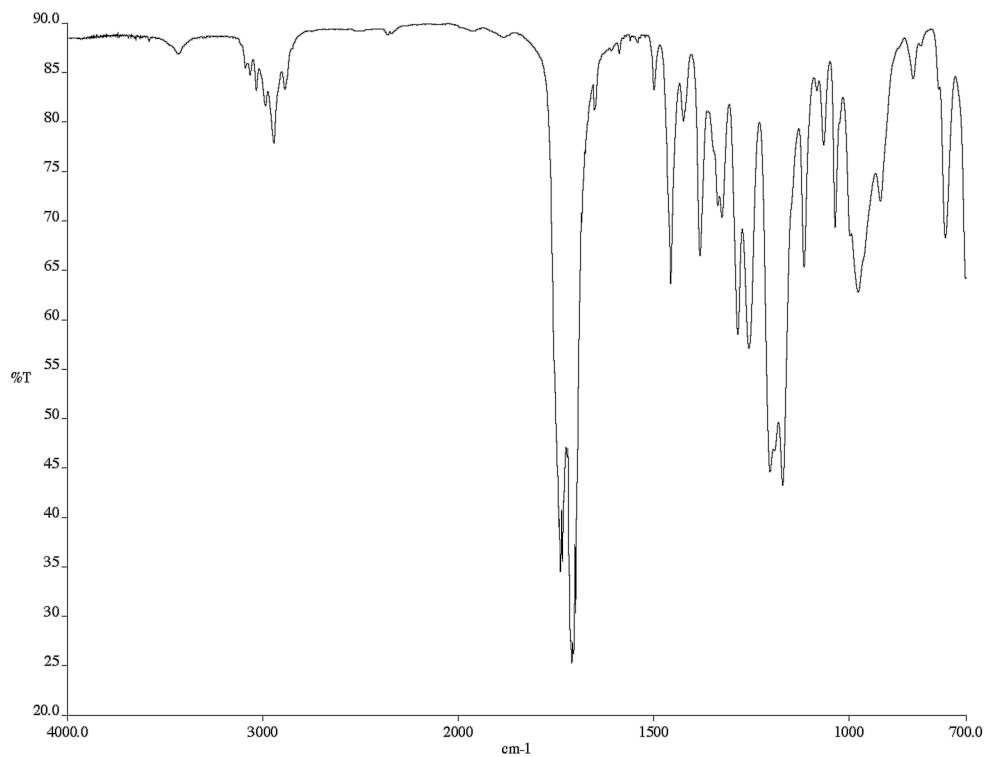

Figure SI-35B. Infrared spectrum (thin film/NaCl) of compound **6d**.

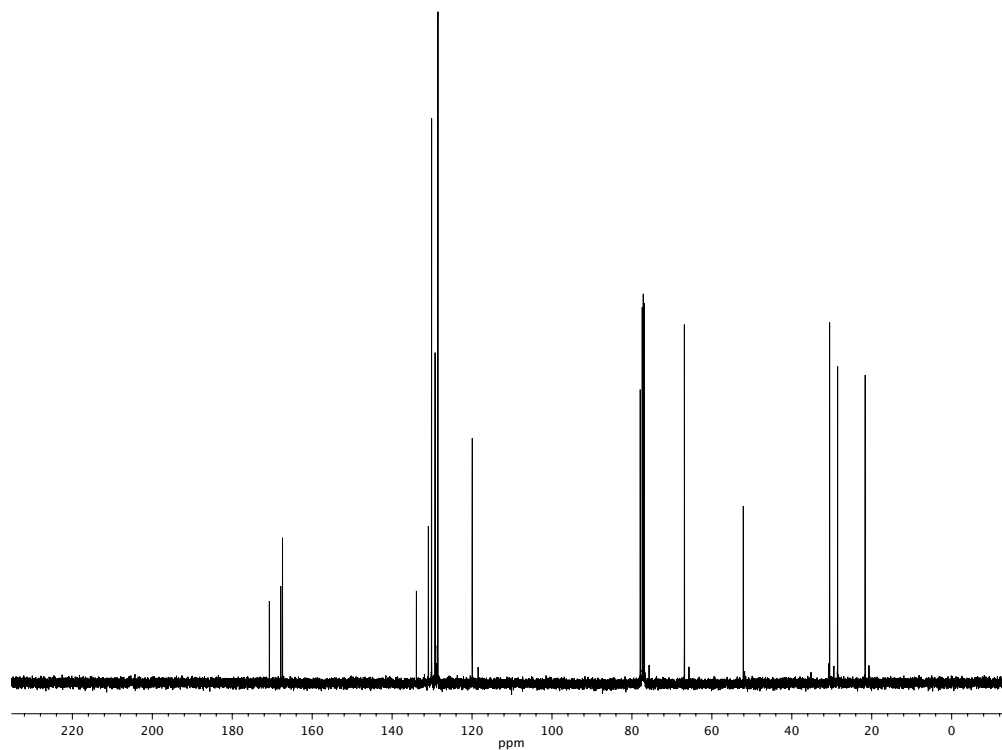

Figure SI-35C. <sup>13</sup>C NMR (125 MHz, CDCl<sub>3</sub>) of compound **6d**.

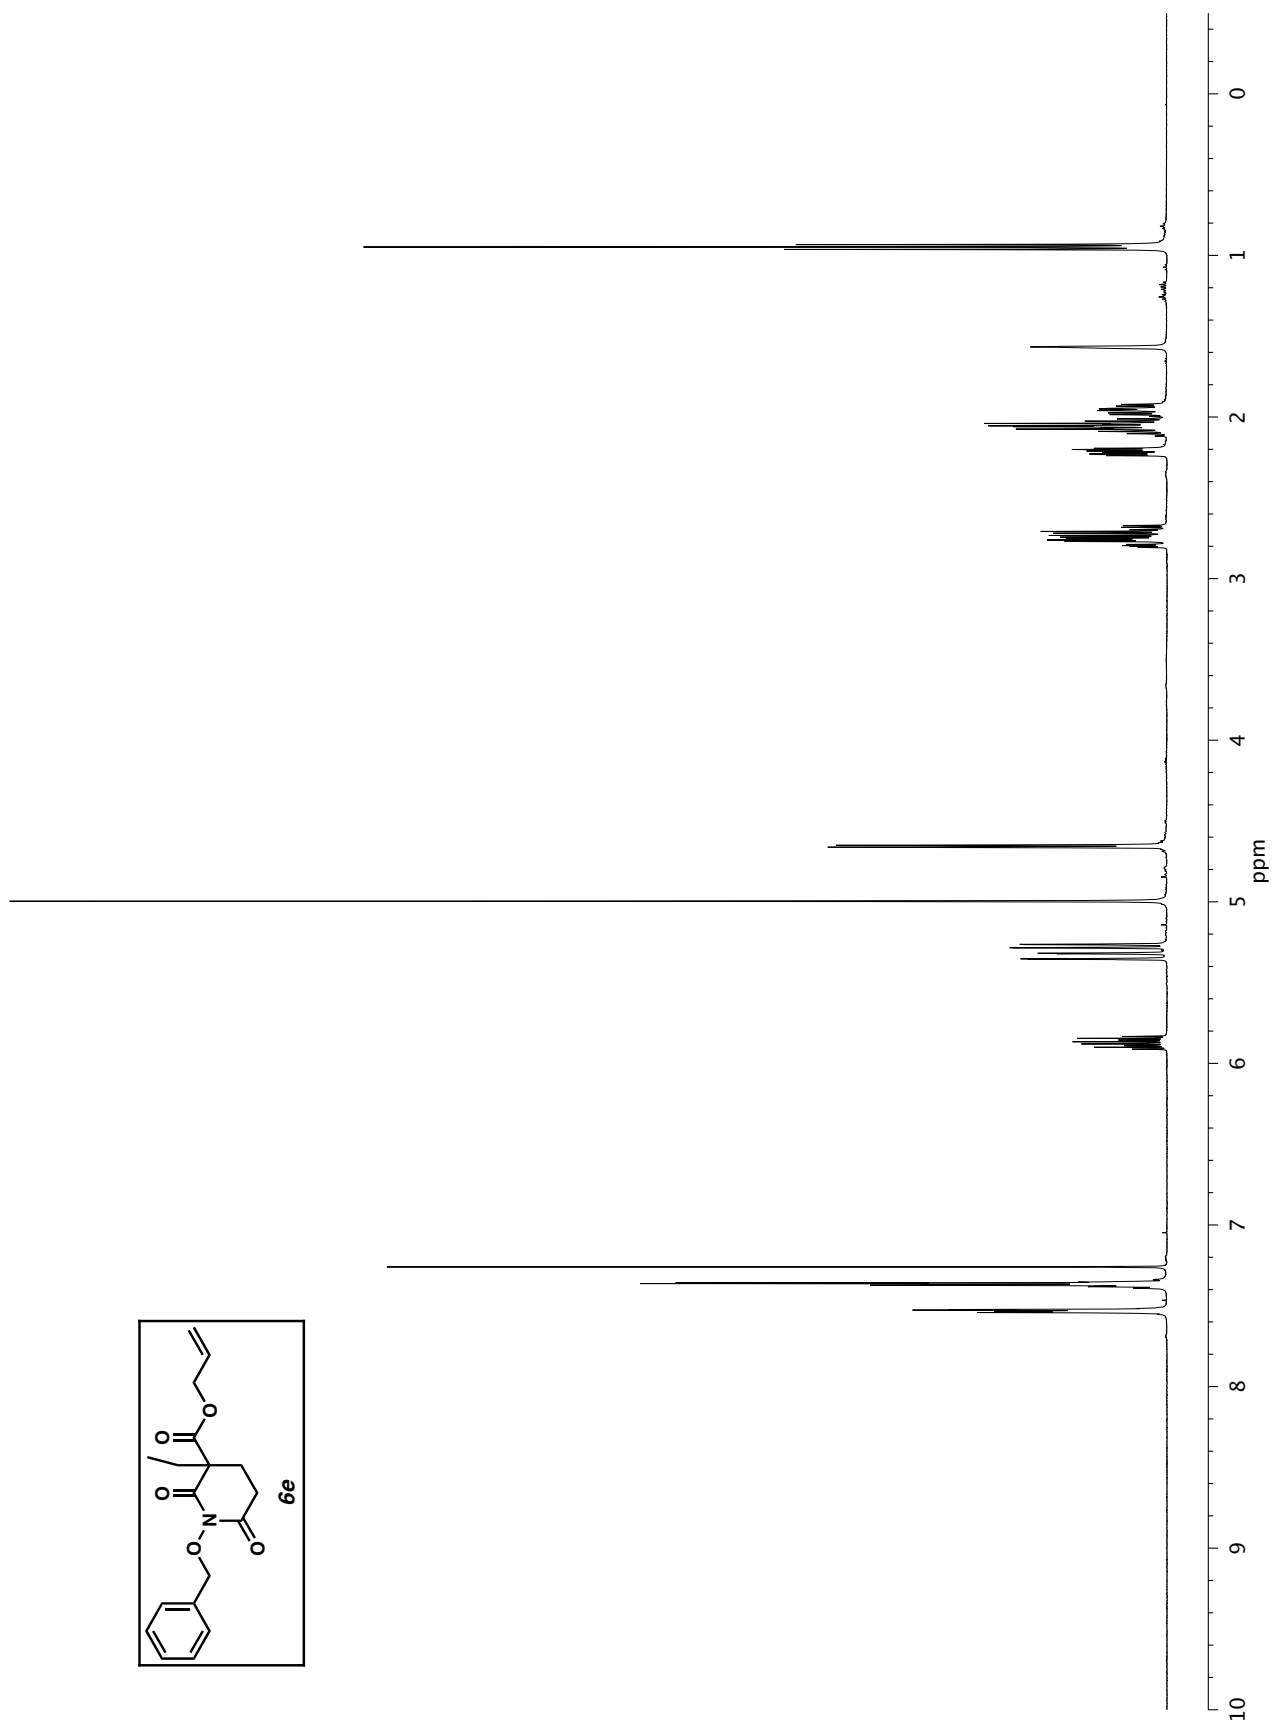

Figure SI-36A. <sup>1</sup>H NMR (500 MHz, CDCl<sub>3</sub>) of compound **6e**.

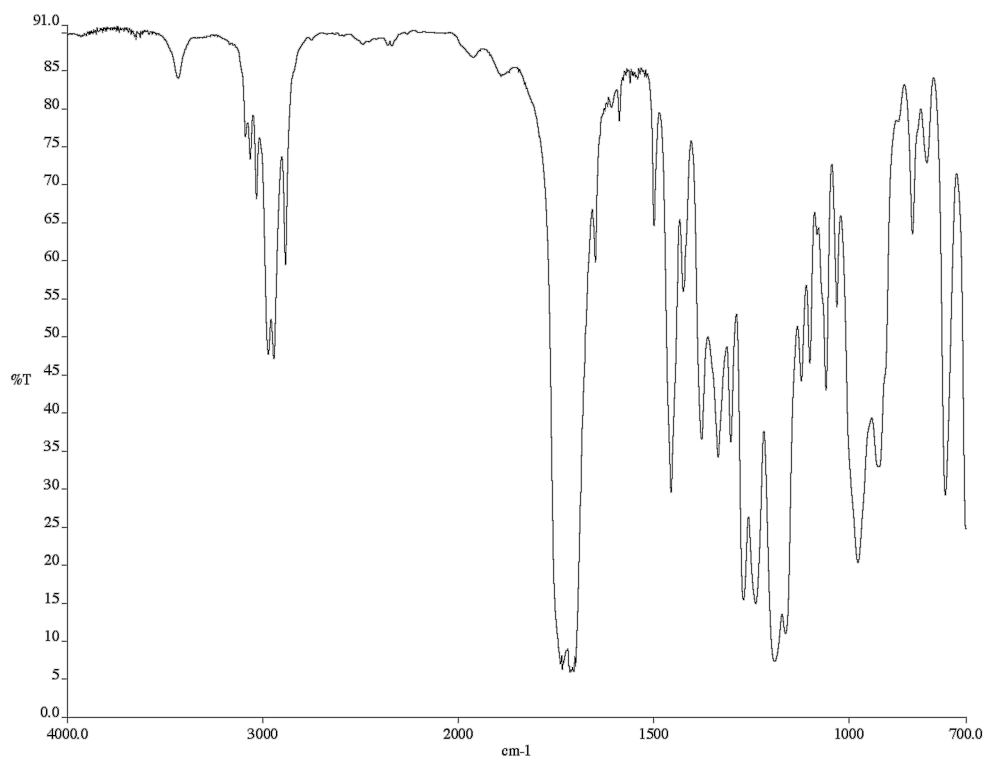

Figure SI-36B. Infrared spectrum (thin film/NaCl) of compound **6e**.

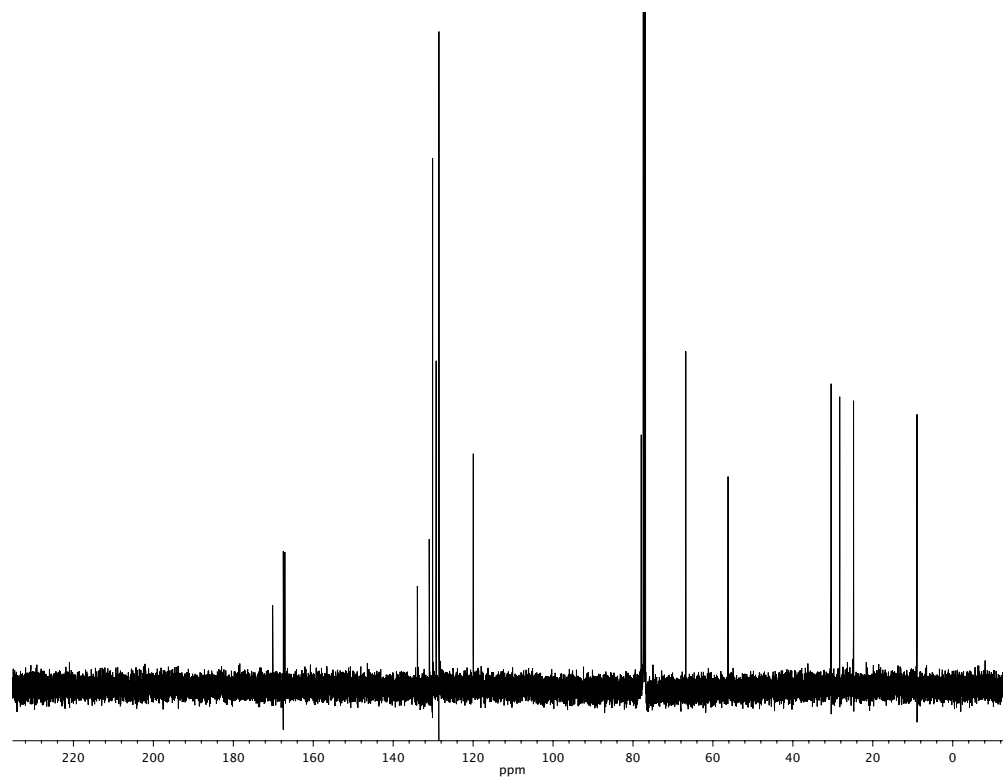

Figure SI-36C.  $^{13}\text{C}$  NMR (125 MHz,  $\text{CDCl}_3$ ) of compound **6e**.

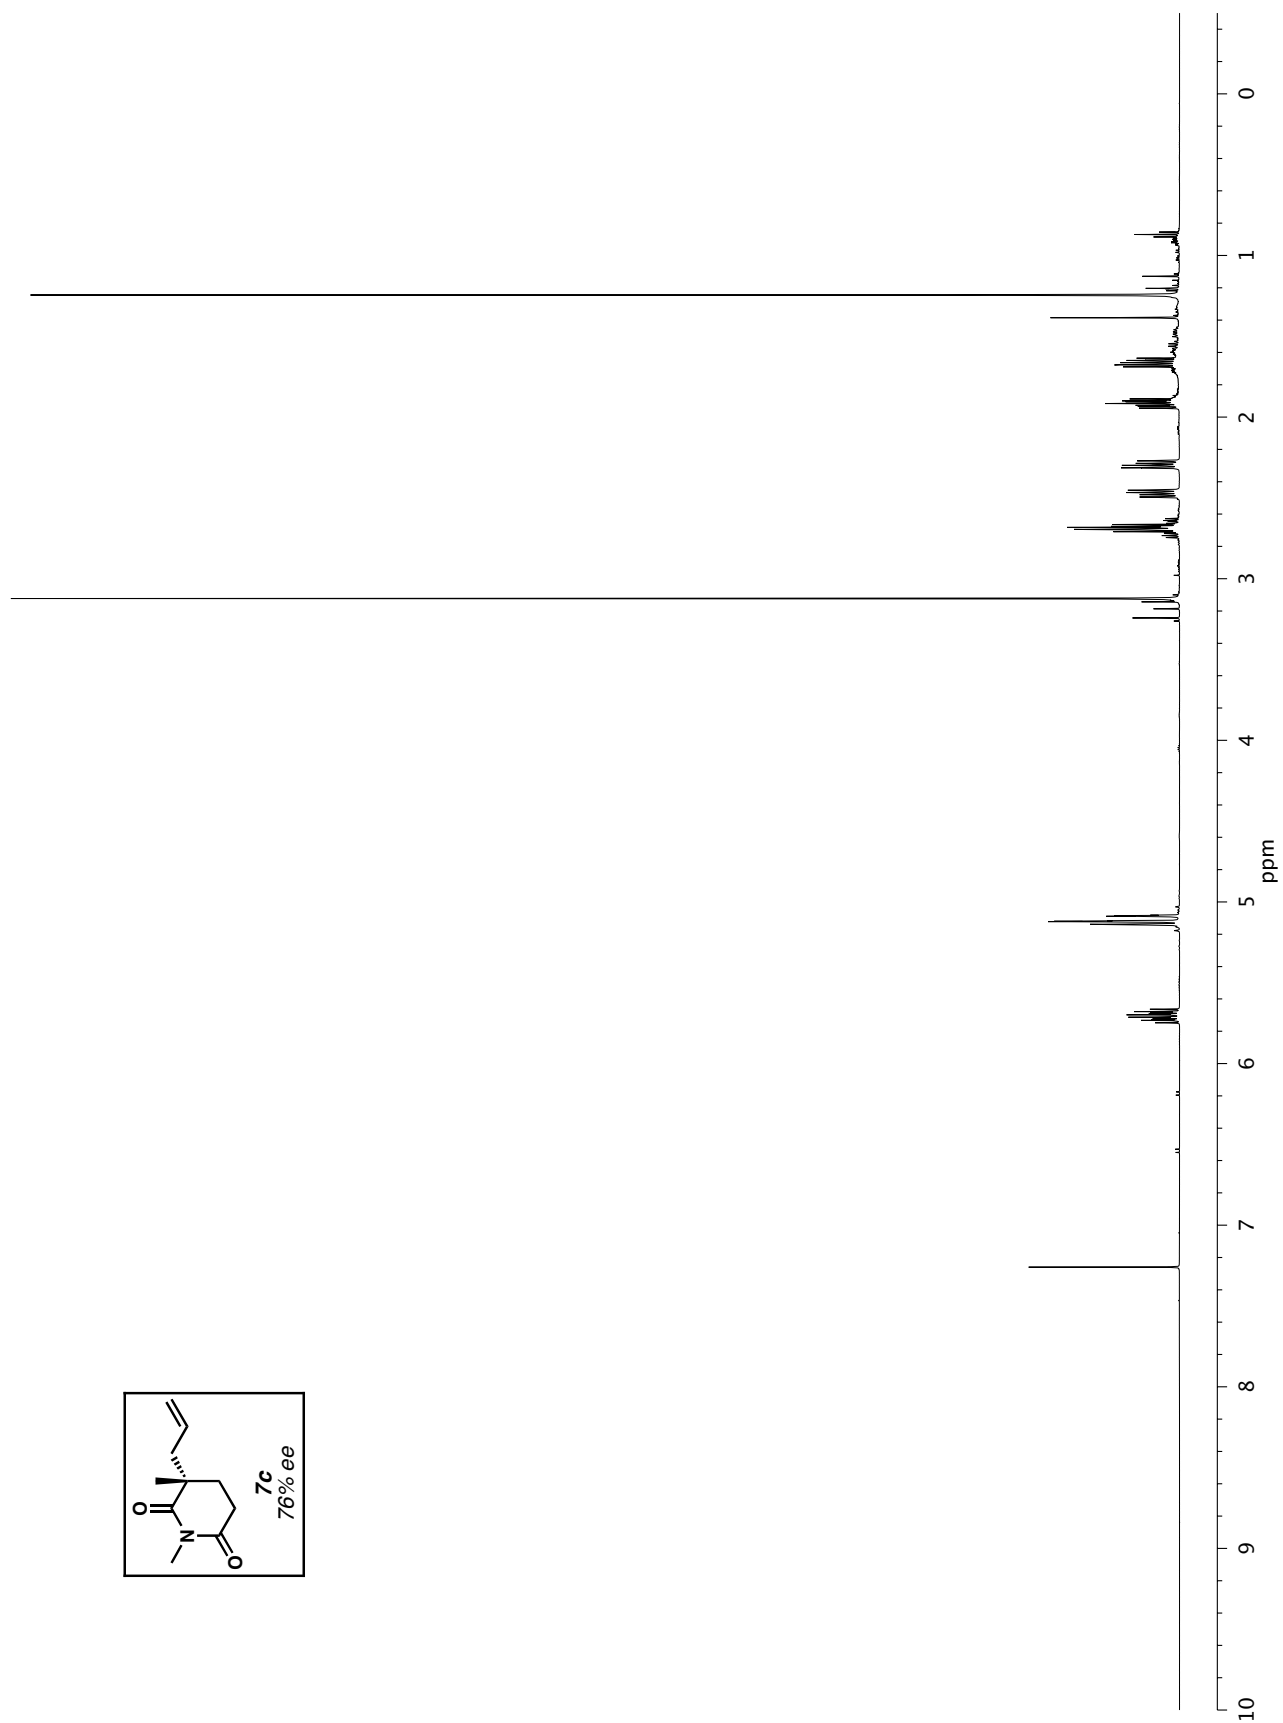Figure SI-37A.  $^1\text{H}$  NMR (500 MHz,  $\text{CDCl}_3$ ) of compound **7c**.



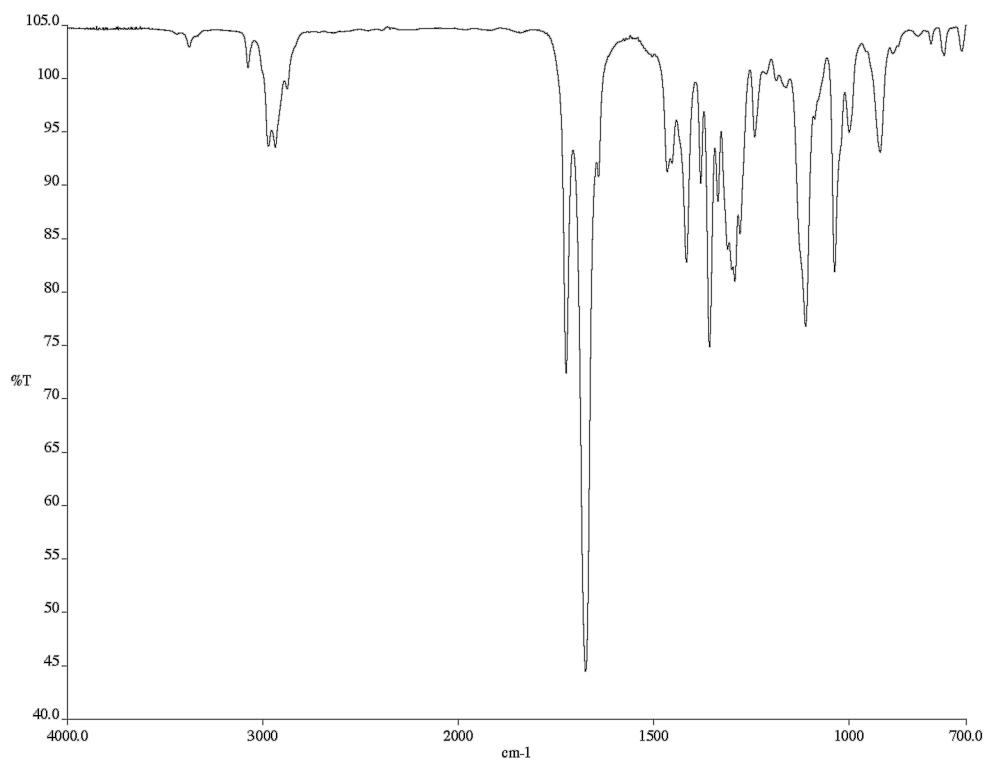

Figure SI-37B. Infrared spectrum (thin film/NaCl) of compound **7c**.

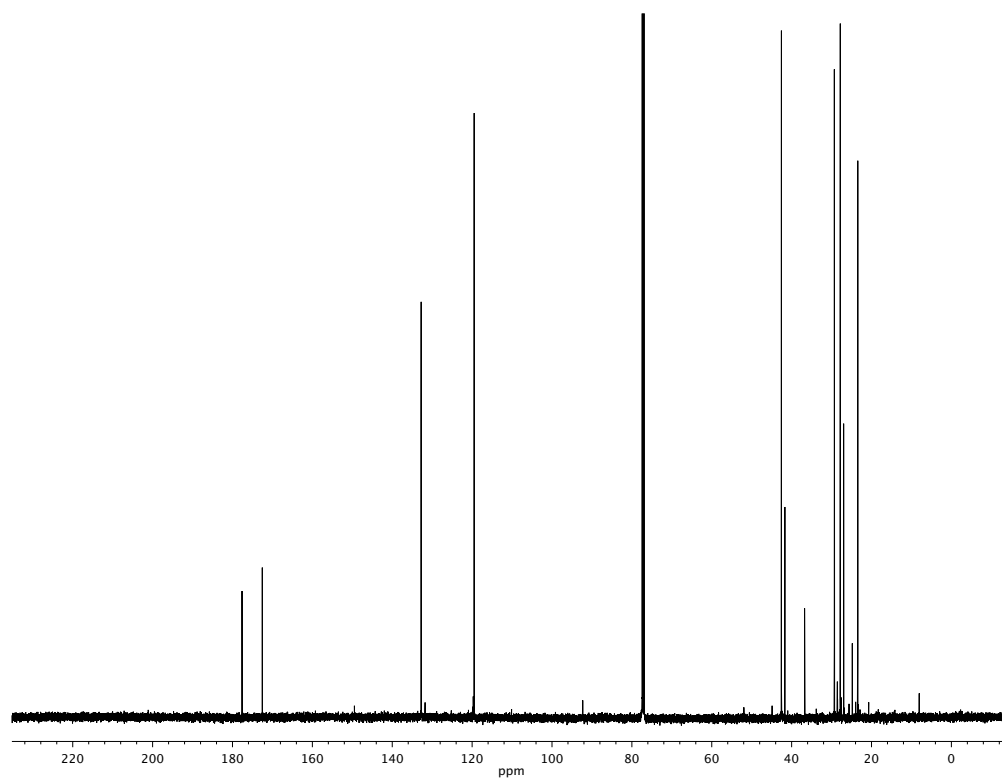

Figure SI-37C. <sup>13</sup>C NMR (125 MHz, CDCl<sub>3</sub>) of compound **7c**.

Data File C:\CHEM32\2\DATA\DCBIII\DCBIII\_125 2011-06-24 16-57-32\DCBIII\_125\_AD\_3IPAD.D  
 Sample Name: DCBIII\_125

```

=====
Acq. Operator   : DCB                               Seq. Line :   82
Acq. Instrument : HPLC 2                           Location  : Vial 61
Injection Date  : 6/25/2011 4:25:18 PM             Inj       :    1
                                                    Inj Volume: 5.0 µl
Different Inj Volume from Sequence !   Actual Inj Volume : 2.0 µl
Acq. Method    : C:\CHEM32\2\DATA\DCBIII\DCBIII_125 2011-06-24 16-57-32\3IPA30_210.M
Last changed   : 5/25/2010 1:18:17 PM by AYH
Analysis Method : C:\CHEM32\2\METHODS\2_5IPA30_254.M
Last changed   : 6/16/2011 8:10:28 PM by MBL
Method Info    : 2_5% IPA   30 min  254 nm  1 mL/min
=====
  
```

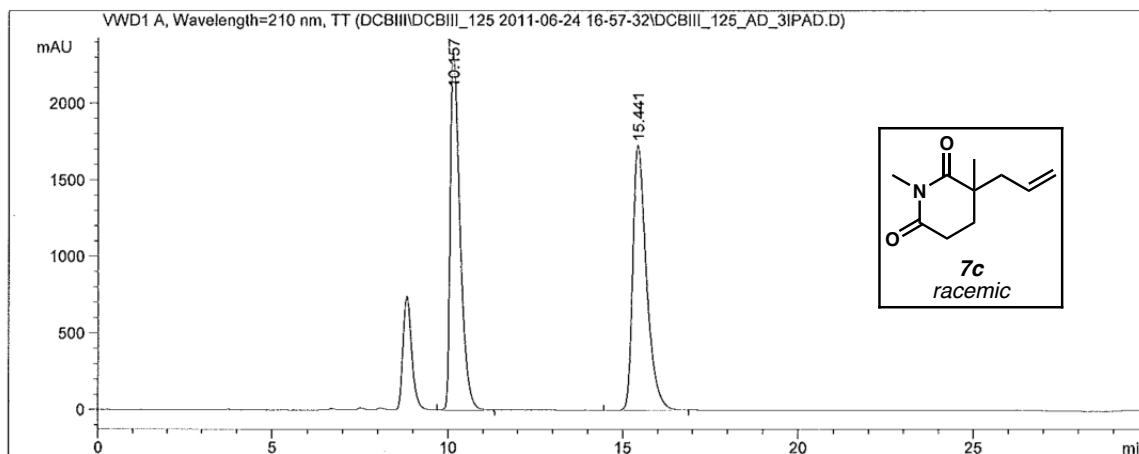

=====  
 Area Percent Report  
 =====

Sorted By : Signal  
 Multiplier: : 1.0000  
 Dilution: : 1.0000  
 Do not use Multiplier & Dilution Factor with ISTDs

Signal 1: VWD1 A, Wavelength=210 nm, TT

| Peak # | RetTime [min] | Type | Width [min] | Area mAU*s | Height [mAU] | Area %  |
|--------|---------------|------|-------------|------------|--------------|---------|
| 1      | 10.157        | VV   | 0.3006      | 4.59450e4  | 2315.91797   | 49.3261 |
| 2      | 15.441        | VB   | 0.4091      | 4.72005e4  | 1727.09167   | 50.6739 |

Totals : 9.31455e4 4043.00964

=====  
 Summed Peaks Report  
 =====

Signal 1: VWD1 A, Wavelength=210 nm, TT

Figure SI-37D. Chiral HPLC data of racemic compound **7c**.

Data File C:\CHEM32\2\DATA\DCBIII\DCBIII\_127 2011-07-20 12-04-45\DCBIII\_127\_AD\_3IPA.D  
 Sample Name: DCBIII\_127

```

=====
Acq. Operator   : DCB                               Seq. Line :    7
Acq. Instrument : HPLC 2                           Location  : Vial 62
Injection Date  : 7/20/2011 1:19:33 PM             Inj       :    1
                                                    Inj Volume: 5.0 µl

Acq. Method     : C:\CHEM32\2\DATA\DCBIII\DCBIII_127 2011-07-20 12-04-45\3IPA30 210.M
Last changed    : 5/25/2010 1:18:17 PM by AYH
Analysis Method : C:\CHEM32\2\METHODS\POS2.M
Last changed    : 7/20/2011 1:15:46 PM by JK
                  (modified after loading)
Method Info     : POSITION #2 METHOD : Valve to Position # 2 (Column # 1).
=====
  
```

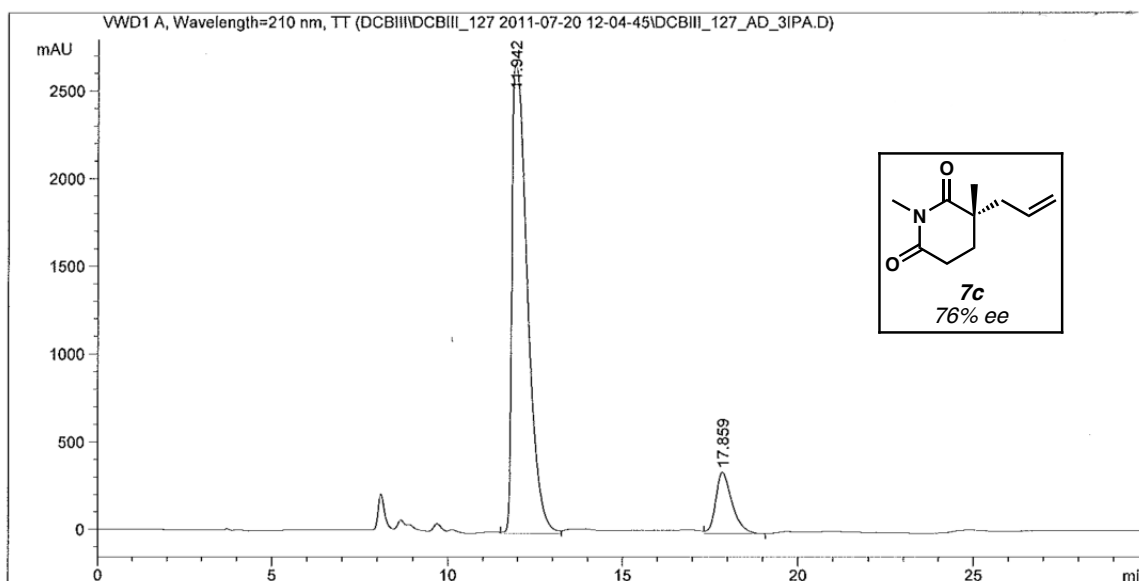

=====  
 Area Percent Report  
 =====

```

Sorted By      :      Signal
Multiplier:    :      1.0000
Dilution:      :      1.0000
Use Multiplier & Dilution Factor with ISTDs
  
```

Signal 1: VWD1 A, Wavelength=210 nm, TT

| Peak # | RetTime [min] | Type | Width [min] | Area mAU*s | Height [mAU] | Area %  |
|--------|---------------|------|-------------|------------|--------------|---------|
| 1      | 11.942        | VV   | 0.4660      | 8.26292e4  | 2679.66138   | 87.9644 |
| 2      | 17.859        | VV   | 0.4847      | 1.13056e4  | 349.93817    | 12.0356 |

Totals :                                    9.39348e4  3029.59955

Figure SI-37E. Chiral HPLC data of enantioenriched compound **7c**.

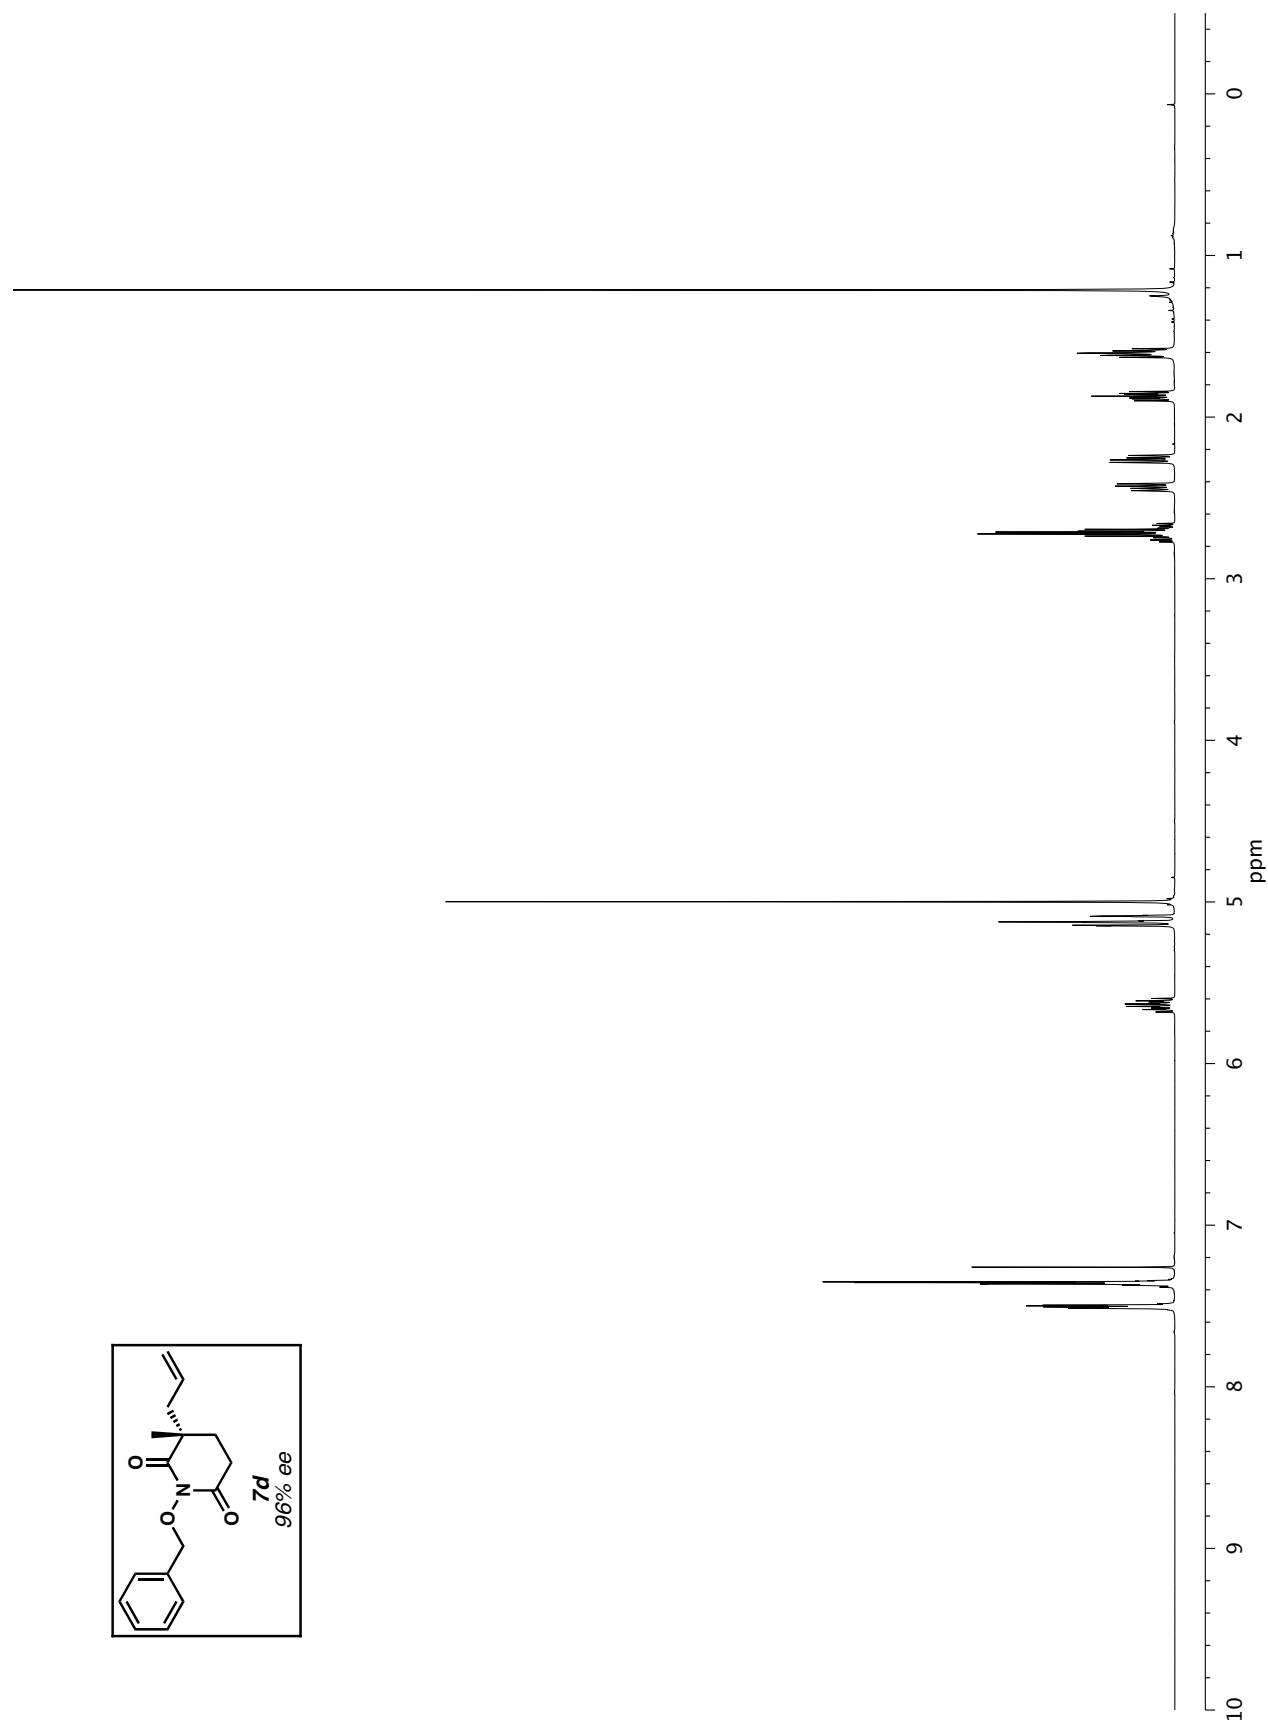Figure SI-38A.  $^1\text{H}$  NMR (500 MHz,  $\text{CDCl}_3$ ) of compound **7d**.

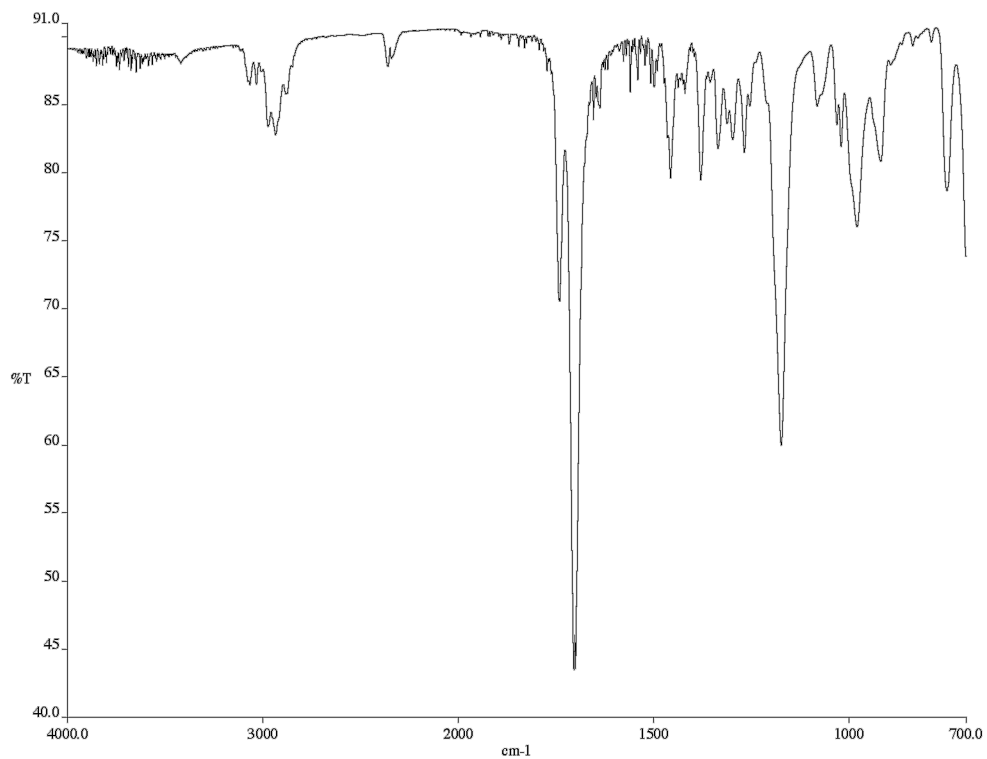

Figure SI-38B. Infrared spectrum (thin film/NaCl) of compound **7d**.

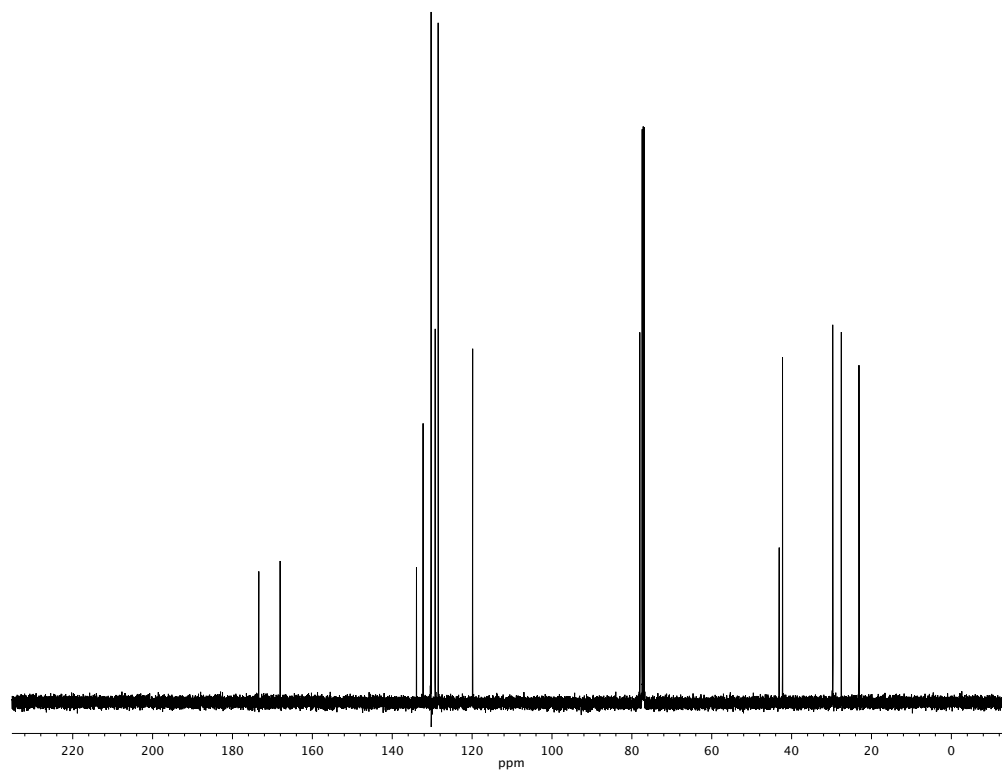

Figure SI-38C.  $^{13}\text{C}$  NMR (125 MHz,  $\text{CDCl}_3$ ) of compound **7d**.

Data File C:\CHEM32\1\DATA\JK\AHC 2012-01-12 16-17-40\JK-V-83-R.D  
Sample Name: JK-V-83-r

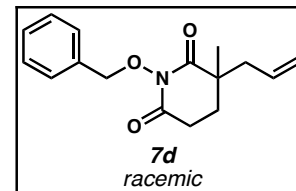

=====

|                                                                                                 |                    |
|-------------------------------------------------------------------------------------------------|--------------------|
| Acq. Operator : JK                                                                              | Seq. Line : 3      |
| Acq. Instrument : Instrument 1                                                                  | Location : P1-F-06 |
| Injection Date : 1/12/2012 4:26:00 PM                                                           | Inj : 1            |
|                                                                                                 | Inj Volume : 5 µl  |
| Acq. Method : C:\Chem32\1\DATA\JK\AHC 2012-01-12 16-17-40\S1C4 12MIN 5.M                        |                    |
| Last changed : 5/19/2011 8:57:55 PM by DCB                                                      |                    |
| Analysis Method : C:\CHEM32\1\DATA\JK\AHC 2012-01-12 16-17-40\JK-V-83-R.D\DA.M (S1C4 12MIN 5.M) |                    |
| Last changed : 5/19/2011 8:57:55 PM by DCB                                                      |                    |
| Method Info : S1C4 12min 5.M: 5% MeOH, OJ-H 3 mL/min, 12 min                                    |                    |

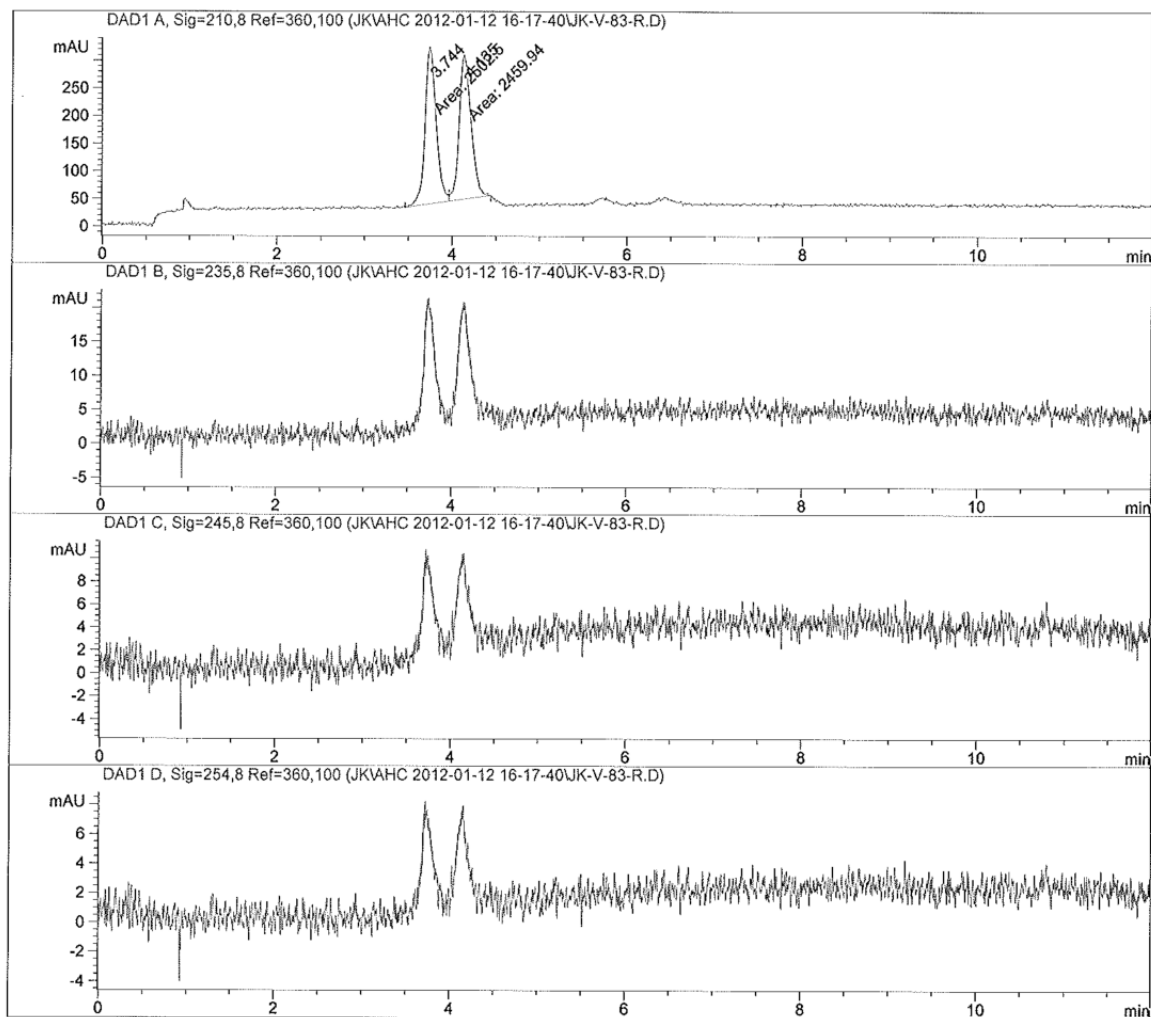

Figure SI-38D. Chiral SFC data of racemic compound **7d**.

Data File C:\CHEM32\1\DATA\JK\AHC 2012-01-12 16-17-40\JK-V-83-R.D  
 Sample Name: JK-V-83-r

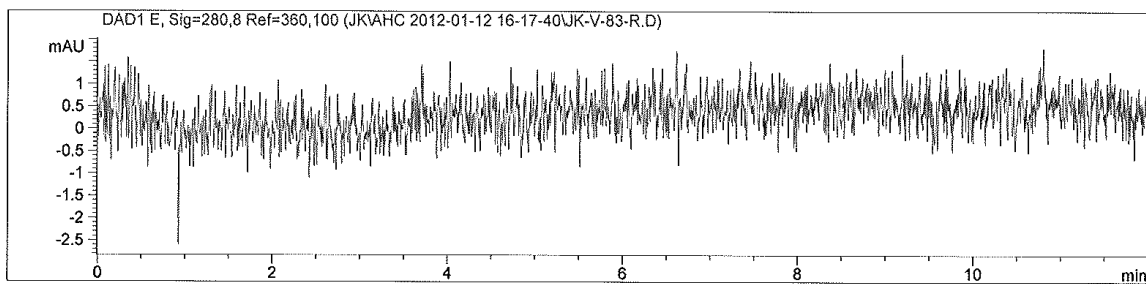

```
=====
                          Area Percent Report
=====
```

```
Sorted By      :      Signal
Multiplier     :      1.0000
Dilution      :      1.0000
Use Multiplier & Dilution Factor with ISTDs
```

Signal 1: DAD1 A, Sig=210,8 Ref=360,100

| Peak # | RetTime [min] | Type | Width [min] | Area [mAU*s] | Height [mAU] | Area %  |
|--------|---------------|------|-------------|--------------|--------------|---------|
| 1      | 3.744         | MF   | 0.1469      | 2502.50342   | 283.92230    | 50.4289 |
| 2      | 4.135         | FM   | 0.1584      | 2459.94043   | 258.85748    | 49.5711 |

```
Totals :                4962.44385  542.77979
```

Signal 2: DAD1 B, Sig=235,8 Ref=360,100

Signal 3: DAD1 C, Sig=245,8 Ref=360,100

Signal 4: DAD1 D, Sig=254,8 Ref=360,100

Signal 5: DAD1 E, Sig=280,8 Ref=360,100

```
=====
*** End of Report ***
```

Data File C:\CHEM32\1\DATA\JK\AHC 2012-01-12 16-17-40\JK-V-83-C.D  
 Sample Name: JK-V-83-c

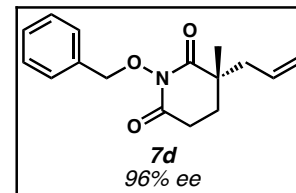

```

=====
Acq. Operator   : JK                               Seq. Line :    5
Acq. Instrument : Instrument 1                     Location  : P1-F-07
Injection Date  : 1/12/2012 4:42:28 PM           Inj       :    1
                                                    Inj Volume: 5 µl

Acq. Method     : C:\Chem32\1\DATA\JK\AHC 2012-01-12 16-17-40\S1C4 12MIN 5.M
Last changed    : 5/19/2011 8:57:55 PM by DCB
Analysis Method : C:\CHEM32\1\DATA\JK\AHC 2012-01-12 16-17-40\JK-V-83-C.D\DA.M (S1C4 12MIN
                    5.M)
Last changed    : 1/12/2012 4:59:04 PM by AHC
                    (modified after loading)
Method Info     : S1C4 12min 5.M: 5% MeOH, OJ-H 3 mL/min, 12 min
  
```

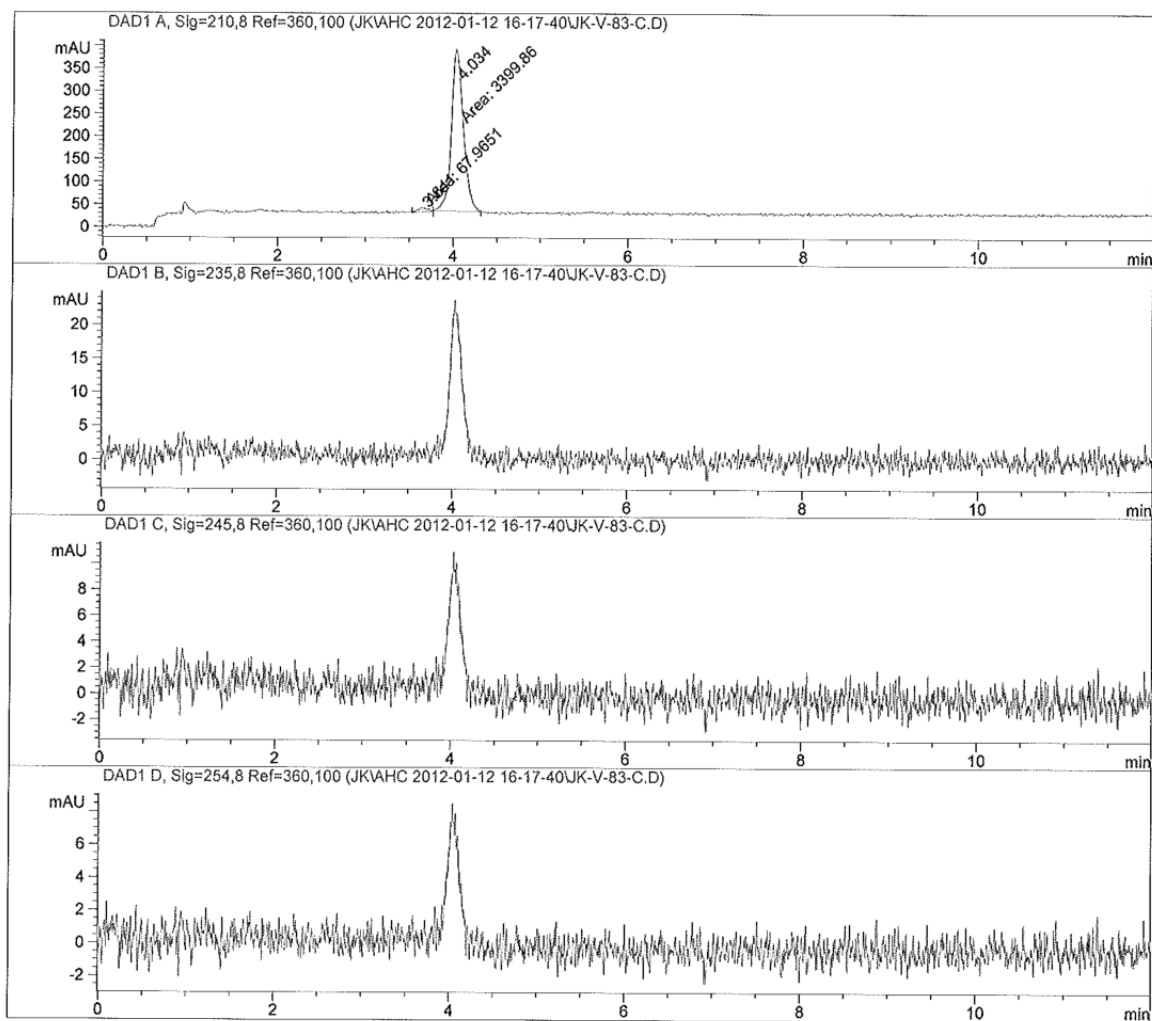

Figure SI-38E. Chiral SFC data of enantioenriched compound **7d**.



Data File C:\CHEM32\1\DATA\JK\AHC 2012-01-12 16-17-40\JK-V-83-C.D  
 Sample Name: JK-V-83-c

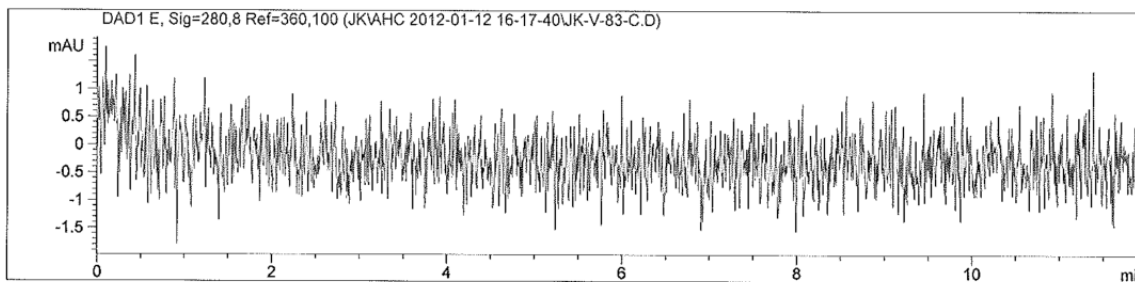

```
=====
                          Area Percent Report
=====
```

```
Sorted By      :      Signal
Multiplier     :      1.0000
Dilution      :      1.0000
Use Multiplier & Dilution Factor with ISTDs
```

Signal 1: DAD1 A, Sig=210,8 Ref=360,100

| Peak # | RetTime [min] | Type | Width [min] | Area [mAU*s] | Height [mAU] | Area %  |
|--------|---------------|------|-------------|--------------|--------------|---------|
| 1      | 3.641         | MM   | 0.1183      | 67.96515     | 9.57130      | 1.9599  |
| 2      | 4.034         | MM   | 0.1586      | 3399.85913   | 357.17441    | 98.0401 |

Totals :                    3467.82428   366.74571

Signal 2: DAD1 B, Sig=235,8 Ref=360,100

Signal 3: DAD1 C, Sig=245,8 Ref=360,100

Signal 4: DAD1 D, Sig=254,8 Ref=360,100

Signal 5: DAD1 E, Sig=280,8 Ref=360,100

```
=====
*** End of Report ***
```

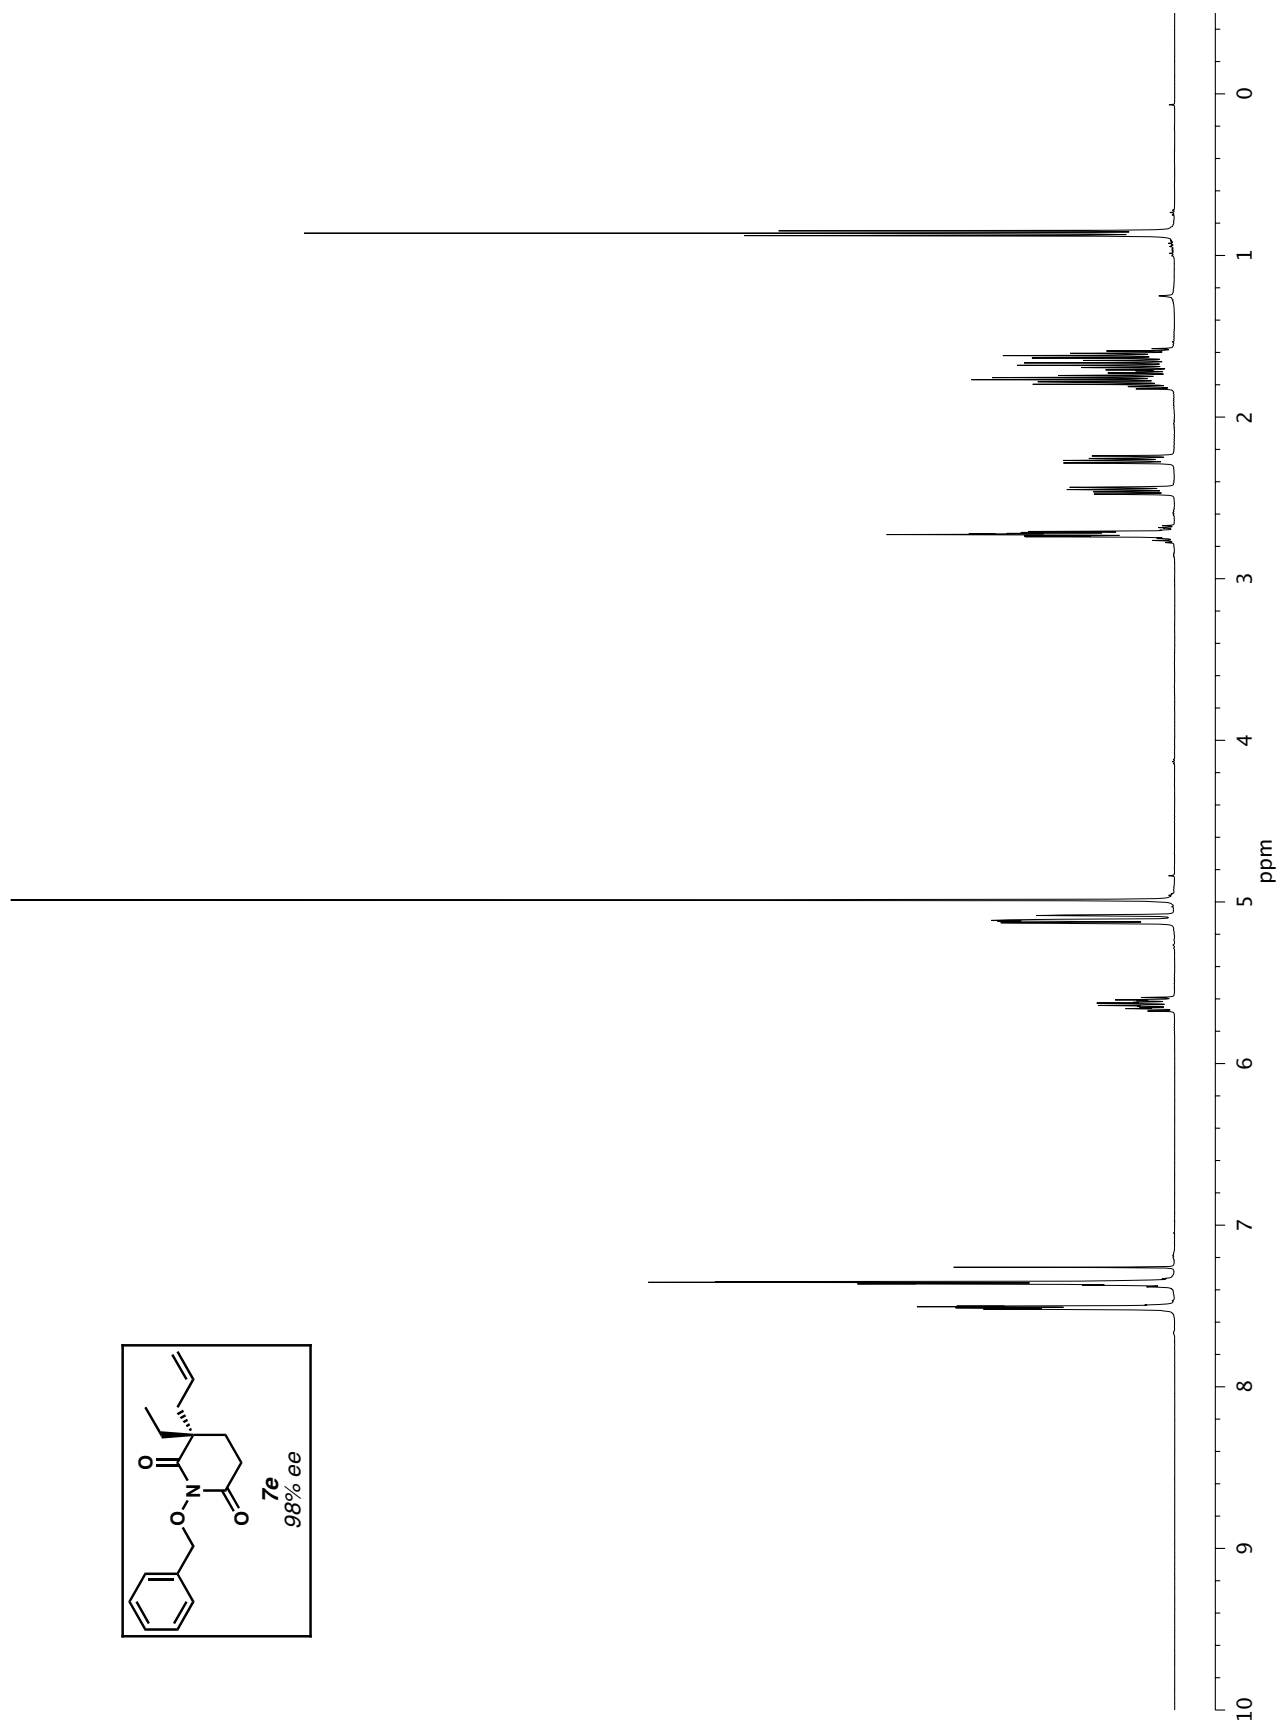Figure SI-39A.  $^1\text{H}$  NMR (500 MHz,  $\text{CDCl}_3$ ) of compound **7e**.

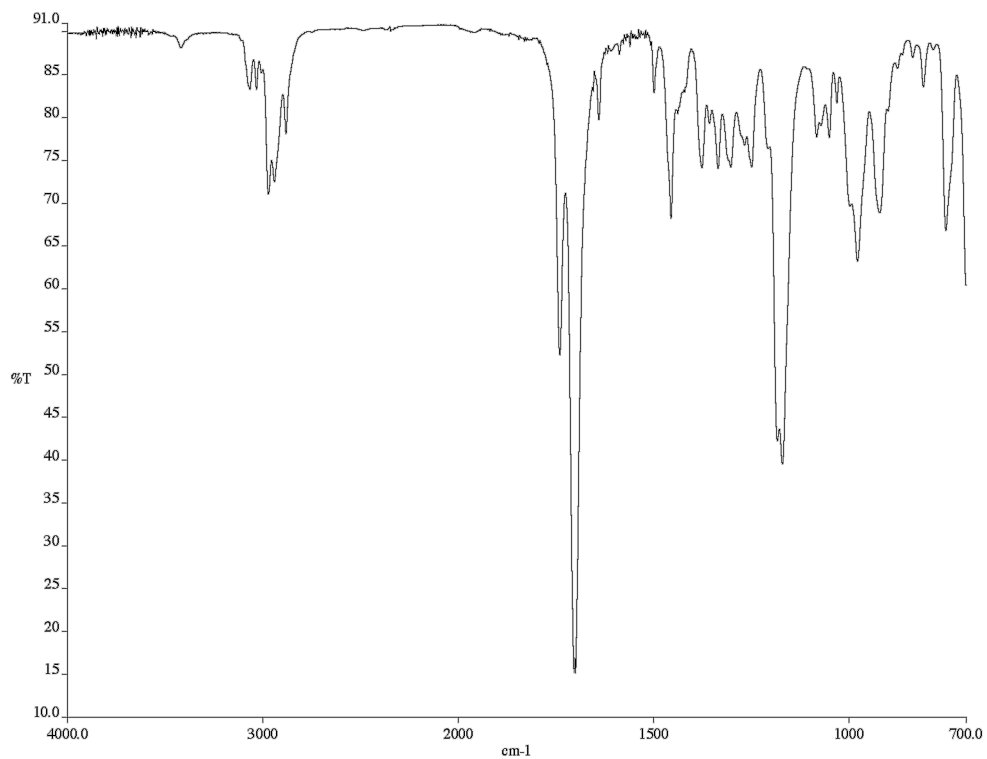

Figure SI-39B. Infrared spectrum (thin film/NaCl) of compound **7e**.

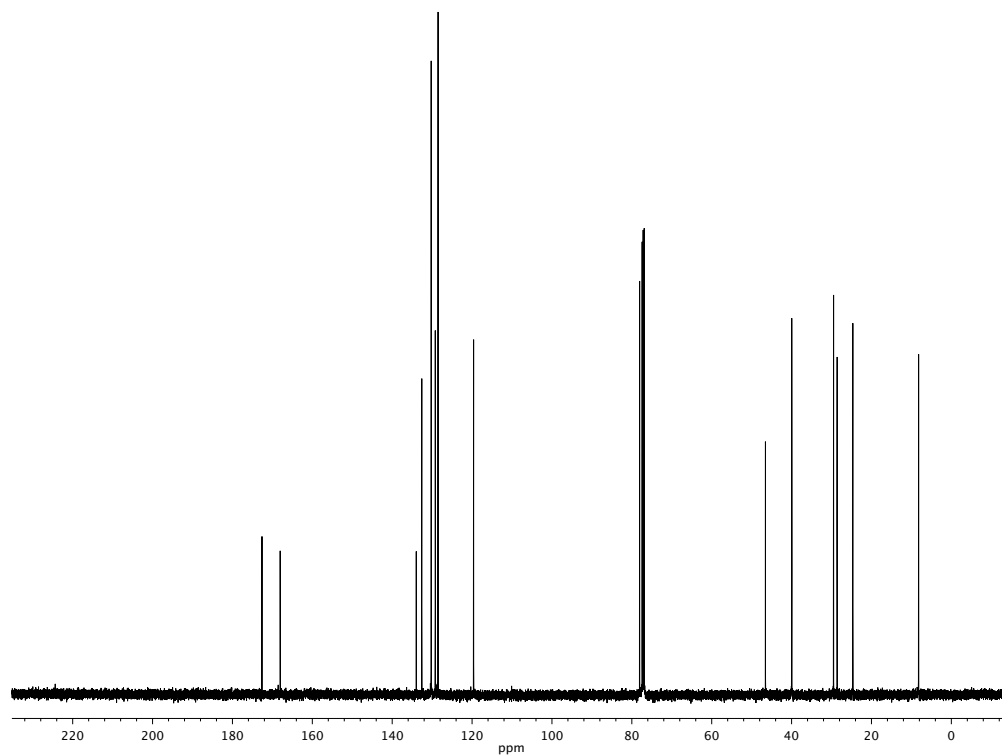

Figure SI-39C. <sup>13</sup>C NMR (125 MHz, CDCl<sub>3</sub>) of compound **7e**.

Data File C:\CHEM32\1\DATA\JK\ADL 2012-01-13 17-32-43\JK-V-93-RACEMIC.D  
 Sample Name: JK-V-93-racemic

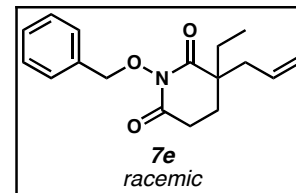

```

=====
Acq. Operator   : JK                               Seq. Line :    2
Acq. Instrument : Instrument 1                     Location  : P1-B-01
Injection Date  : 1/13/2012 5:36:44 PM           Inj       :    1
                                                    Inj Volume: 5 µl
Different Inj Volume from Sequence ! Actual Inj Volume : 10 µl
Acq. Method     : C:\Chem32\1\DATA\JK\ADL 2012-01-13 17-32-43\S1C6 20MIN1.M
Last changed    : 1/13/2012 4:24:23 PM by JK
Analysis Method : C:\CHEM32\1\DATA\JK\ADL 2012-01-13 17-32-43\JK-V-93-RACEMIC.D\DA.M (S1C6
                20MIN1.M)
Last changed    : 1/15/2012 10:45:33 AM by JK
Method Info     : S1C6 20min1.M: 1% MeOH, OB-H 2.5 mL/min, 20 min
=====
  
```

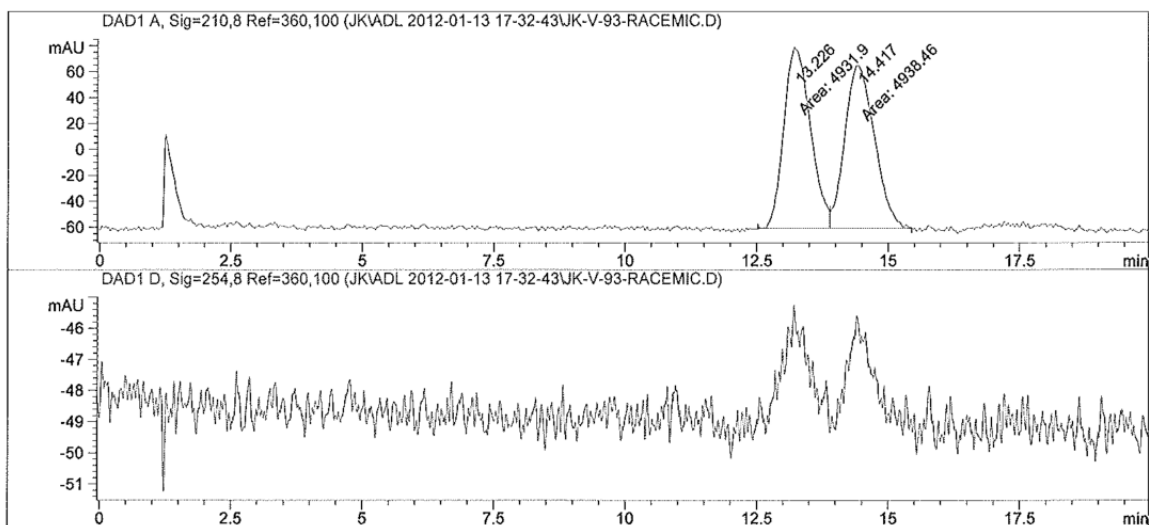

=====  
 Area Percent Report  
 =====

```

Sorted By      :      Signal
Multiplier     :      1.0000
Dilution      :      1.0000
Use Multiplier & Dilution Factor with ISTDs
  
```

Signal 1: DAD1 A, Sig=210,8 Ref=360,100

| Peak # | RetTime [min] | Type | Width [min] | Area [mAU*s] | Height [mAU] | Area %  |
|--------|---------------|------|-------------|--------------|--------------|---------|
| 1      | 13.226        | MF   | 0.5903      | 4931.90381   | 139.24123    | 49.9668 |
| 2      | 14.417        | FM   | 0.6560      | 4938.46289   | 125.45995    | 50.0332 |

Totals :                                    9870.36670   264.70118

*Figure SI-39D. Chiral SFC data of racemic compound 7e.*

Data File C:\CHEM32\1\DATA\JK\ADL 2012-01-13 17-32-43\JK-V-93-CHIRAL.D  
 Sample Name: JK-V-93-chiral

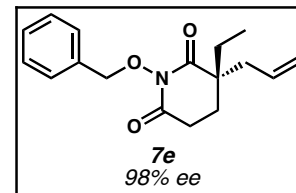

```

=====
Acq. Operator   : JK                               Seq. Line :    5
Acq. Instrument : Instrument 1                     Location  : P1-C-01
Injection Date  : 1/13/2012 6:03:35 PM           Inj       :    1
                                                    Inj Volume: 5 µl
Different Inj Volume from Sequence ! Actual Inj Volume : 10 µl
Acq. Method     : C:\Chem32\1\DATA\JK\ADL 2012-01-13 17-32-43\S1C6 20MIN1.M
Last changed    : 1/13/2012 4:24:23 PM by JK
Analysis Method : C:\CHEM32\1\DATA\JK\ADL 2012-01-13 17-32-43\JK-V-93-CHIRAL.D\DA.M (S1C6
                20MIN1.M)
Last changed    : 1/15/2012 10:53:04 AM by JK
                (modified after loading)
Method Info     : S1C6 20min1.M: 1% MeOH, OB-H 2.5 mL/min, 20 min
  
```

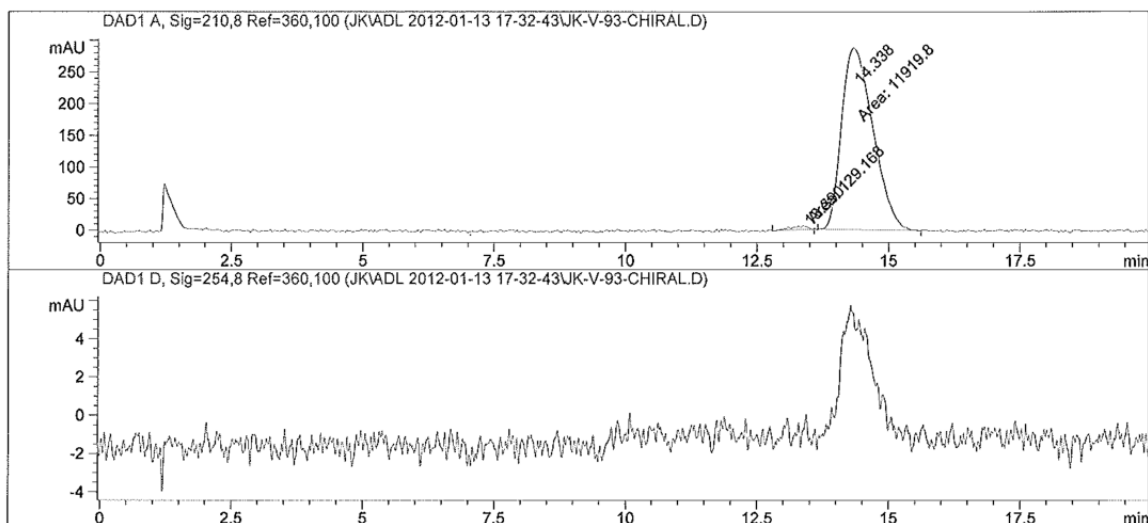

=====  
 Area Percent Report  
 =====

```

Sorted By      :      Signal
Multiplier     :      1.0000
Dilution       :      1.0000
Use Multiplier & Dilution Factor with ISTDs
  
```

Signal 1: DAD1 A, Sig=210,8 Ref=360,100

| Peak # | RetTime [min] | Type | Width [min] | Area [mAU*s] | Height [mAU] | Area %  |
|--------|---------------|------|-------------|--------------|--------------|---------|
| 1      | 13.390        | MM   | 0.3785      | 129.16808    | 5.68712      | 1.0720  |
| 2      | 14.338        | MM   | 0.6926      | 1.19198e4    | 286.81857    | 98.9280 |

Totals :                                    1.20490e4    292.50569

Figure SI-39E. Chiral SFC data of enantioenriched compound 7e.

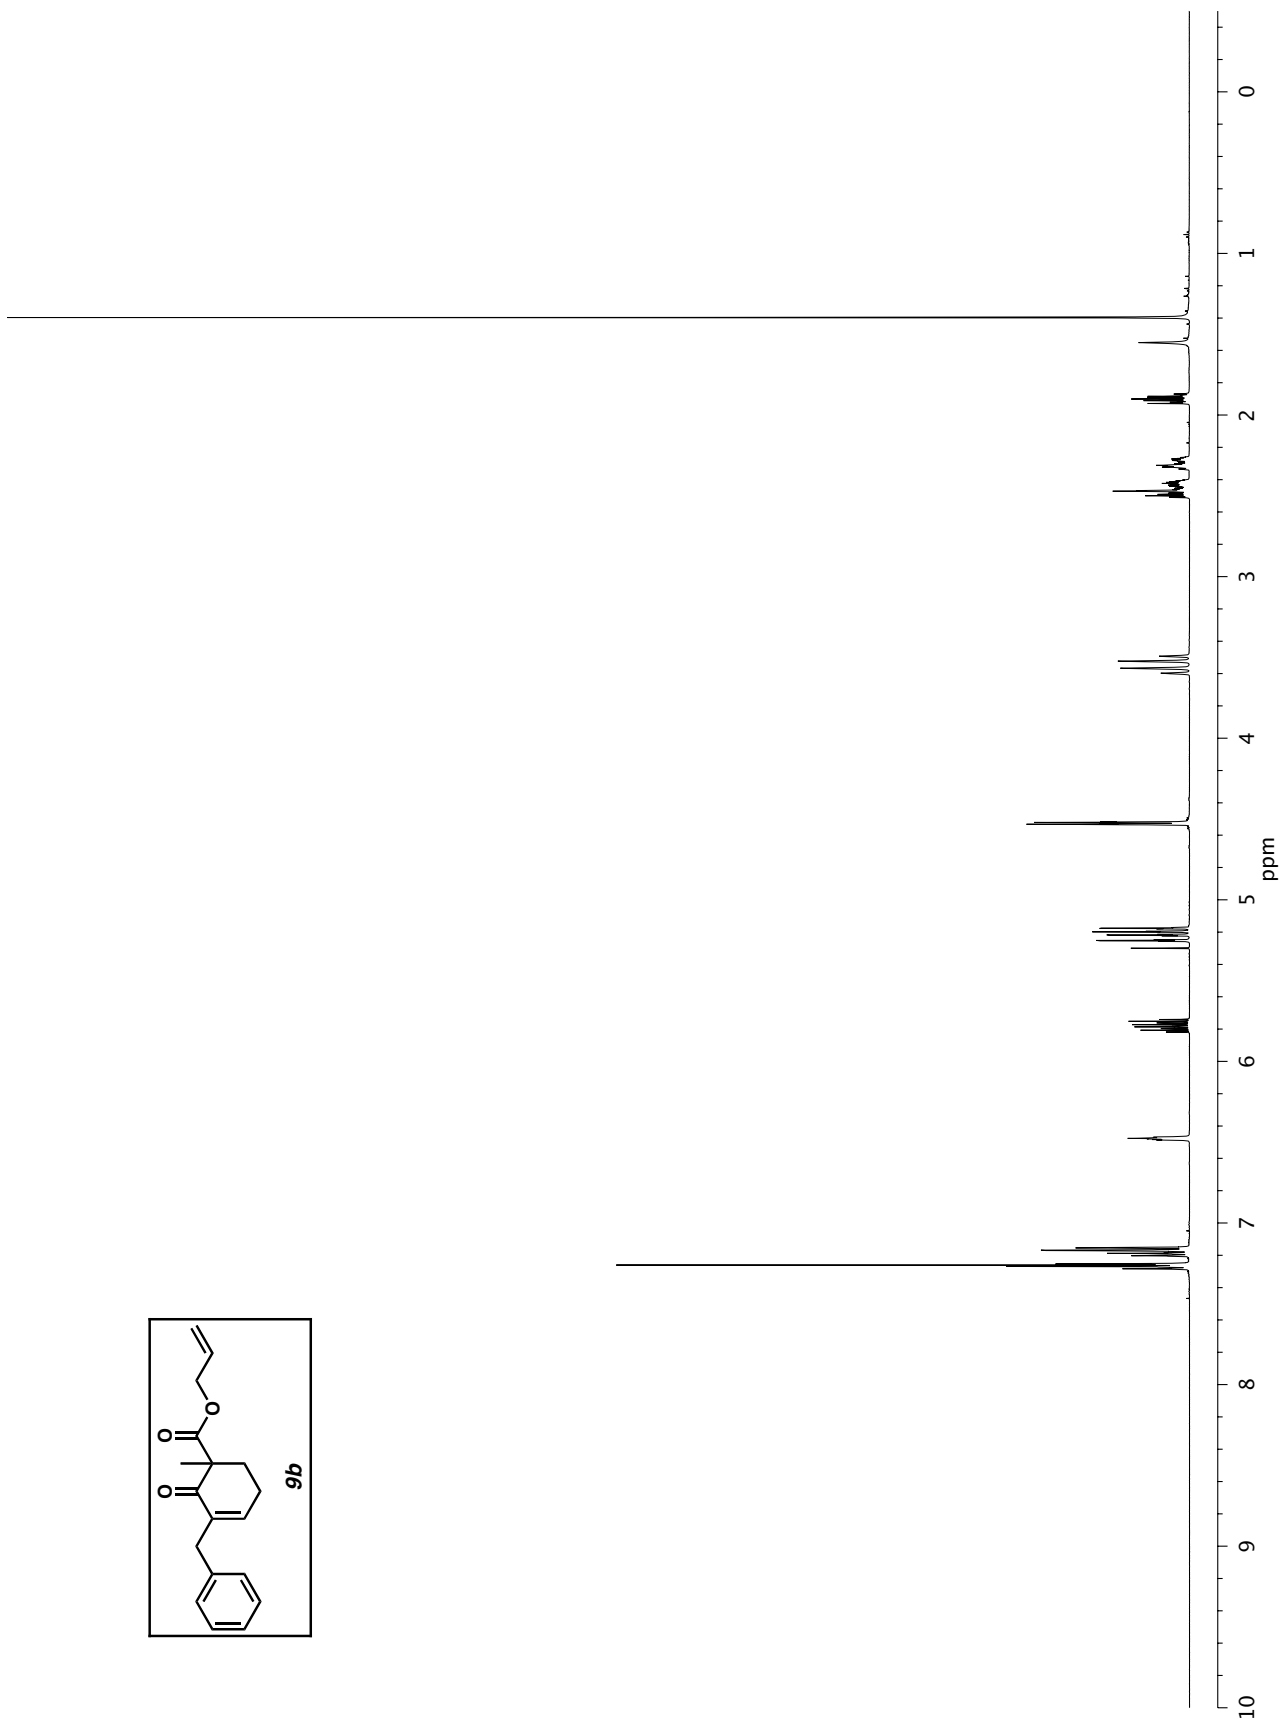

Figure SI-40A.  $^1\text{H}$  NMR (500 MHz,  $\text{CDCl}_3$ ) of compound **9b**.

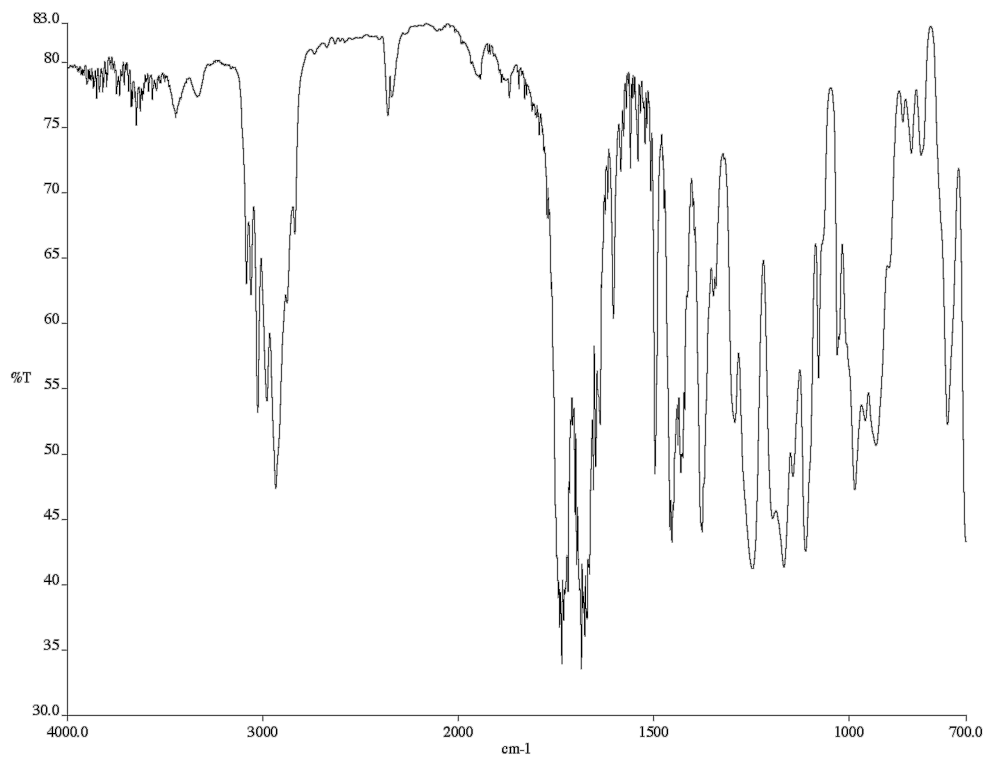

Figure SI-40B. Infrared spectrum (thin film/NaCl) of compound **9b**.

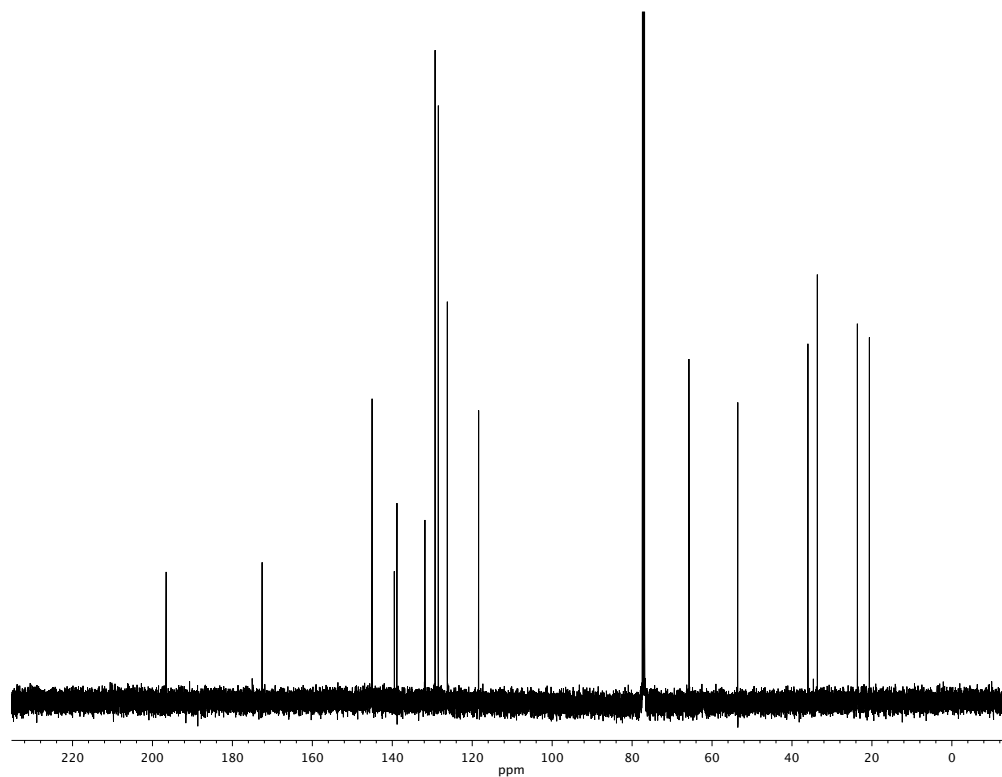

Figure SI-40C. <sup>13</sup>C NMR (125 MHz, CDCl<sub>3</sub>) of compound **9b**.

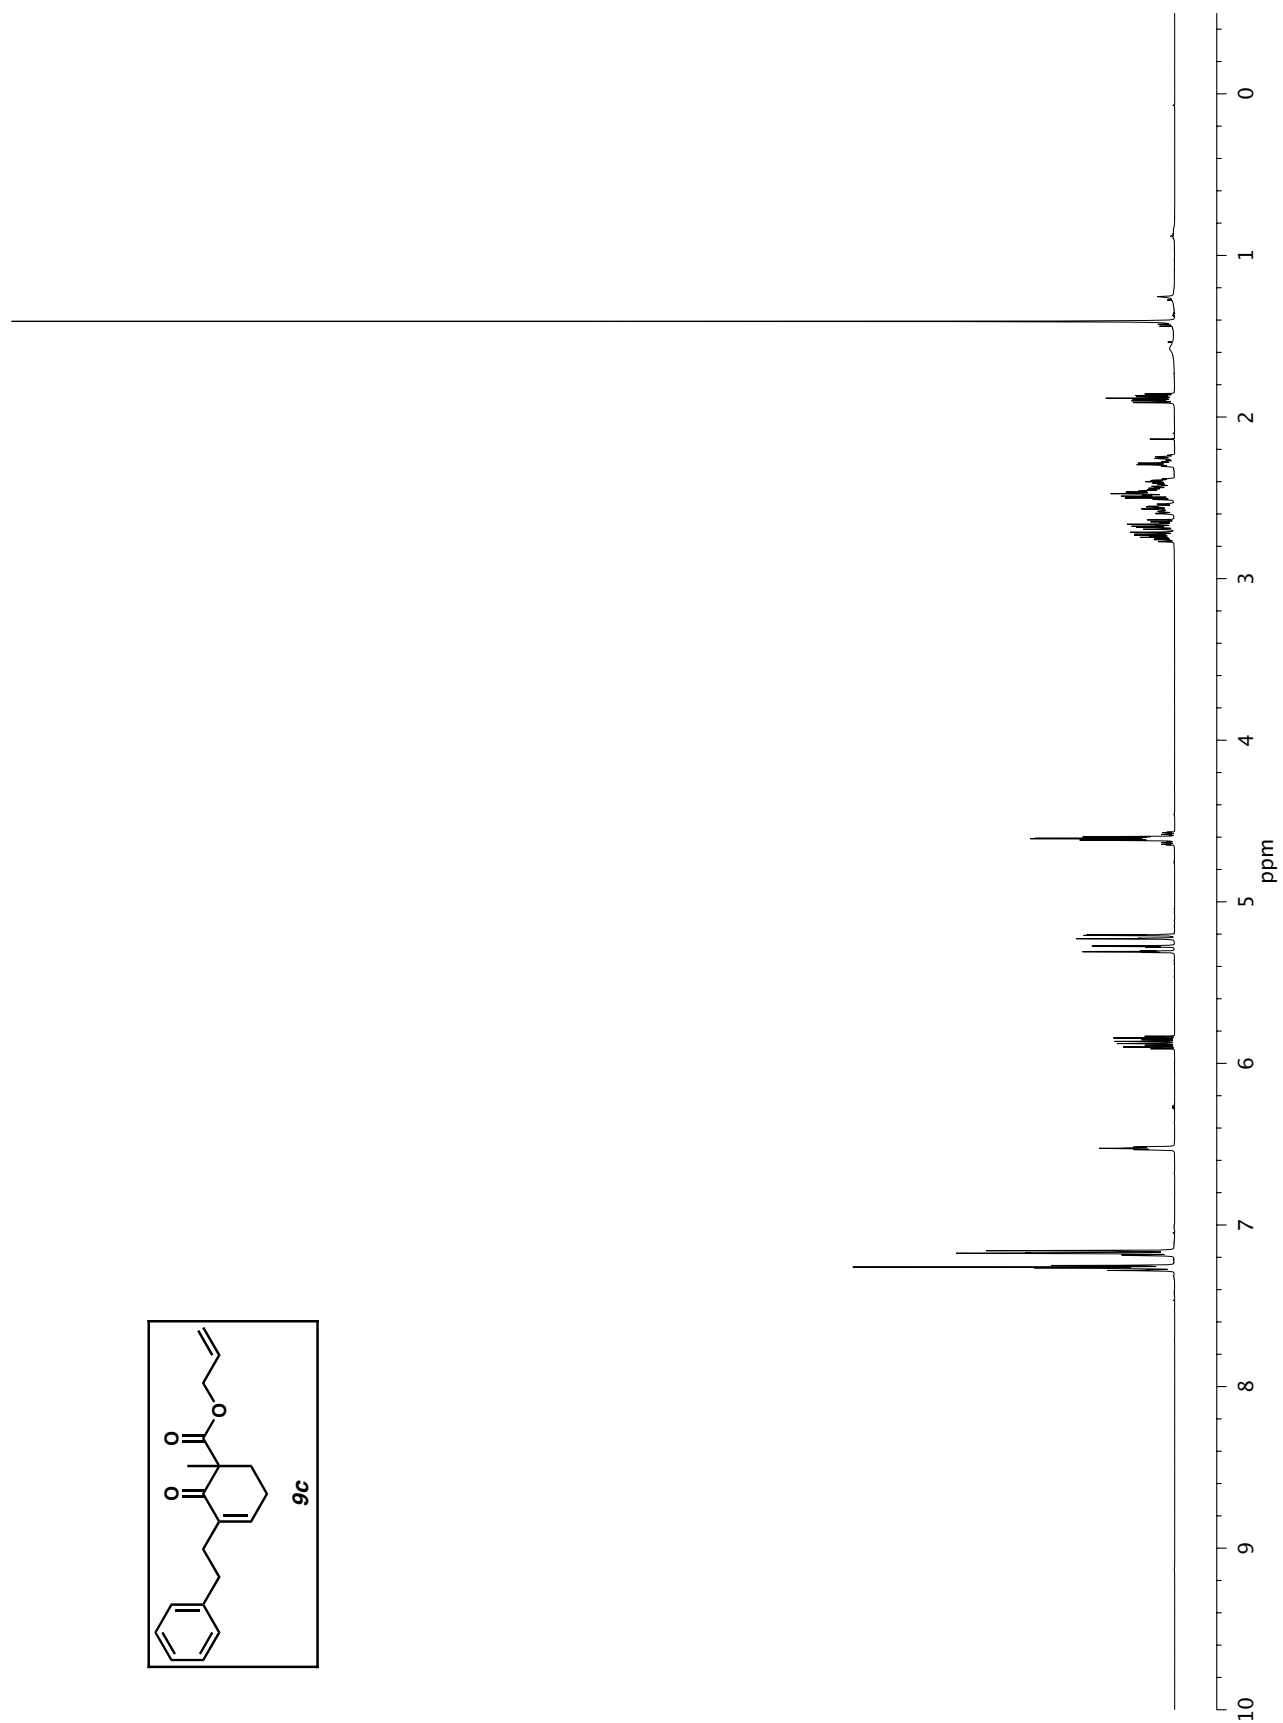

Figure SI-41A.  $^1\text{H NMR}$  (500 MHz,  $\text{CDCl}_3$ ) of compound **9c**.



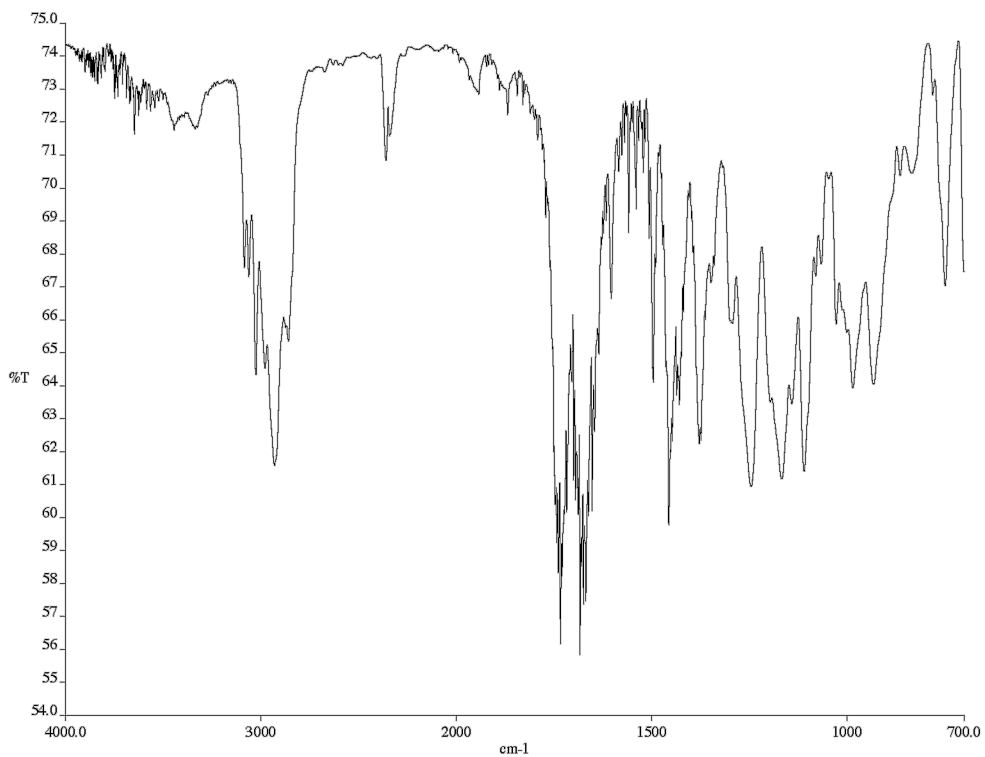

Figure SI-41B. Infrared spectrum (thin film/NaCl) of compound **9c**.

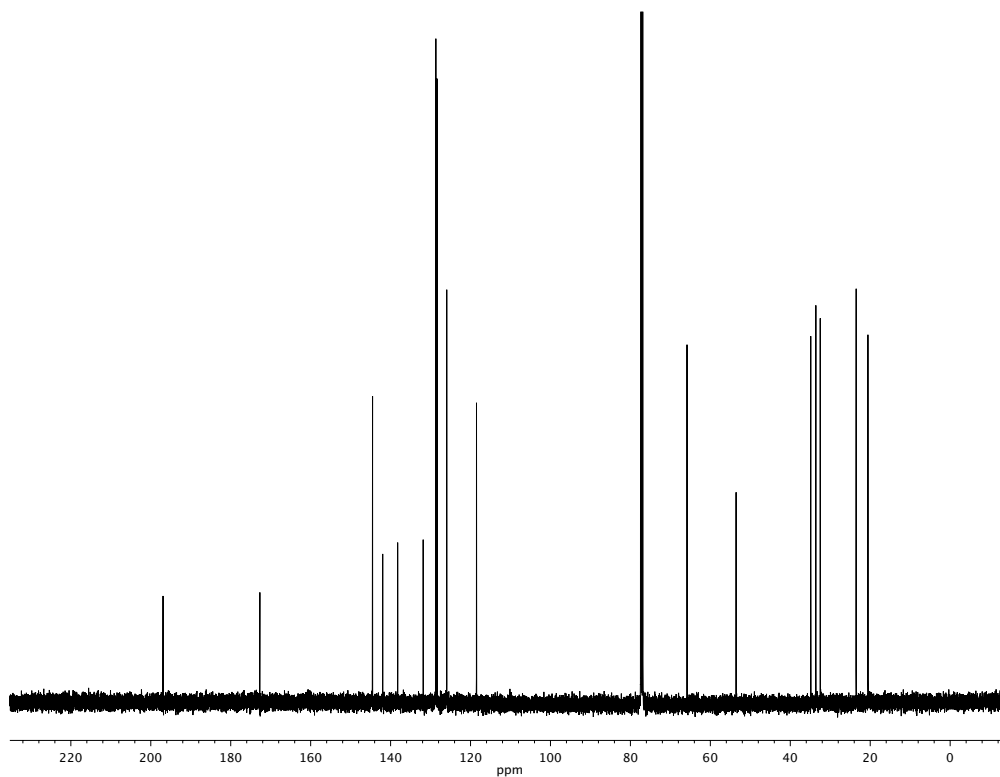

Figure SI-41C. <sup>13</sup>C NMR (125 MHz, CDCl<sub>3</sub>) of compound **9c**.

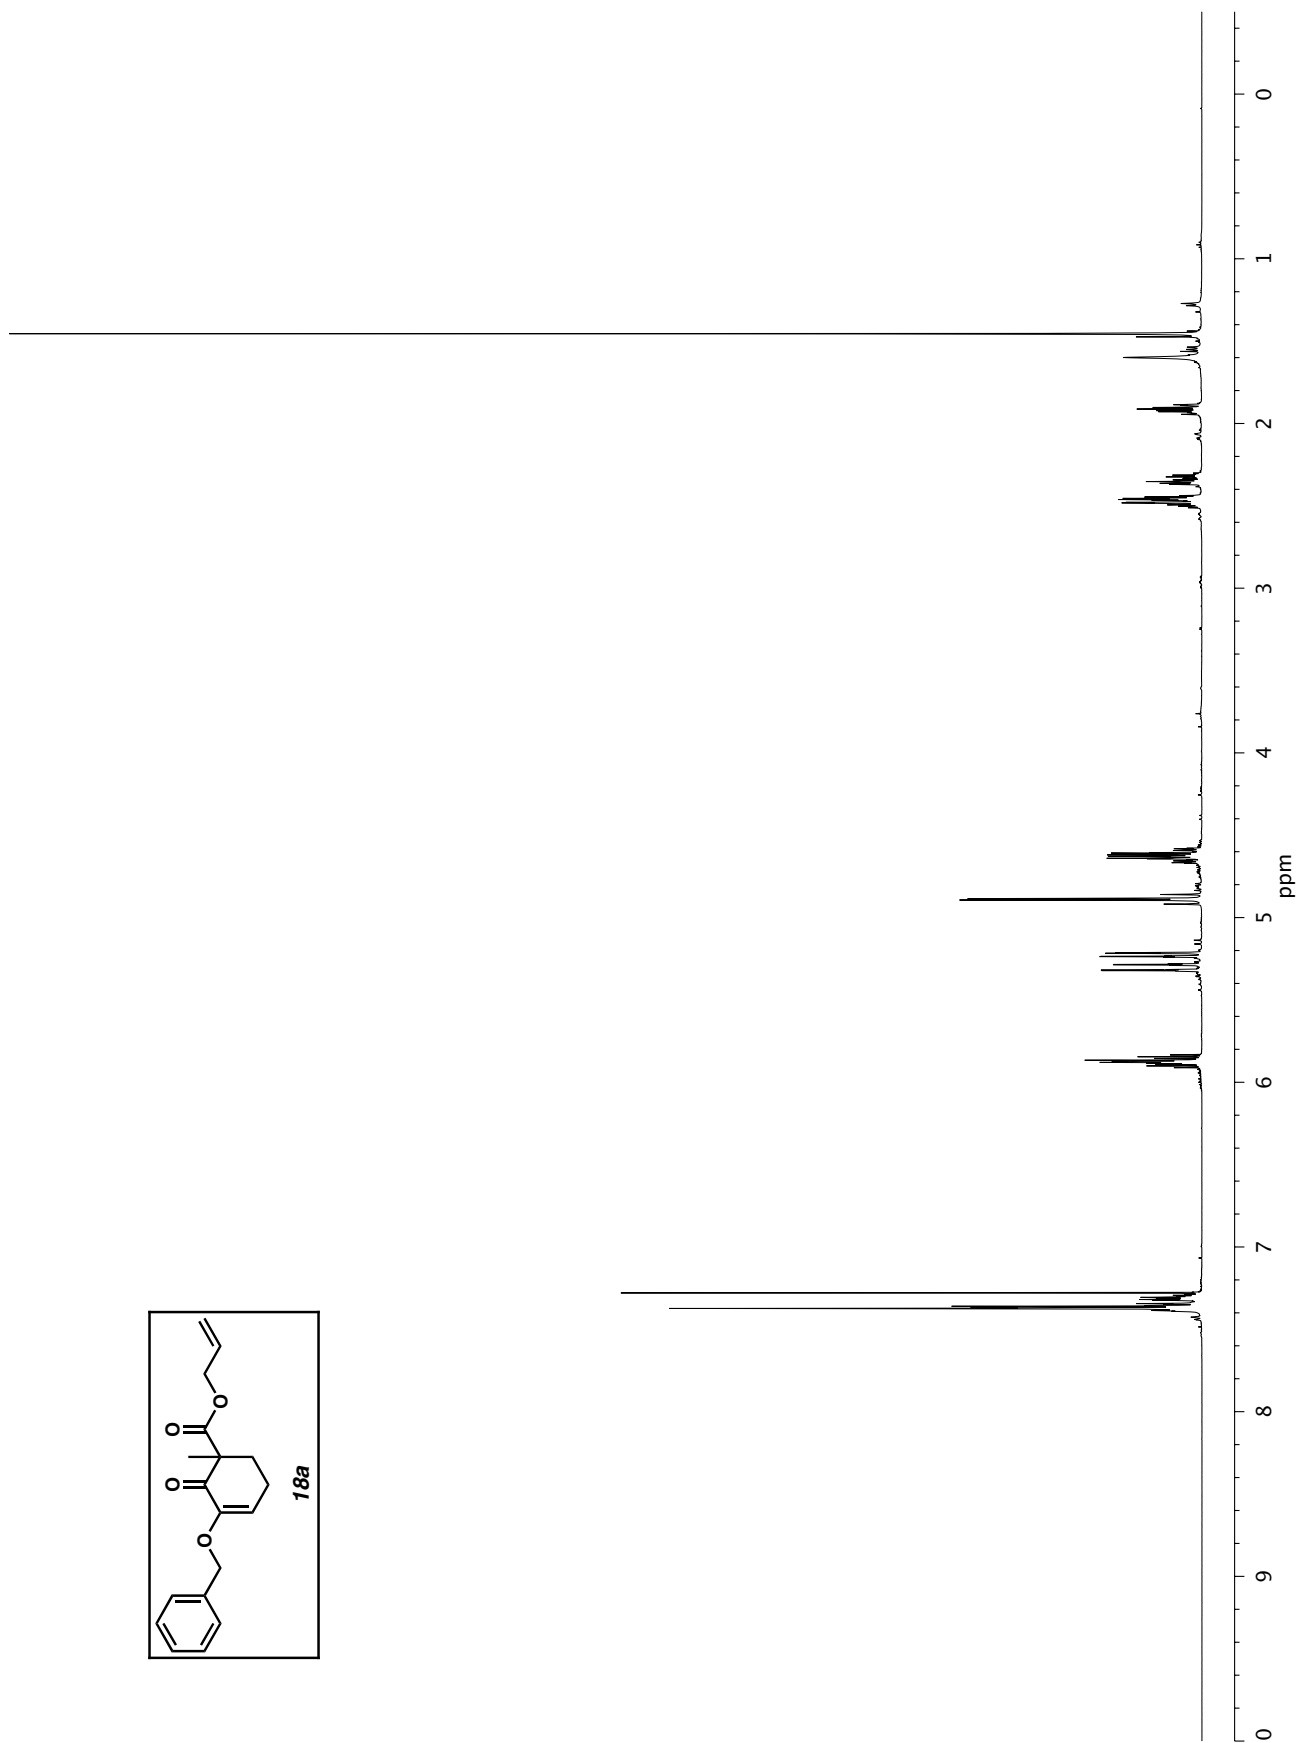

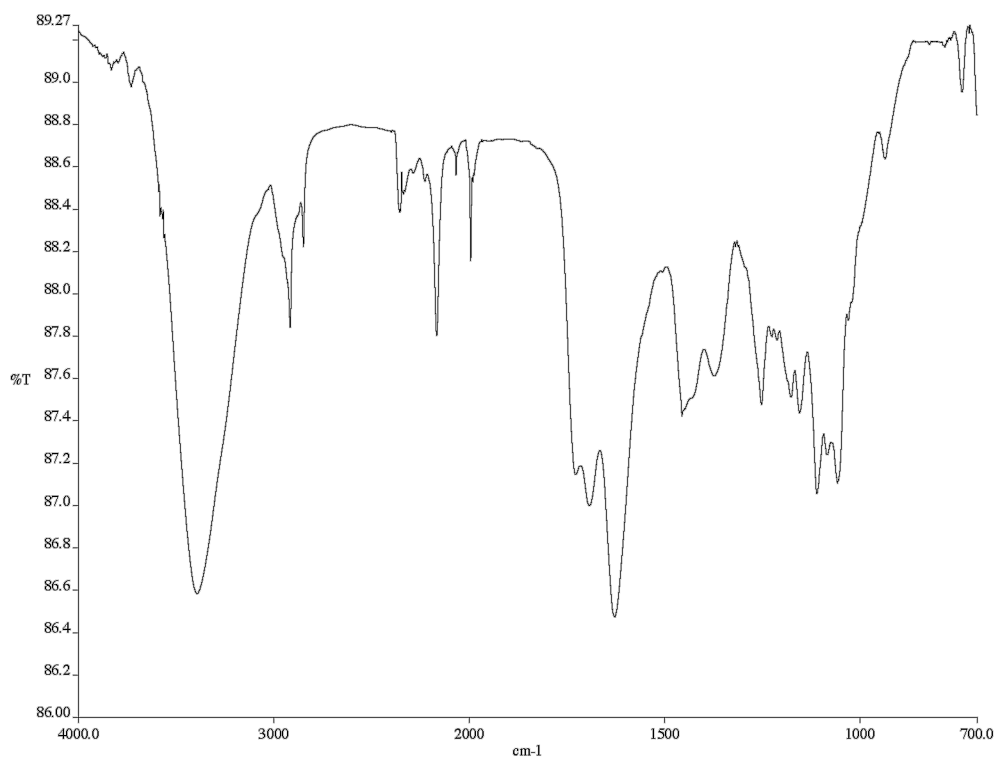

Figure SI-42B. Infrared spectrum (thin film/NaCl) of compound **18a**.

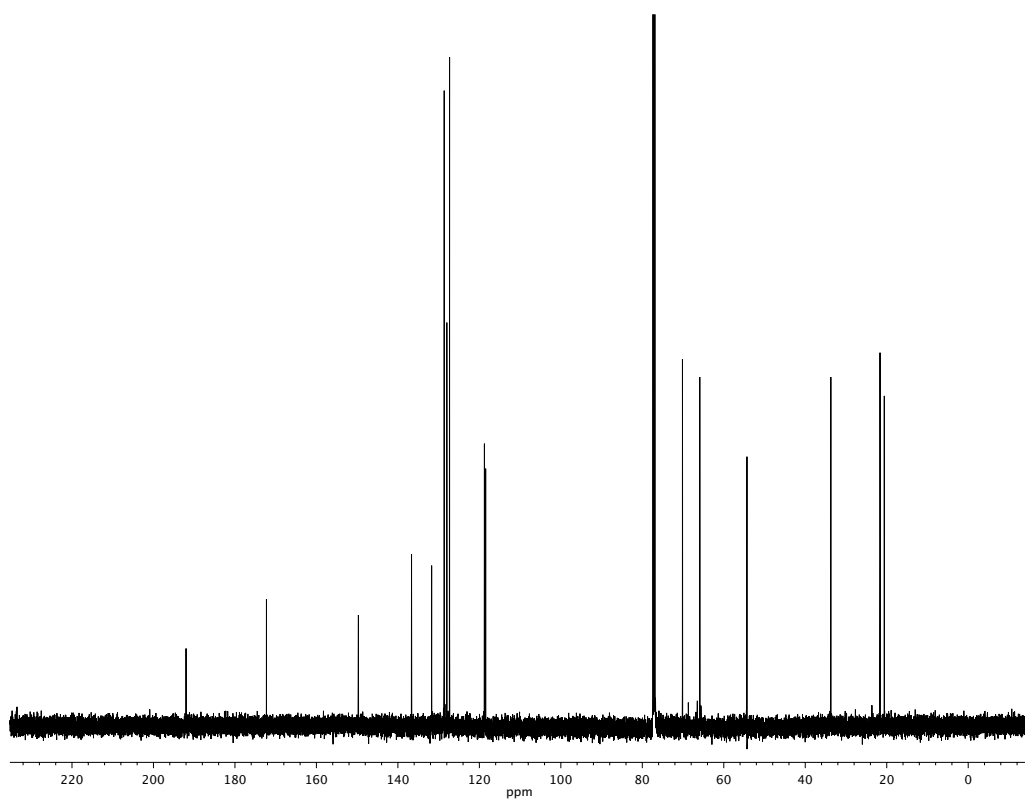

Figure SI-42C. <sup>13</sup>C NMR (125 MHz, CDCl<sub>3</sub>) of compound **18a**.

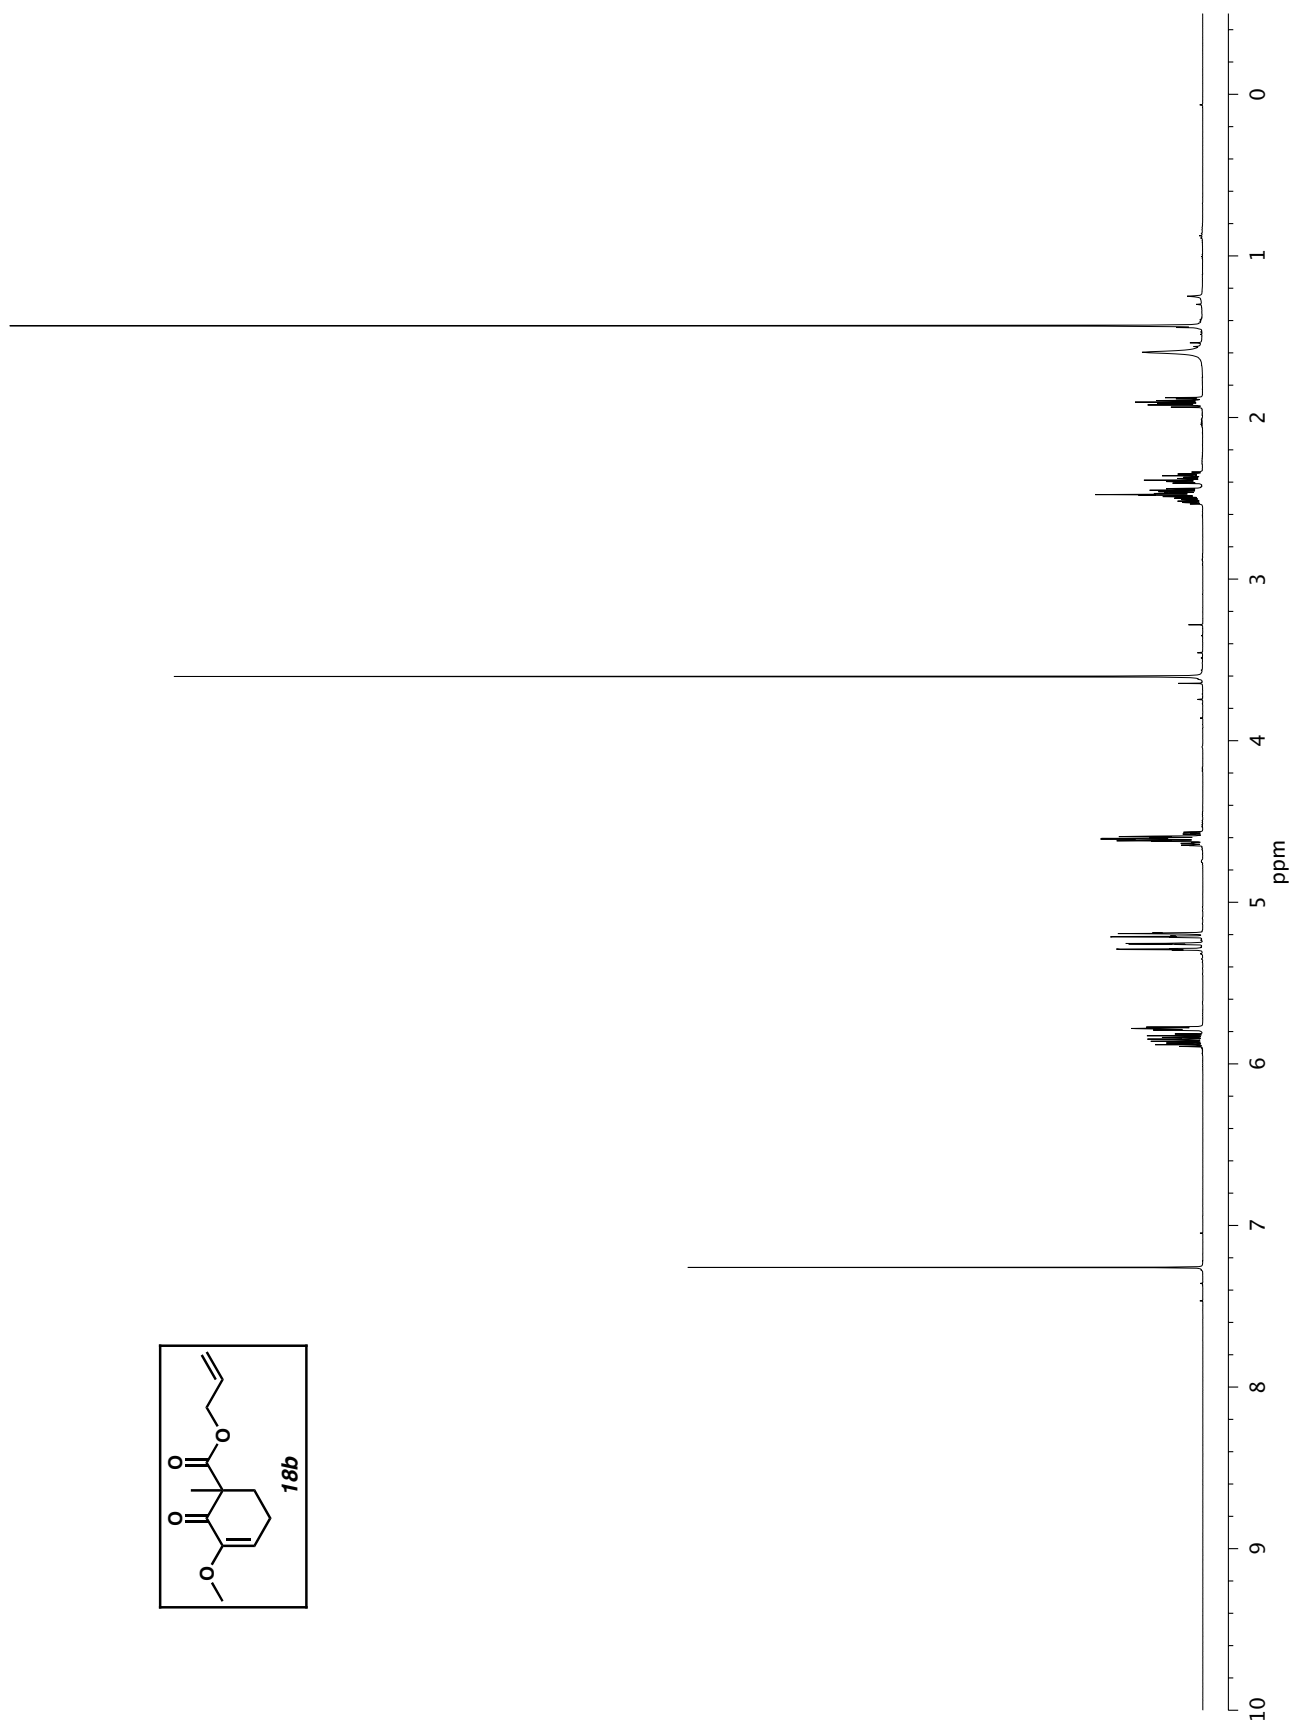

Figure SI-43A.  $^1\text{H}$  NMR (500 MHz,  $\text{CDCl}_3$ ) of compound **18b**.

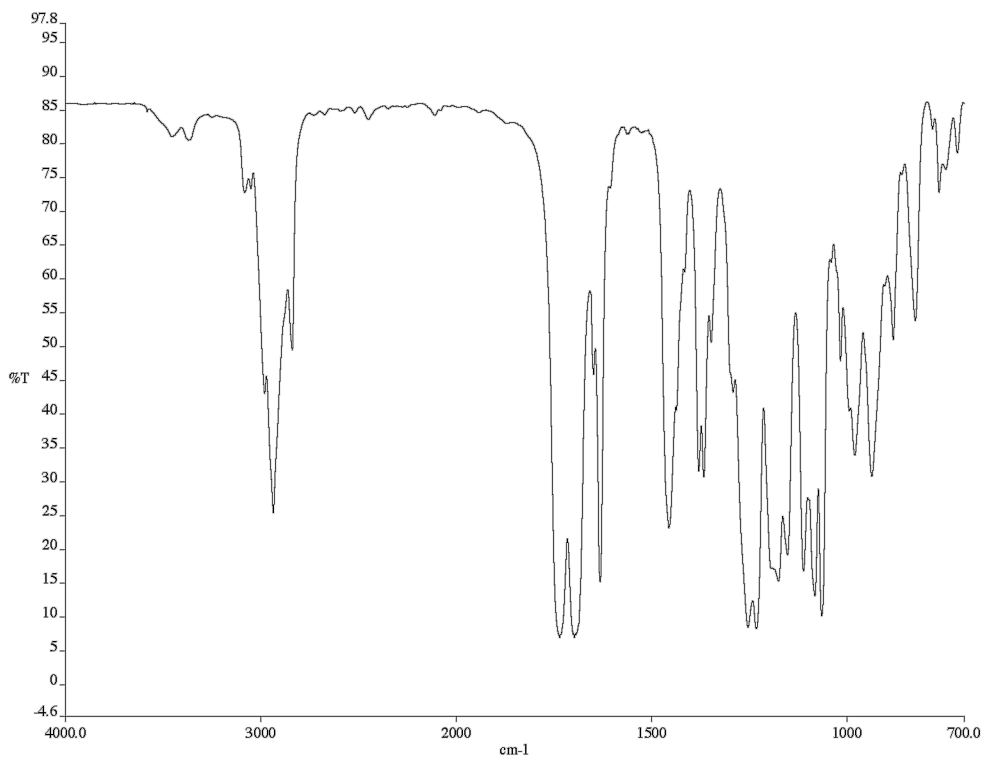

Figure SI-43B. Infrared spectrum (thin film/NaCl) of compound **18b**.

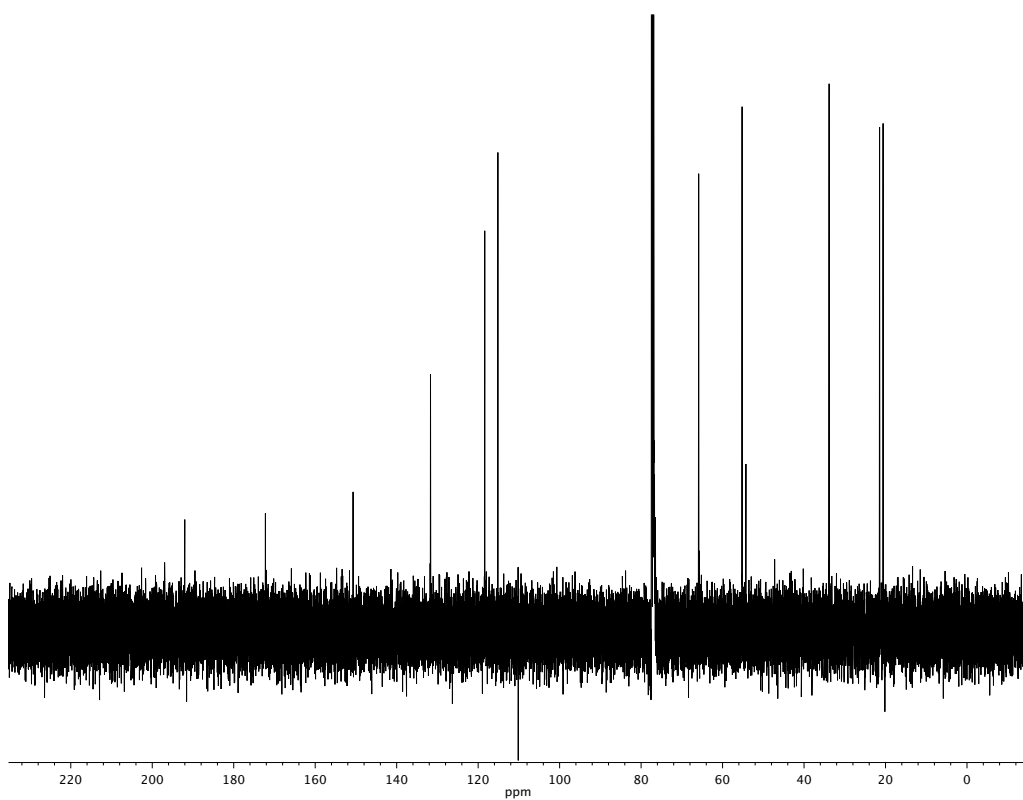

Figure SI-43C. <sup>13</sup>C NMR (125 MHz, CDCl<sub>3</sub>) of compound **18b**.

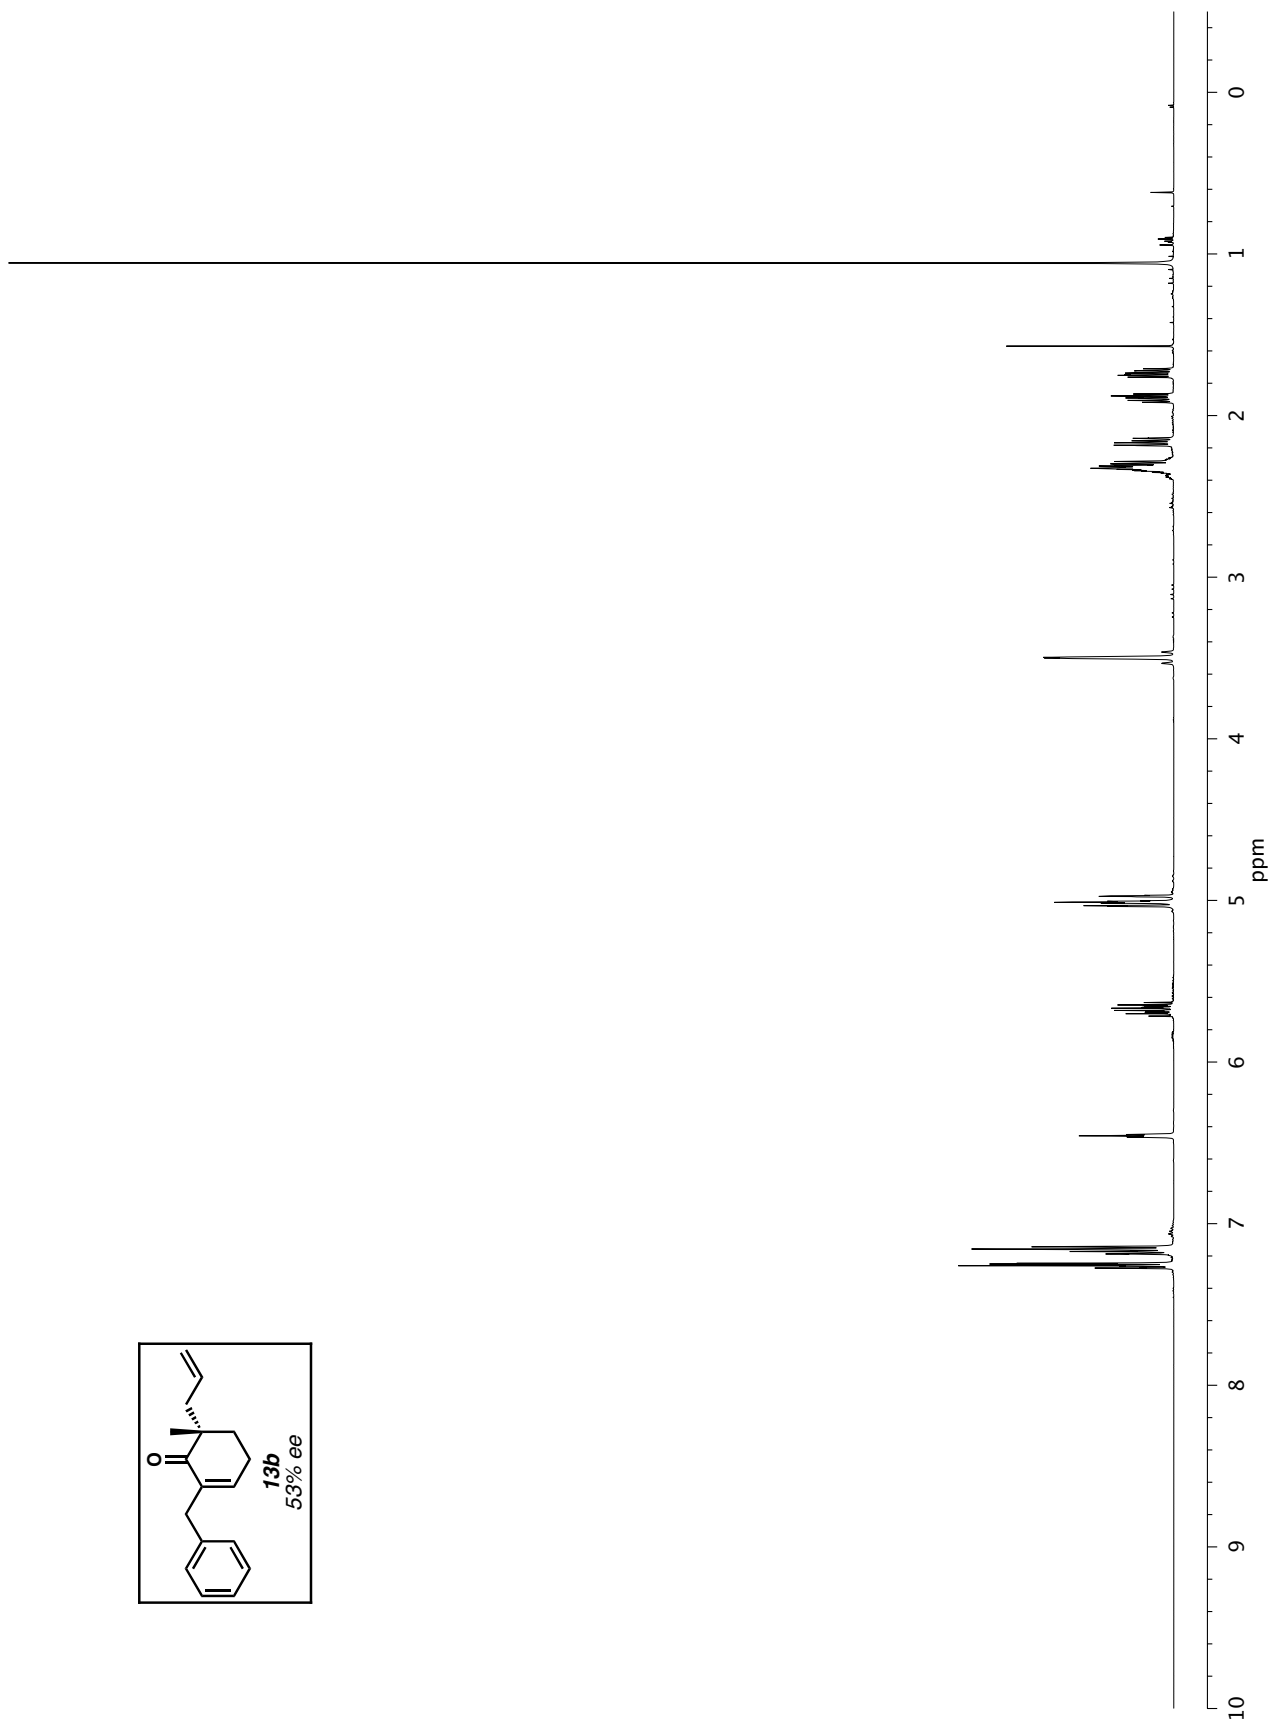Figure SI-444. <sup>1</sup>H NMR (500 MHz, CDCl<sub>3</sub>) of compound **13b**.

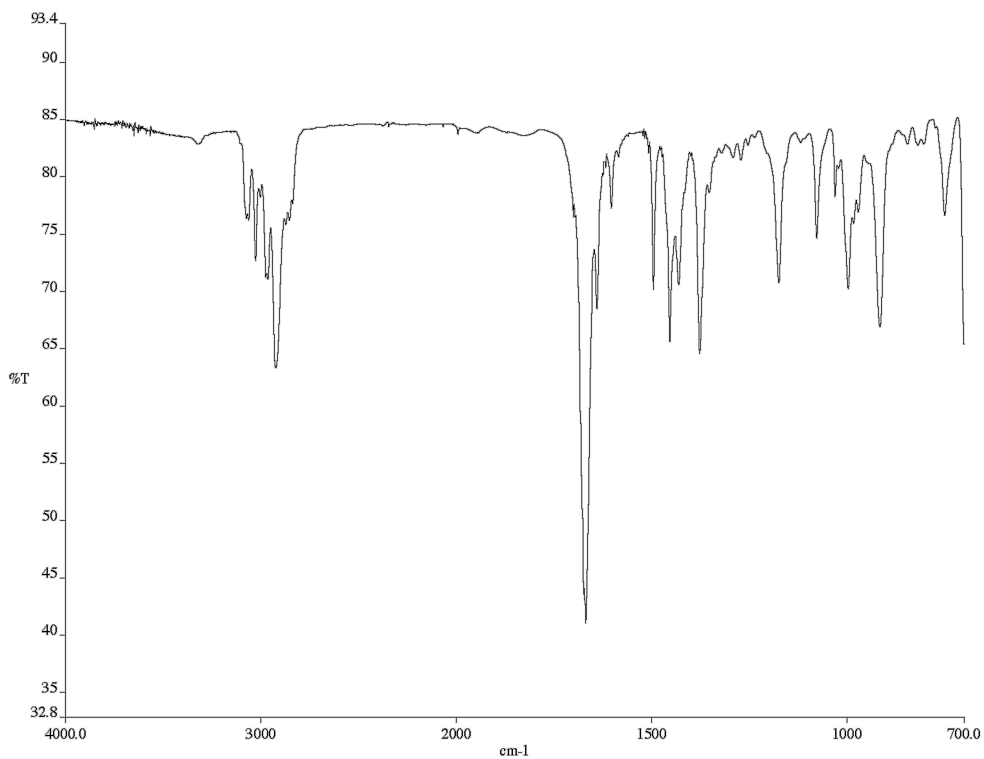

Figure SI-44B. Infrared spectrum (thin film/NaCl) of compound **13b**.

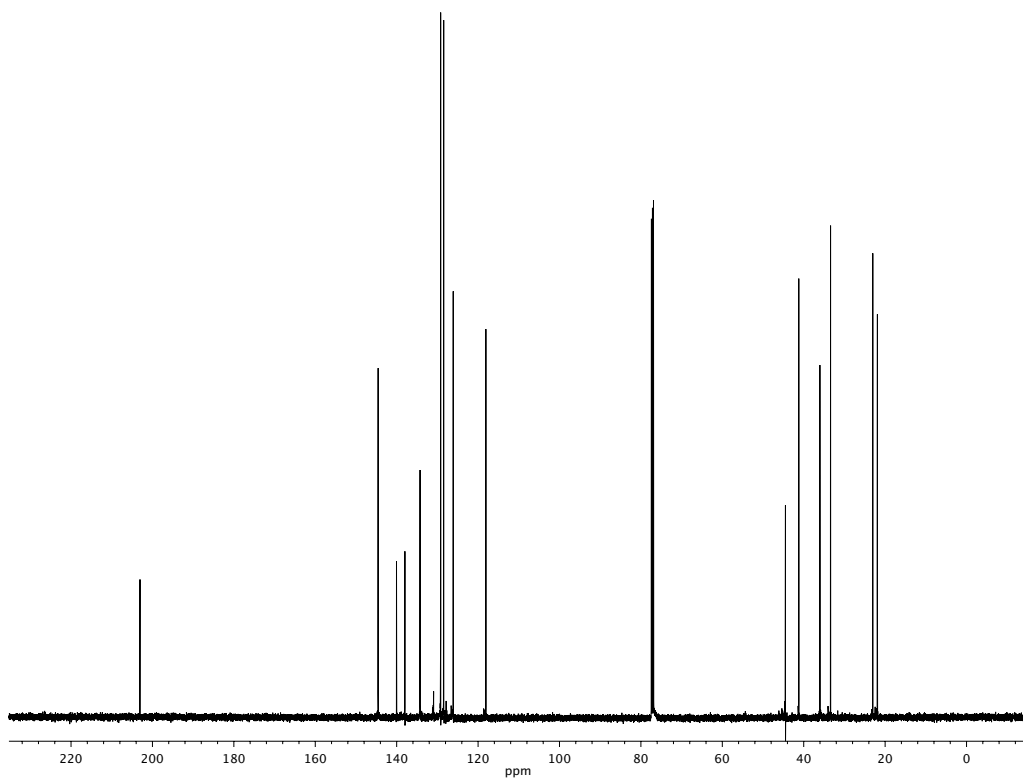

Figure SI-44C. <sup>13</sup>C NMR (125 MHz, CDCl<sub>3</sub>) of compound **13b**.

DCD-V-057rerun DCD-V-057rerun 11/8/2012 4:34:57 PM

## Analytical Report SFC

## Chromatogram Information

User Name User  
 HPLC System Name Jasco SFC w PDA  
 Injection Date 10/29/2012 7:48:40 PM  
 Volume 5.00 [μL]  
 Sample # 11  
 Project Name Cal Tech SFC  
 Executed Sequence DCD-V-057rerun  
 Chromatogram Name DCD-V-057rerun  
 Sample Name  
 Acquisition Time 17.0 [min]  
 Acquisition Sequence DCD-V-057rerun  
 Control Method Solv 1 Col 3 Isocratic 3B 5mL\_min 10MPa 20min

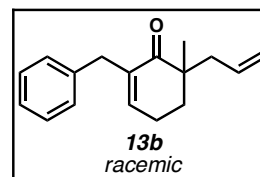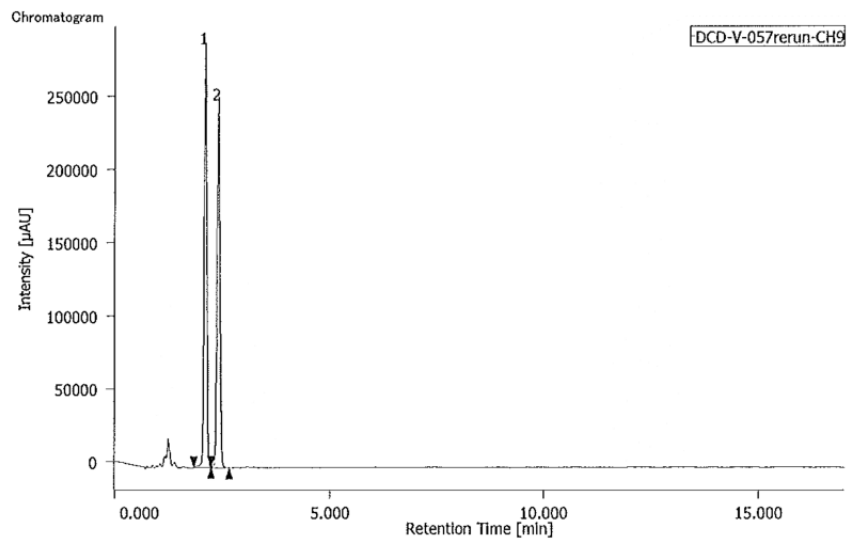

## Peak Information

| # | Peak Name | CH | IR [min] | Area [μV·sec] | Height [μV] | Area%  | Peak Start | Peak End | Peak Width | Resolution | Symmetry Factor |
|---|-----------|----|----------|---------------|-------------|--------|------------|----------|------------|------------|-----------------|
| 1 | Unknown   | 9  | 2.107    | 1166667       | 287168      | 49.986 | 1.853      | 2.253    | 0.062      | 2.716      | 1.191           |
| 2 | Unknown   | 9  | 2.413    | 1167308       | 249093      | 50.014 | 2.253      | 2.667    | 0.071      | N/A        | 1.102           |

1/1

Figure SI-44D. Chiral SFC data of racemic compound **13b**.



DCD-V-061\_063 DCD-V-061fr10 11/8/2012 4:35:32 PM

## Analytical Report SFC

## Chromatogram Information

User  
 HPLC System Name: Jasco SFC w PDA  
 Injection Date: 10/28/2012 10:34:49 PM  
 Volume: 3.00 [μL]  
 Sample #: 53  
 Project Name: Cal Tech SFC  
 Executed Sequence: DCD-V-061\_063  
 Chromatogram Name: DCD-V-061fr10  
 Sample Name:  
 Acquisition Time: 17.0 [min]  
 Acquisition Sequence: DCD-V-061\_063  
 Control Method: Solv 1 Col 3 Isocratic 3B 5mL\_min 10MPa 20min

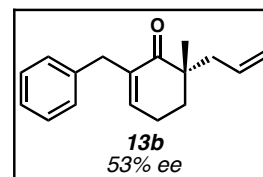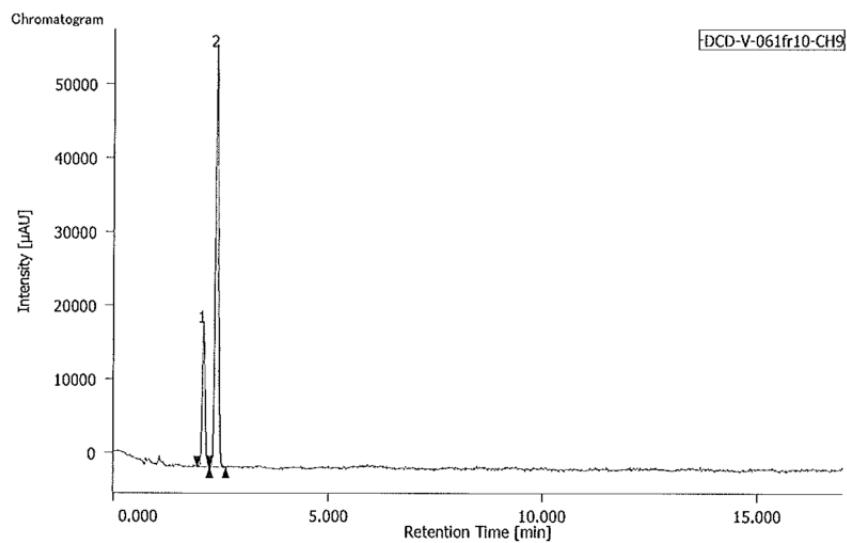

## Peak Information

| # | Peak Name | CH | tR [min] | Area [μV·sec] | Height [μV] | Area%  | Peak Start | Peak End | Peak Width | Resolution | Symmetry Factor |
|---|-----------|----|----------|---------------|-------------|--------|------------|----------|------------|------------|-----------------|
| 1 | Unknown   | 9  | 2.107    | 86755         | 19212       | 23.374 | 1.960      | 2.253    | 0.069      | 2.367      | 1.089           |
| 2 | Unknown   | 9  | 2.400    | 284406        | 56497       | 76.626 | 2.253      | 2.627    | 0.077      | N/A        | 1.131           |

1/1

Figure SI-44E. Chiral SFC data of enantioenriched compound **13b**.

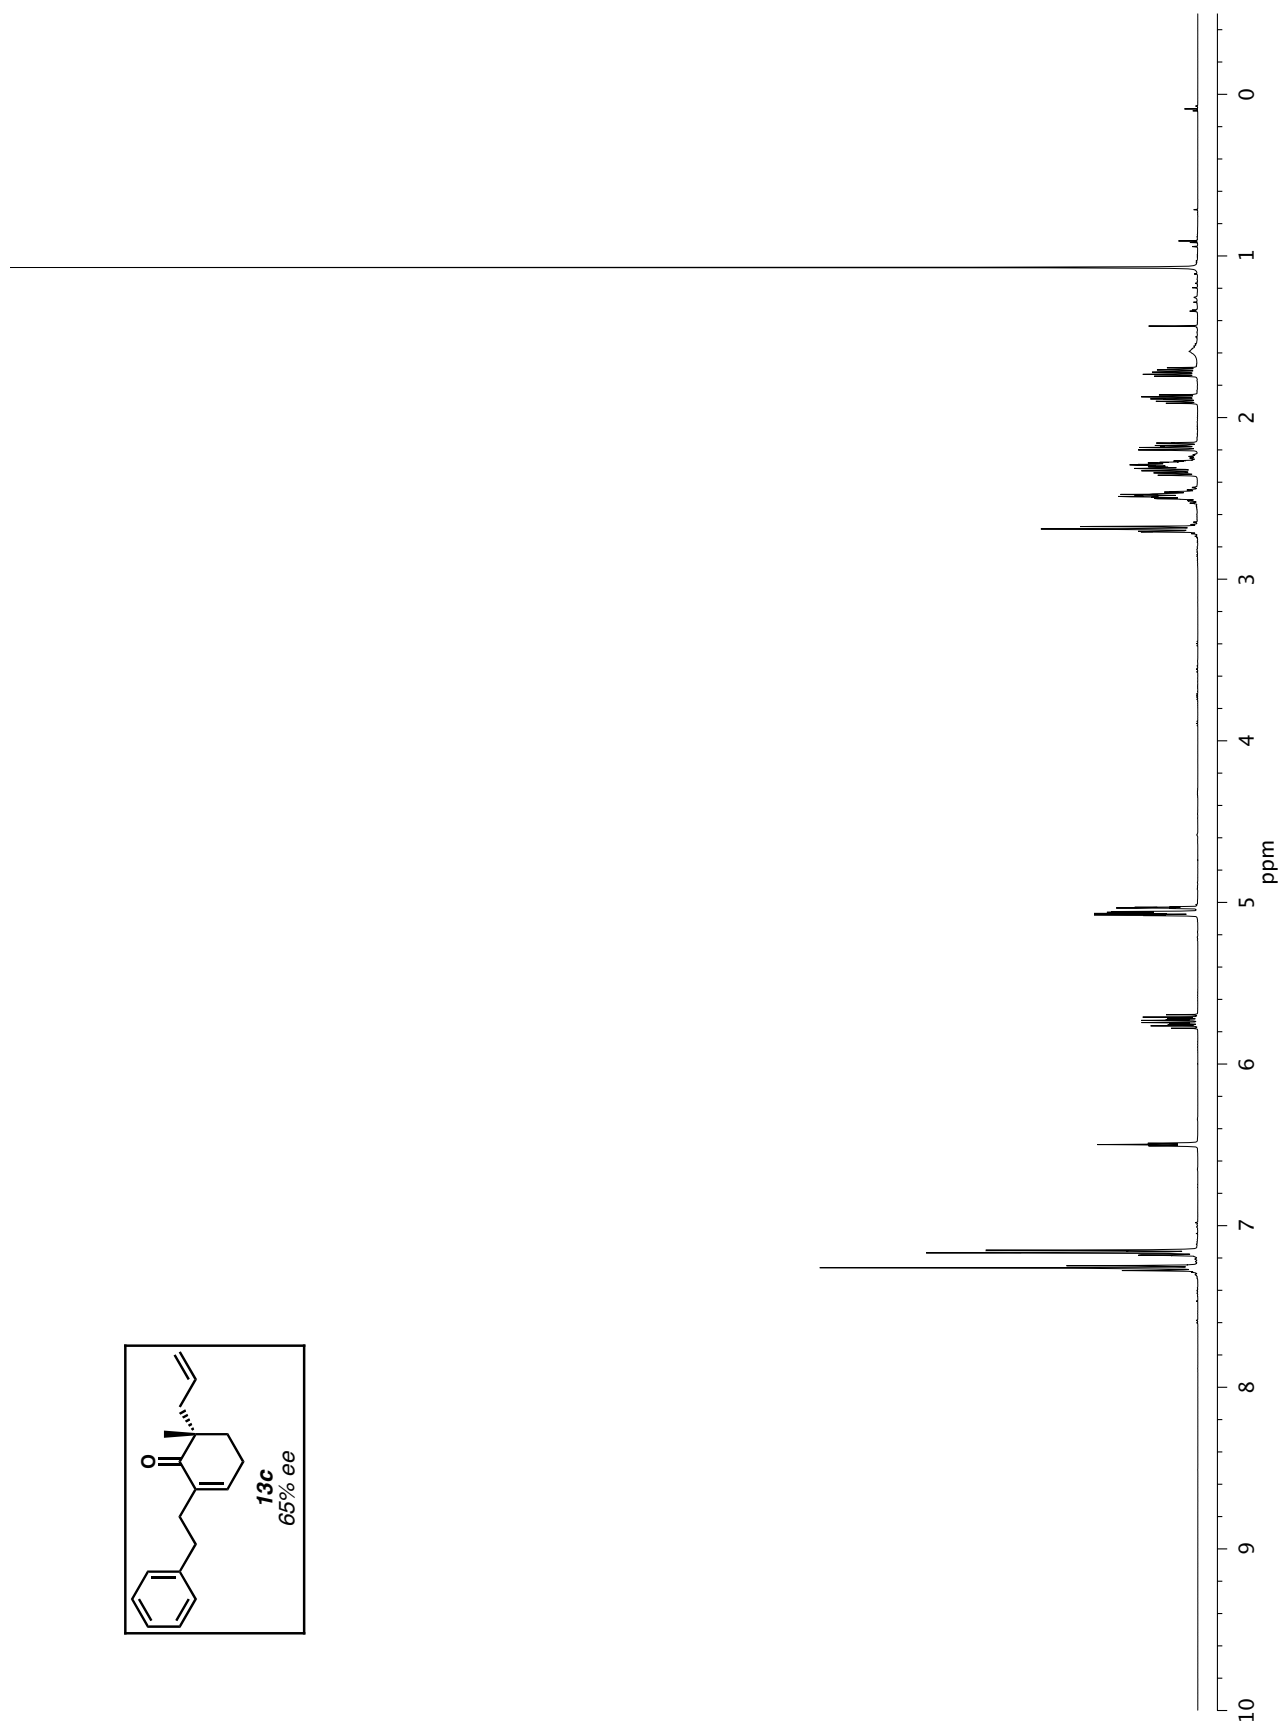Figure SI-45A.  $^1\text{H}$  NMR (500 MHz,  $\text{CDCl}_3$ ) of compound **13c**.

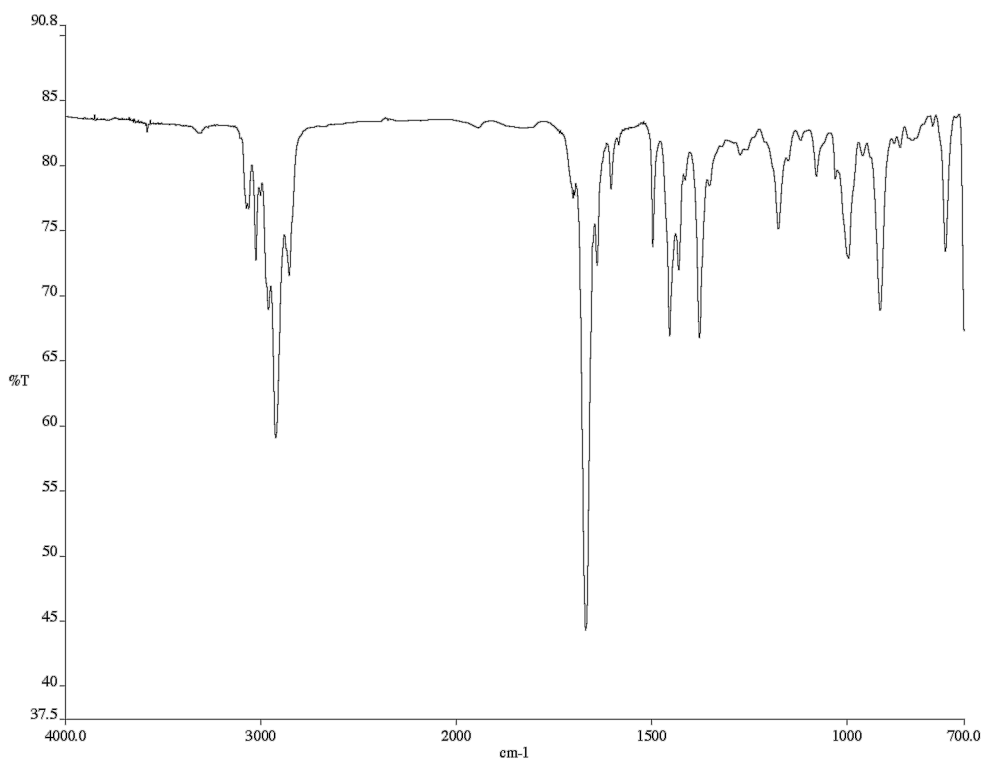

Figure SI-45B. Infrared spectrum (thin film/NaCl) of compound **13c**.

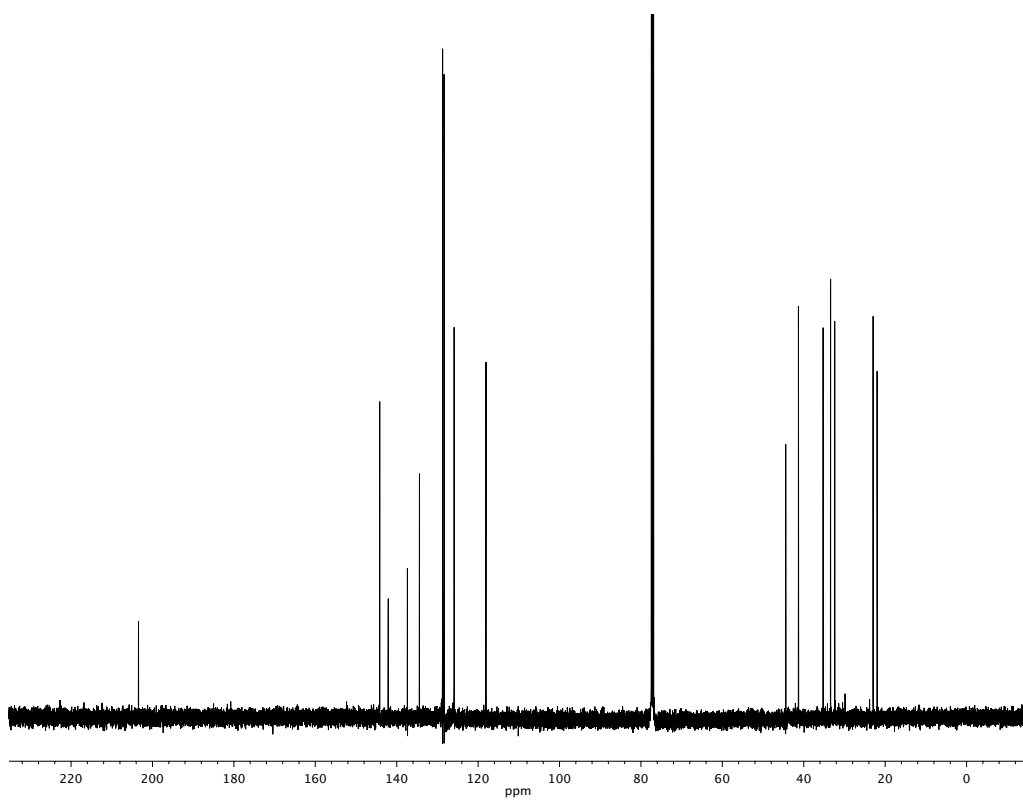

Figure SI-45C. <sup>13</sup>C NMR (125 MHz, CDCl<sub>3</sub>) of compound **13c**.

DCD-V-059rerun DCD-V-059rerun 11/8/2012 4:32:48 PM

## Analytical Report SFC

## Chromatogram Information

User  
 HPLC System Name  
 Injection Date  
 Volume  
 Sample #  
 Project Name  
 Executed Sequence  
 Chromatogram Name  
 Sample Name  
 Acquisition Time  
 Acquisition Sequence  
 Control Method

User  
 Jasco SFC w PDA  
 10/29/2012 10:09:51 PM  
 5.00 [μL]  
 12  
 Cal Tech SFC  
 DCD-V-059rerun  
 DCD-V-059rerun  
 17.0 [min]  
 DCD-V-059rerun  
 Solv 1 Col 3 Isocratic 3B 5ml\_min 10MPa 20min

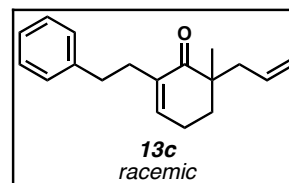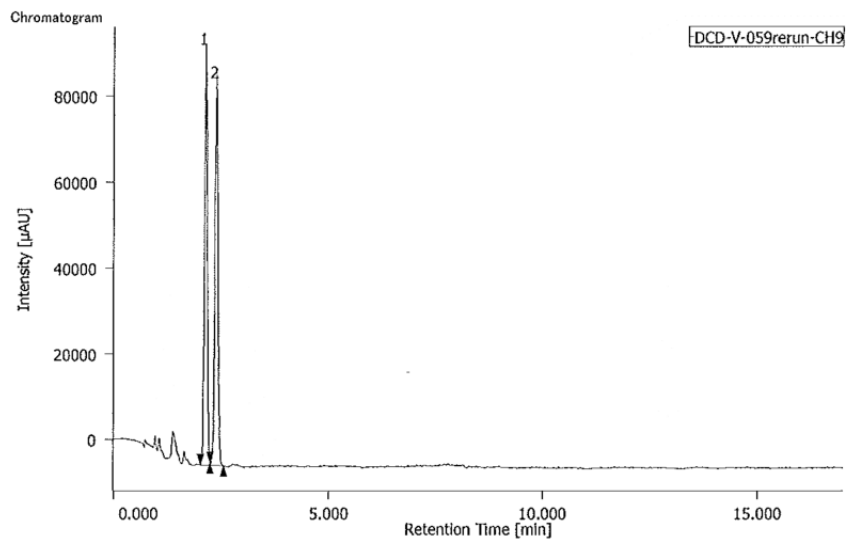

## Peak Information

| # | Peak Name | CH | TR [min] | Area [μV·sec] | Height [μV] | Area%  | Peak Start | Peak End | Peak Width | Resolution | Symmetry Factor |
|---|-----------|----|----------|---------------|-------------|--------|------------|----------|------------|------------|-----------------|
| 1 | Unknown   | 9  | 2.133    | 432536        | 97121       | 50.091 | 2.027      | 2.253    | 0.088      | 2.102      | 1.223           |
| 2 | Unknown   | 9  | 2.387    | 430969        | 89423       | 49.909 | 2.253      | 2.560    | 0.074      | N/A        | 1.082           |

1 / 1

Figure SI-45D. Chiral SFC data of racemic compound **13c**.

DCD-V-063 DCD-V-063fr2 11/8/2012 4:33:34 PM

## Analytical Report SFC

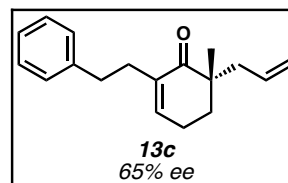

## Chromatogram Information

User: Jasco SFC w PDA  
 HPLC System Name: 10/28/2012 5:02:04 PM  
 Injection Date: 5.00 [μL]  
 Volume: 48  
 Sample #: Cal Tech SFC  
 Project Name: DCD-V-063  
 Executed Sequence: DCD-V-063fr2  
 Chromatogram Name: Sample Name  
 Acquisition Time: 17.0 [min]  
 Acquisition Sequence: DCD-V-063  
 Control Method: Solv 1 Col 3 Isocratic 3B 5mL\_min 10MPa 20min

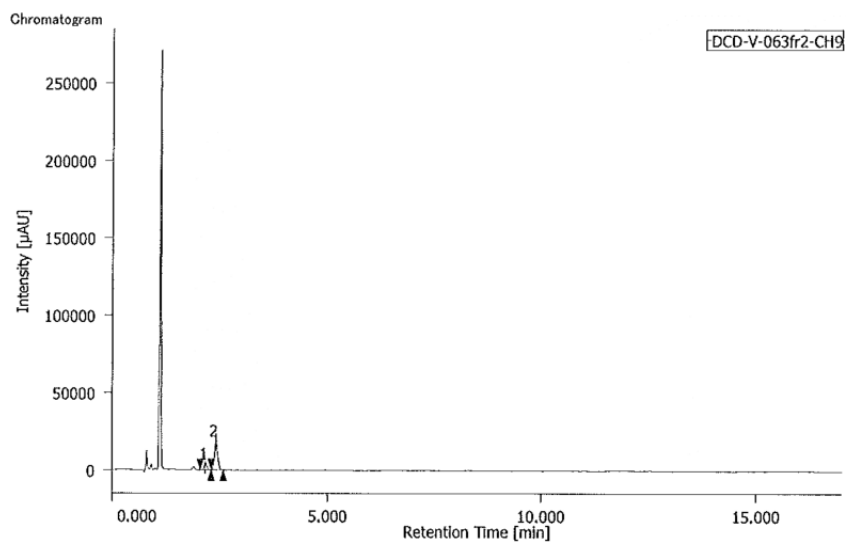

## Peak Information

| # | Peak Name | CH | tR [min] | Area [μV·sec] | Height [μV] | Area%  | Peak Start | Peak End | Peak Width | Resolution | Symmetry Factor |
|---|-----------|----|----------|---------------|-------------|--------|------------|----------|------------|------------|-----------------|
| 1 | Unknown   | 9  | 2.173    | 19981         | 4792        | 17.391 | 2.053      | 2.307    | 0.067      | 2.003      | 1.284           |
| 2 | Unknown   | 9  | 2.413    | 94820         | 19501       | 82.609 | 2.307      | 2.587    | 0.074      | N/A        | 1.359           |

1 / 1

Figure SI-45E. Chiral SFC data of enantioenriched compound **13c**.

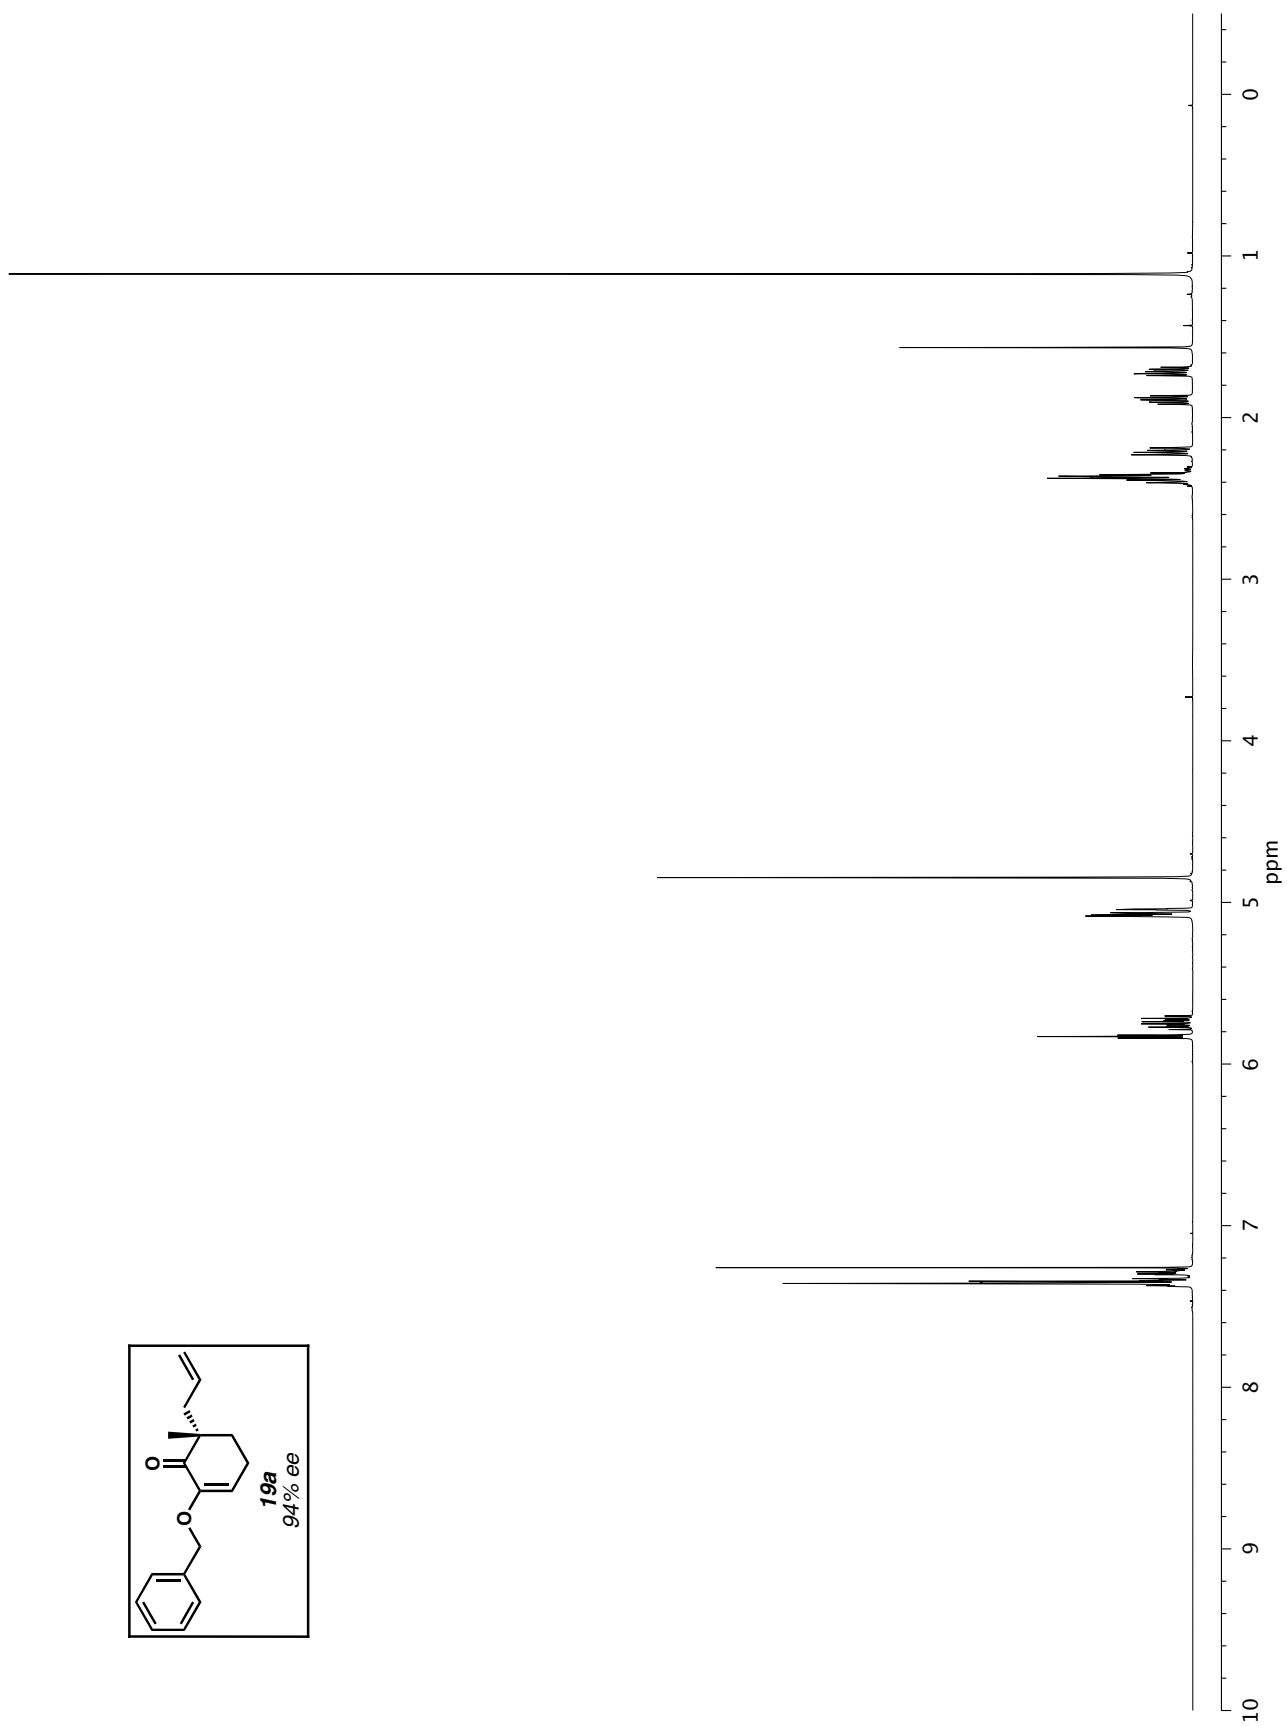Figure SI-46A. <sup>1</sup>H NMR (500 MHz, CDCl<sub>3</sub>) of compound **19a**.

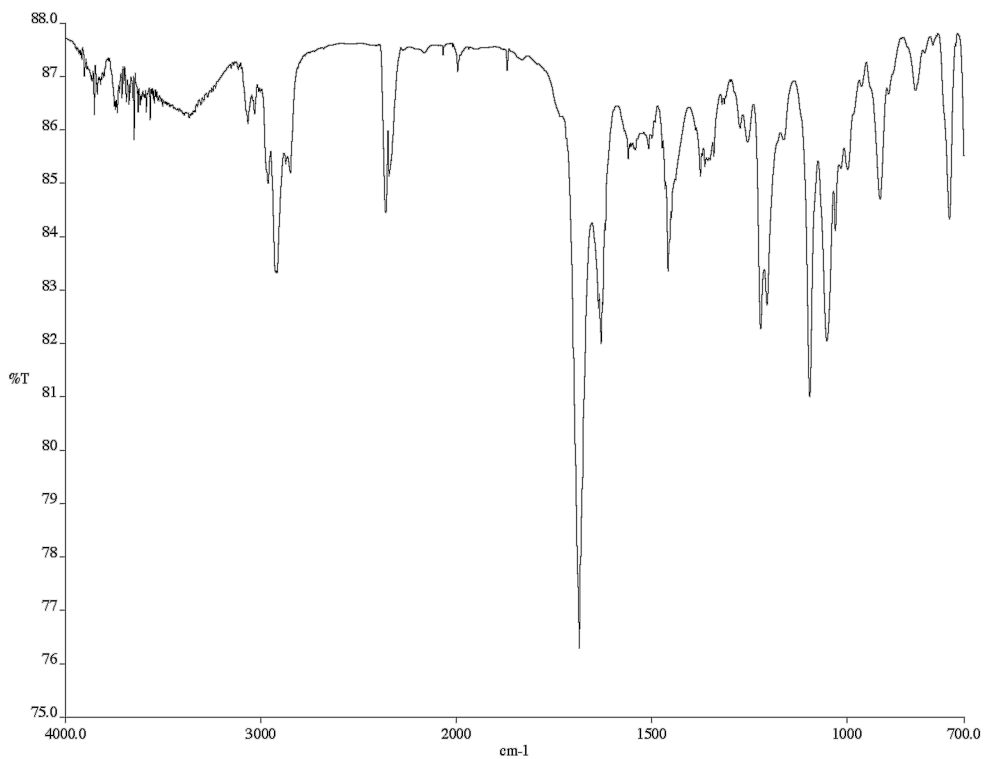

Figure SI-46B. Infrared spectrum (thin film/NaCl) of compound **19a**.

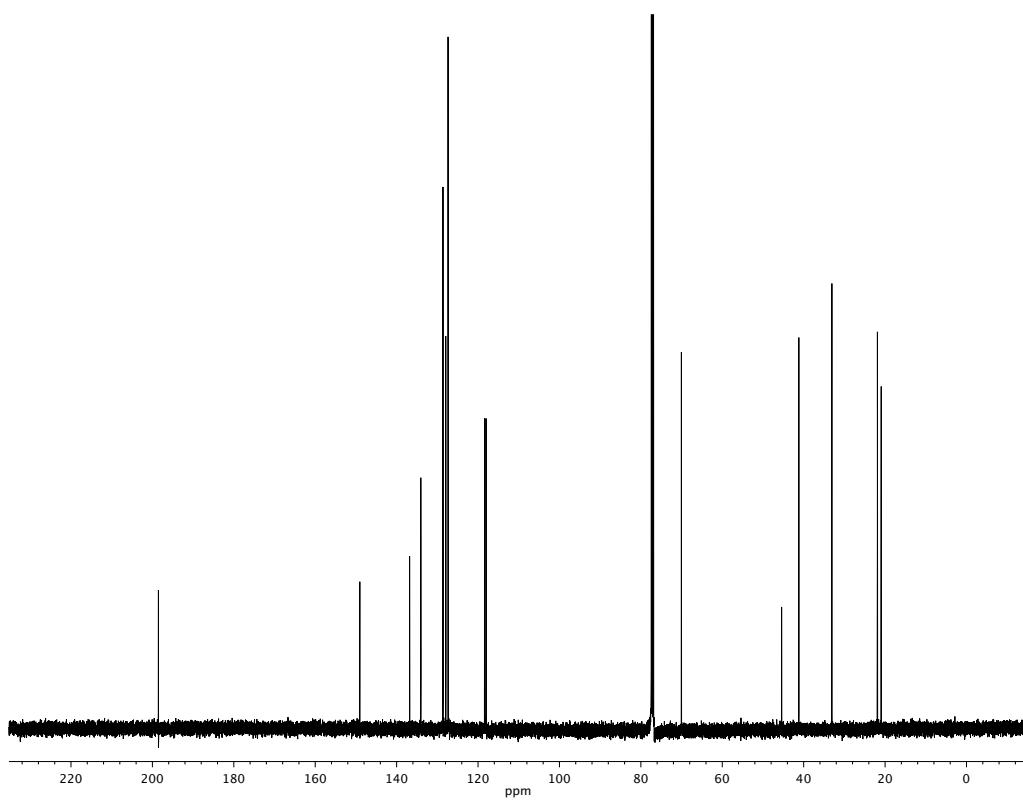

Figure SI-46C. <sup>13</sup>C NMR (125 MHz, CDCl<sub>3</sub>) of compound **19a**.

Data File C:\CHEM32\1\DATA\DCD\DCD-III-177\_GLY\_7.D  
 Sample Name: DCD-III-177\_Gly\_7

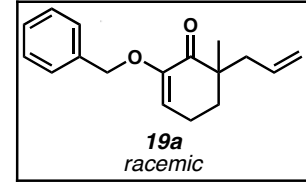

```
=====
Acq. Operator   : DCD                      Seq. Line :    3
Acq. Instrument : HPLC 1                   Location  : Vial 81
Injection Date  : 2/13/2012 5:09:54 PM     Inj       :    1
                                           Inj Volume: 5.0 µl

Acq. Method    : C:\CHEM32\1\METHODS\7IPA20_254.M
Last changed   : 4/26/2010 9:51:26 PM
Analysis Method: C:\CHEM32\1\METHODS\15IPA20_225.M
Last changed   : 2/8/2012 2:32:24 PM by JCH
                (modified after loading)
Method Info    : 15% IPA   20 min  225 nm  1 mL/min
=====
```

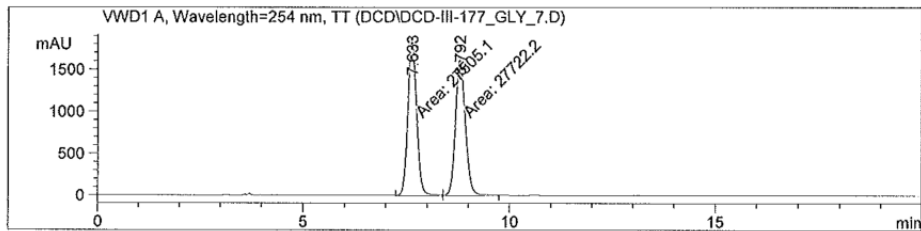

=====  
 Area Percent Report  
 =====

Sorted By : Signal  
 Multiplier: : 1.0000  
 Dilution: : 1.0000  
 Do not use Multiplier & Dilution Factor with ISTDs

Signal 1: VWD1 A, Wavelength=254 nm, TT

| Peak # | RetTime [min] | Type | Width [min] | Area mAU *s | Height [mAU] | Area %  |
|--------|---------------|------|-------------|-------------|--------------|---------|
| 1      | 7.633         | MM   | 0.2506      | 2.75051e4   | 1829.12830   | 49.8034 |
| 2      | 8.792         | MM   | 0.2865      | 2.77222e4   | 1612.60437   | 50.1966 |

Totals :                    5.52272e4 3441.73267

=====  
 Summed Peaks Report  
 =====

Signal 1: VWD1 A, Wavelength=254 nm, TT

=====  
 Final Summed Peaks Report  
 =====

Signal 1: VWD1 A, Wavelength=254 nm, TT

*Figure SI-46D.* Chiral HPLC data of racemic compound **19a**.



Data File C:\CHEM32\1\DATA\DCD\DCD-IV-021.D  
 Sample Name: DCD-IV-021

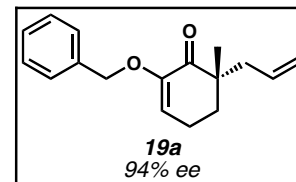

```
=====
Acq. Operator   : DCD                      Seq. Line :    3
Acq. Instrument : HPLC 1                   Location  : Vial 42
Injection Date  : 6/26/2012 1:04:32 PM     Inj       :    1
                                           Inj Volume: 5.0 µl
Different Inj Volume from Sequence !      Actual Inj Volume : 1.0 µl
Acq. Method    : C:\CHEM32\1\METHODS\7IPA20_254.M
Last changed   : 4/26/2010 9:51:26 PM
Analysis Method: C:\CHEM32\1\METHODS\1IPA15_210.M
Last changed   : 6/22/2012 5:19:03 PM by ANM
                (modified after loading)
Method Info    : 1% IPA   15 min   210 nm   1 mL/min
=====
```

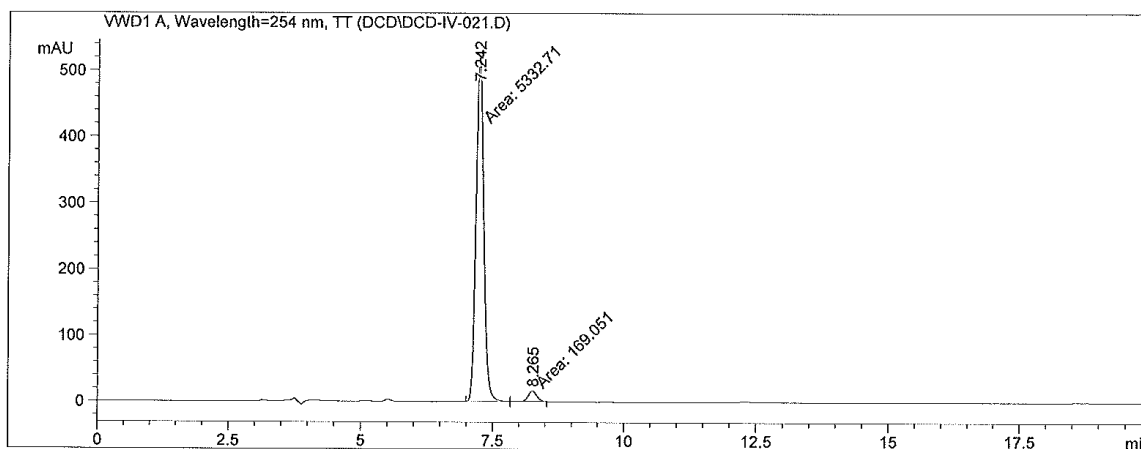

=====  
 Area Percent Report  
 =====

Sorted By : Signal  
 Multiplier: : 1.0000  
 Dilution: : 1.0000  
 Do not use Multiplier & Dilution Factor with ISTDs

Signal 1: VWD1 A, Wavelength=254 nm, TT

| Peak # | RetTime [min] | Type | Width [min] | Area mAU   | Area *s   | Height [mAU] | Area % |
|--------|---------------|------|-------------|------------|-----------|--------------|--------|
| 1      | 7.242         | MF   | 0.1711      | 5332.71240 | 519.53253 | 96.9273      |        |
| 2      | 8.265         | FM   | 0.1804      | 169.05138  | 15.61860  | 3.0727       |        |

Totals :                    5501.76378   535.15113

=====  
 Summed Peaks Report  
 =====

Figure SI-46E. Chiral HPLC data of enantioenriched compound **19a**.

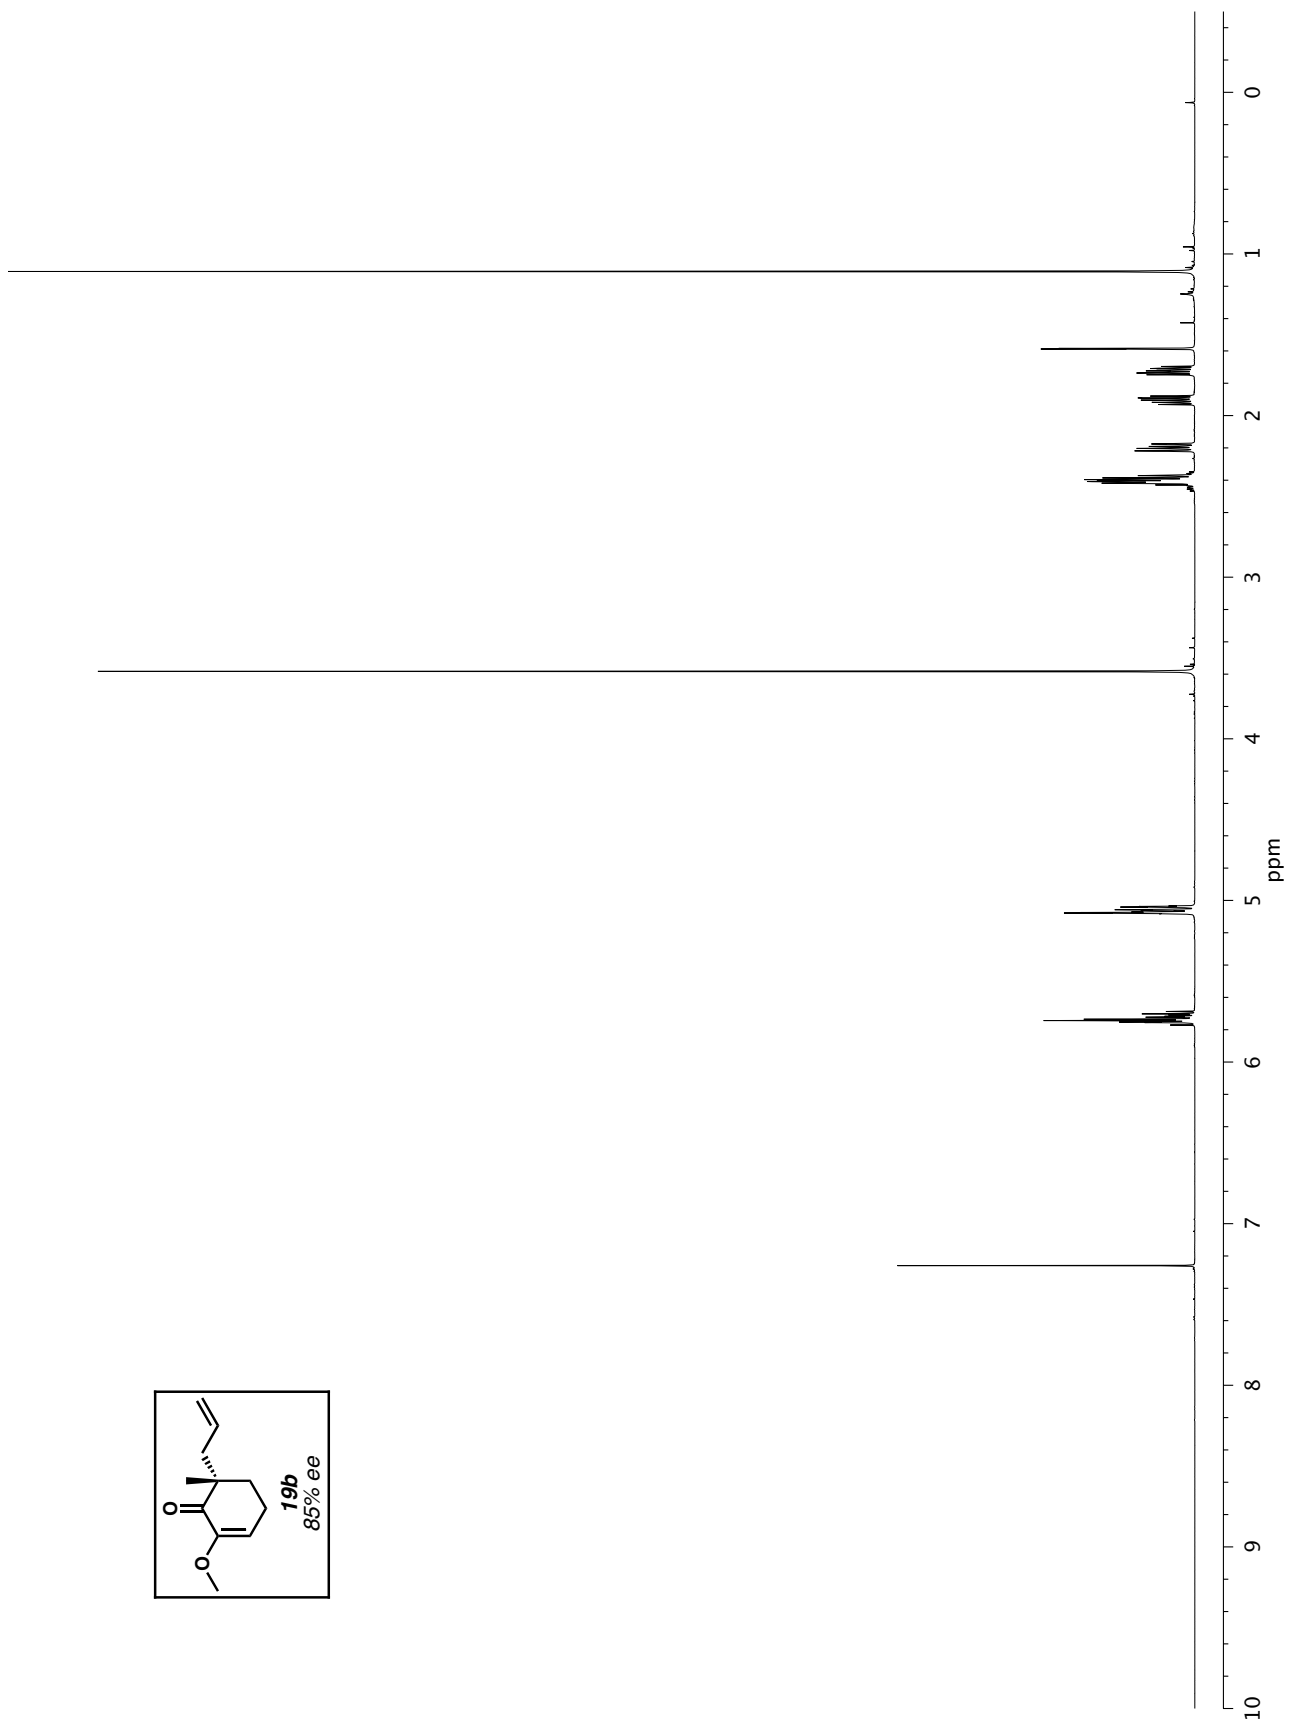

Figure SI-47A.  $^1\text{H}$  NMR (500 MHz,  $\text{CDCl}_3$ ) of compound **19b**.

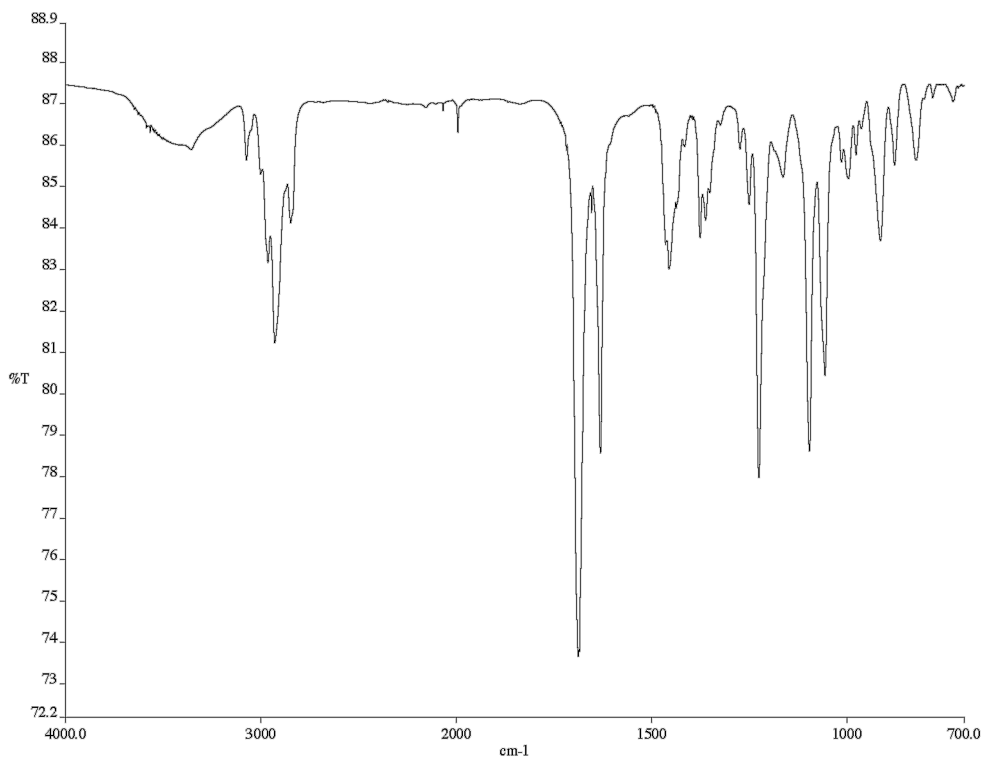

Figure SI-47B. Infrared spectrum (thin film/NaCl) of compound **19b**.

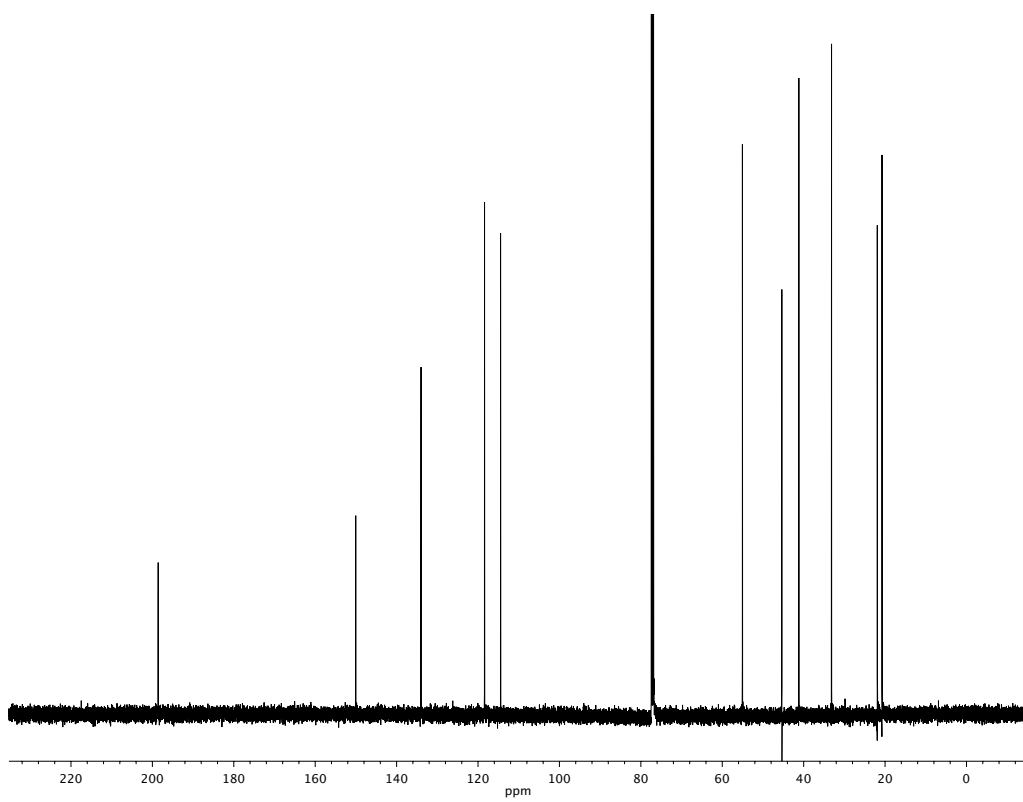

Figure SI-47C. <sup>13</sup>C NMR (125 MHz, CDCl<sub>3</sub>) of compound **19b**.

Data File C:\CHEM32\1\DATA\GAGV\DCD-IV-201\_RAC.D  
 Sample Name: DCD-IV-201\_rac

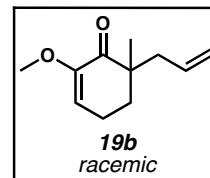

```
=====
Acq. Operator   : GAGV                      Seq. Line : 12
Acq. Instrument : HPLC 1                    Location  : Vial 73
Injection Date  : 8/23/2012 8:20:38 PM      Inj       : 1
                                           Inj Volume: 5.0 µl

Acq. Method    : C:\CHEM32\1\METHODS\2IPA20_254.M
Last changed   : 4/26/2010 9:48:36 PM
Analysis Method: C:\CHEM32\1\METHODS\025IPA30_254MG.M
Last changed   : 8/21/2012 6:18:46 PM by JCH
Method Info    : 0.25% IPA  30 min  254 nm  1 mL/min
=====
```

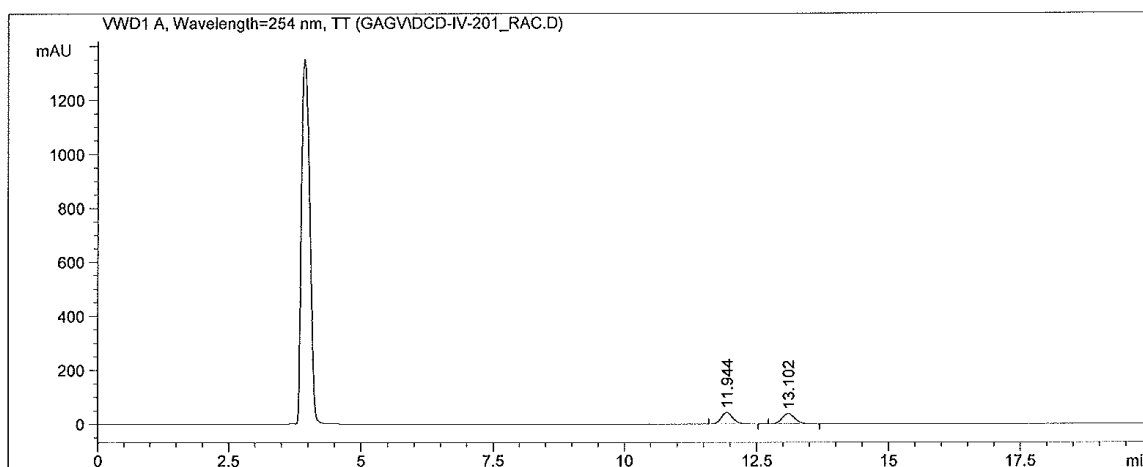

=====  
 Area Percent Report  
 =====

Sorted By : Signal  
 Multiplier: : 1.0000  
 Dilution: : 1.0000  
 Do not use Multiplier & Dilution Factor with ISTDs

Signal 1: VWD1 A, Wavelength=254 nm, TT

| Peak # | RetTime [min] | Type | Width [min] | Area mAU*s | Height [mAU] | Area %  |
|--------|---------------|------|-------------|------------|--------------|---------|
| 1      | 11.944        | BB   | 0.2333      | 636.77869  | 42.08311     | 50.0530 |
| 2      | 13.102        | BB   | 0.2569      | 635.42993  | 38.16108     | 49.9470 |

Totals : 1272.20862 80.24419

=====  
 Summed Peaks Report  
 =====

Signal 1: VWD1 A, Wavelength=254 nm, TT

Figure SI-47D. Chiral SFC data of racemic compound **19b**.

Data File C:\CHEM32\1\DATA\DCD\DCD-IV-211.D  
 Sample Name: DCD-IV-211

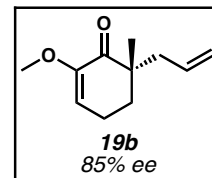

```

=====
Acq. Operator   : DCD                      Seq. Line   :    3
Acq. Instrument : HPLC 1                   Location    : Vial 52
Injection Date  : 9/20/2012 3:54:06 PM    Inj         :    1
                                           Inj Volume  : 5.0 µl

Acq. Method     : C:\CHEM32\1\METHODS\2IPA20_254.M
Last changed    : 4/26/2010 9:48:36 PM
Analysis Method : C:\CHEM32\1\METHODS\5IPA60_280.M
Last changed    : 9/20/2012 4:17:39 PM by ANM
                  (modified after loading)
Method Info     : 5% IPA   60 min  280 nm  1 mL/min
=====
  
```

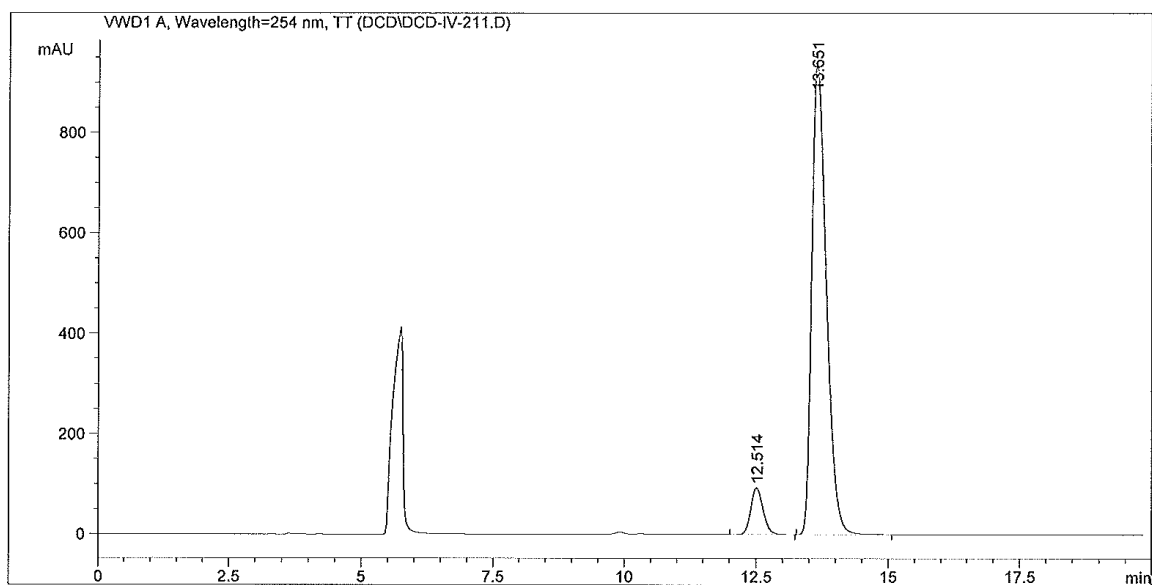

=====  
 Area Percent Report  
 =====

```

Sorted By      :      Signal
Multiplier:    :      1.0000
Dilution:      :      1.0000
Do not use Multiplier & Dilution Factor with ISTDs
  
```

Signal 1: VWD1 A, Wavelength=254 nm, TT

| Peak # | RetTime [min] | Type | Width [min] | Area mAU*s | Height [mAU] | Area %  |
|--------|---------------|------|-------------|------------|--------------|---------|
| 1      | 12.514        | VB   | 0.2516      | 1518.20447 | 93.34123     | 7.7886  |
| 2      | 13.651        | BB   | 0.2950      | 1.79745e4  | 937.44110    | 92.2114 |

Totals :                    1.94927e4 1030.78233

Figure SI-47E. Chiral SFC data of enantioenriched compound **19b**.
